# Supplementary material for: Enantioselective Pd-catalyzed dearomative reductive Heck and domino Heck–Suzuki reactions of 2-CF3-indoles
Source: Royal Society of Chemistry journal article supplement (doi:10.1039/d2cc01435a), 2022-01-01
Supplement: d2cc01435a1.pdf [file d2cc01435a1.pdf]

## Supporting Information

### Enantioselective Pd-Catalyzed Dearomative Reductive Heck and Domino Heck-Suzuki Reactions of 2-CF<sub>3</sub>-Indoles

Ren-Xiao Liang,\* Jian-Fei Chen, Ying-Ying Huang, Ya-Ping Yu, Han-Yue Zhang, Yu-Feng Song, Gavin Chit Tsui\* and Yi-Xia Jia\*

#### Table of Contents:

|                                                                                                  |      |
|--------------------------------------------------------------------------------------------------|------|
| 1. General information.....                                                                      | S1   |
| 2. Preparation of 2-CF <sub>3</sub> -indole <b>1</b> .....                                       | S1   |
| 3. Preparation of sodium tetraarylborates.....                                                   | S3   |
| 4. Procedure for enantioselective dearomative reductive Heck of <b>1</b> .....                   | S43  |
| 5. Procedure for enantioselective Heck-Suzuki reaction of <b>1</b> with Ar <sub>4</sub> BNa..... | S88  |
| 6. Synthetic transformations.....                                                                | S133 |
| 7. Crystal report of compounds <b>2f</b> and <b>3a</b> .....                                     | S139 |
| 8. References.....                                                                               | S143 |

## 1. General information

Reactions and manipulations involving organometallic or moisture sensitive compounds were carried out under nitrogen atmosphere and glassware was dried by heating gun for 15 min prior to use.  $^1\text{H}$  NMR,  $^{13}\text{C}$  NMR and  $^{19}\text{F}$  NMR spectra were recorded on Bruker AVANCE III 400 MHz or 600 MHz using  $\text{CDCl}_3$  as solvent and TMS as internal standard. Anhydrous 1,4-dioxane and toluene were freshly distilled over Na and benzophenone. Anhydrous DCM,  $\text{Et}_3\text{N}$ , and DMF were freshly distilled over  $\text{CaH}_2$ . Melting points were measured on a Büchi Melting Point B-545 apparatus and uncorrected. Commercial reagents were used as received without further purification unless otherwise noticed. HRMS were recorded on Thermo Scientific LTQ Orbitrap XL. Optical rotations were determined using a Rudolph Autopol IV polarimeter. Chiral HPLC analyses were performed using Agilent 1260 chromatography. Column chromatography was carried out using silica gel (200-300 mesh). Ligands **L1-L9** were purchased from commercial sources, and ligands **L10-L17** were prepared according to the literature procedures and used directly as received.<sup>[1,2]</sup>

## 2. Synthesis of 2-CF<sub>3</sub>-indole 1

### 2.1 For compounds 1a-1o

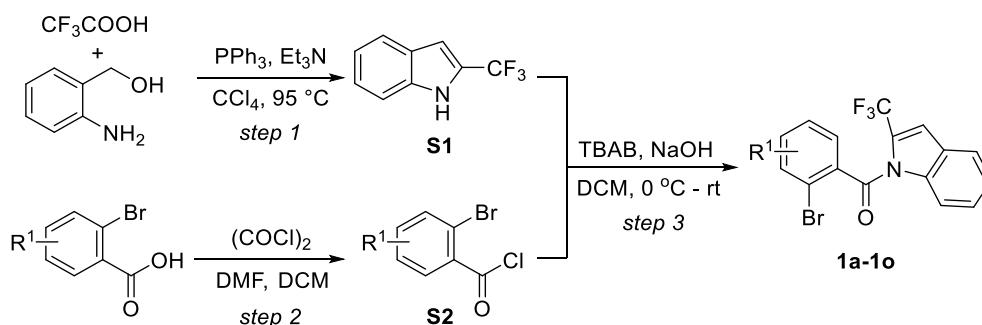

Step 1:<sup>[3]</sup>

To a three-neck bottom flask equipped with a condenser was charged with  $\text{Ph}_3\text{P}$  (7.86 g, 30 mmol),  $\text{CCl}_4$  (40 mL), and  $\text{CF}_3\text{COOH}$  (10 mmol) at  $0\text{ }^\circ\text{C}$  under a nitrogen atmosphere. After stirring for 15 min, 2-aminobenzyl alcohol (10 mmol) and  $\text{Et}_3\text{N}$  (1.4 mL, 10 mmol) was then added respectively to the reaction mixture via a syringe. The resulting mixture was allowed to reflux for 2 h. When the reaction was completed, the solution was concentrated under reduced pressure. The residue was washed with  $\text{EtOAc}$  for three times, and the precipitate was removed by filtration. The filtrate was concentrated and purified by column chromatography on silica gel eluting with  $\text{EtOAc}$ /petroleum ether 1:50 (v/v) to afford compound **S1**.

Step 2:

To a 100 mL flask was charged with benzoic acid derivative (977 mg, 8 mmol), anhydrous  $\text{DCM}$  (20 mL), and catalytic amount of  $\text{DMF}$  at  $0\text{ }^\circ\text{C}$ . The mixture was stirred for 30 minutes. Then,  $(\text{COCl})_2$  (0.89 mL, 1.3 equiv) was added dropwise via a syringe. The resulting mixture was allowed to stir at room temperature for 4 h. The solution was concentrated under reduced pressure to afford the crude acid chloride **S2**,

which was used directly for the next step without further purification.

### Step 3:

To a suspension of **S1** (1.0 equiv), sodium hydroxide (2.5 equiv), and TBAB (20 mol%) in DCM (0.5 M with respect to **S1**) was added a solution of **S2** (1.5 equiv, 2 M) in DCM dropwise at 0 °C. The reaction mixture was stirred at 0 °C for 30 minutes. After adding additional 0.5 equivalent of **S2** in DCM (2 M) dropwise, the resulting mixture was allowed to stir at room temperature overnight. The solution was extracted with DCM and the combined organic layers were washed with brine, dried over Na<sub>2</sub>SO<sub>4</sub>, and concentrated under reduced pressure. The residue was purified by column chromatography on silica gel eluting with EtOAc/petroleum ether (1:100) to afford compounds **1a-1o**.

## 2.2 For compounds 1p-1t

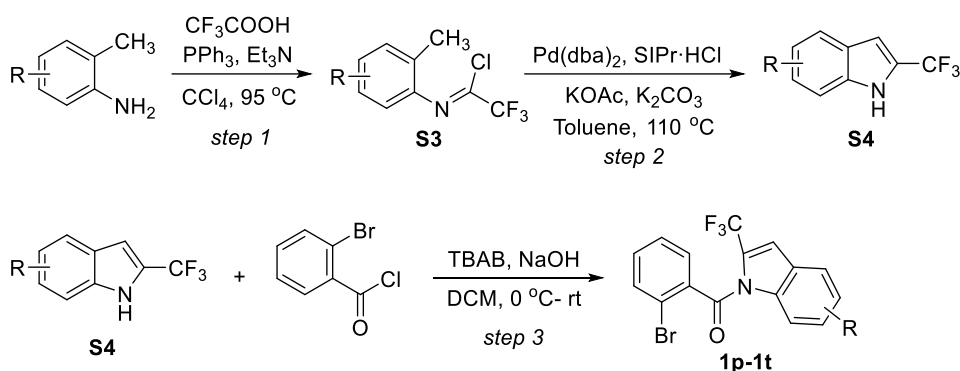

### Step 1:<sup>[4]</sup>

To a flask equipped with a condenser was charged with Ph<sub>3</sub>P (34.5 g, 132 mmol), Et<sub>3</sub>N (7.3 mL, 53 mmol), CCl<sub>4</sub> (21.1 mL, 220 mmol), and CF<sub>3</sub>CO<sub>2</sub>H (44 mmol) at 0 °C under nitrogen atmosphere. After stirring for 10 min, a solution of *o*-methylaniline (44 mmol) in CCl<sub>4</sub> (21.1 mL, 220 mmol) was added dropwise to the reaction mixture. Upon completion of the addition, the reaction mixture was allowed to reflux for 3 h. The solution was then concentrated under reduced pressure and petroleum ether was then added. The precipitate was removed via filtration and the filtrate was concentrated under reduced pressure. The residue was purified by column chromatography on silica gel eluting with EtOAc/petroleum ether (1:100) to afford compound **S3**.

### Step 2:<sup>[5]</sup>

To a flask was charged with Pd(dba)<sub>2</sub> (11.6 mg, 0.02 mmol, 1.0 mol%), SIPr·HCl (8.6 mg, 0.022 mmol, 1.1 mol%), anhydrous KOAc (392 mg, 4.0 mmol, 2.0 equiv) and K<sub>2</sub>CO<sub>3</sub> (884 mg, 6.4 mmol, 3.2 equiv) under N<sub>2</sub> atmosphere. Toluene (2 mL) was introduced via a syringe. The resulting mixture was stirred at room temperature for 10 min, then a solution of **S3** (2.0 mmol, 1.0 equiv) in 3 mL toluene were then added. After adding additional 3 mL of toluene, the reaction mixture was allowed to stir at 110 °C (oil bath) for 12 h. When the reaction was completed, the solution was concentrated under reduced pressure. The residue was purified by column chromatography on silica gel eluting with EtOAc/petroleum (1:100) to afford compound **S4**.

Step 3:

To a suspension of **S4** (1.0 equiv), sodium hydroxide (2.5 equiv), and TBAB (20 mol%) in DCM (0.5 M with respect to **S4**) was added a solution of 2-bromobenzoyl chloride (1.5 equiv, 2 M) in DCM dropwise at 0 °C. The reaction mixture was stirred at 0 °C for 30 minutes. After adding additional 0.5 equivalent of 2-bromobenzoyl chloride in DCM (2 M) dropwise, the resulting mixture was allowed to stir at room temperature overnight. The solution was extracted with DCM and the combined organic layers were washed with brine, dried over Na<sub>2</sub>SO<sub>4</sub>, and concentrated under reduced pressure. The residue was purified by column chromatography on silica gel eluting with EtOAc/petroleum ether (1:100) to afford compounds **1p-1t**.

### 3. Preparation of sodium tetraarylborates

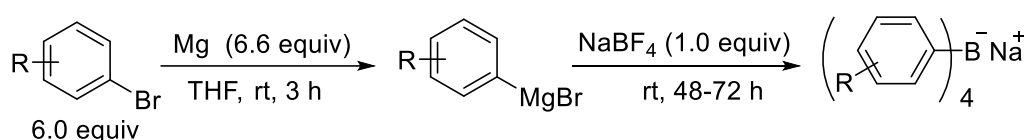

Sodium tetraarylborates were prepared according to the literature.<sup>[6]</sup> To a suspension of Mg powder (6.6 equiv) in THF (20 mL) was added a grain of iodine, then a solution of aryl bromides (6.0 equiv) in THF (20 mL) was slowly added. The resulting mixture was stirred at room temperature for 3 h, giving a dark gray solution of the aryl Grignard reagent. Upon addition of NaBF<sub>4</sub> (1.0 equiv), the heterogeneous reaction mixture was stirred for additional 48-72 h. The reaction mixture was then poured into a solution of Na<sub>2</sub>CO<sub>3</sub> in water and stirred for 20 min. After filtering, the filtrate was extracted with ethyl acetate, dried over Na<sub>2</sub>SO<sub>4</sub>, and concentrated under reduced pressure. The residue was recrystallized from petroleum ether to afford sodium tetraarylborates.

#### **(2-Bromophenyl)(2-(trifluoromethyl)-1H-indol-1-yl)methanone (1a):**

Purified by chromatography on silica gel, eluting with ethyl acetate/petroleum ether 1:100 (v/v); white solid, 95% yield (for the last step); m.p. 74-76 °C. <sup>1</sup>H NMR (600 MHz, CDCl<sub>3</sub>) δ 7.69 (dd, *J* = 7.8, 1.3 Hz, 1H), 7.64 (d, *J* = 7.8 Hz, 1H), 7.57 (dd, *J* = 7.4, 1.9 Hz, 1H), 7.54-7.43 (m, 2H), 7.31 (s, 1H), 7.29-7.22 (m, 1H), 7.18-7.08 (m, 1H), 6.44 (d, *J* = 8.6 Hz, 1H). <sup>13</sup>C NMR (150 MHz, CDCl<sub>3</sub>) δ 165.5, 137.0, 136.6, 133.9, 133.0, 130.3, 128.1, 127.8, 127.2, 126.8, 123.9, 122.6, 120.7 (q, *J* = 267.0 Hz), 137.8, 115.1 (q, *J* = 4.5 Hz), 113.9. <sup>19</sup>F NMR (377 MHz, CDCl<sub>3</sub>) δ -58.4 ppm. HRMS *m/z* (ESI<sup>+</sup>): Calcd for C<sub>16</sub>H<sub>9</sub>BrF<sub>3</sub>NONa<sup>+</sup> (*M*+Na)<sup>+</sup> 389.9716, found 389.9717.

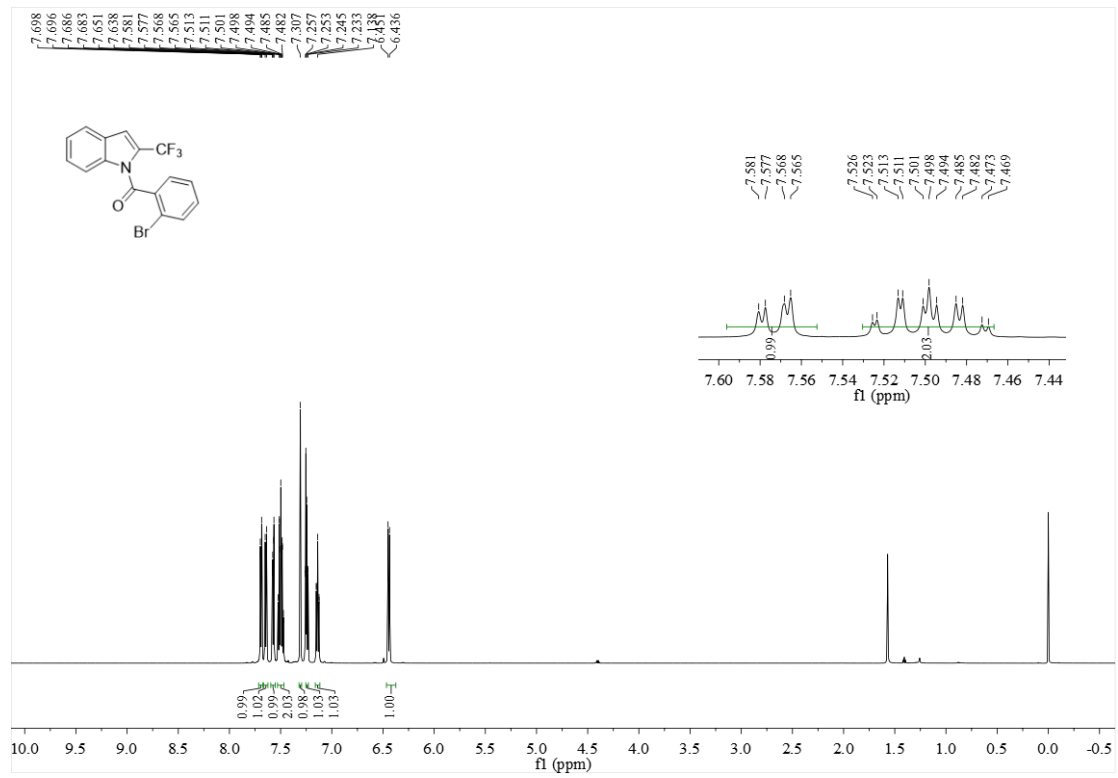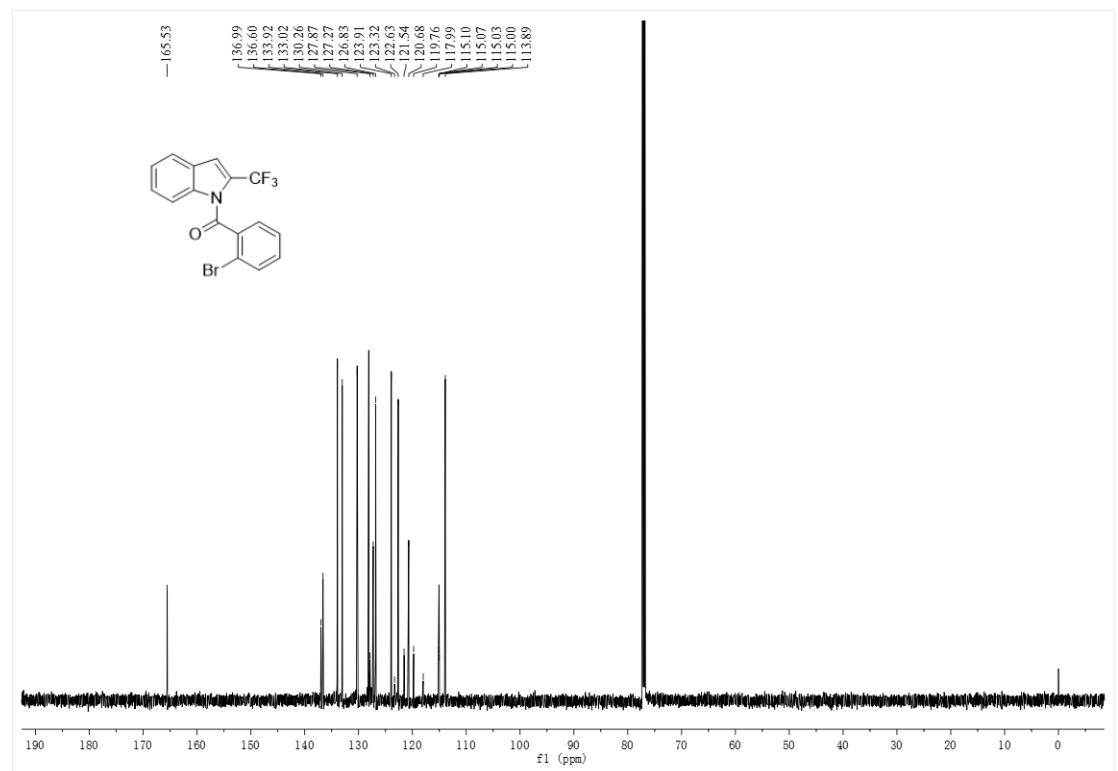

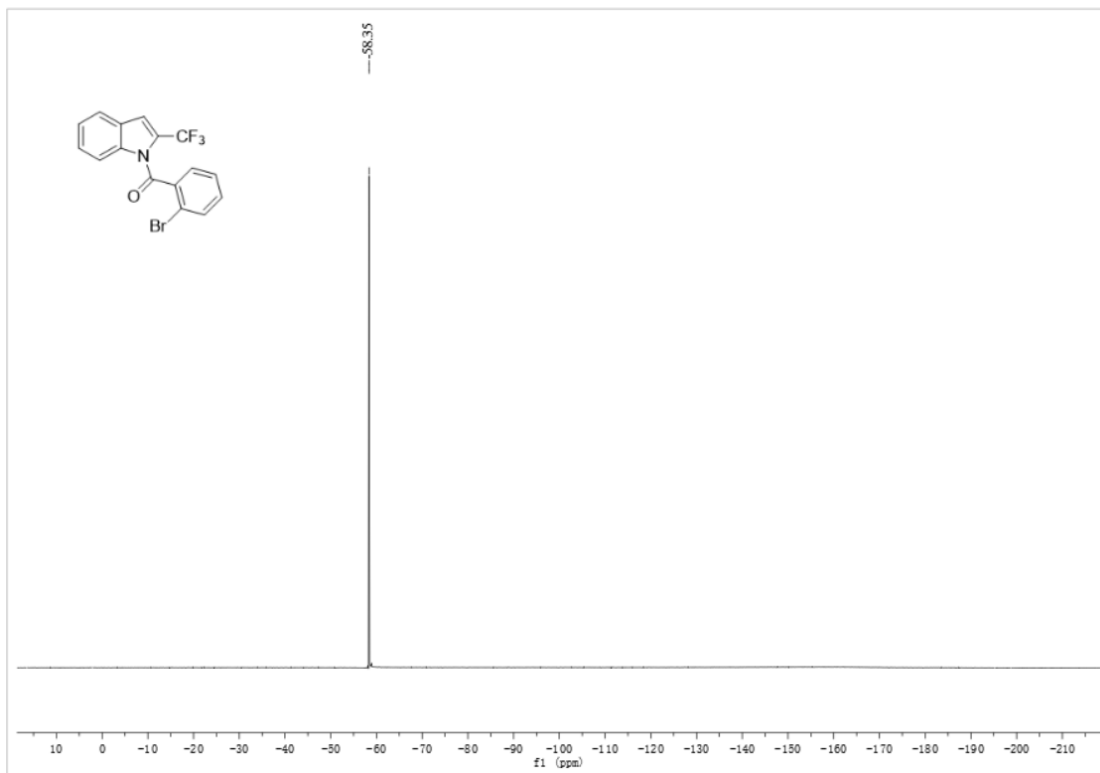

**(2-Bromo-4-methoxyphenyl)(2-(trifluoromethyl)-1H-indol-1-yl)methanone (1b):**

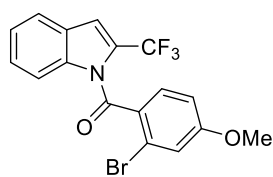

Purified by chromatography on silica gel, eluting with ethyl acetate/petroleum ether 1:100 (v/v); white solid 85% yield (for the last step); m.p. 81-83 °C. <sup>1</sup>H NMR (400 MHz, CDCl<sub>3</sub>) δ 7.66 (d, *J* = 7.7 Hz, 1H), 7.51 (d, *J* = 8.6 Hz, 1H), 7.28 (s, 1H), 7.23 (d, *J* = 7.3 Hz, 1H), 7.24-7.18 (m, 2H), 7.01 (dd, *J* = 8.6, 2.5 Hz, 1H), 6.58 (dd, *J* = 8.5, 1.3 Hz, 1H), 3.90 (s, 3H). <sup>13</sup>C NMR (100 MHz, CDCl<sub>3</sub>) δ 165.6, 162.8, 137.2, 132.3, 128.3, 128.2, 127.8, 127.1, 126.6, 123.6, 122.5 (d, *J* = 5.0 Hz), 120.7 (q, *J* = 267.0 Hz), 122.0, 119.4 (d, *J* = 2.8 Hz), 114.2 (q, *J* = 5.0 Hz), 113.9 (d, *J* = 1.6 Hz), 55.9. <sup>19</sup>F NMR (377 MHz, CDCl<sub>3</sub>) δ -58.1 ppm. HRMS *m/z* (ESI<sup>+</sup>): Calcd for C<sub>17</sub>H<sub>11</sub>BrF<sub>3</sub>NO<sub>2</sub>Na<sup>+</sup> (M+Na)<sup>+</sup> 419.9817, found 419.9815.

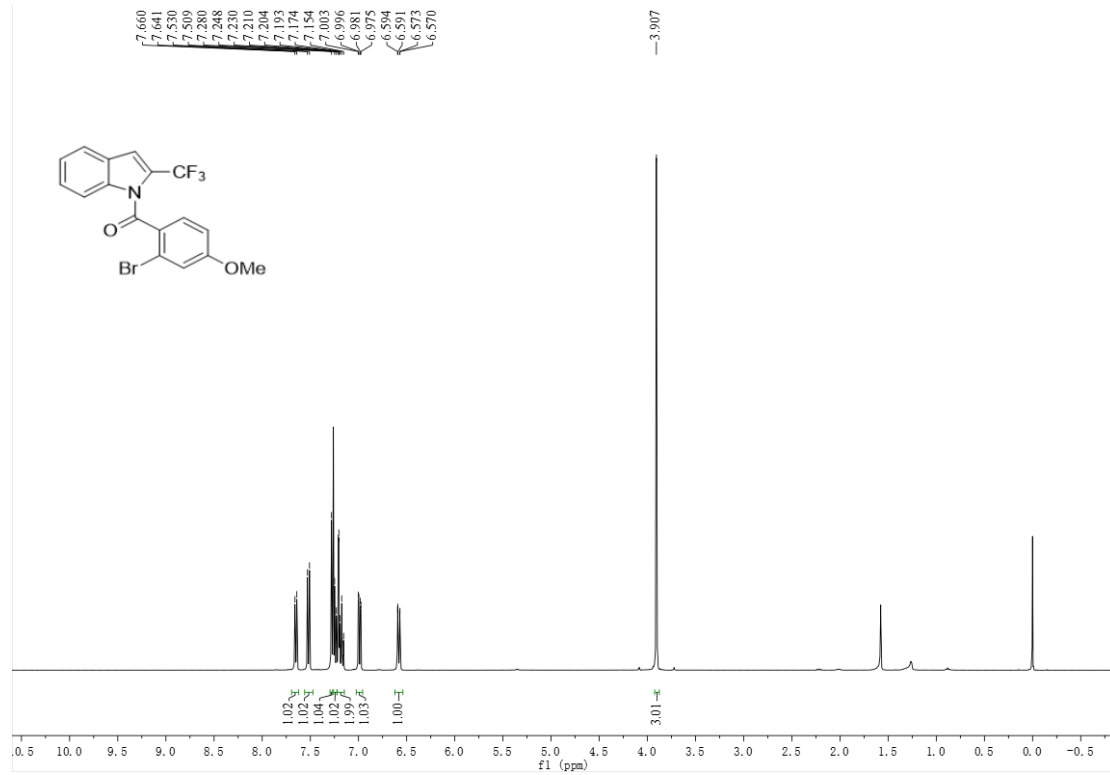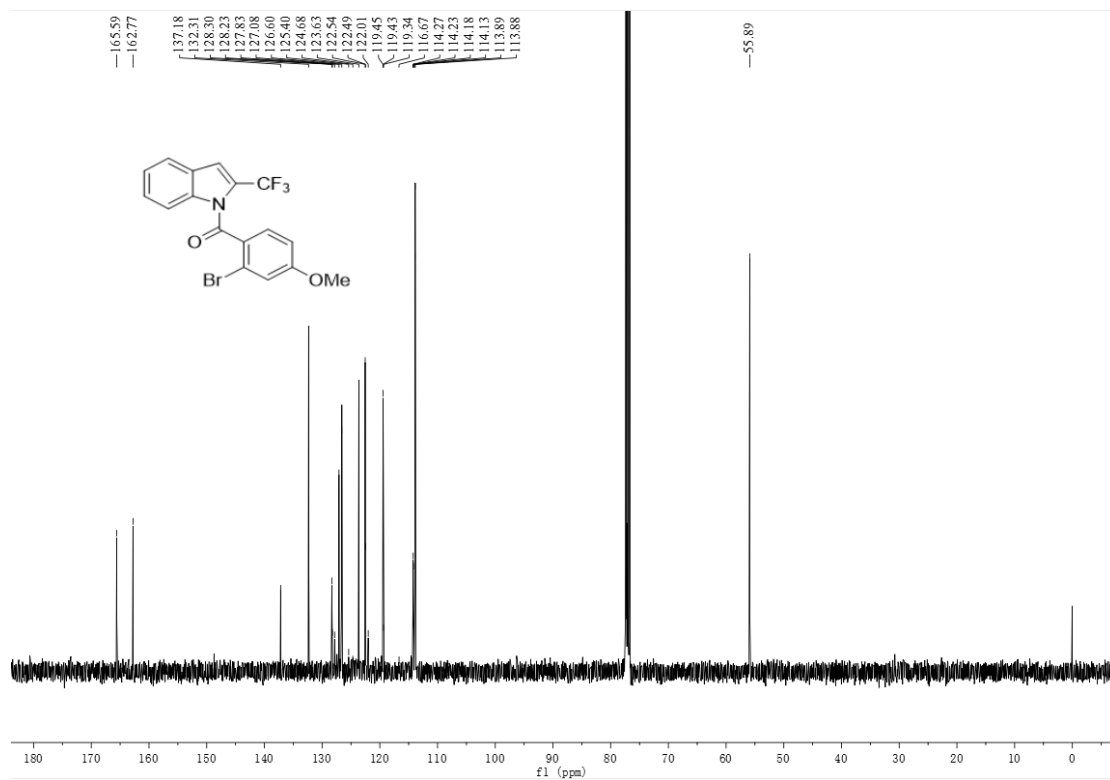

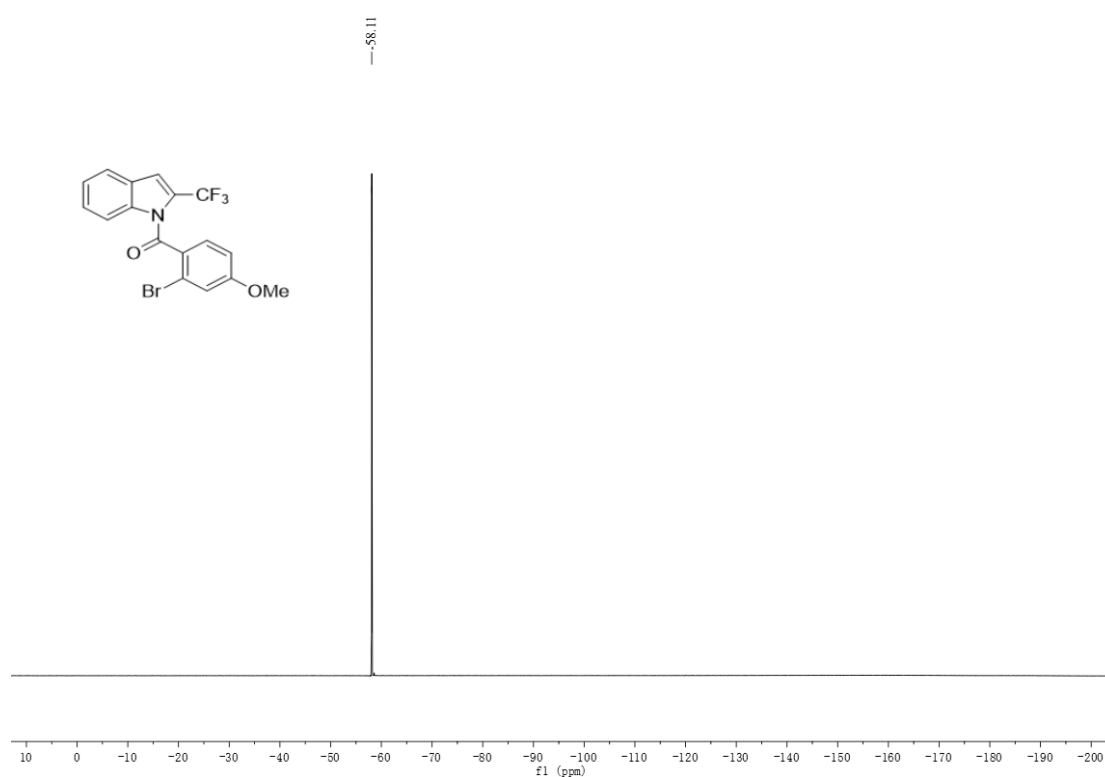

**(2-Bromo-4-methylphenyl)(2-(trifluoromethyl)-1H-indol-1-yl)methanone (1c):**

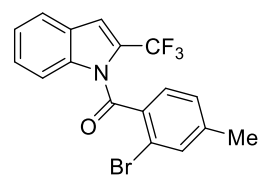

Purified by chromatography on silica gel, eluting with ethyl acetate/petroleum ether 1:100 (v/v); white solid 88% yield (for the last step); m.p. 87-89 °C. <sup>1</sup>H NMR (600 MHz, CDCl<sub>3</sub>) δ 7.64 (d, *J* = 7.9 Hz, 1H), 7.54 (d, *J* = 8.9 Hz, 1H), 7.31 (s, 1H), 7.26 (d, *J* = 5.9 Hz, 1H), 7.19 (t, *J* = 7.9 Hz, 1H), 7.13 (d, *J* = 3.0 Hz, 1H), 7.03 (dd, *J* = 8.9, 3.1 Hz, 1H), 6.47 (d, *J* = 8.6 Hz, 1H), 3.84 (s, 3H). <sup>13</sup>C NMR (100 MHz, CDCl<sub>3</sub>) δ 165.7, 144.2, 137.1, 134.5, 133.6, 130.4, 128.8, 127.6 (q, *J* = 40.0 Hz), 127.2, 126.7, 123.7, 122.5, 120.71, 120.67 (q, *J* = 267.0 Hz), 114.6 (q, *J* = 5.0 Hz), 113.9, 21.3. <sup>19</sup>F NMR (377 MHz, CDCl<sub>3</sub>) δ -58.2 ppm. HRMS *m/z* (ESI<sup>+</sup>): Calcd for C<sub>17</sub>H<sub>11</sub>BrF<sub>3</sub>NONa<sup>+</sup> (M+Na)<sup>+</sup> 403.9868, found 403.9870.



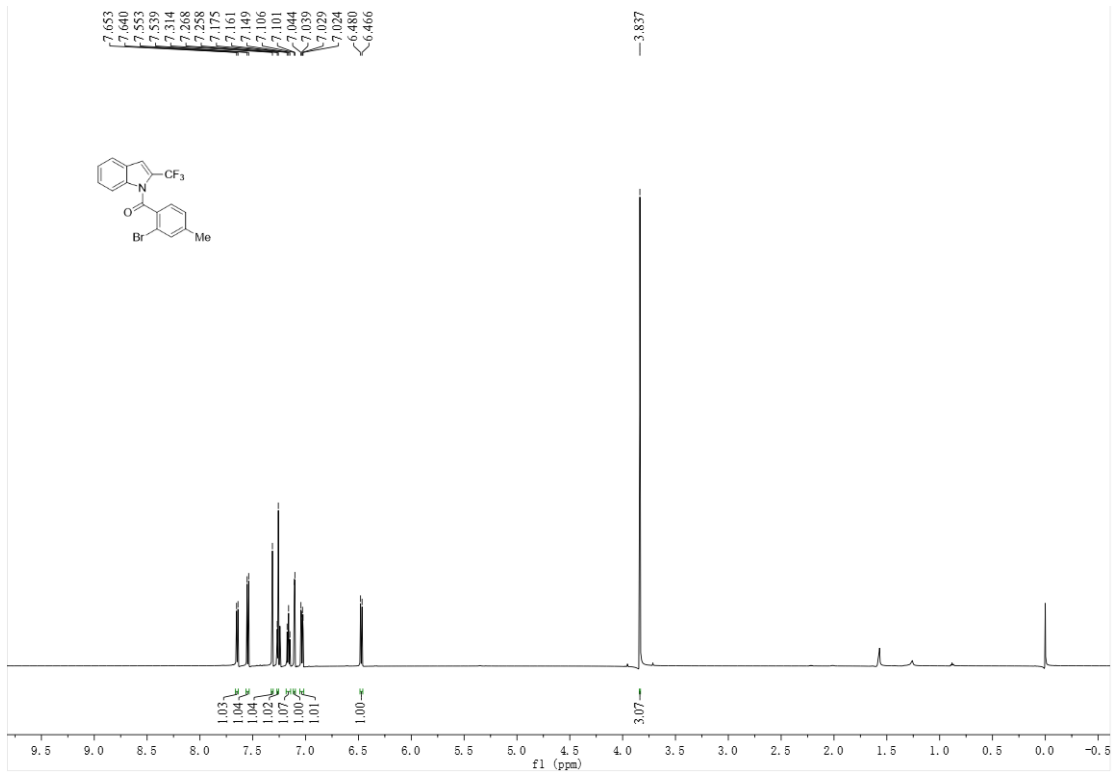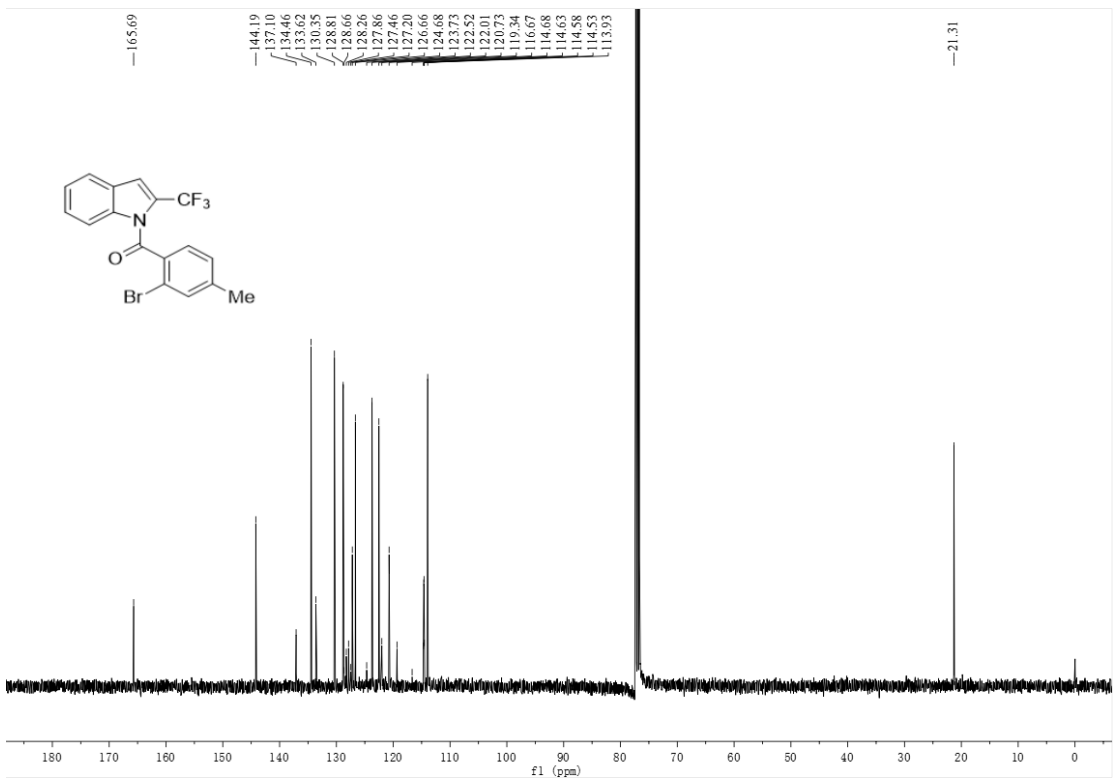

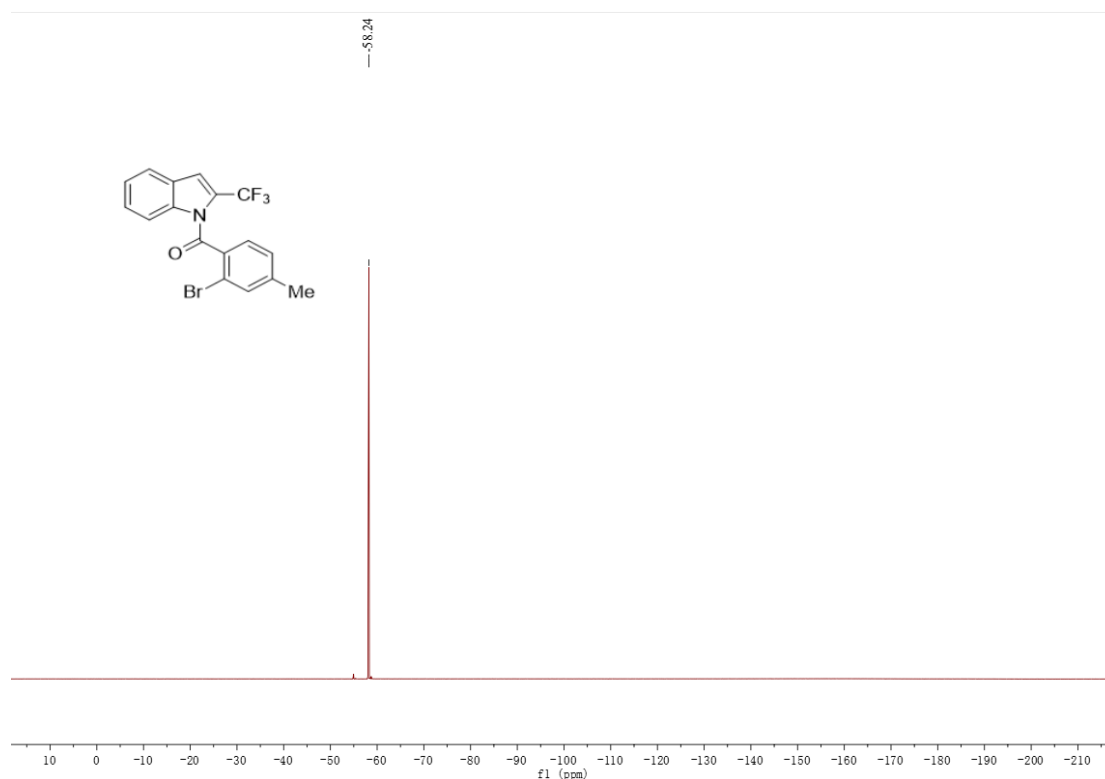

**(2-Bromo-4-chlorophenyl)(2-(trifluoromethyl)-1H-indol-1-yl)methanone (1d):**

Purified by chromatography on silica gel, eluting with ethyl acetate/petroleum ether 1:100 (v/v); white solid 77% yield (for the last step); m.p. 94-96 °C. <sup>1</sup>H NMR (400 MHz, CDCl<sub>3</sub>) δ 7.71 (s, 1H), 7.66 (d, *J* = 7.9 Hz, 1H), 7.53-7.48 (m, 2H), 7.30 (t, *J* = 7.4 Hz, 2H), 7.21 (t, *J* = 8.4 Hz, 1H), 6.58 (d, *J* = 8.4 Hz, 1H). <sup>13</sup>C NMR (100 MHz, CDCl<sub>3</sub>) δ 164.8, 138.7, 136.9, 134.9, 133.8, 131.3, 128.6, 128.3 (q, *J* = 40.0 Hz), 127.2, 127.0, 124.1, 122.8, 121.5, 120.6 (q, *J* = 267.0 Hz), 115.2 (q, *J* = 5.0 Hz), 113.8. <sup>19</sup>F NMR (377 MHz, CDCl<sub>3</sub>) δ -58.2 ppm. HRMS *m/z* (ESI<sup>+</sup>): Calcd for C<sub>16</sub>H<sub>8</sub>BrClF<sub>3</sub>NONa<sup>+</sup> (M+Na)<sup>+</sup> 423.93221, found 423.9325.

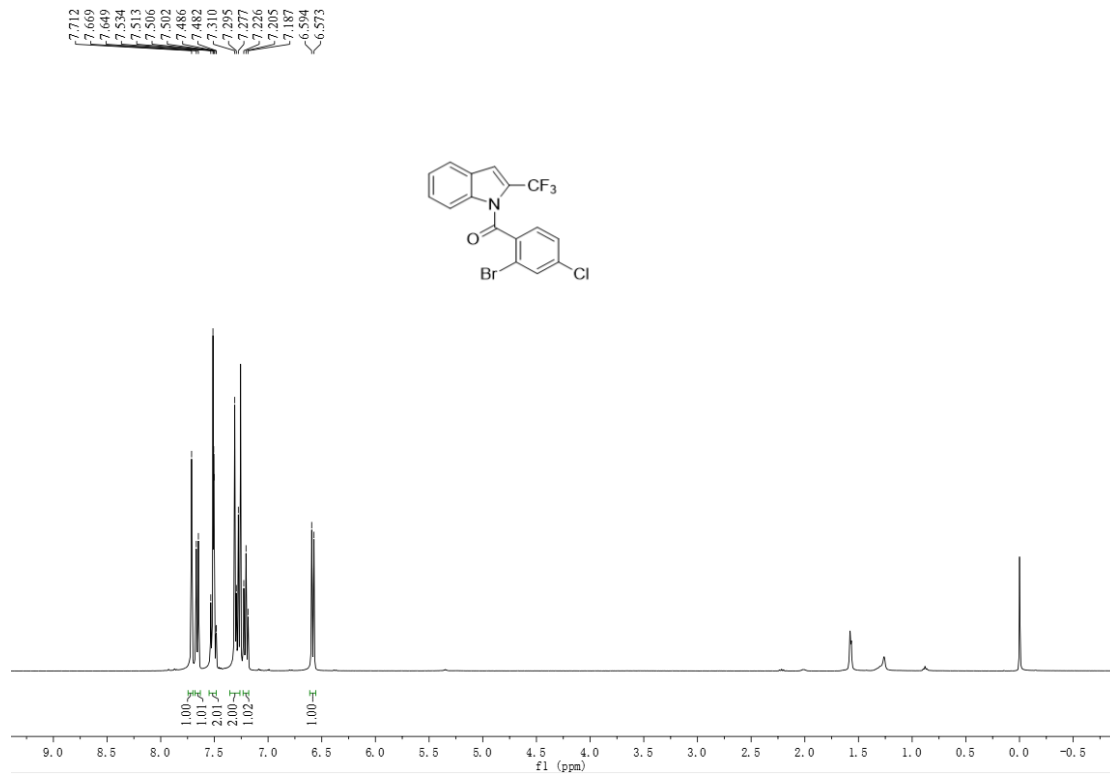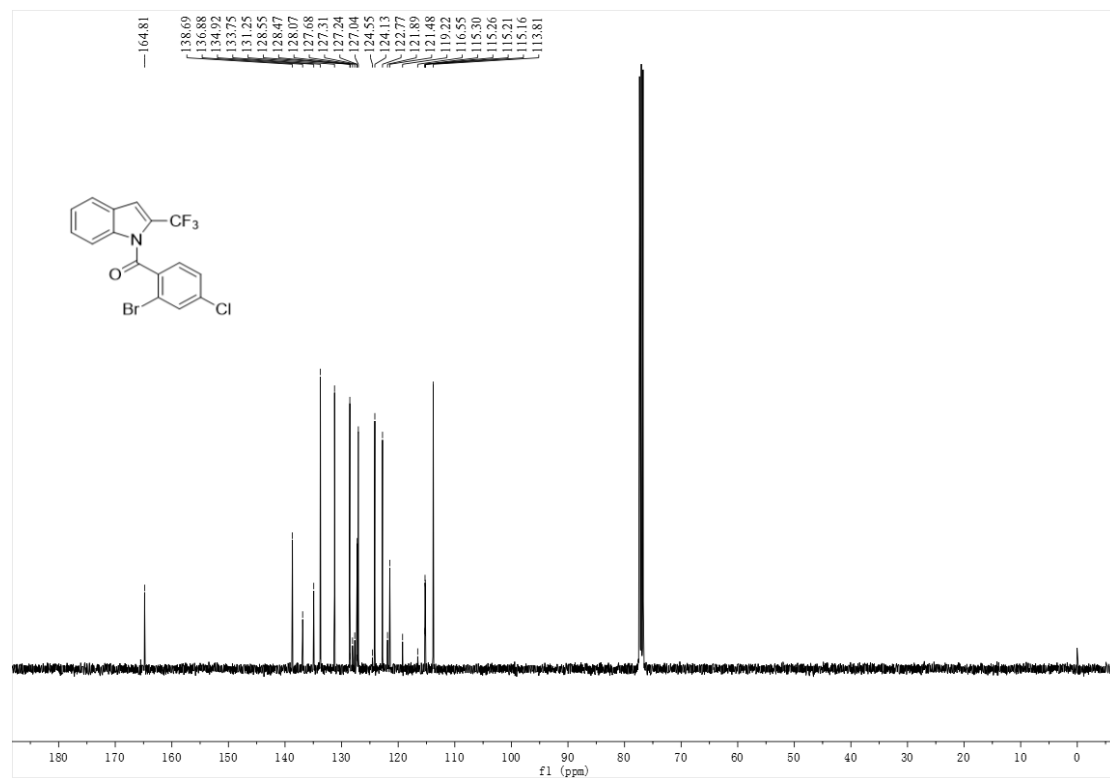

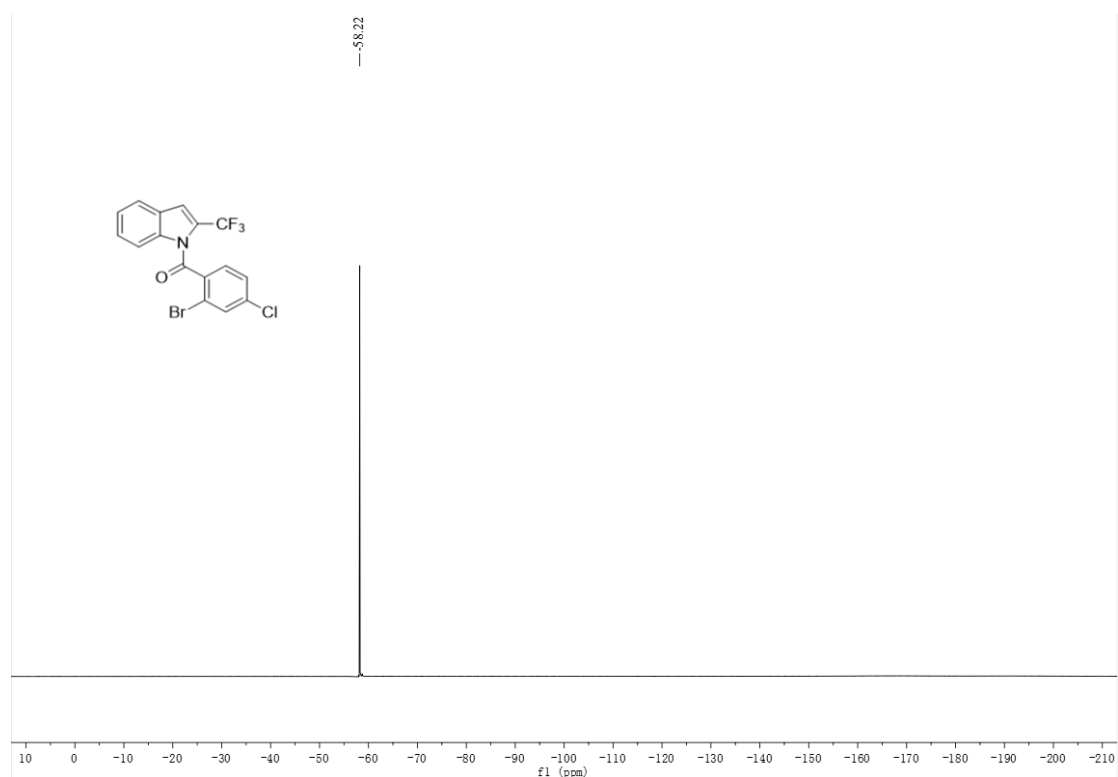

**(2-Bromo-4-fluorophenyl)(2-(trifluoromethyl)-1H-indol-1-yl)methanone (1e):**

Purified by chromatography on silica gel, eluting with ethyl acetate/petroleum ether 1:100 (v/v); white solid 79% yield (for the last step); m.p. 98-100 °C. <sup>1</sup>H NMR (400 MHz, CDCl<sub>3</sub>) δ 7.66 (d, *J* = 7.8 Hz, 1H), 7.60 (dd, *J* = 8.6, 5.7 Hz, 1H), 7.44 (dd, *J* = 8.1, 2.4 Hz, 1H), 7.30 (d, *J* = 13.1 Hz, 2H), 7.23-7.18 (m, 2H), 6.57 (d, *J* = 8.6 Hz, 1H). <sup>13</sup>C NMR (100 MHz, CDCl<sub>3</sub>) δ 164.9, 164.1 (d, *J* = 257.0 Hz), 137.0, 132.8 (d, *J* = 4.0 Hz), 132.3 (d, *J* = 9.0 Hz), 127.2, 127.0, 124.1, 122.8, 122.0 (d, *J* = 11.0 Hz), 121.7, 121.4, 120.5 (q, *J* = 267.0 Hz), 115.8 (d, *J* = 22.0 Hz), 115.6 (q, *J* = 5.0 Hz), 113.8. <sup>19</sup>F NMR (377 MHz, CDCl<sub>3</sub>) δ -58.2, -104.2 ppm. HRMS *m/z* (ESI<sup>+</sup>): Calcd for C<sub>16</sub>H<sub>8</sub>BrF<sub>4</sub>NONa<sup>+</sup> (M+Na)<sup>+</sup> 419.9818, found 419.9815.

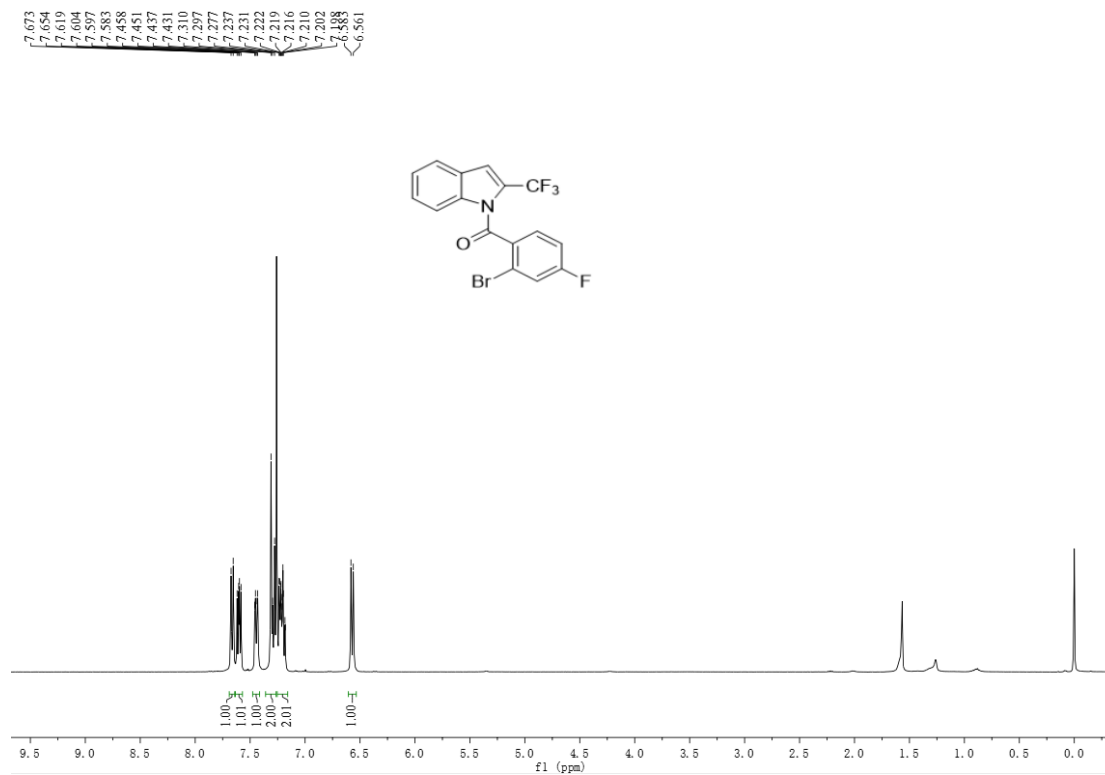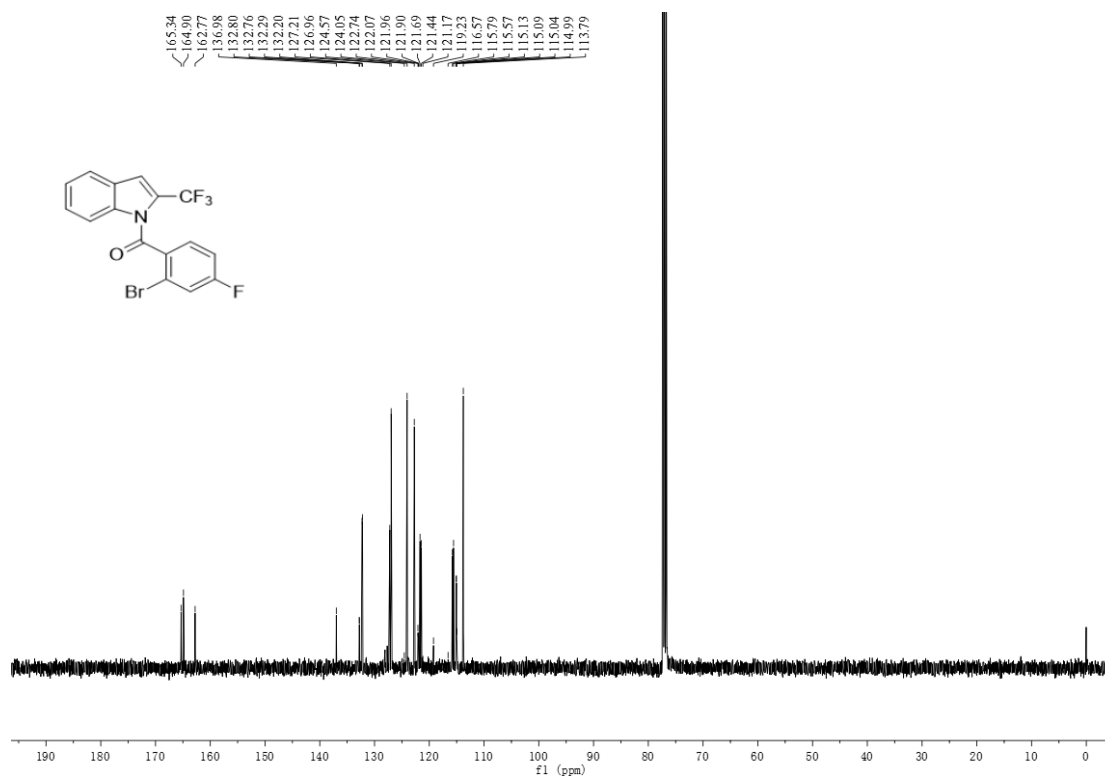

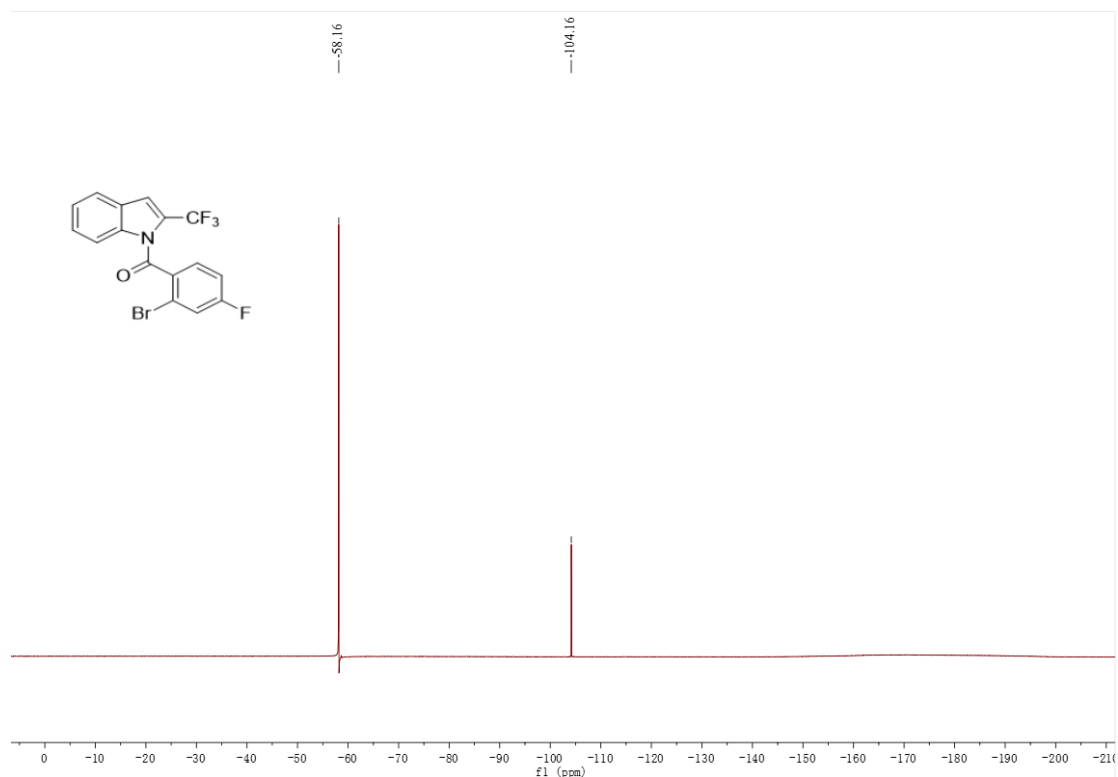

**(2-Bromo-4-trifluoromethylphenyl)(2-(trifluoromethyl)-1H-indol-1-yl)methanone (1f):**

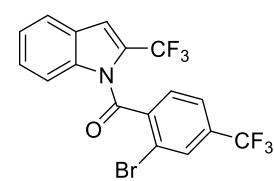

Purified by chromatography on silica gel, eluting with ethyl acetate/petroleum ether 1:100 (v/v); white solid 62% yield (for the last step); m.p. 95-97 °C. <sup>1</sup>H NMR (600 MHz, CDCl<sub>3</sub>) δ 7.96 (s, 1H), 7.78 (d, *J* = 8.0 Hz, 1H), 7.70 (d, *J* = 8.0 Hz, 1H), 7.67 (d, *J* = 7.8 Hz, 1H), 7.34 (s, 1H), 7.29 (t, *J* = 7.5 Hz, 1H), 7.21 (t, *J* = 7.9 Hz, 1H), 6.58 (d, *J* = 8.6 Hz, 1H). <sup>13</sup>C NMR (150 MHz, CDCl<sub>3</sub>) δ 164.4, 140.0, 136.9, 134.7 (q, *J* = 34.5 Hz), 130.8 (q, *J* = 4.5 Hz), 130.6, 127.8 (q, *J* = 40.5 Hz), 127.3, 127.2, 125.1 (q, *J* = 3.0 Hz), 124.4, 122.9, 122.5 (q, *J* = 272.0 Hz), 121.1, 120.5 (q, *J* = 267.0 Hz), 115.8 (q, *J* = 4.5 Hz), 113.8. <sup>19</sup>F NMR (377 MHz, CDCl<sub>3</sub>) δ -58.3, -63.1 ppm. HRMS *m/z* (ESI<sup>+</sup>): Calcd for C<sub>17</sub>H<sub>8</sub>BrF<sub>6</sub>NONa<sup>+</sup> (M+Na)<sup>+</sup> 457.9586, found 457.9586.

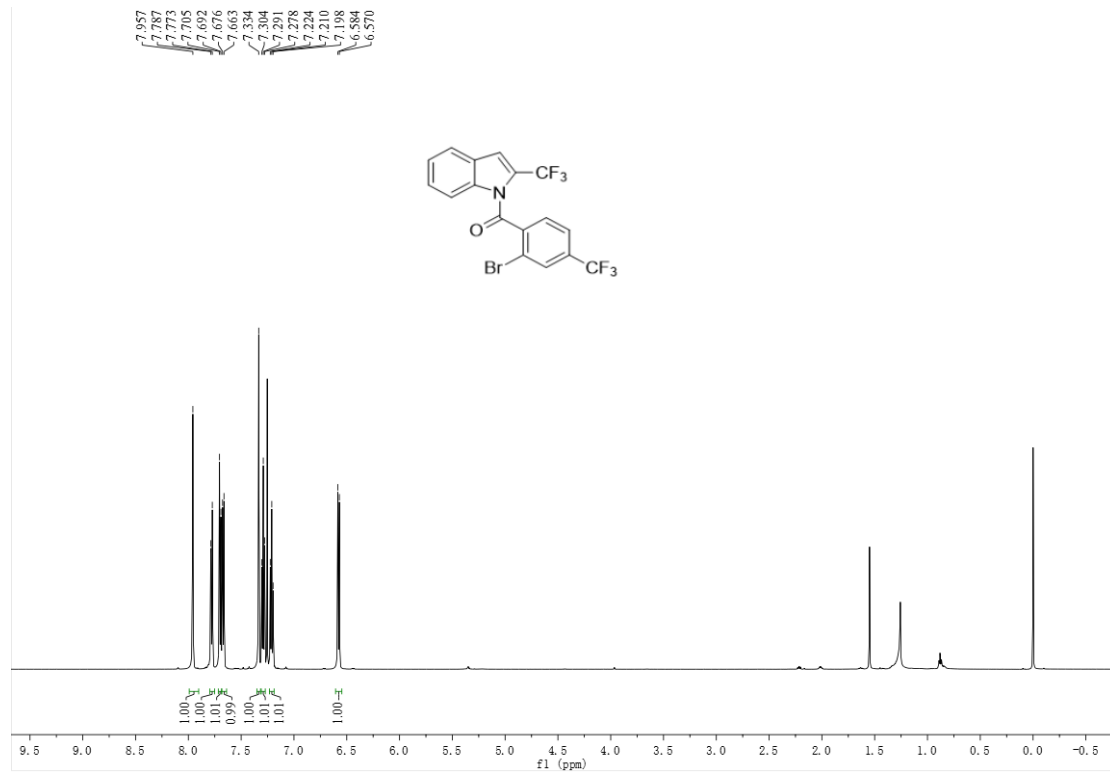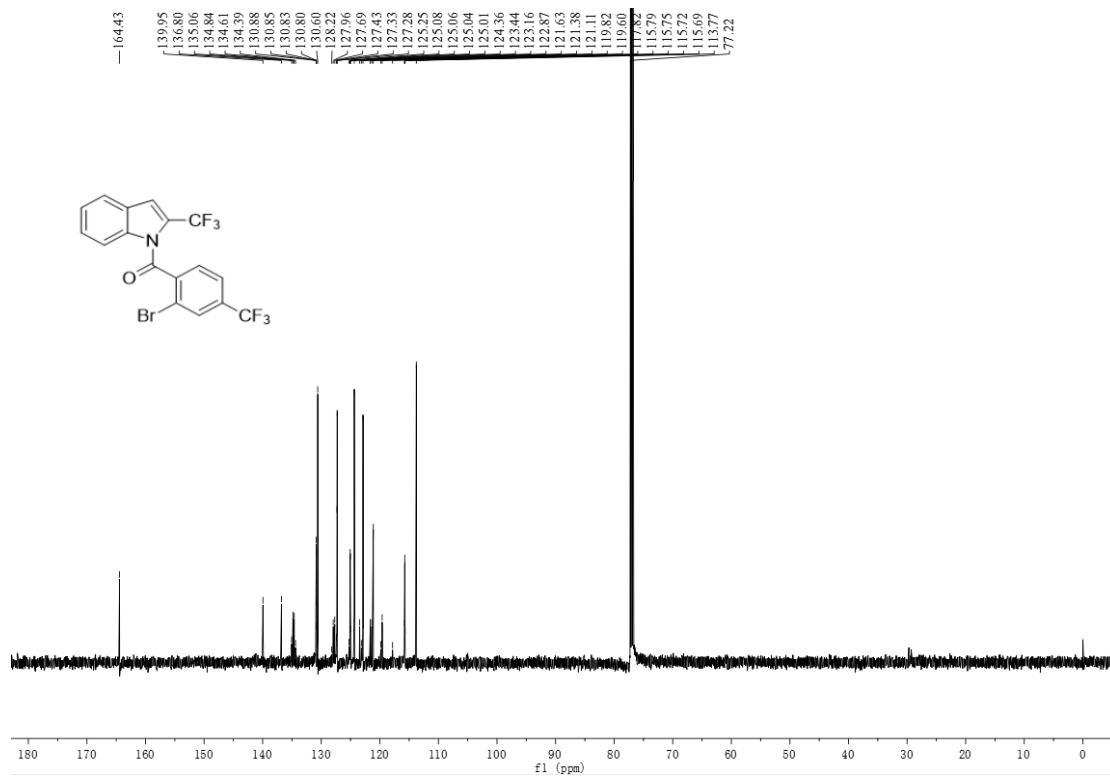

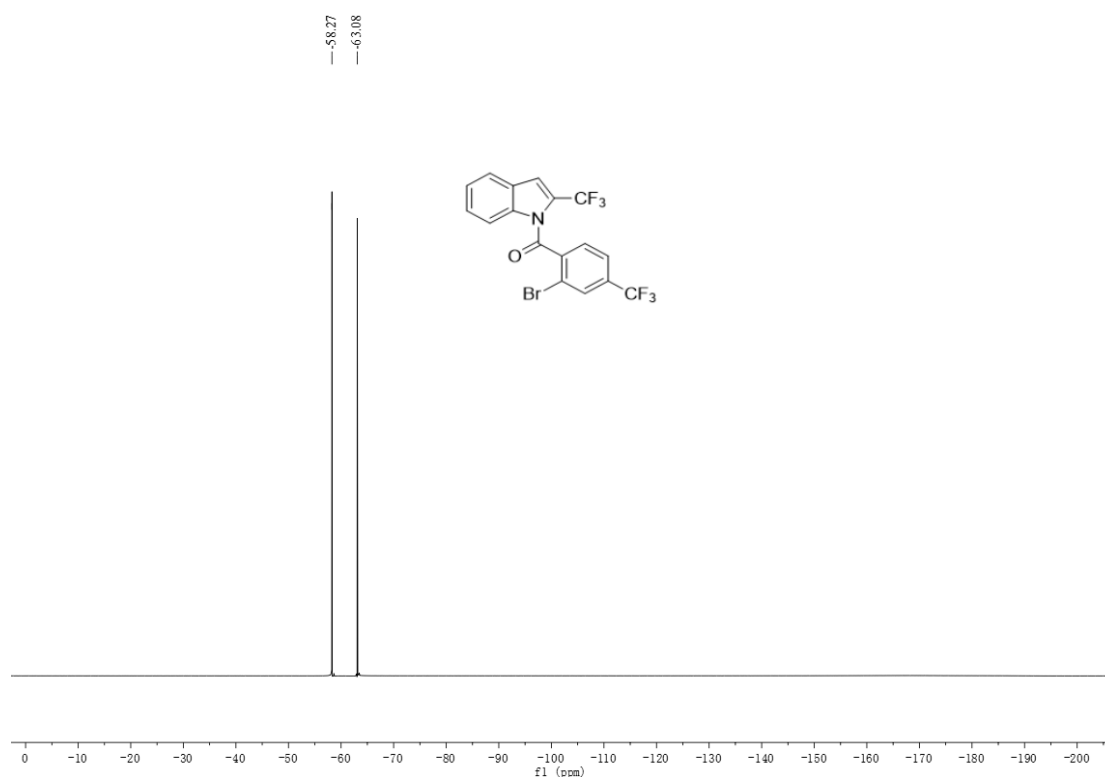

**(2-Bromo-5-methoxyphenyl)(2-(trifluoromethyl)-1H-indol-1-yl)methanone (1g):**

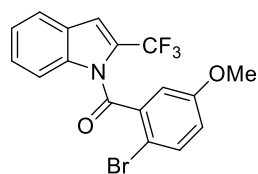

Purified by chromatography on silica gel, eluting with ethyl acetate/petroleum ether 1:100 (v/v); white solid 81% yield (for the last step); m.p. 106-108 °C. <sup>1</sup>H NMR (600 MHz, CDCl<sub>3</sub>) δ 7.64 (d, *J* = 7.8 Hz, 1H), 7.55 (d, *J* = 8.2 Hz, 1H), 7.38 (s, 1H), 7.30-7.28 (m, 2H), 7.24 (d, *J* = 7.2 Hz, 1H), 7.14 (t, *J* = 7.2 Hz, 1H), 6.46 (d, *J* = 8.0 Hz, 1H), 2.39 (s, 3H). <sup>13</sup>C NMR (100 MHz, CDCl<sub>3</sub>) δ 165.7, 138.5, 137.0, 136.3, 133.8 (d, *J* = 28.7 Hz), 130.6, 128.0 (q, *J* = 40.0 Hz), 127.3, 126.8, 123.9, 122.6, 120.7 (q, *J* = 267.0 Hz), 119.4, 117.2, 115.0 (q, *J* = 5.0 Hz), 113.9, 20.9. <sup>19</sup>F NMR (377 MHz, CDCl<sub>3</sub>) δ -58.4 ppm. HRMS *m/z* (ESI<sup>+</sup>): Calcd for C<sub>17</sub>H<sub>11</sub>BrF<sub>3</sub>NO<sub>2</sub>Na<sup>+</sup> (M+Na)<sup>+</sup> 419.9818, found 419.9818.



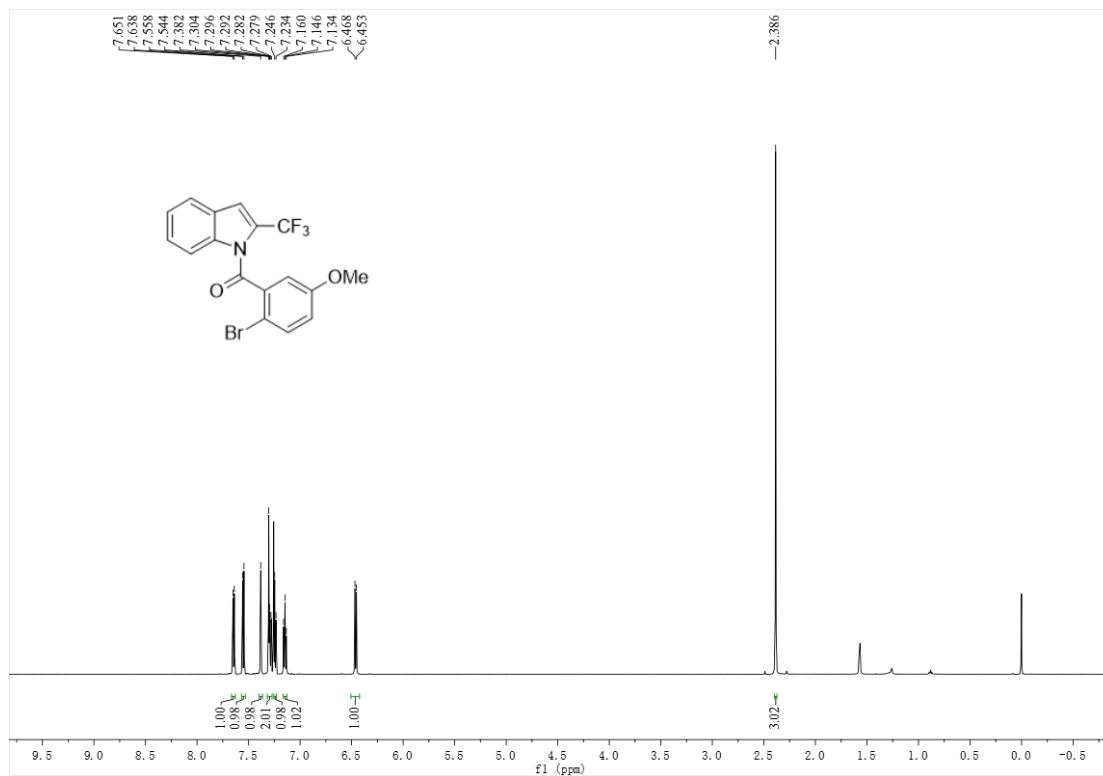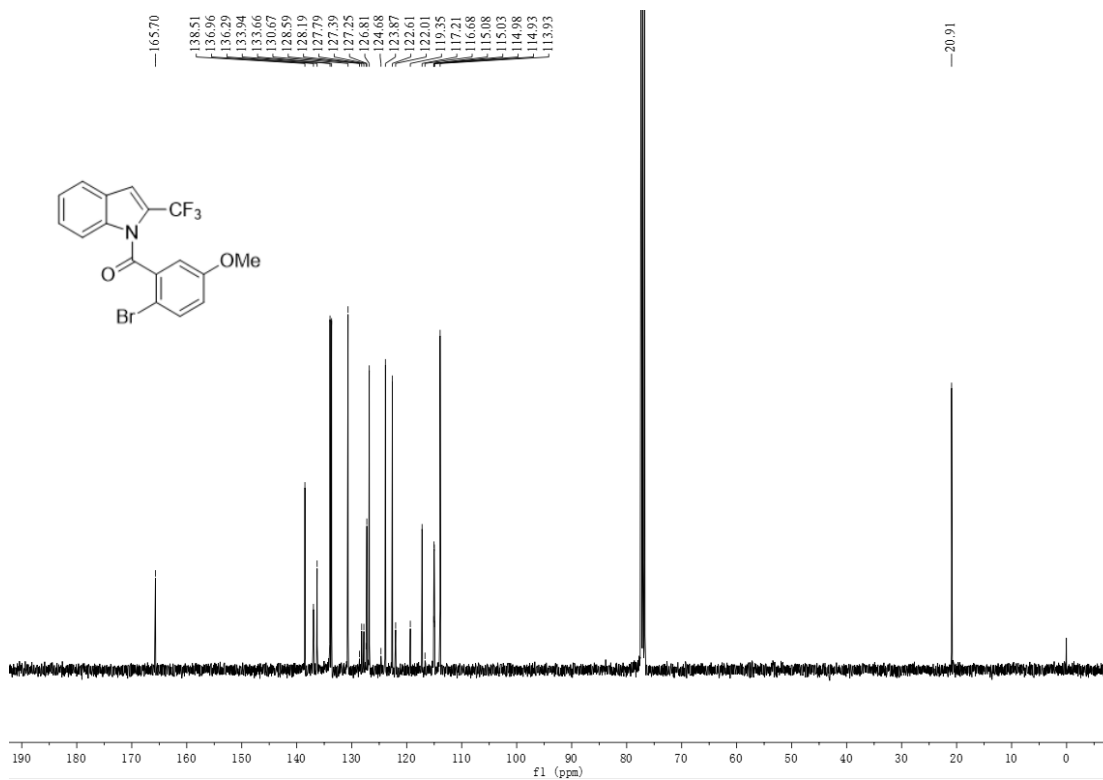

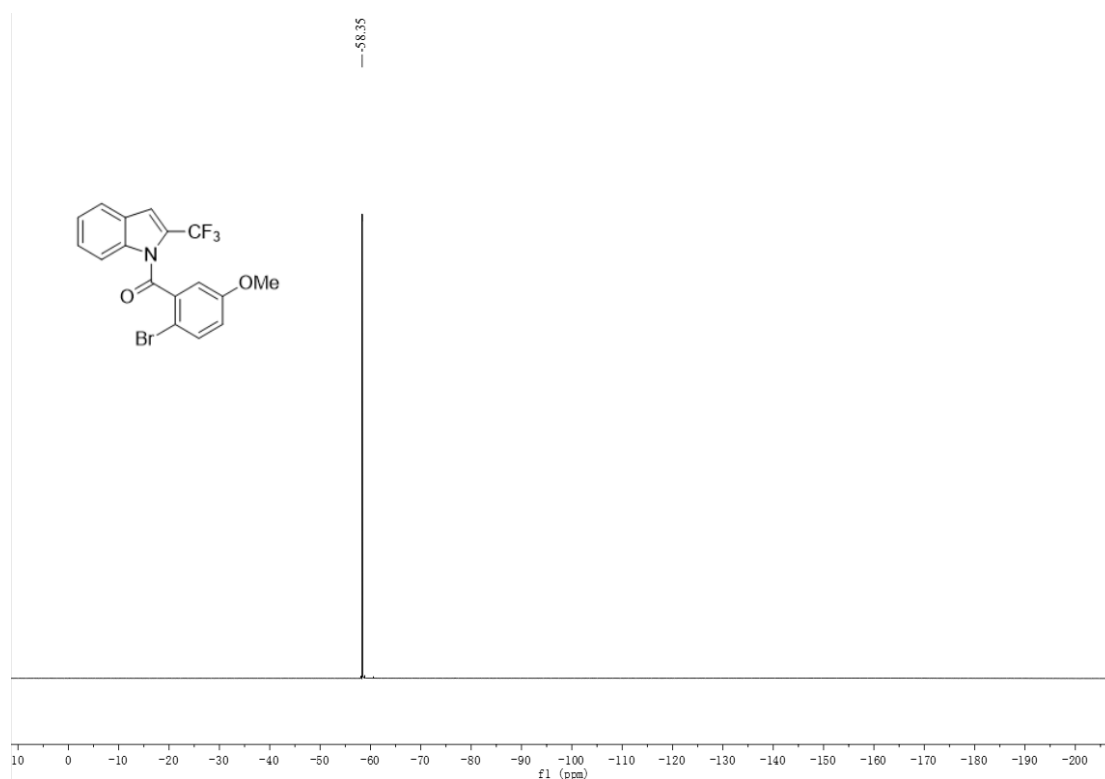

**(2-Bromo-5-methylphenyl)(2-(trifluoromethyl)-1H-indol-1-yl)methanone (1h):**

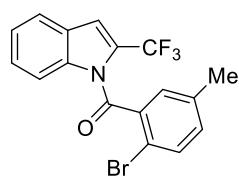

Purified by chromatography on silica gel, eluting with ethyl acetate/petroleum ether 1:100 (v/v); white solid 90% yield (for the last step); m.p. 89-91 °C. <sup>1</sup>H NMR (600 MHz, CDCl<sub>3</sub>) δ 7.64 (d, *J* = 7.8 Hz, 1H), 7.55 (d, *J* = 8.2 Hz, 1H), 7.38 (s, 1H), 7.30-7.28 (m, 2H), 7.24 (d, *J* = 7.6 Hz, 1H), 7.14 (t, *J* = 7.9 Hz, 1H), 6.46 (d, *J* = 8.8 Hz, 1H), 2.39 (s, 3H). <sup>13</sup>C NMR (100 MHz, CDCl<sub>3</sub>) δ 165.7, 138.5, 137.0, 136.3, 133.9, 133.7, 130.7, 128.0 (q, *J* = 40.0 Hz), 127.3, 126.8, 123.9, 122.6, 120.7 (q, *J* = 267.0 Hz), 117.2, 115.0 (q, *J* = 5.0 Hz), 113.9, 20.9. <sup>19</sup>F NMR (377 MHz, CDCl<sub>3</sub>) δ -58.4 ppm. HRMS *m/z* (ESI<sup>+</sup>): Calcd for C<sub>17</sub>H<sub>11</sub>BrF<sub>3</sub>NONa<sup>+</sup> (M+Na)<sup>+</sup> 403.9868, found 403.9870.

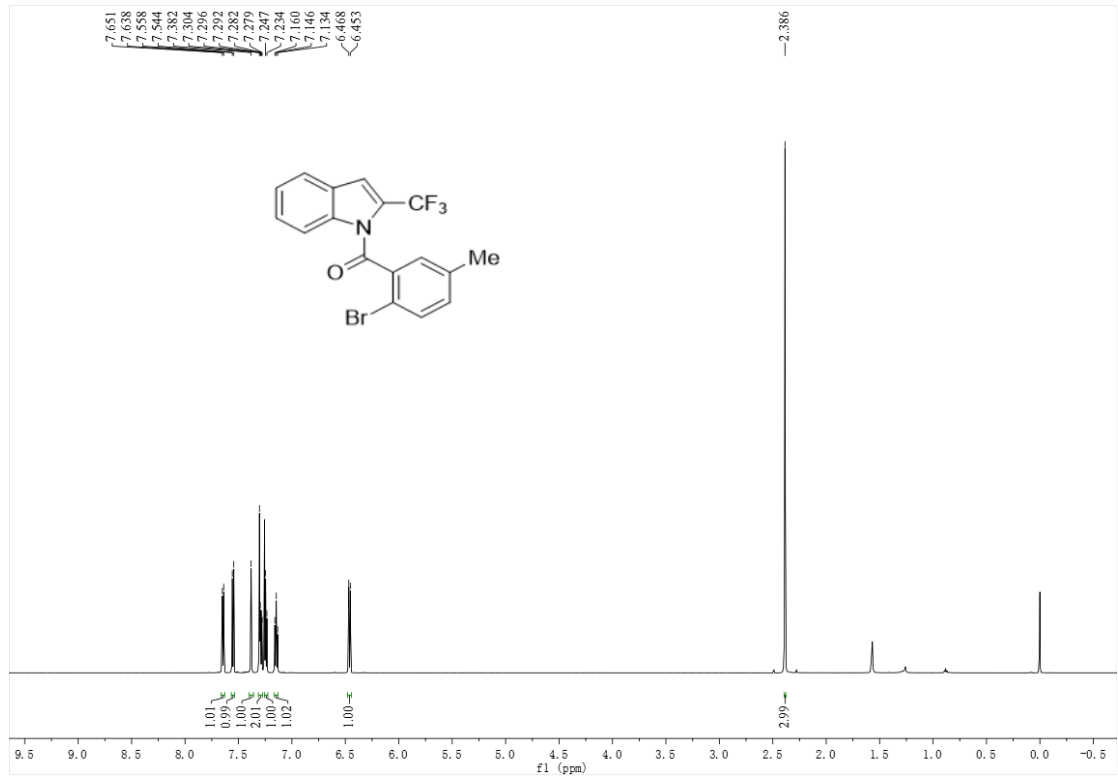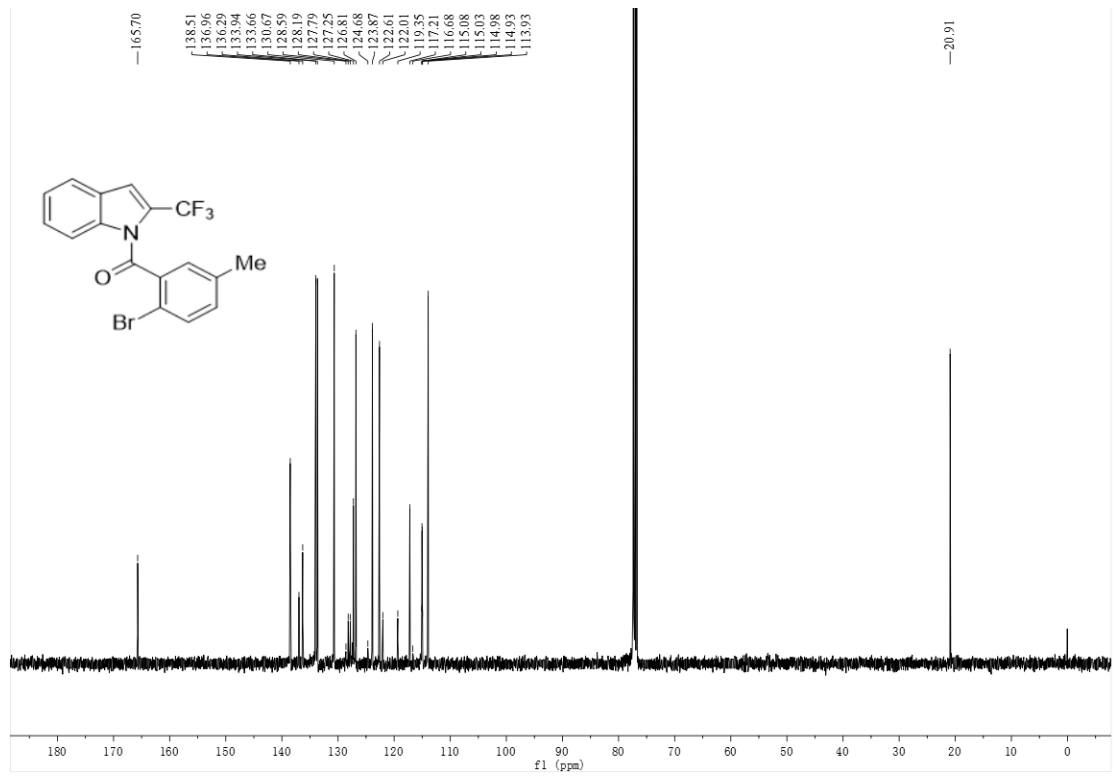

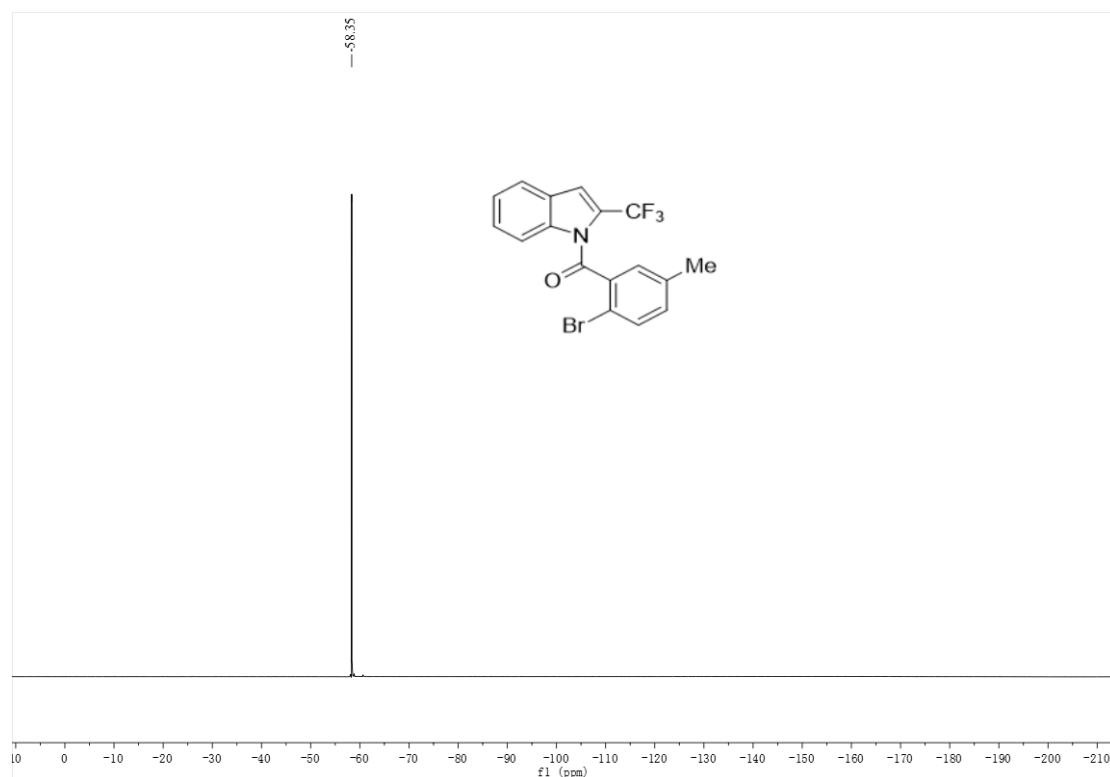

**(2-Bromo-5-chlorophenyl)(2-(trifluoromethyl)-1H-indol-1-yl)methanone (1i):**

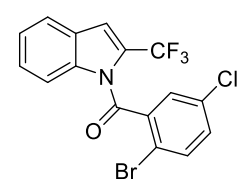

Purified by chromatography on silica gel, eluting with ethyl acetate/petroleum ether 1:100 (v/v); white solid 79% yield (for the last step); m.p. 105-107 °C. <sup>1</sup>H NMR (600 MHz, CDCl<sub>3</sub>) δ 7.66 (d, *J* = 7.8 Hz, 1H), 7.62 (d, *J* = 8.6 Hz, 1H), 7.55 (d, *J* = 2.5 Hz, 1H), 7.45 (dd, *J* = 8.6, 2.5 Hz, 1H), 7.32 (s, 1H), 7.28 (t, *J* = 7.5 Hz, 1H), 7.21 (t, *J* = 7.9 Hz, 1H), 6.59 (d, *J* = 8.6 Hz, 1H). <sup>13</sup>C NMR (150 MHz, CDCl<sub>3</sub>) δ 164.2, 137.9, 136.9, 135.0, 134.4, 133.0, 130.1, 127.9 (q, *J* = 40.5 Hz), 127.3, 127.1, 124.2, 122.8, 120.5 (q, *J* = 267.0 Hz) 118.6, 115.5 (q, *J* = 4.5 Hz), 113.8. <sup>19</sup>F NMR (377 MHz, CDCl<sub>3</sub>) δ -58.3 ppm. HRMS *m/z* (ESI<sup>+</sup>): Calcd for C<sub>16</sub>H<sub>8</sub>BrClF<sub>3</sub>NONa<sup>+</sup> (M+Na)<sup>+</sup> 423.9322, found 423.9321.

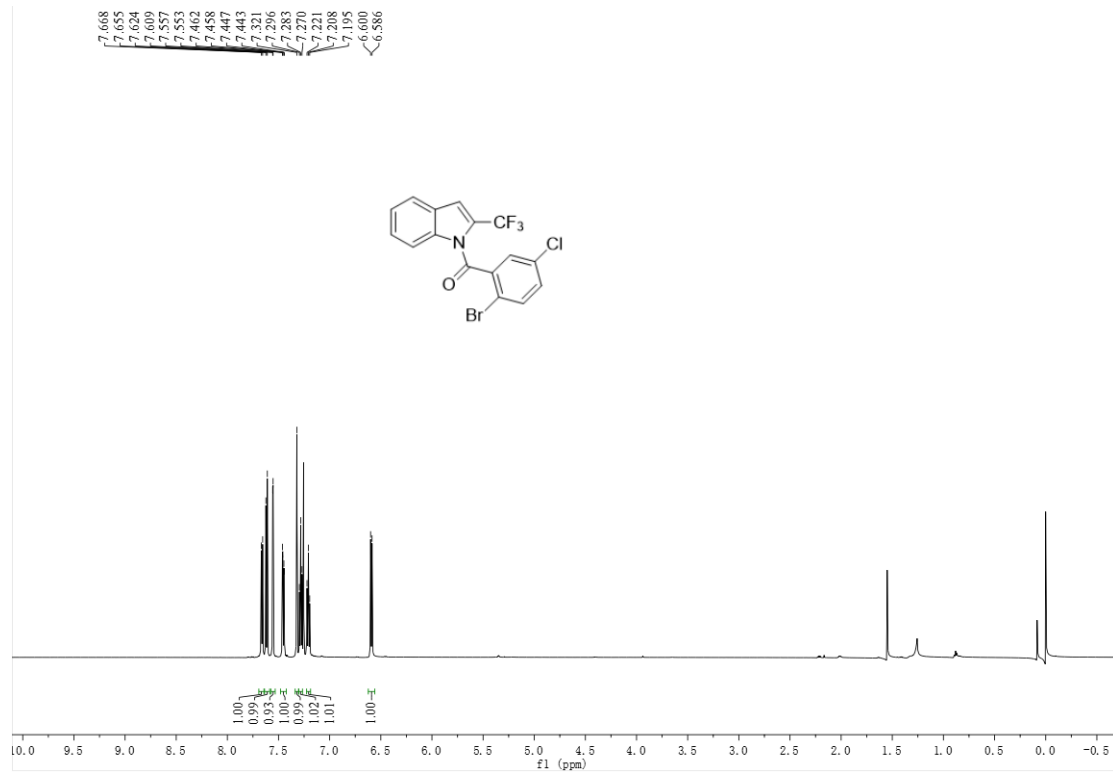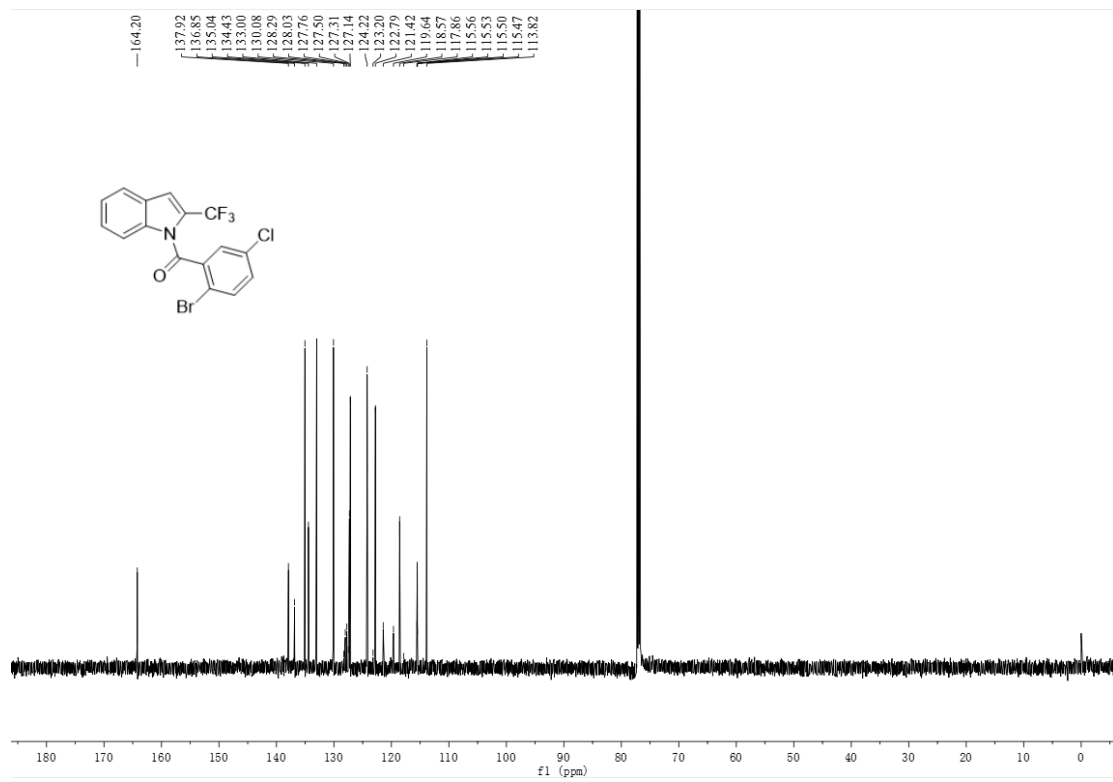

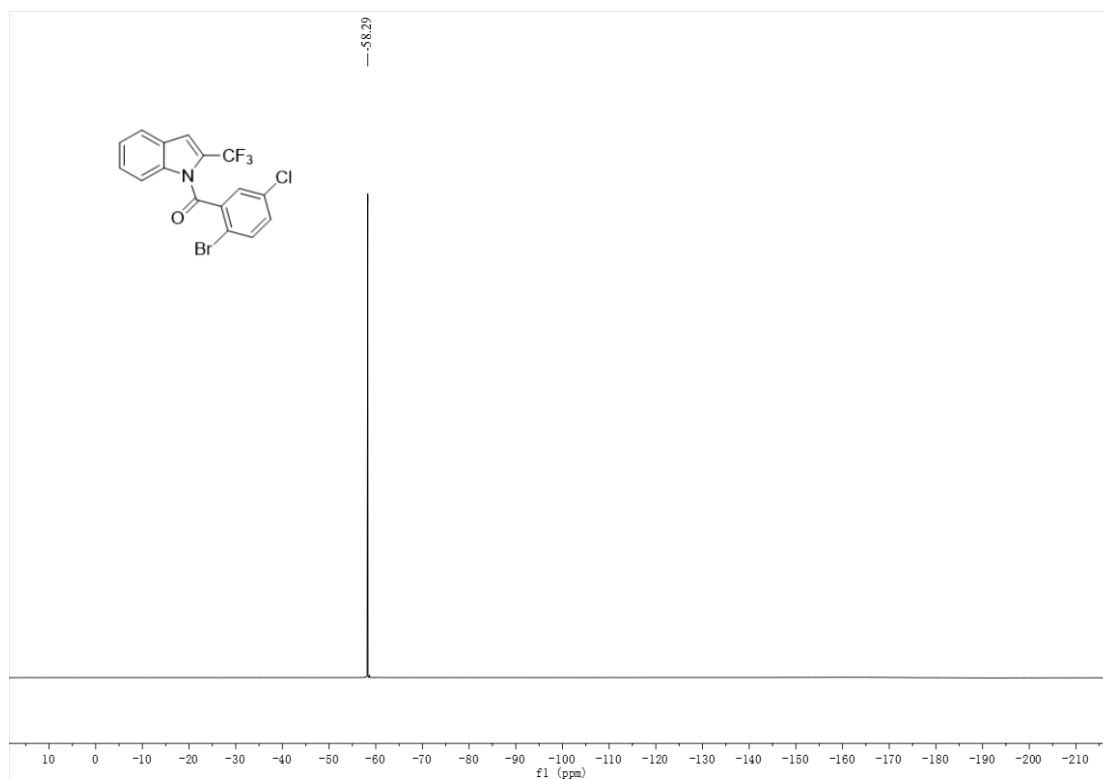

**(2-Bromo-5-fluorophenyl)(2-(trifluoromethyl)-1H-indol-1-yl)methanone (1j):**

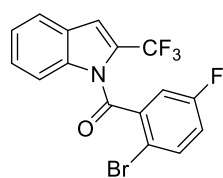

Purified by chromatography on silica gel, eluting with ethyl acetate/petroleum ether 1:100 (v/v); white solid 70% yield (for the last step); m.p. 53-55 °C.  $^1\text{H}$  NMR (600 MHz,  $\text{CDCl}_3$ )  $\delta$  7.67-7.64 (m, 2H), 7.32-7.30 (m, 2H), 7.28 (t,  $J = 7.5$  Hz, 1H), 7.23-7.18 (m, 2H), 6.56 (d,  $J = 8.6$  Hz, 1H).  $^{13}\text{C}$  NMR (100 MHz,  $\text{CDCl}_3$ )  $\delta$  164.3, 161.9 (d,  $J = 250.0$  Hz), 137.9 (d,  $J = 7.0$  Hz), 136.8, 135.6 (d,  $J = 8.0$  Hz), 127.9 (d,  $J = 39.0$  Hz), 127.3, 127.1, 124.2, 122.8, 120.5 (q,  $J = 267.0$  Hz), 120.4 (d,  $J = 22.0$  Hz), 117.6 (d,  $J = 24.0$  Hz), 115.6 (q,  $J = 5.0$  Hz), 115.0 (d,  $J = 3.0$  Hz), 113.8.  $^{19}\text{F}$  NMR (377 MHz,  $\text{CDCl}_3$ )  $\delta$  -58.4, -111.9 ppm. HRMS  $m/z$  (ESI+): Calcd for  $\text{C}_{16}\text{H}_8\text{BrF}_4\text{NONa}^+$  ( $\text{M}+\text{Na}$ ) $^+$  407.9618, found 407.9621.

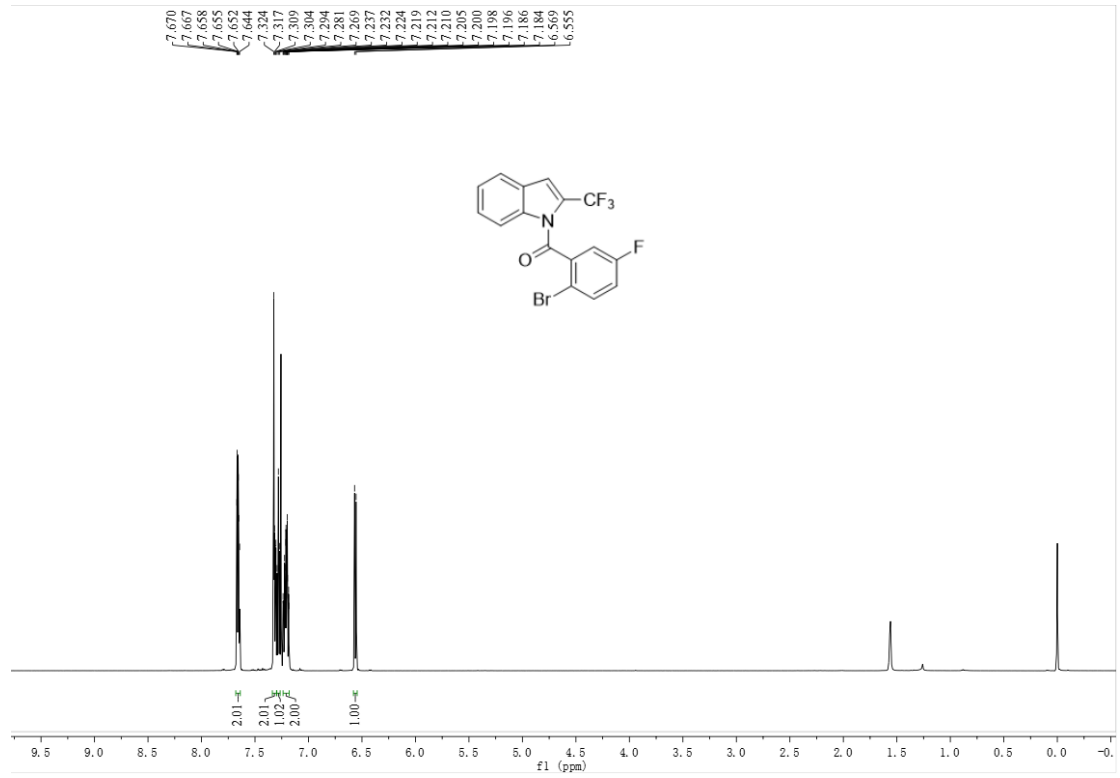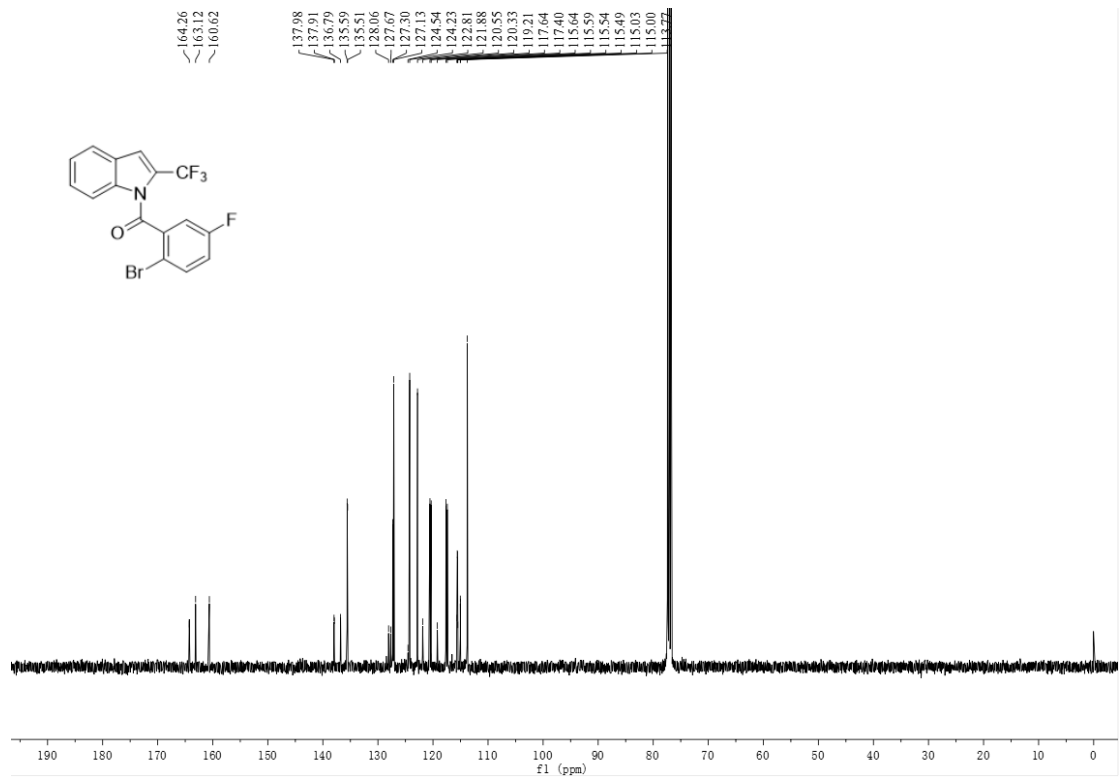

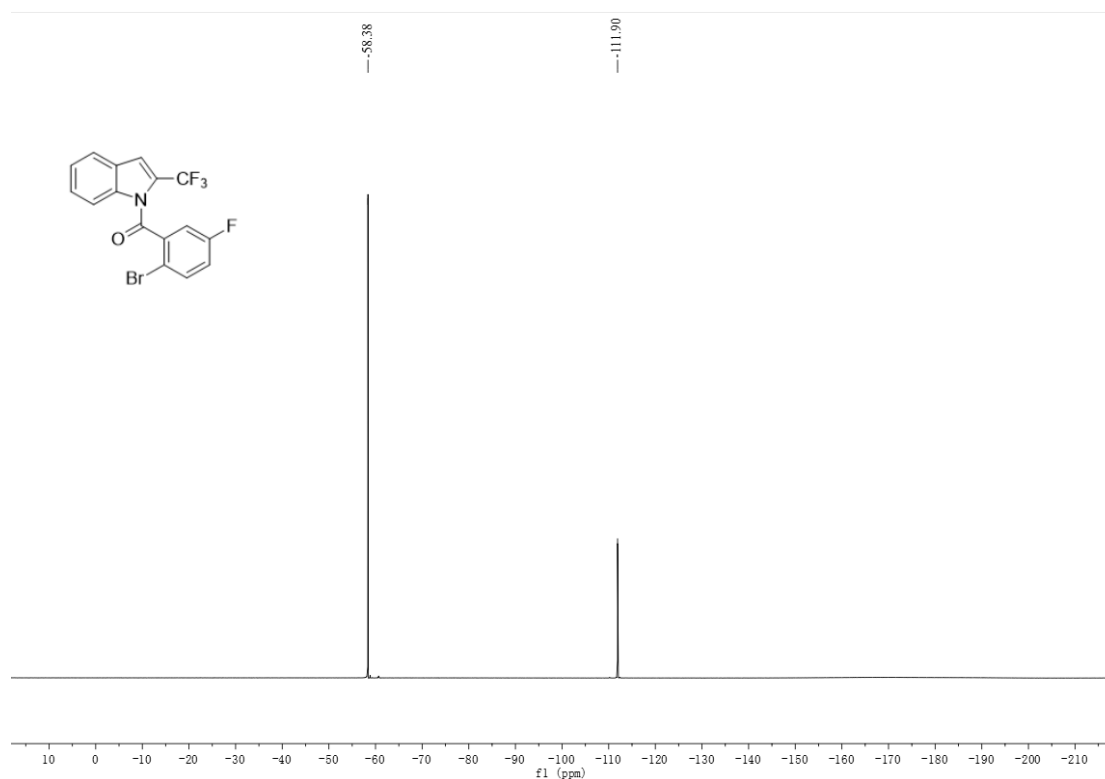

**(2-Bromo-6-fluorophenyl)(2-(trifluoromethyl)-1H-indol-1-yl)methanone (1k):**

Purified by chromatography on silica gel, eluting with ethyl acetate/petroleum ether 1:100 (v/v); white solid 64% yield (for the last step); m.p. 94-96 °C. <sup>1</sup>H NMR (400 MHz, CDCl<sub>3</sub>) δ 7.67-7.65 (m, 1H), 7.51 (dd, *J* = 8.2, 1.0 Hz, 1H), 7.45 (td, *J* = 8.1, 5.6 Hz, 1H), 7.32-7.27 (m, 2H), 7.24-7.19 (m, 2H), 6.80 (d, *J* = 7.3 Hz, 1H). <sup>13</sup>C NMR (100 MHz, CDCl<sub>3</sub>) δ 160.8, 159.9 (d, *J* = 255.0 Hz), 136.8, 133.4 (d, *J* = 9.0 Hz), 129.2 (d, *J* = 4.0 Hz), 127.9, 127.4 (d, *J* = 4.0 Hz), 126.3, 126.1, 124.4, 122.8, 121.1 (d, *J* = 3.0 Hz), 120.5 (q, *J* = 267.0 Hz), 116.5 (q, *J* = 5.0 Hz), 115.5 (d, *J* = 21.0 Hz), 113.7. <sup>19</sup>F NMR (377 MHz, CDCl<sub>3</sub>) δ -58.5, -110.9 ppm. HRMS *m/z* (ESI<sup>+</sup>): Calcd for C<sub>16</sub>H<sub>8</sub>BrF<sub>4</sub>NONa<sup>+</sup> (M+Na)<sup>+</sup> 407.9618, found 407.9621.



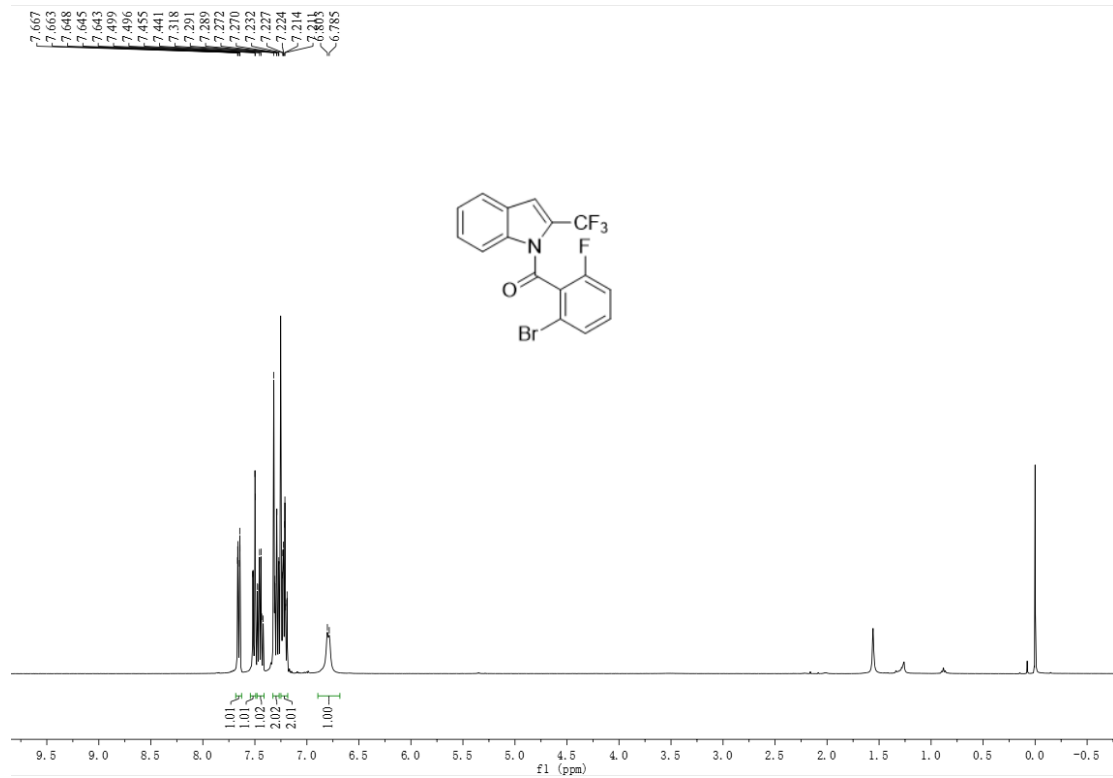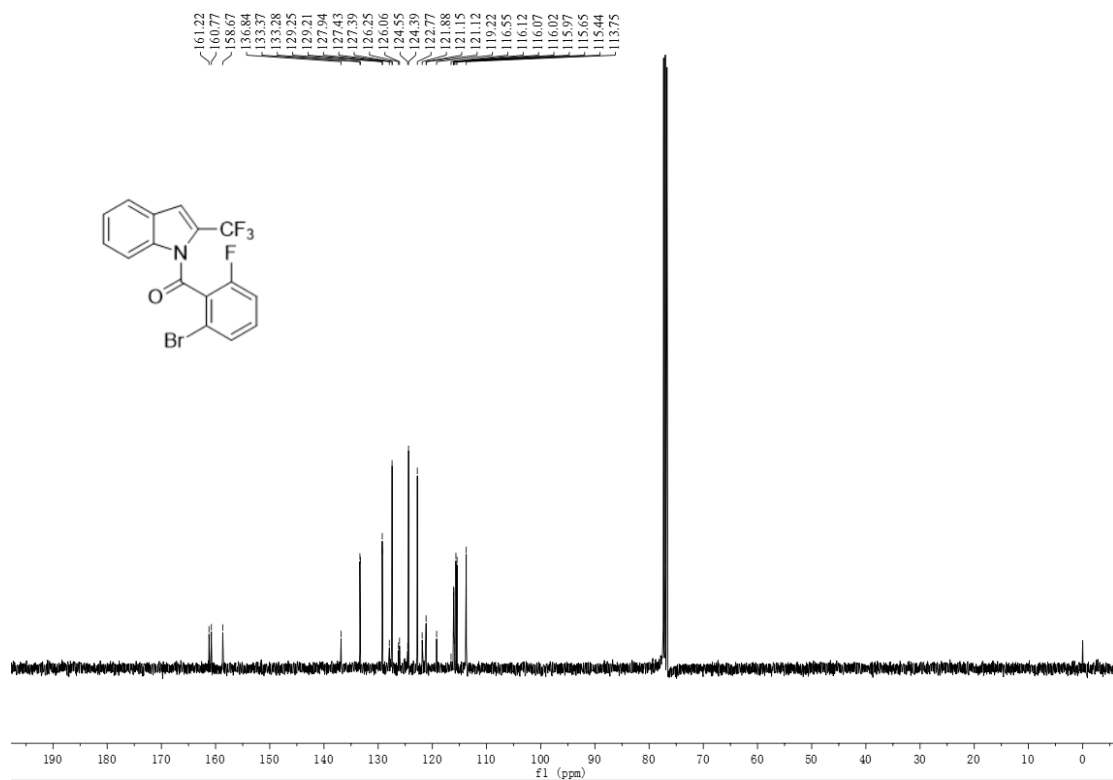

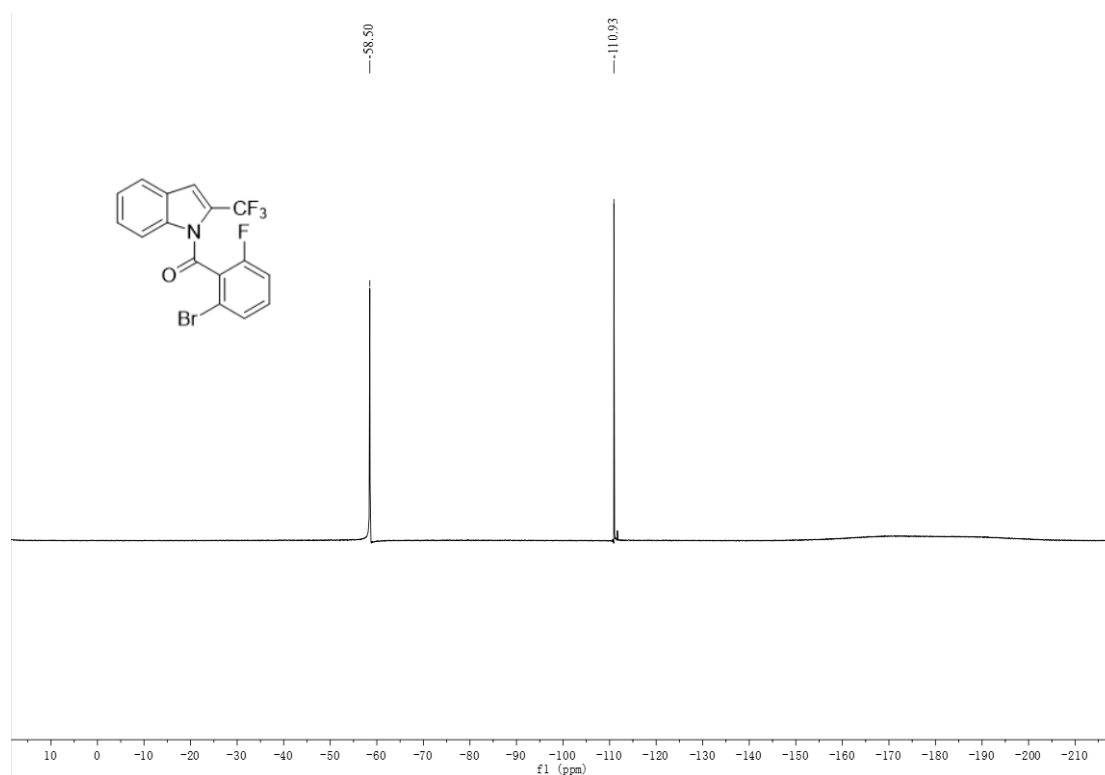

**(2-Bromo-6-chlorophenyl)(2-(trifluoromethyl)-1H-indol-1-yl)methanone (11):**

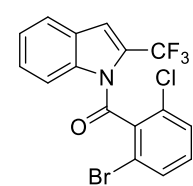

Purified by chromatography on silica gel, eluting with ethyl acetate/petroleum ether 1:100 (v/v); white solid 66% yield (for the last step); m.p. 77-79 °C. <sup>1</sup>H NMR (600 MHz, CDCl<sub>3</sub>) δ 7.66 (d, *J* = 8.2 Hz, 2H), 7.51 (d, *J* = 6.9 Hz, 1H), 7.38 (d, *J* = 29.1 Hz, 2H), 7.27 (d, *J* = 14.0 Hz, 1H), 7.14 (s, 1H), 6.20 (s, 1H). <sup>13</sup>C NMR (150 MHz, CDCl<sub>3</sub>) δ 161.8, 159.0, 136.7, 136.10, 132.5 (d, *J* = 4.5 Hz), 131.9, 131.2, 129.3, 128.6, 127.7 (d, *J* = 4.0 Hz), 124.3, 122.9, 120.7 (q, *J* = 267 Hz), 116.4, 115.0 (q, *J* = 4.5 Hz), 112.9. <sup>19</sup>F NMR (377 MHz, CDCl<sub>3</sub>) δ -59.2 ppm. HRMS *m/z* (ESI<sup>+</sup>): Calcd for C<sub>16</sub>H<sub>8</sub>BrClF<sub>3</sub>NONa<sup>+</sup> (M+Na)<sup>+</sup> 423.9322, found 423.9321.

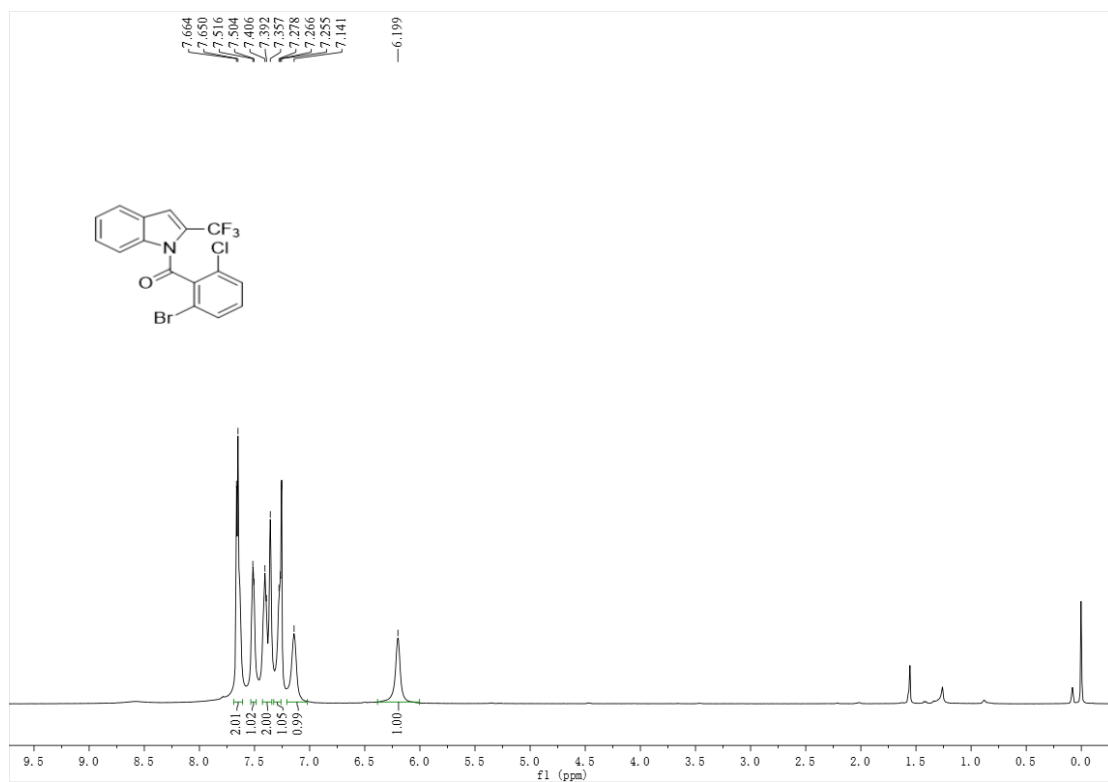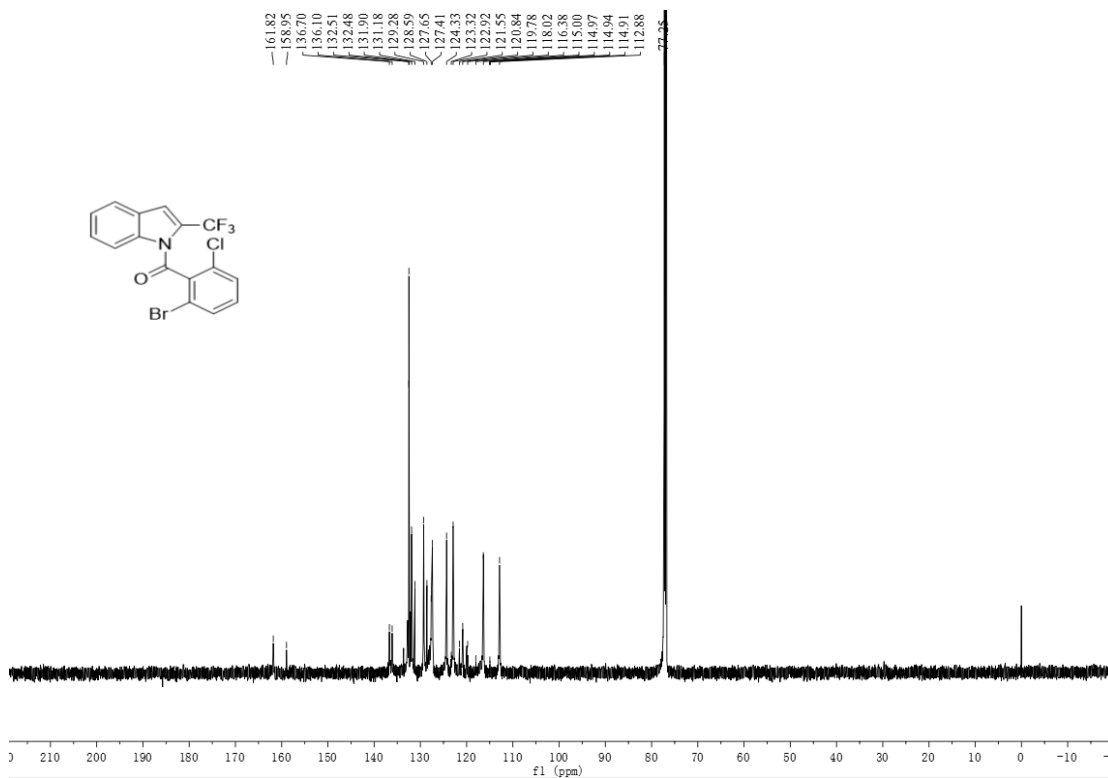

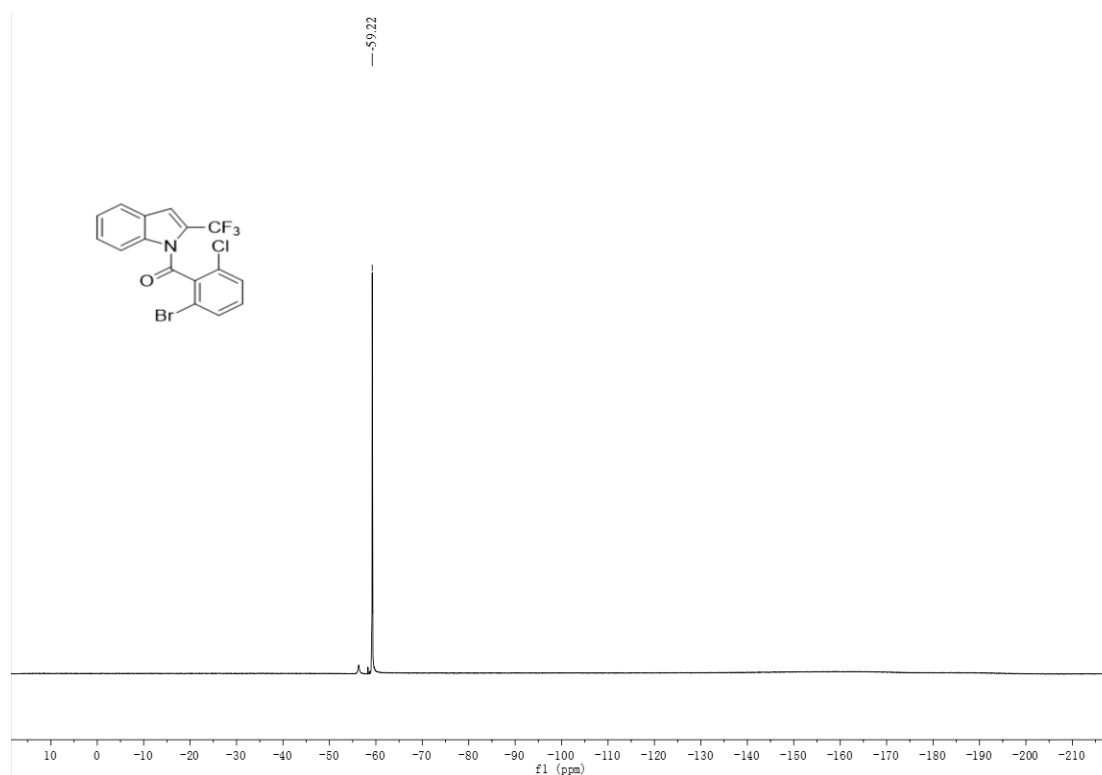

**(2-Bromo-4,5-dimethoxyphenyl)(2-(trifluoromethyl)-1H-indol-1-yl)methanone**

**(1m):**

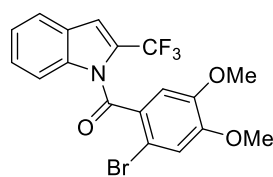

Purified by chromatography on silica gel, eluting with ethyl acetate/petroleum ether 1:100 (v/v); white solid 75% yield (for the last step); m.p. 115-117 °C. <sup>1</sup>H NMR (400 MHz, CDCl<sub>3</sub>) δ 7.64 (d, *J* = 7.8 Hz, 1H), 7.29 (s, 1H), 7.24 (dd, *J* = 7.8, 0.9 Hz, 1H), 7.17 (t, *J* = 7.4 Hz, 1H), 7.08 (d, *J* = 4.8 Hz, 2H), 6.57 (d, *J* = 8.5 Hz, 1H), 3.97 (s, 3H), 3.87 (s, 3H). <sup>13</sup>C NMR (100 MHz, CDCl<sub>3</sub>) δ 165.6, 152.4, 149.0, 137.1, 128.0 (q, *J* = 40.0 Hz), 127.98, 127.2, 126.7, 123.7, 122.5, 120.7 (q, *J* = 267.0 Hz), 116.3, 114.4 (q, *J* = 5.0 Hz), 113.8, 113.0, 112.7, 56.5, 56.4. <sup>19</sup>F NMR (377 MHz, CDCl<sub>3</sub>) δ -58.2 ppm. HRMS *m/z* (ESI<sup>+</sup>): Calcd for C<sub>18</sub>H<sub>14</sub>BrF<sub>3</sub>NO<sub>3</sub><sup>+</sup> (M+H)<sup>+</sup> 428.0104, found 428.0108.

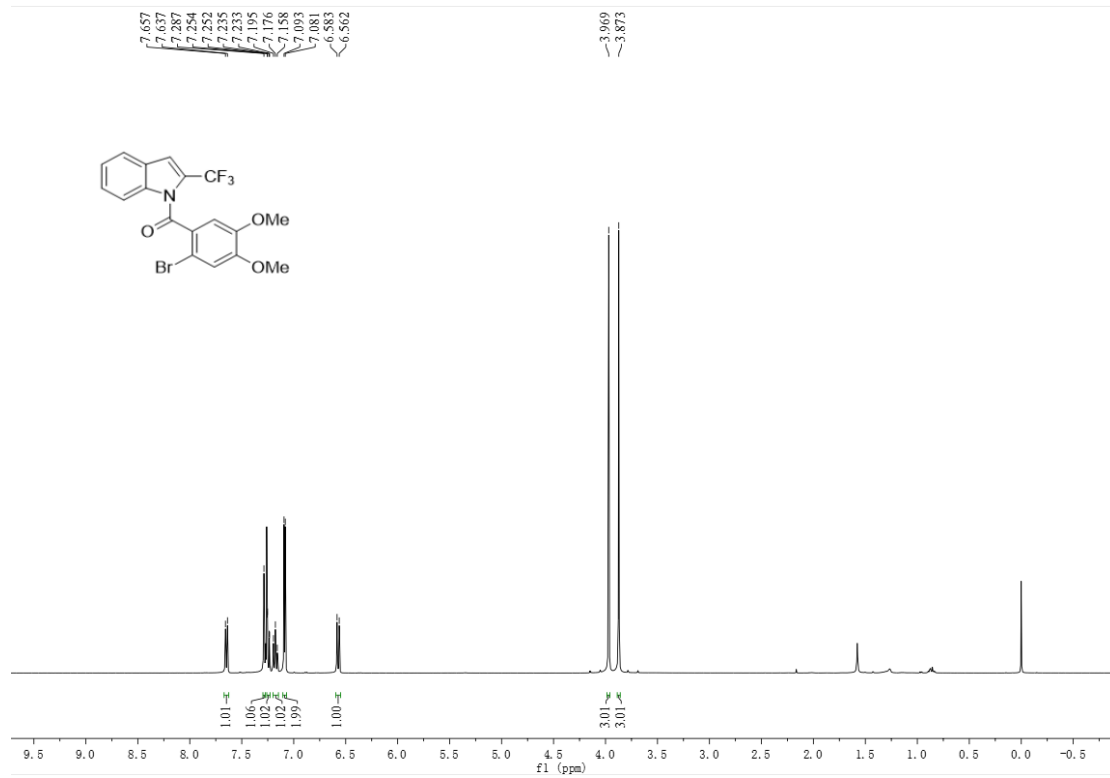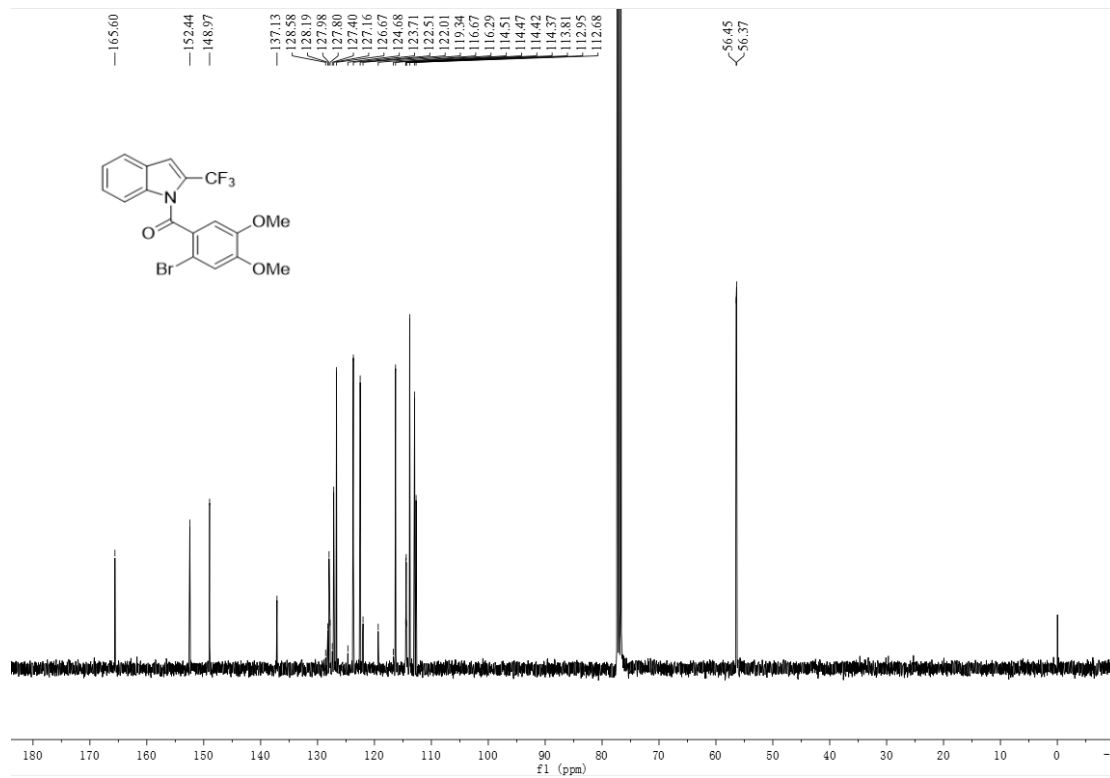

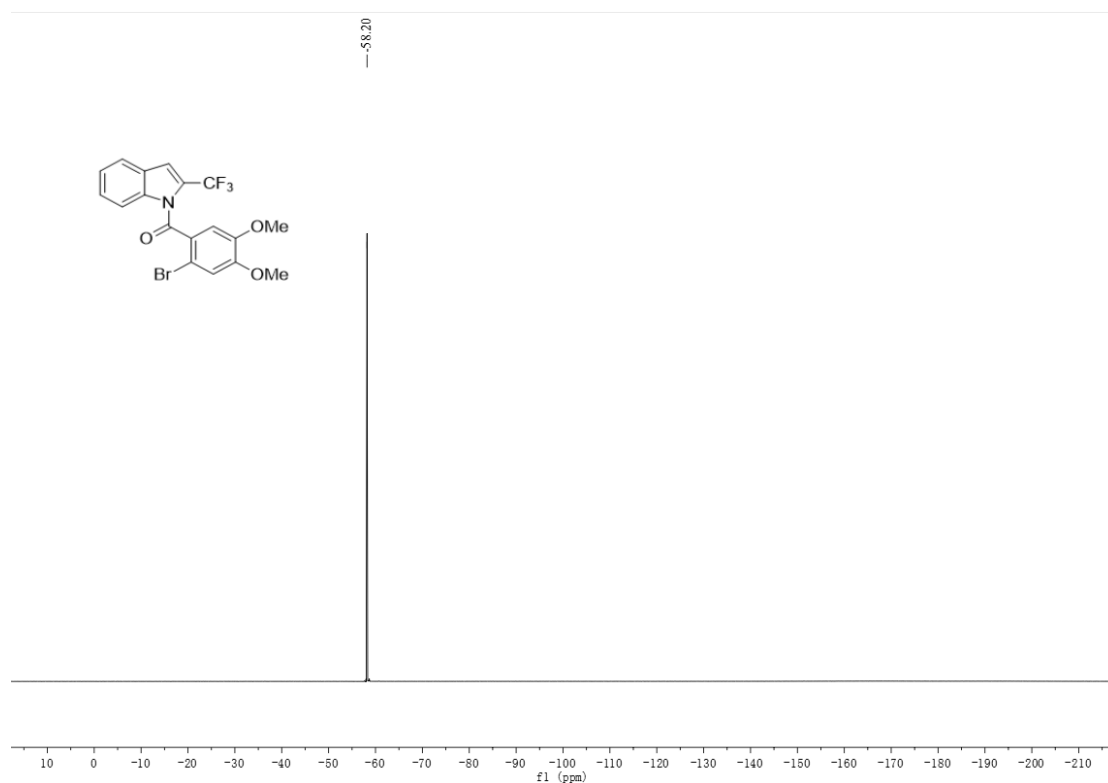

**(2-Bromo-4,5-difluorophenyl)(2-(trifluoromethyl)-1H-indol-1-yl)methanone (1n):**

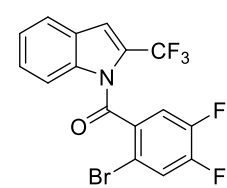

Purified by chromatography on silica gel, eluting with ethyl acetate/petroleum ether 1:100 (v/v); white solid 59% yield (for the last step); m.p. 98-100 °C. <sup>1</sup>H NMR (600 MHz, CDCl<sub>3</sub>) δ 7.67 (d, *J* = 7.8 Hz, 1H), 7.53 (t, *J* = 8.0 Hz, 1H), 7.45 (t, *J* = 8.5 Hz, 1H), 7.30 (t, *J* = 7.8 Hz, 2H), 7.26-7.23 (m, 1H), 6.68 (d, *J* = 8.5 Hz, 1H). <sup>13</sup>C NMR (150 MHz, CDCl<sub>3</sub>) δ 163.7, 152.1 (dd, *J* = 259.5, 12.0 Hz), 149.9 (dd, *J* = 265.5, 12.0 Hz), 136.9, 133.0 (d, *J* = 4.5 Hz), 127.8 (q, *J* = 39.0 Hz), 127.3, 127.2, 124.3, 123.3, 123.1, 122.9, 120.5 (q, *J* = 267.0 Hz), 119.5 (d, *J* = 21.0 Hz), 115.5 (q, *J* = 4.5 Hz), 113.7. <sup>19</sup>F NMR (377 MHz, CDCl<sub>3</sub>) δ -58.2, -127.9, -135.3 ppm. HRMS *m/z* (ESI<sup>+</sup>): calcd for C<sub>16</sub>H<sub>7</sub>BrF<sub>5</sub>NONa<sup>+</sup> (M+Na)<sup>+</sup> 425.9523, found 425.9522.

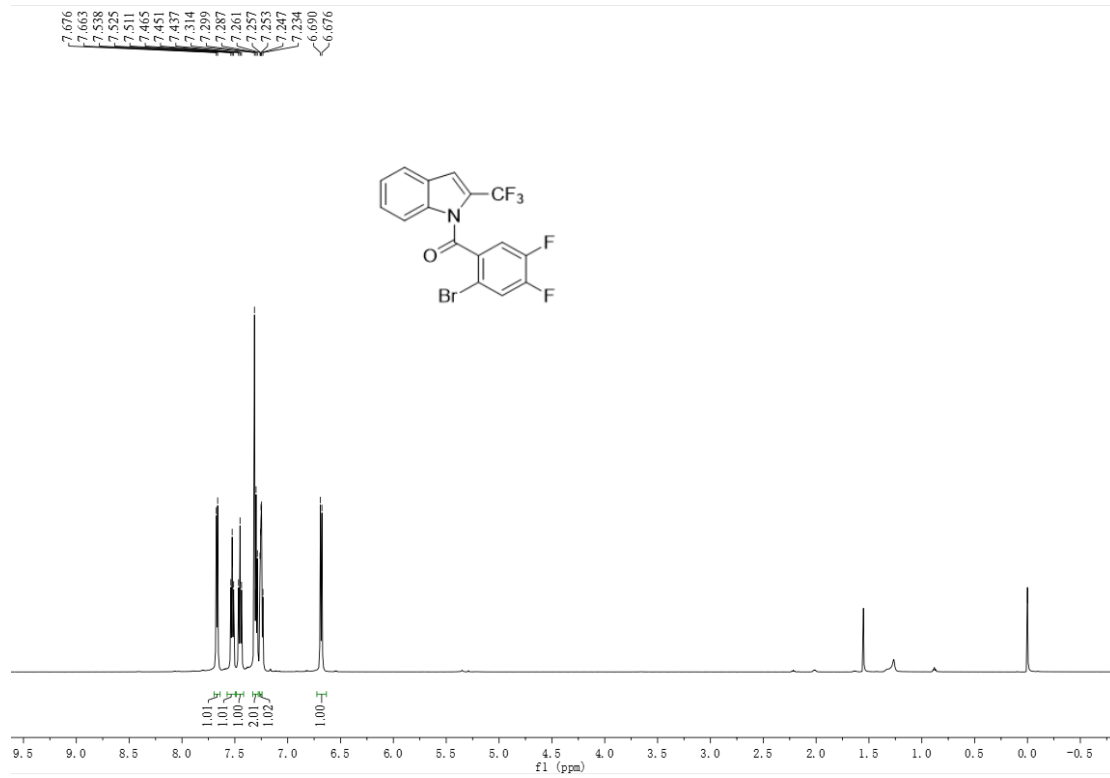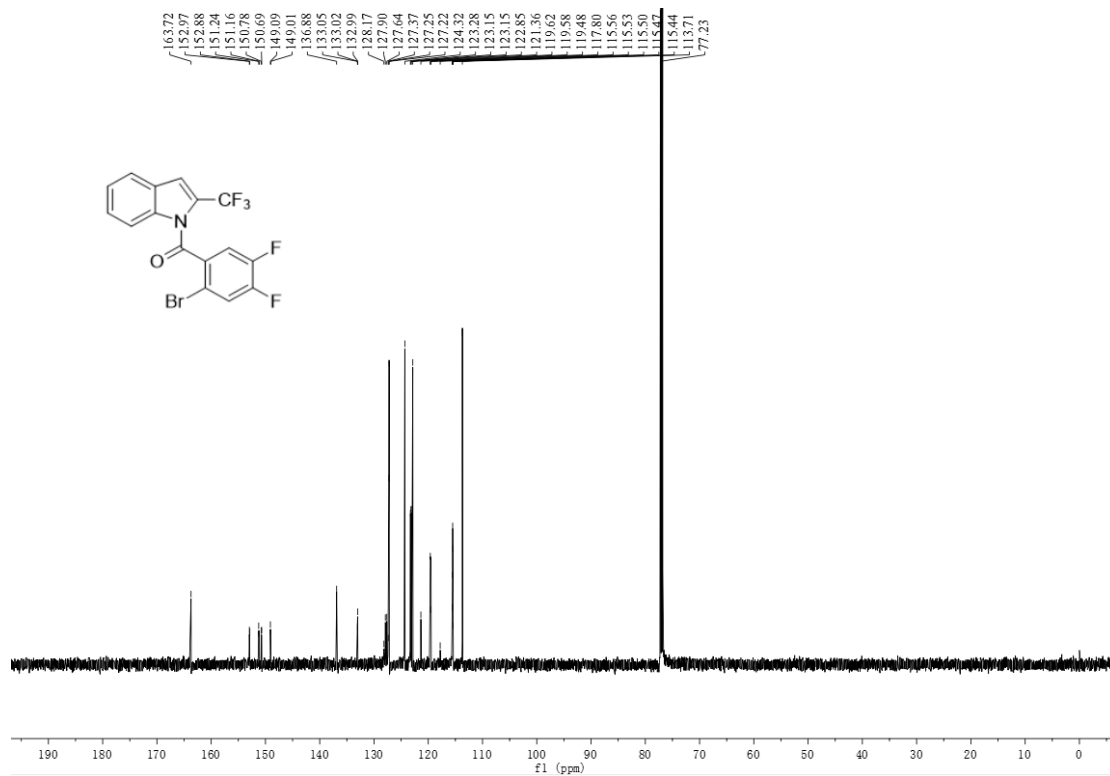

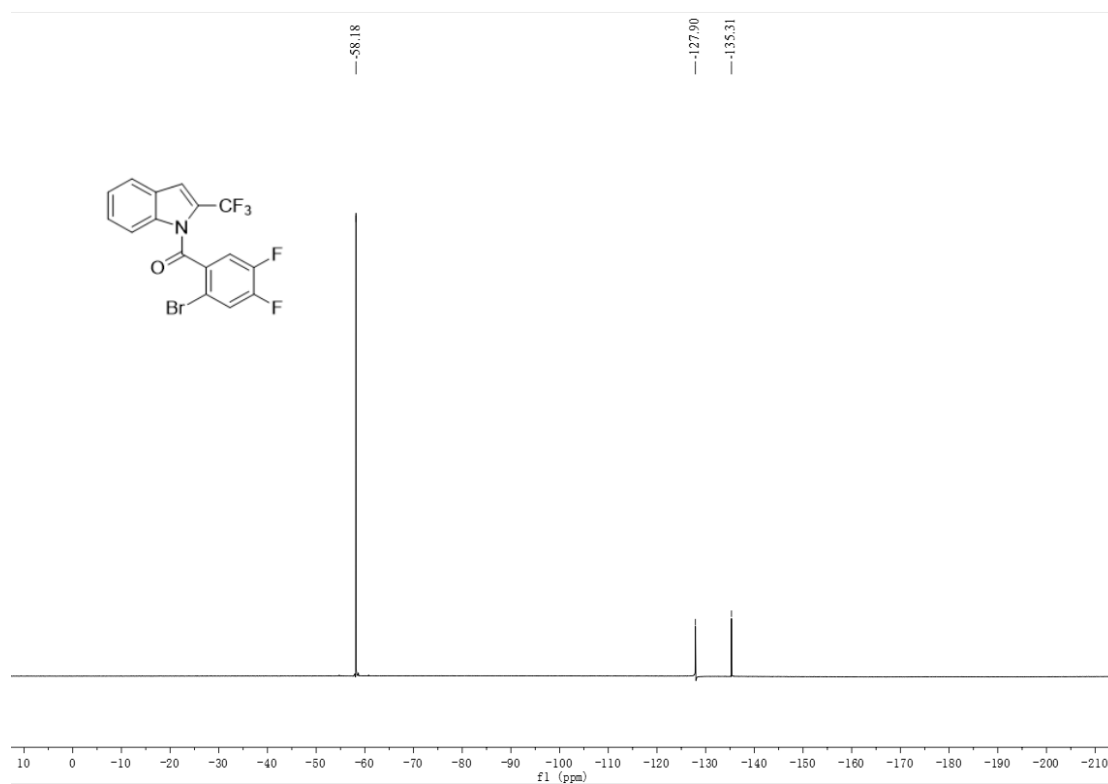

**(1-Bromonaphthyl)(2-(trifluoromethyl)-1H-indol-1-yl)methanone (1o):**

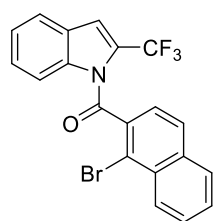

Purified by chromatography on silica gel, eluting with ethyl acetate/petroleum ether 1:100 (v/v); reddish brown liquid 49% yield (for the last step). <sup>1</sup>H NMR (600 MHz, CDCl<sub>3</sub>) δ 8.30 (s, 1H), 7.92 (d, *J* = 29.7 Hz, 2H), 7.65-7.52 (m, 4H), 7.32 (s, 1H), 7.17 (s, 1H), 6.98 (s, 1H), 6.35 (t, *J* = 6.0 Hz, 1H). <sup>13</sup>C NMR (150 MHz, CDCl<sub>3</sub>) δ 166.1, 136.9, 135.2, 134.5, 132.0, 129.1, 128.8, 128.7, 128.6, 128.2 (q, *J* = 39.0 Hz), 128.1, 127.3, 127.0, 125.0, 124.0, 122.6, 122.0, 120.8 (q, *J* = 266.0 Hz), 115.4 (q, *J* = 4.5 Hz), 114.0. <sup>19</sup>F NMR (377 MHz, CDCl<sub>3</sub>) δ -58.0 ppm. HRMS *m/z* (ESI<sup>+</sup>): Calcd for C<sub>20</sub>H<sub>11</sub>BrF<sub>3</sub>NONa<sup>+</sup> (M+Na)<sup>+</sup> 439.9868, found 439.9871.



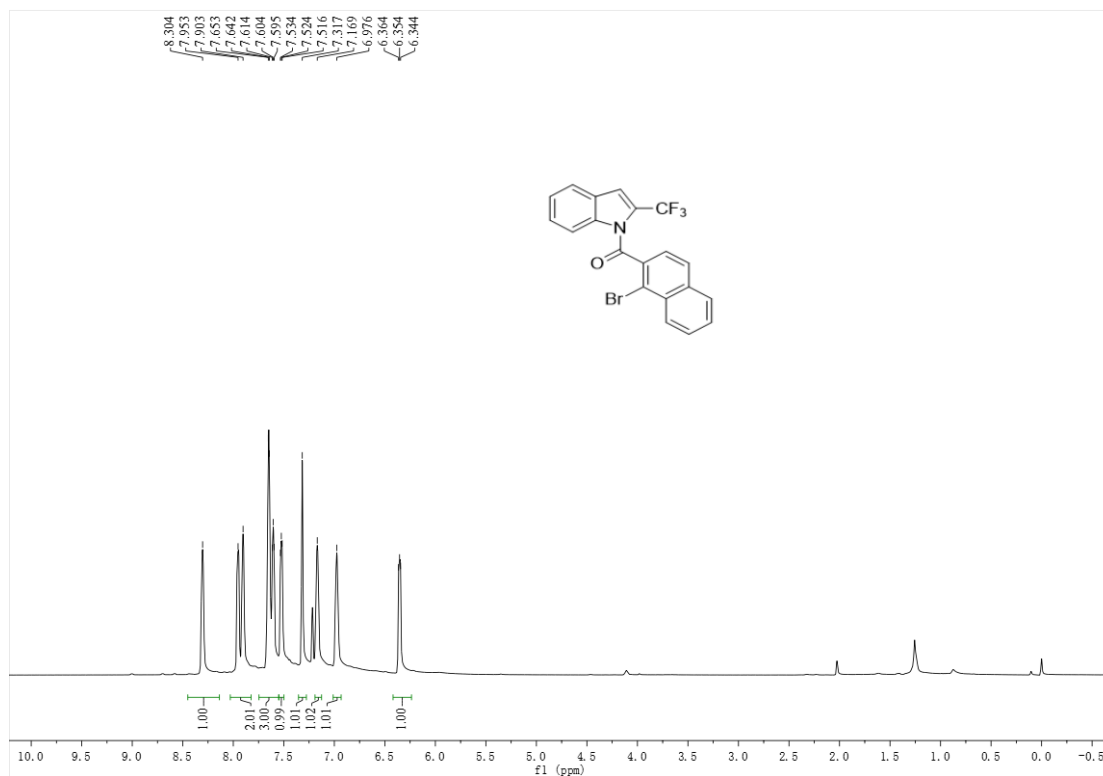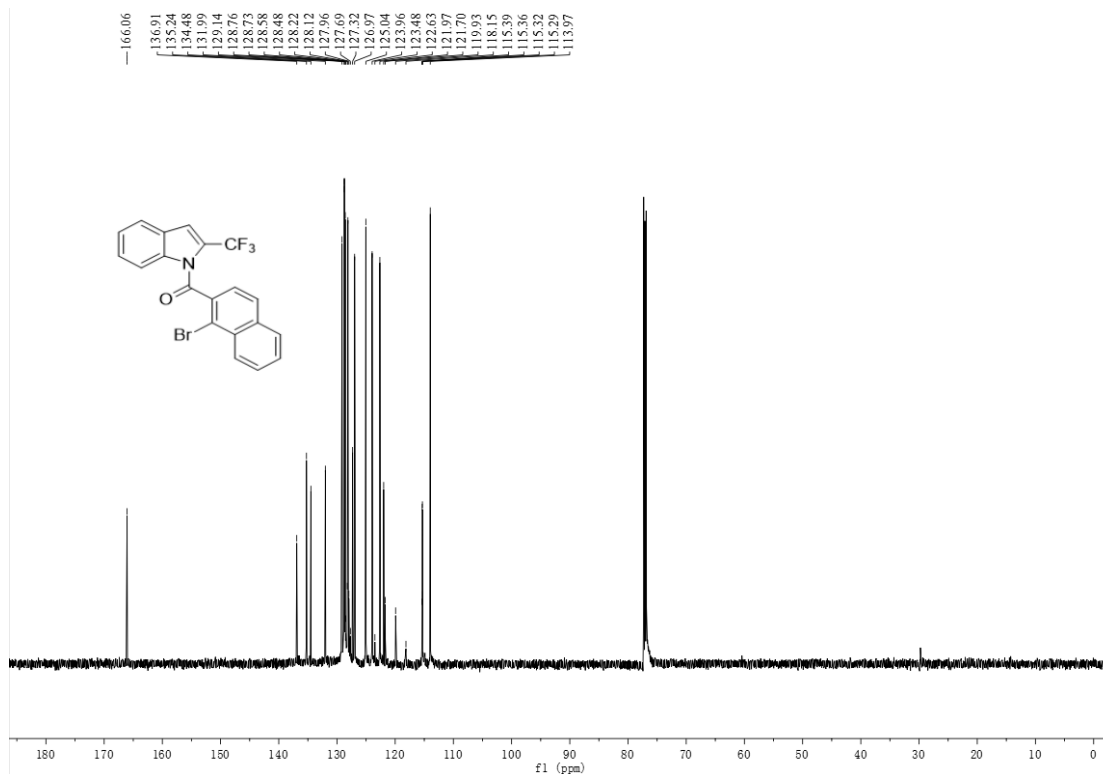

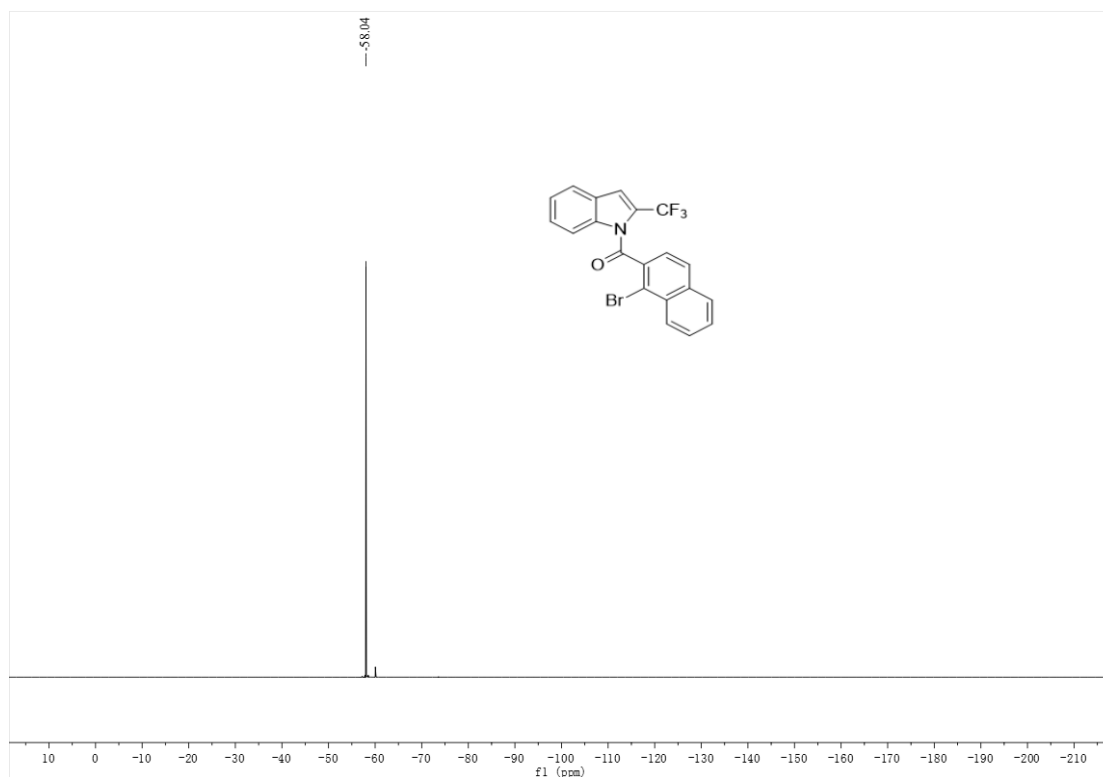

**(2-Bromophenyl)(6-methoxy-2-(trifluoromethyl)-1H-indol-1-yl)methanone (1p):**

Purified by chromatography on silica gel, eluting with ethyl acetate/petroleum ether 1:100 (v/v); reddish brown solid 45% yield (for the last step); m.p. 116-118 °C. <sup>1</sup>H NMR (400 MHz, CDCl<sub>3</sub>) δ 7.71 (d, *J* = 7.8 Hz, 1H), 7.59 (dd, *J* = 7.5, 1.9 Hz, 1H), 7.55-7.46 (m, 3H), 7.23 (s, 1H), 6.87 (dd, *J* = 8.7, 2.2 Hz, 1H), 5.97 (d, *J* = 2.1 Hz, 1H), 3.48 (s, 3H). <sup>13</sup>C NMR (100 MHz, CDCl<sub>3</sub>) δ 165.5, 159.3, 138.2, 136.9, 133.8, 132.8, 130.1, 128.1, 126.7, 123.1, 121.0, 120.7 (q, *J* = 267.7 Hz), 120.69, 115.2 (q, *J* = 5.0 Hz), 113.6, 98.0, 55.1. <sup>19</sup>F NMR (376 MHz, CDCl<sub>3</sub>) δ -58.0 ppm. Calcd for C<sub>17</sub>H<sub>11</sub>BrF<sub>3</sub>NO<sub>2</sub>Na<sup>+</sup> (M+Na)<sup>+</sup> 419.9818, found 419.9818.

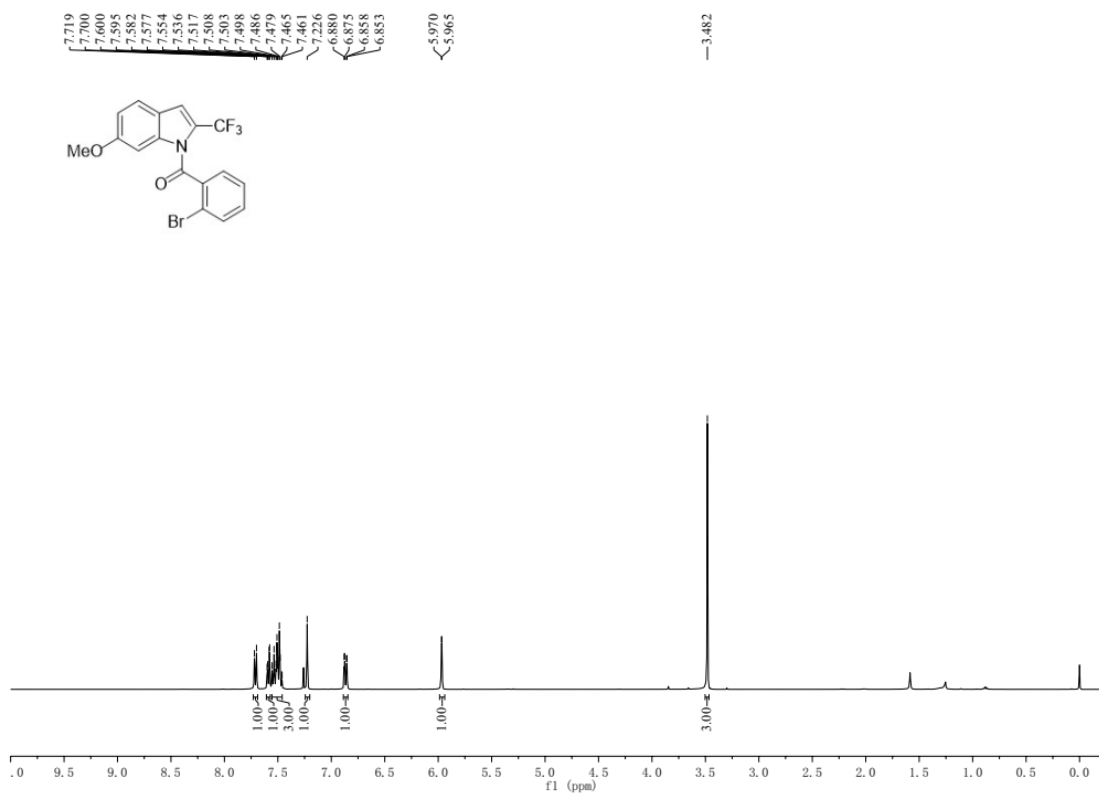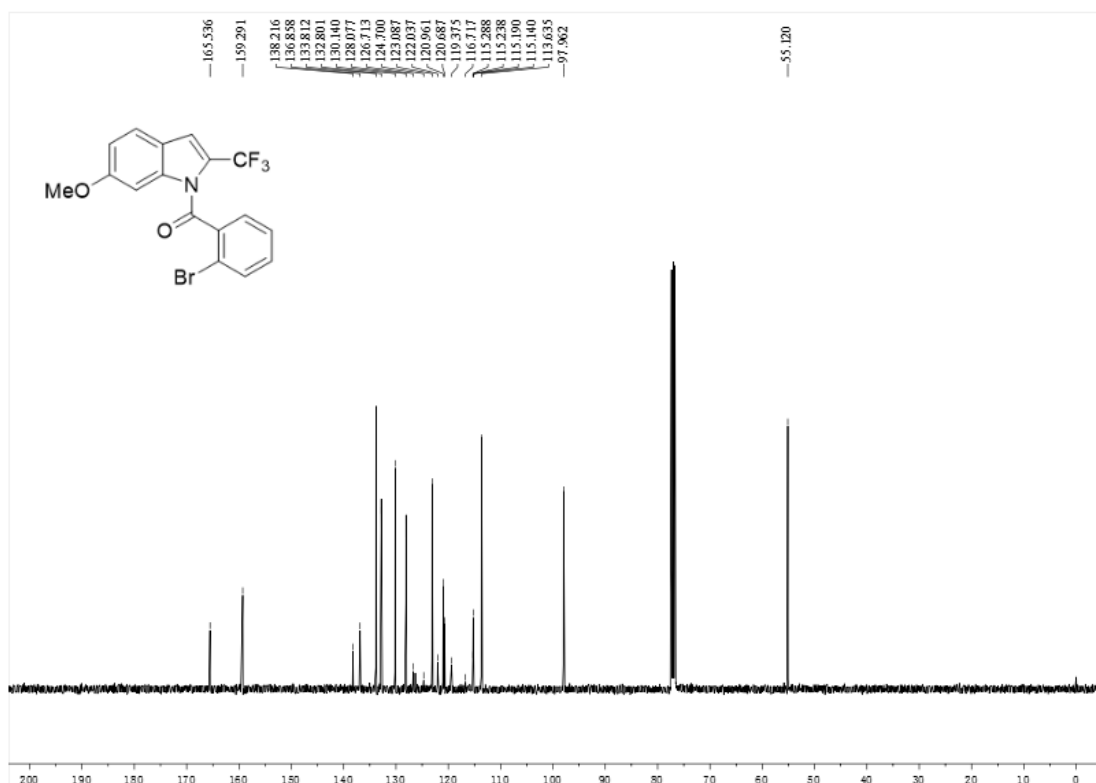

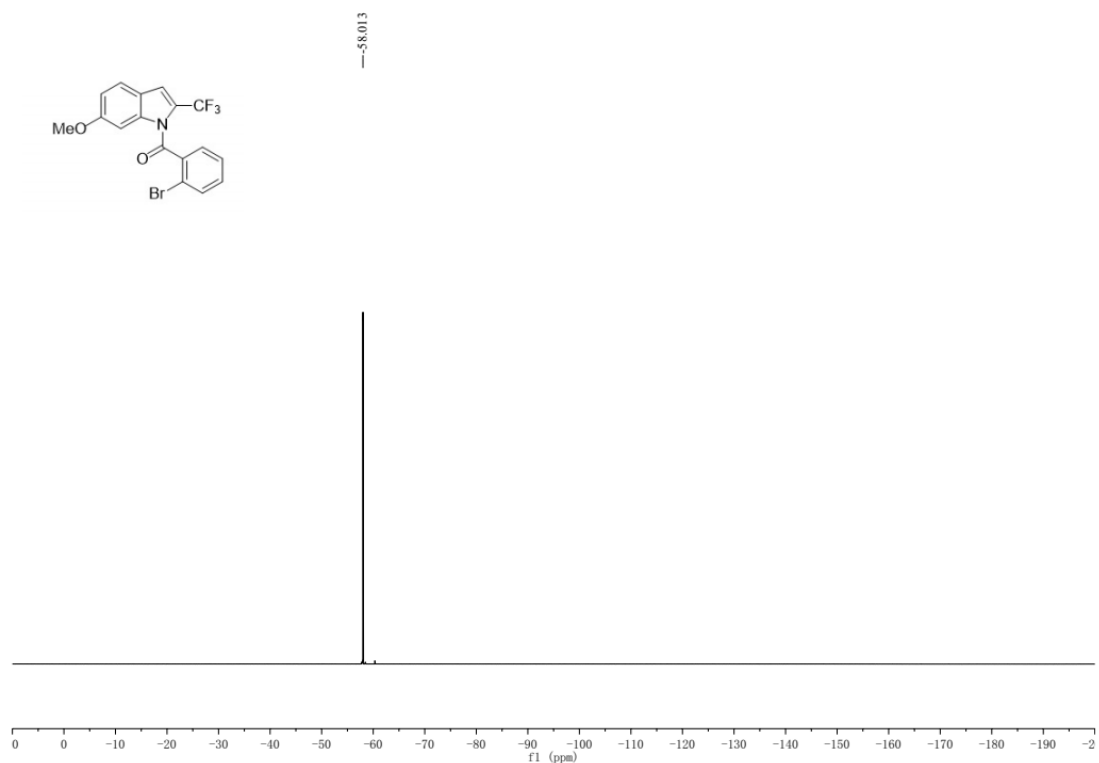

**(2-Bromophenyl)(6-fluoro-2-(trifluoromethyl)-1H-indol-1-yl)methanone (1q):**

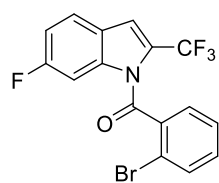

Purified by chromatography on silica gel, eluting with ethyl acetate/petroleum ether 1:100 (v/v); light yellow solid 43% yield (for the last step); m.p. 79-81 °C. <sup>1</sup>H NMR (600 MHz, CDCl<sub>3</sub>) δ 7.70 (d, *J* = 7.7 Hz, 1H), 7.60-7.57 (m, 2H), 7.55-7.49 (m, 2H), 7.27 (s, 1H), 7.01 (t, *J* = 8.4 Hz, 1H), 6.19 (d, *J* = 10.5 Hz, 1H). <sup>13</sup>C NMR (150 MHz, CDCl<sub>3</sub>) δ 165.4, 161.9 (d, *J* = 244.5 Hz), 137.4 (d, *J* = 12.0 Hz), 136.0, 134.0, 133.3, 130.3, 128.5, (d, *J* = 4.5 Hz), 128.2, 123.7, 123.6, 120.6, 120.4 (q, *J* = 267.0 Hz), 114.6 (q, *J* = 4.5 Hz), 112.9 (d, *J* = 24.0 Hz), 101.5 (d, *J* = 30.0 Hz). <sup>19</sup>F NMR (377 MHz, CDCl<sub>3</sub>) δ -58.2, -112.0 ppm. HRMS *m/z* (ESI<sup>+</sup>): Calcd for C<sub>16</sub>H<sub>8</sub>BrF<sub>4</sub>NONa<sup>+</sup> (M+Na)<sup>+</sup> 407.9618, found 407.9619.

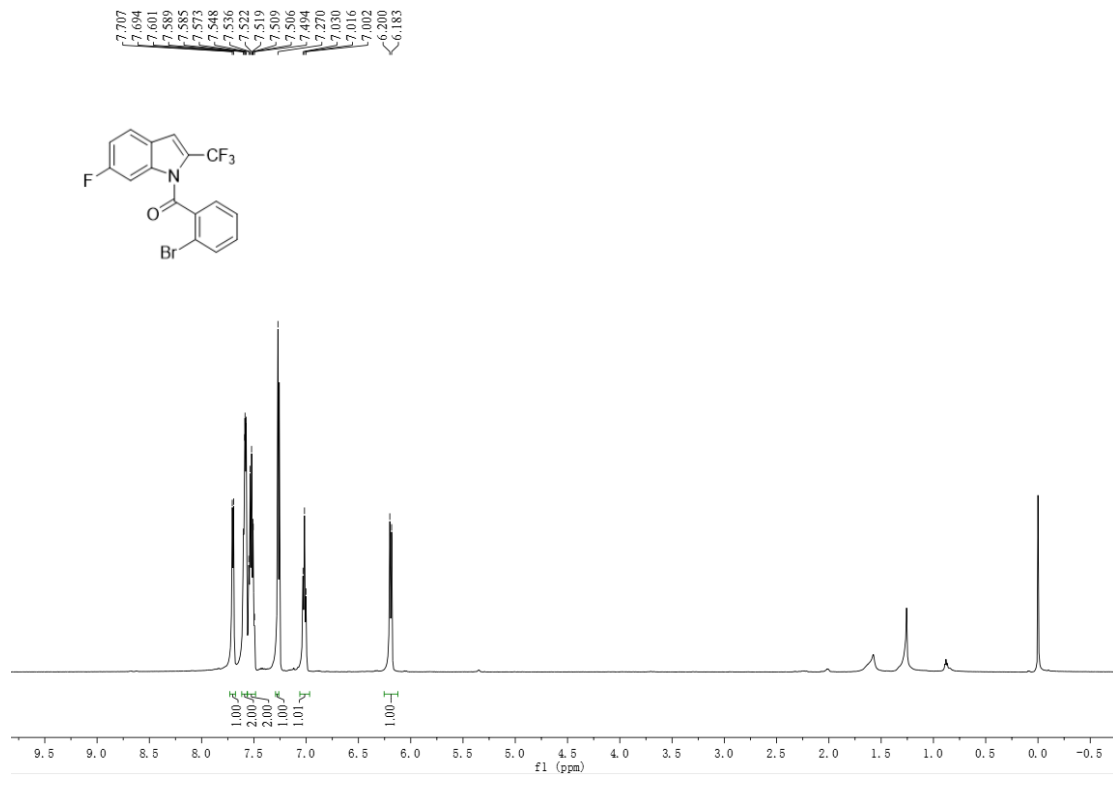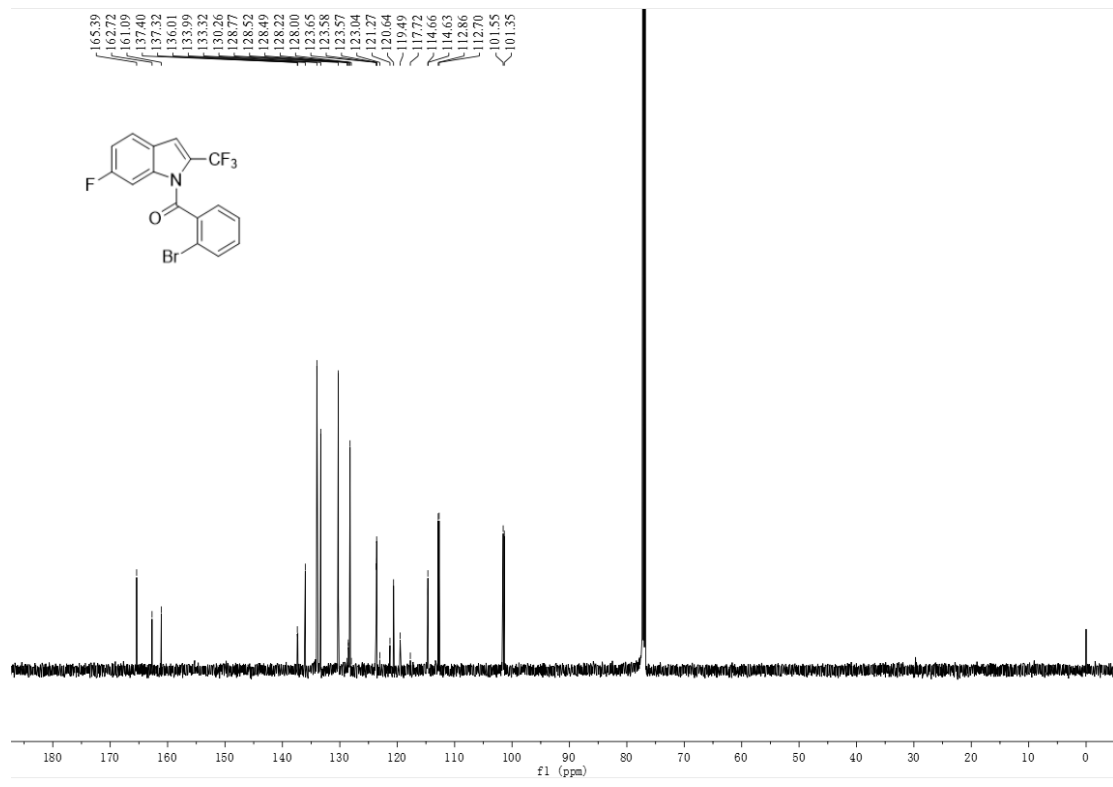

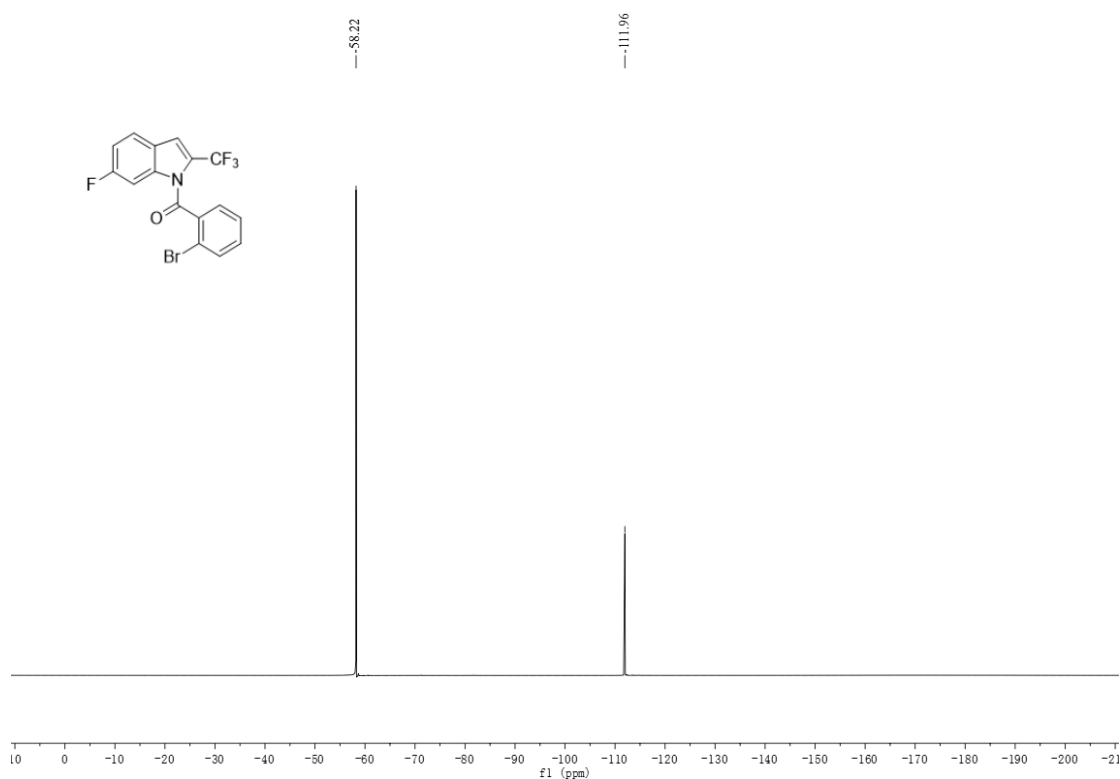

**(2-Bromophenyl)(6-chloro-2-(trifluoromethyl)-1H-indol-1-yl)methanone (1r):**

Purified by chromatography on silica gel, eluting with ethyl acetate/petroleum ether 1:100 (v/v); white solid 41% yield (for the last step); m.p. 74-76 °C. <sup>1</sup>H NMR (400 MHz, CDCl<sub>3</sub>) δ 7.71 (dd, *J* = 7.1, 1.9 Hz, 1H), 7.61-7.51 (m, 4H), 7.26-7.23 (m, 2H), 6.48 (s, 1H). <sup>13</sup>C NMR (100 MHz, CDCl<sub>3</sub>) δ 165.4, 137.3, 135.9, 134.0, 133.4, 132.9, 130.4, 128.7, 128.3, 125.7, 124.8, 124.4, 122.9, 120.4 (q, *J* = 267.0 Hz), 120.7, 114.5 (q, *J* = 5.0 Hz), 114.4, 77.4. <sup>19</sup>F NMR (377 MHz, CDCl<sub>3</sub>) δ -58.3 ppm. HRMS *m/z* (ESI<sup>+</sup>): Calcd for C<sub>16</sub>H<sub>8</sub>BrClF<sub>3</sub>NONa<sup>+</sup> (M+Na)<sup>+</sup> 423.9322, found 423.9320.

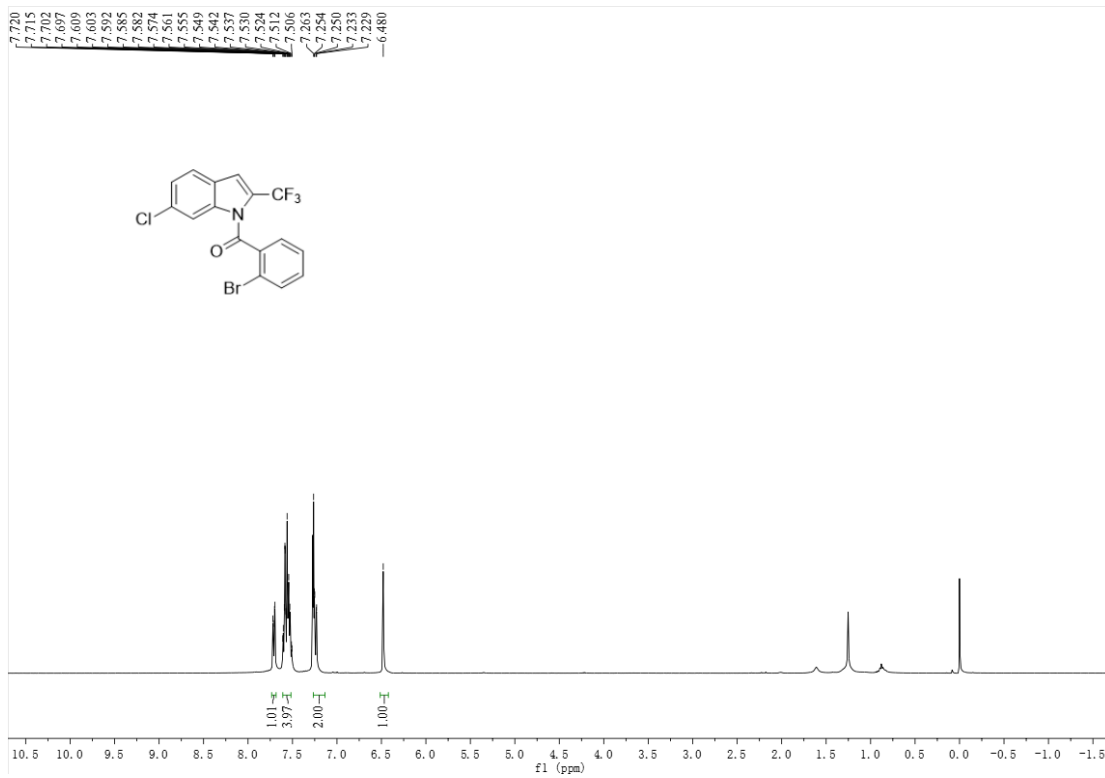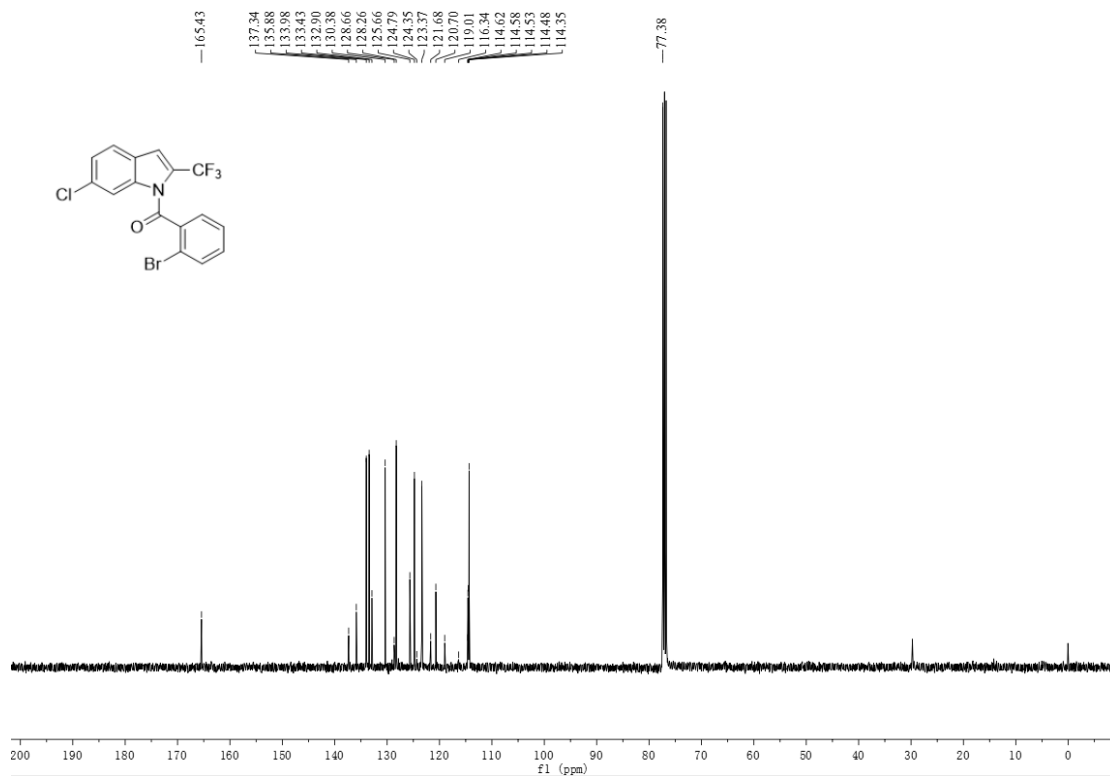

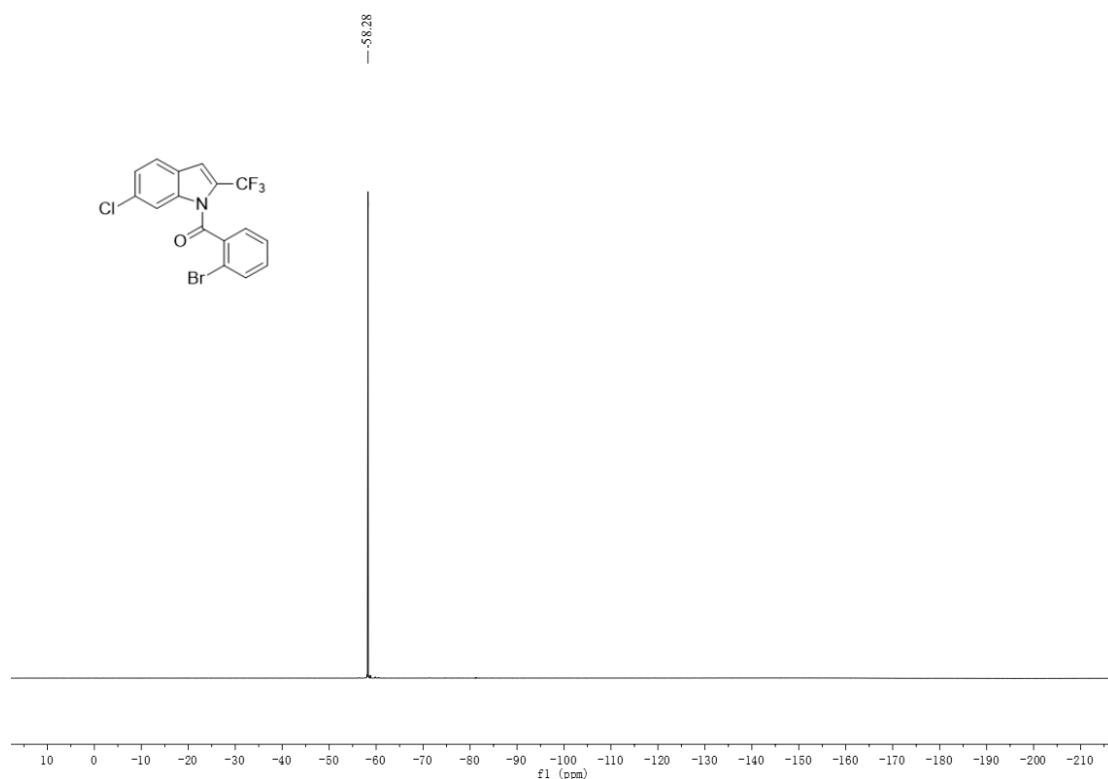

**(2-Bromophenyl)(5-methoxy-2-(trifluoromethyl)-1H-indol-1-yl)methanone (1s):**

Purified by chromatography on silica gel, eluting with ethyl acetate/petroleum ether 1:100 (v/v); reddish brown liquid 44% yield (for the last step). <sup>1</sup>H NMR (400 MHz, CDCl<sub>3</sub>) δ 7.68 (d, *J* = 7.5 Hz, 1H), 7.58-7.46 (m, 3H), 7.23 (s, 1H), 7.05 (s, 1H), 6.74 (d, *J* = 9.2 Hz, 1H), 6.27 (d, *J* = 9.2 Hz, 1H), 3.81 (s, 3H). <sup>13</sup>C NMR (100 MHz, CDCl<sub>3</sub>) δ 165.3, 156.4, 136.6, 133.8, 133.0, 131.6, 130.1, 128.3 (q, *J* = 40.0 Hz), 128.2, 128.1, 120.6, 120.5 (q, *J* = 266.0 Hz), 116.3, 115.1 (q, *J* = 5.0 Hz), 114.8, 104.1, 55.6. <sup>19</sup>F NMR (377 MHz, CDCl<sub>3</sub>) δ -58.5 ppm. HRMS *m/z* (ESI<sup>+</sup>): Calcd for C<sub>17</sub>H<sub>11</sub>BrF<sub>3</sub>NO<sub>2</sub>Na<sup>+</sup> (M+Na)<sup>+</sup> 419.9818, found 419.9819.



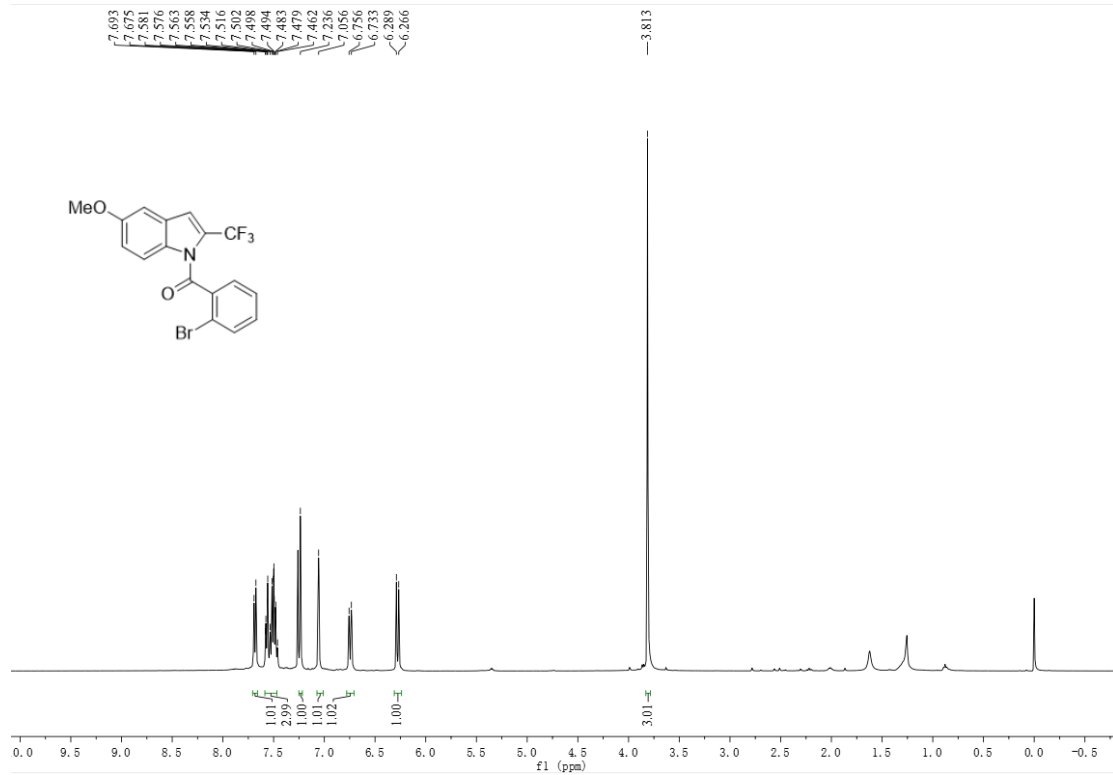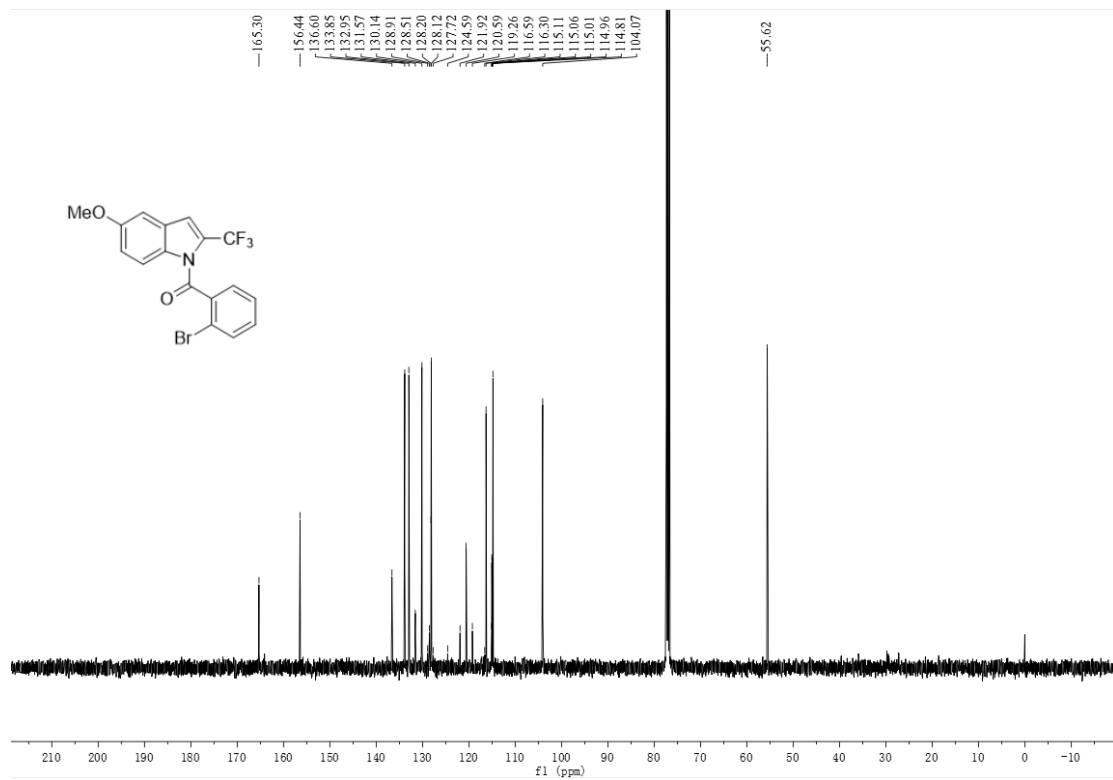

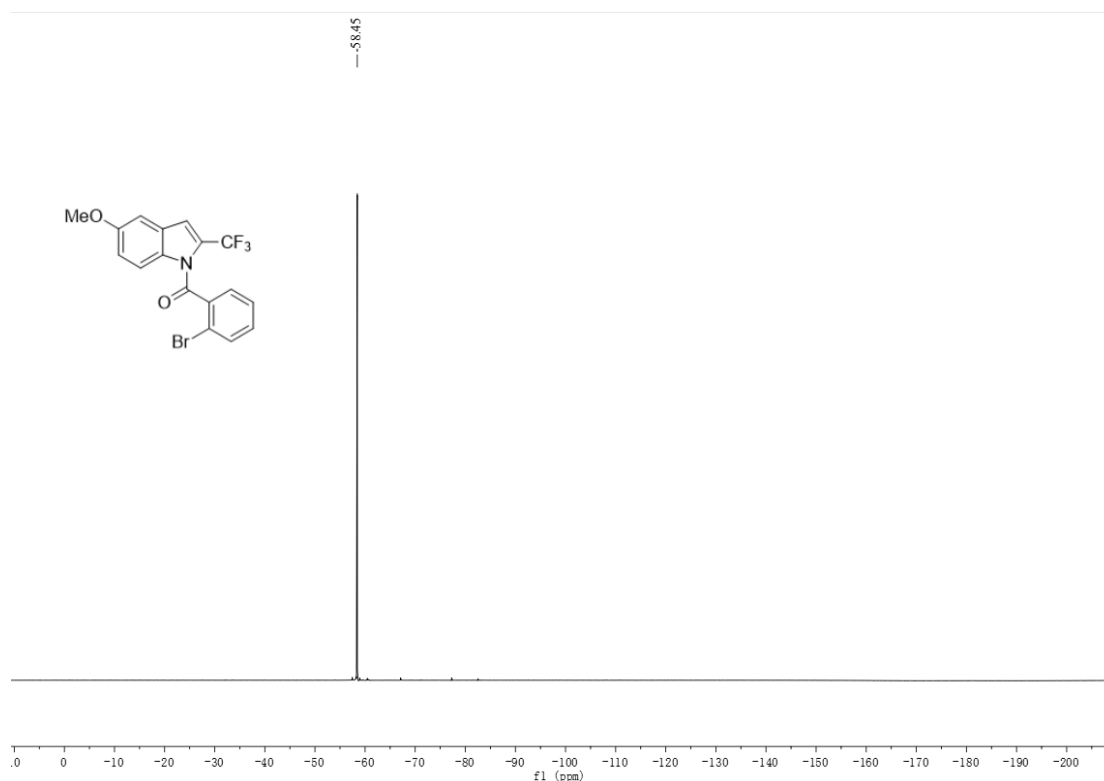

**(2-Bromophenyl)(2-(Difluoromethyl)-1H-indol-1-yl)methanone (1t):**

Purified by chromatography on silica gel, eluting with ethyl acetate/petroleum ether 1:100 (v/v); reddish brown liquid 35% yield (for the last step). <sup>1</sup>H NMR (400 MHz, CDCl<sub>3</sub>) δ 7.72 (d, *J* = 7.0 Hz, 1H), 7.61 (d, *J* = 7.8 Hz, 1H), 7.53-7.50 (m, 3H), 7.39 (s, 1H), 7.24-7.20 (m, 2H), 7.06 (t, *J* = 8.1 Hz, 1H), 6.26 (d, *J* = 8.5 Hz, 1H). <sup>13</sup>C NMR (100 MHz, CDCl<sub>3</sub>) δ 166.6, 136.9, 136.5, 133.9 (t, *J* = 29 Hz), 133.8, 132.8, 129.4, 128.7, 128.3, 126.0, 124.0, 122.4, 120.1, 113.8, 112.4 (t, *J* = 7 Hz), 109.80 (t, *J* = 235 Hz). <sup>19</sup>F NMR (376 MHz, CDCl<sub>3</sub>) δ -114.09 (dd, *J* = 799.2, 293.0 Hz, 2F). HRMS *m/z* (ESI<sup>+</sup>): Calcd for C<sub>16</sub>H<sub>10</sub>BrF<sub>2</sub>NONa<sup>+</sup> (M+Na)<sup>+</sup> 371.9806, found 371.9807.

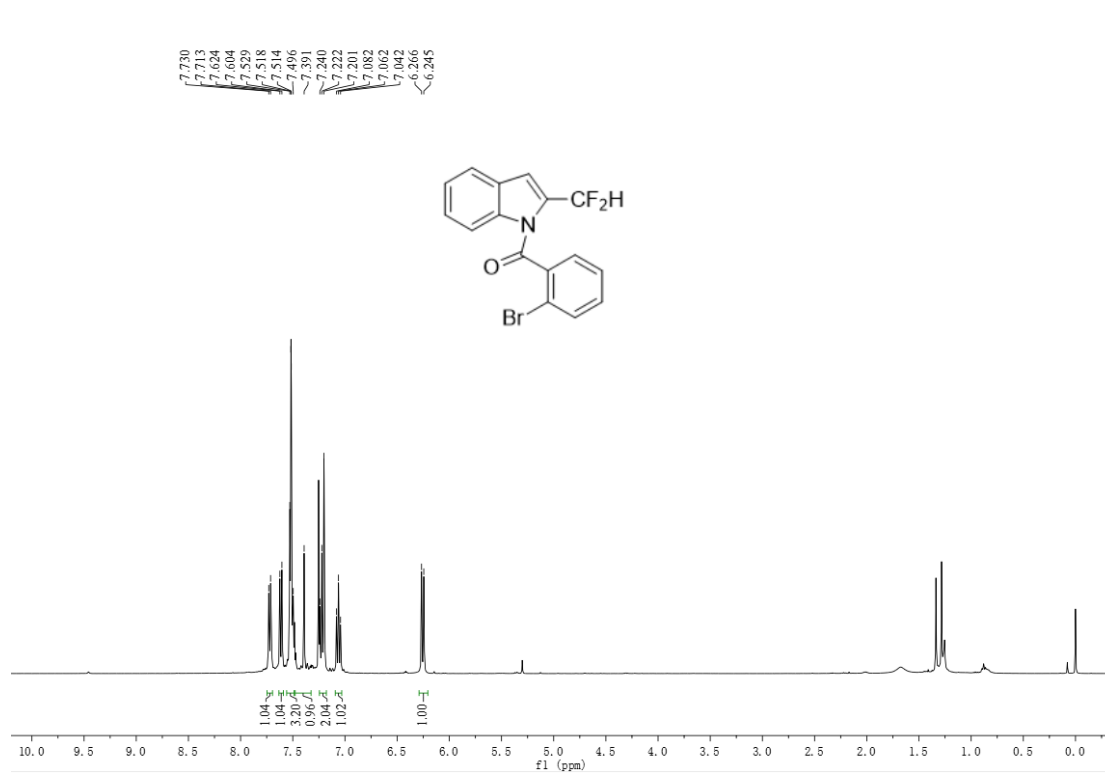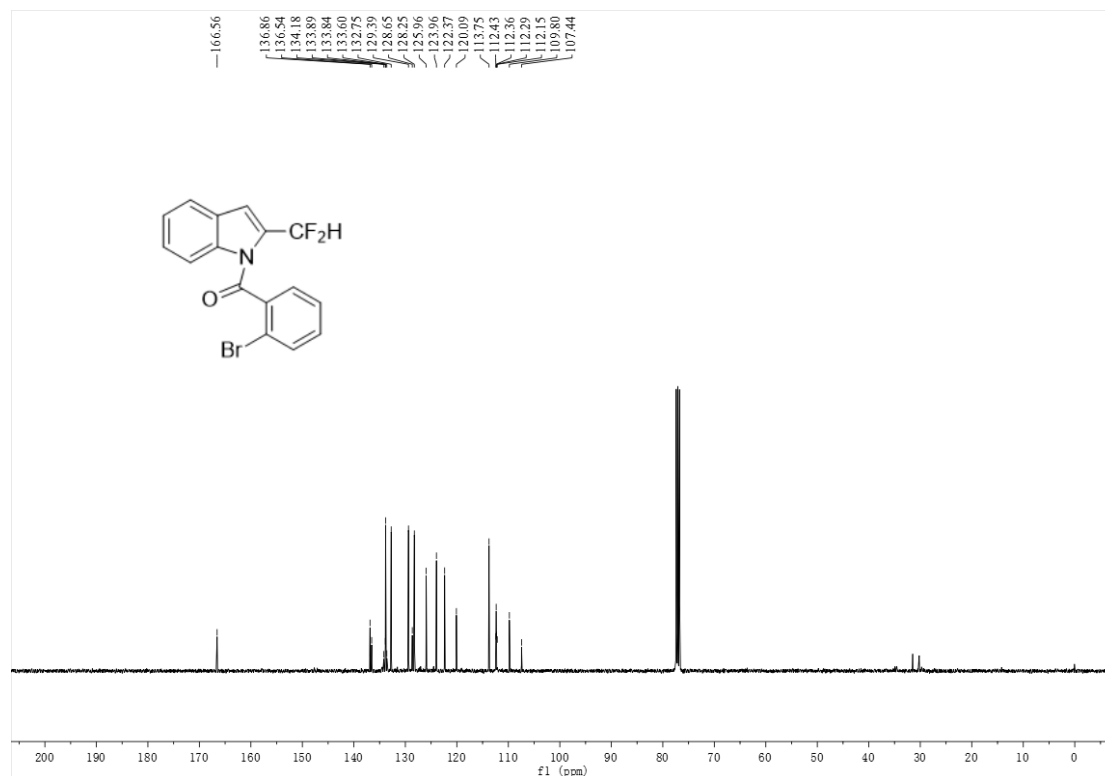

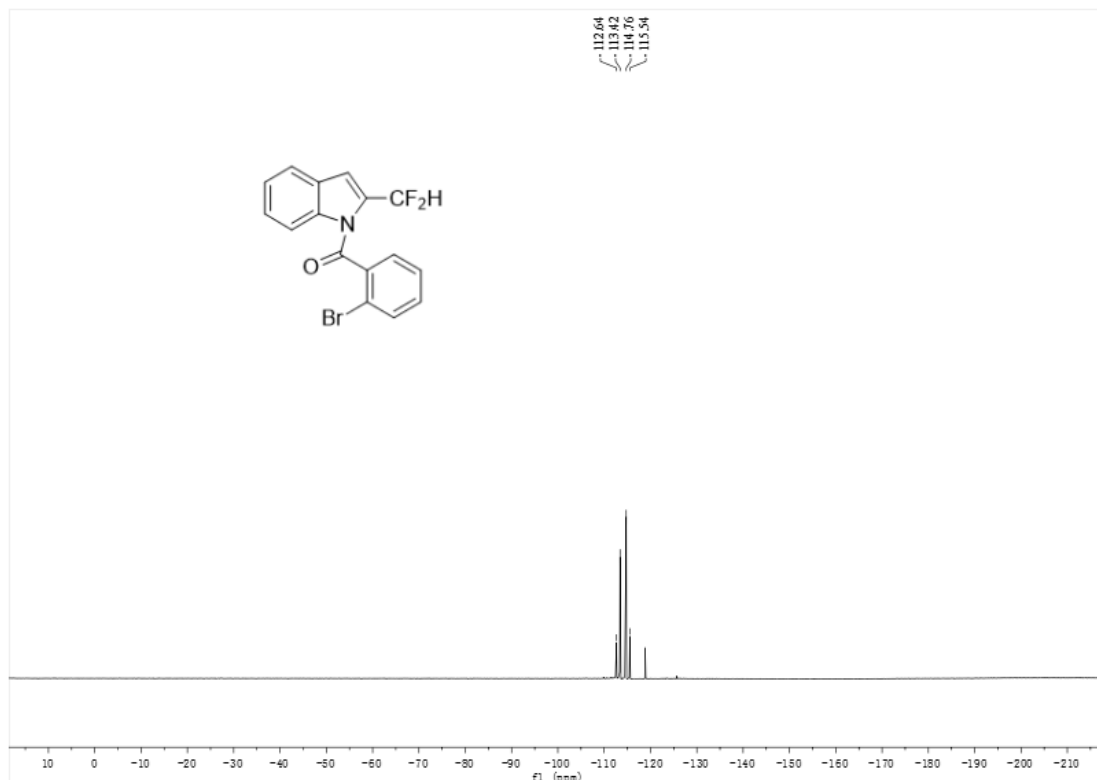

#### 4. Procedure for enantioselective dearomative reductive Heck of **1**

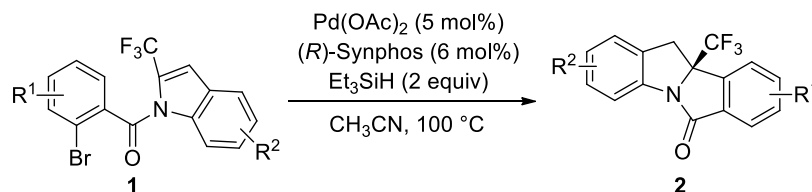

To a dried Schlenk tube were charged with Pd(OAc)<sub>2</sub> (2.3 mg, 0.01 mmol) and (*R*)-Synphos (7.6 mg, 0.012 mmol) under N<sub>2</sub> atmosphere, 2.0 mL CH<sub>3</sub>CN was then introduced via a syringe and the tube was sealed using Teflon cap. After stirring at 40 °C for 0.5 h, substrate **1** (0.2 mmol) and Et<sub>3</sub>SiH (0.4 mmol) were added to the reaction mixture. The resulting mixture was then allowed to stir at 100 °C until the reaction was complete (monitored by TLC). The solution was then concentrated under reduced pressure. The residue was purified by column chromatography on silica gel, eluting with ethyl/petroleum ether 1:50 (v/v) to afford the products **2**.

#### *(R)*-10*b*-(Trifluoromethyl)-10*b*,11-dihydro-6*H*-isoindolo[2,1-*a*]indol-6-one (**2a**):

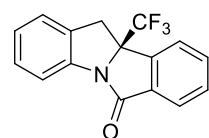

Purified by chromatography on silica gel, eluting with ethyl acetate/petroleum ether 1:50 (v/v); white solid (68% yield), m.p. 99–101 °C.  $[\alpha]_D^{20} = +196.1$  (c 0.5, CH<sub>2</sub>Cl<sub>2</sub>), 99% ee Chiralpak AD-H column (25 cm × 0.46 cm ID), <sup>n</sup>hexane/<sup>i</sup>PrOH = 80/20, 0.7 mL/min, 280 nm;  $t_{\text{major}} = 13.4$  min,  $t_{\text{minor}} = 17.3$  min]. <sup>1</sup>H NMR (600 MHz, CDCl<sub>3</sub>) δ 7.92 (d, *J* = 6.6 Hz, 1H), 7.71–7.58 (m, 4H), 7.31–7.21 (m, 2H), 7.10 (t, *J* = 7.1 Hz, 1H), 3.72 (dd, *J* = 16.7, 4.9 Hz, 1H), 3.43 (dd, *J* = 16.4, 4.7 Hz, 1H). <sup>13</sup>C NMR (150 MHz, CDCl<sub>3</sub>) δ 169.7, 142.7, 140.8, 133.7, 133.4, 133.2, 130.5, 128.3, 125.3 (q, *J* = 282.0 Hz) 125.4,

125.1, 124.8, 123.4, 116.7, 74.2 (q,  $J = 30.0$  Hz), 34.7.  $^{19}\text{F}$  NMR (377 MHz,  $\text{CDCl}_3$ )  $\delta$  -79.9 ppm. HRMS  $m/z$  (ESI+): Calcd for  $\text{C}_{16}\text{H}_{10}\text{F}_3\text{NONa}^+$  ( $\text{M}+\text{Na}$ ) $^+$  312.0607, found 312.0606.

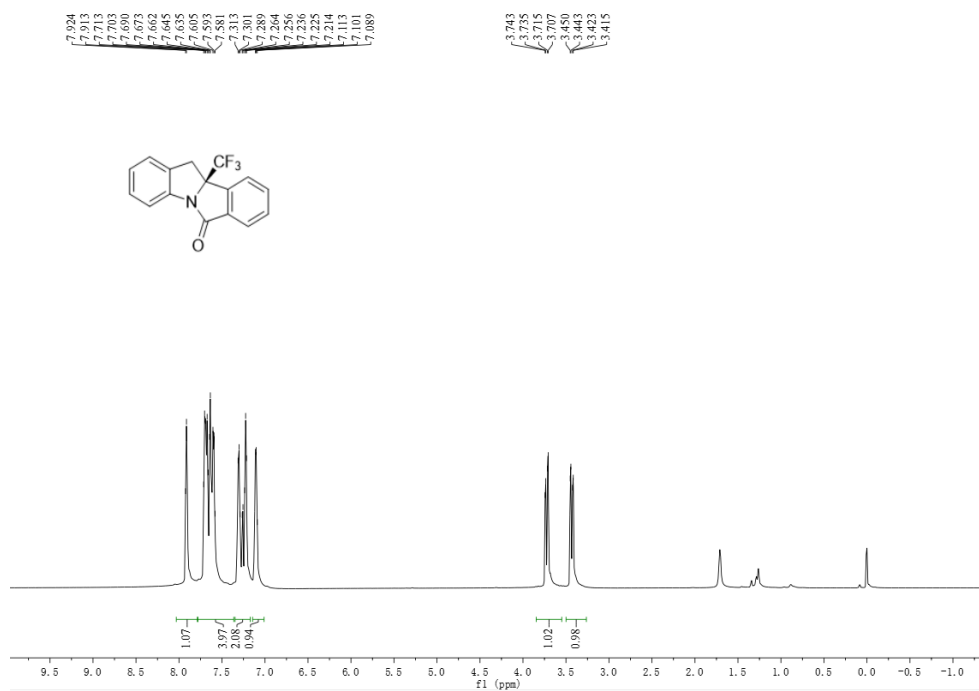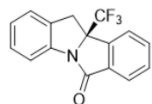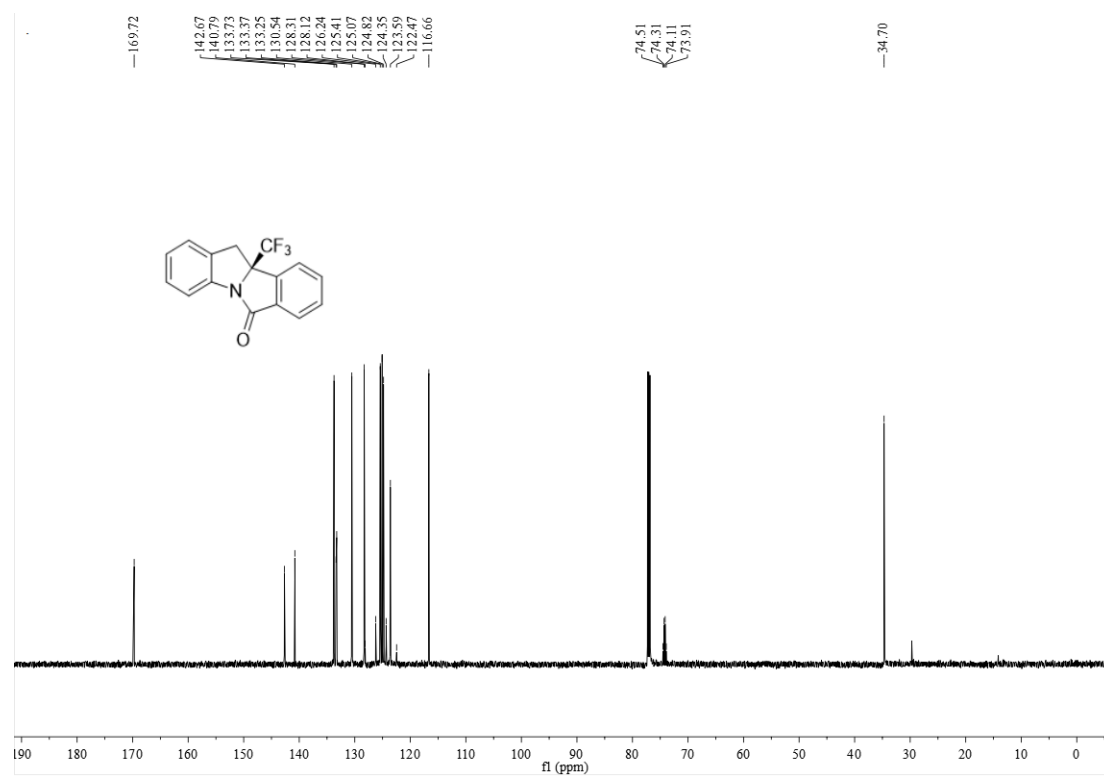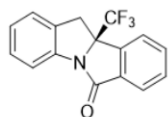

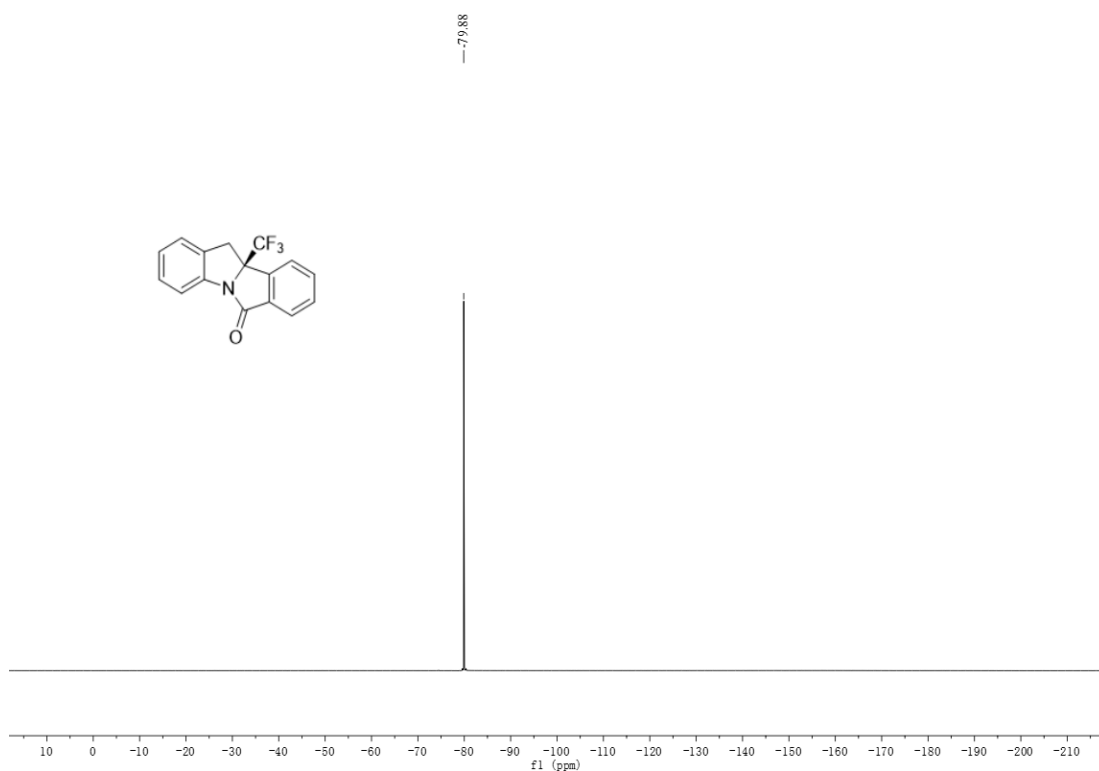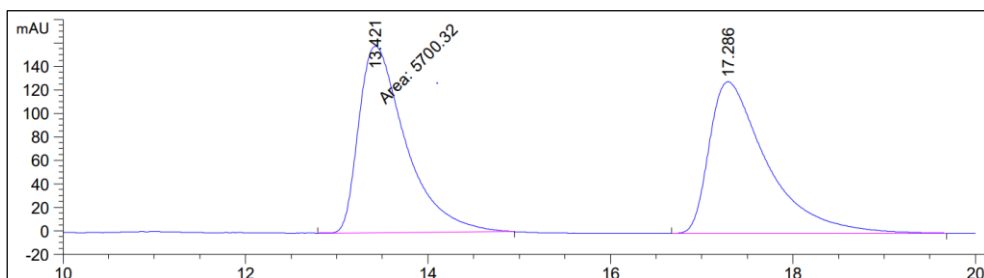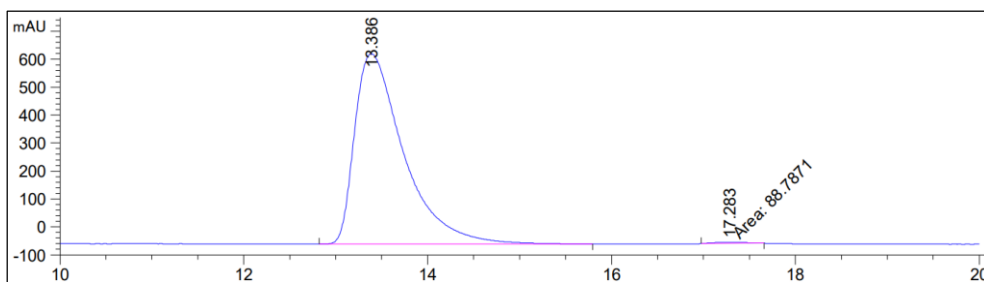

| Peak # | RetTime [min] | Type | Width [min] | Area [mAU*s] | Height [mAU] | Area %  |
|--------|---------------|------|-------------|--------------|--------------|---------|
| 1      | 13.386        | BB   | 0.5518      | 2.51969e4    | 680.76855    | 99.6489 |
| 2      | 17.283        | MM   | 0.3864      | 88.78711     | 3.82941      | 0.3511  |

**(R)-9-Methoxy-10b-(trifluoromethyl)-10b,11-dihydro-6H-isoindolo[2,1-a]indol-6-one (2b):**

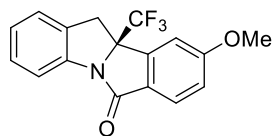

Purified by chromatography on silica gel, eluting with ethyl acetate/petroleum ether 1:50 (v/v); colorless oil (58% yield).  $[\alpha]_D^{20} = +294.4$  (c 0.5,  $\text{CH}_2\text{Cl}_2$ ), 99% ee [Daicel Chiralpak C1 column (25 cm  $\times$  0.46 cm ID),  $^n\text{hexane}/i\text{PrOH} = 90/10$ , 0.7 mL/min, 280 nm;  $t_{\text{major}} = 11.7$  min,  $t_{\text{minor}} = 13.0$  min].  $^1\text{H}$  NMR (400 MHz,  $\text{CDCl}_3$ )  $\delta$  7.81 (d,  $J = 9.2$  Hz, 1H), 7.67 (d,  $J = 8.0$  Hz, 1H), 7.29 (t,  $J = 7.9$  Hz, 1H), 7.21 (d,  $J = 7.4$  Hz, 1H), 7.10-7.07 (m, 3H), 3.92 (s, 3H), 3.69 (d,  $J = 16.8$  Hz, 1H), 3.42 (d,  $J = 16.5$  Hz, 1H).  $^{13}\text{C}$  NMR (100 MHz,  $\text{CDCl}_3$ )  $\delta$  169.8, 164.4, 145.1, 141.2, 132.9, 128.3, 127.0, 125.4, 125.3 (q,  $J = 282.0$  Hz), 124.9, 124.8, 123.9, 116.68 (d,  $J = 12.0$  Hz), 108.7, 73.8 (q,  $J = 30.0$  Hz), 55.9, 34.8.  $^{19}\text{F}$  NMR (377 MHz,  $\text{CDCl}_3$ )  $\delta$  -80.0 ppm. HRMS  $m/z$  (ESI+): Calcd for  $\text{C}_{17}\text{H}_{12}\text{F}_3\text{NONa}^+$  ( $\text{M}+\text{Na}$ ) $^+$  342.0712, found 342.0714.

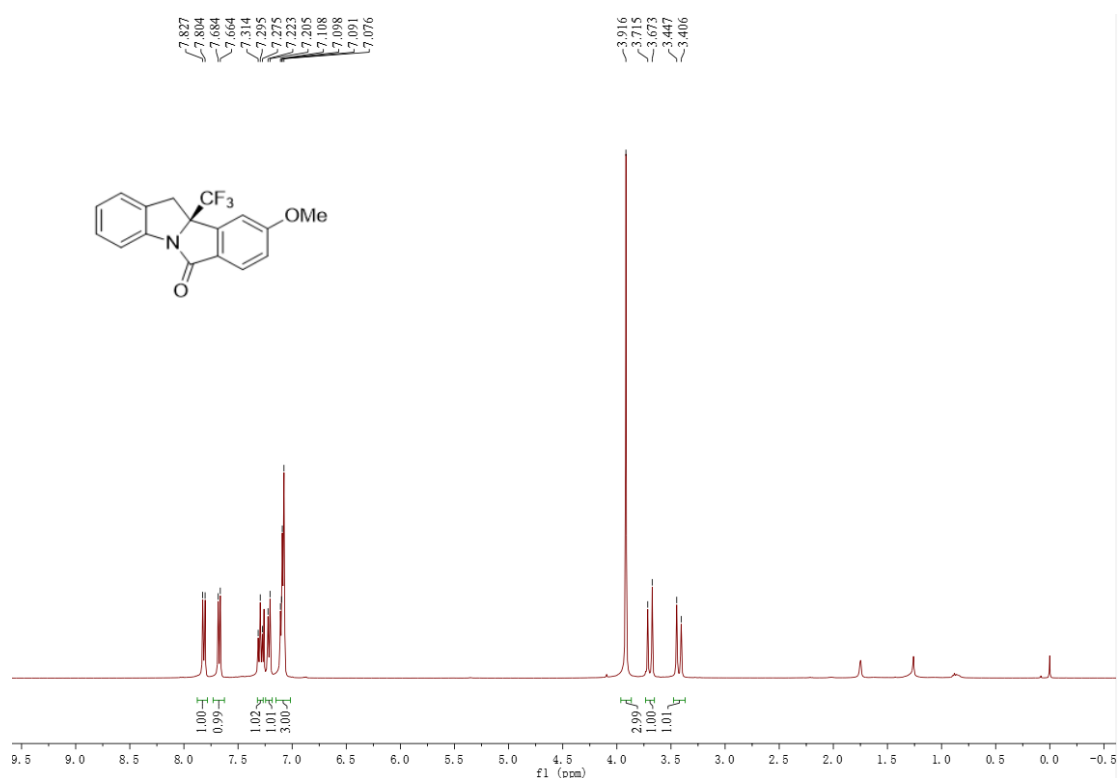

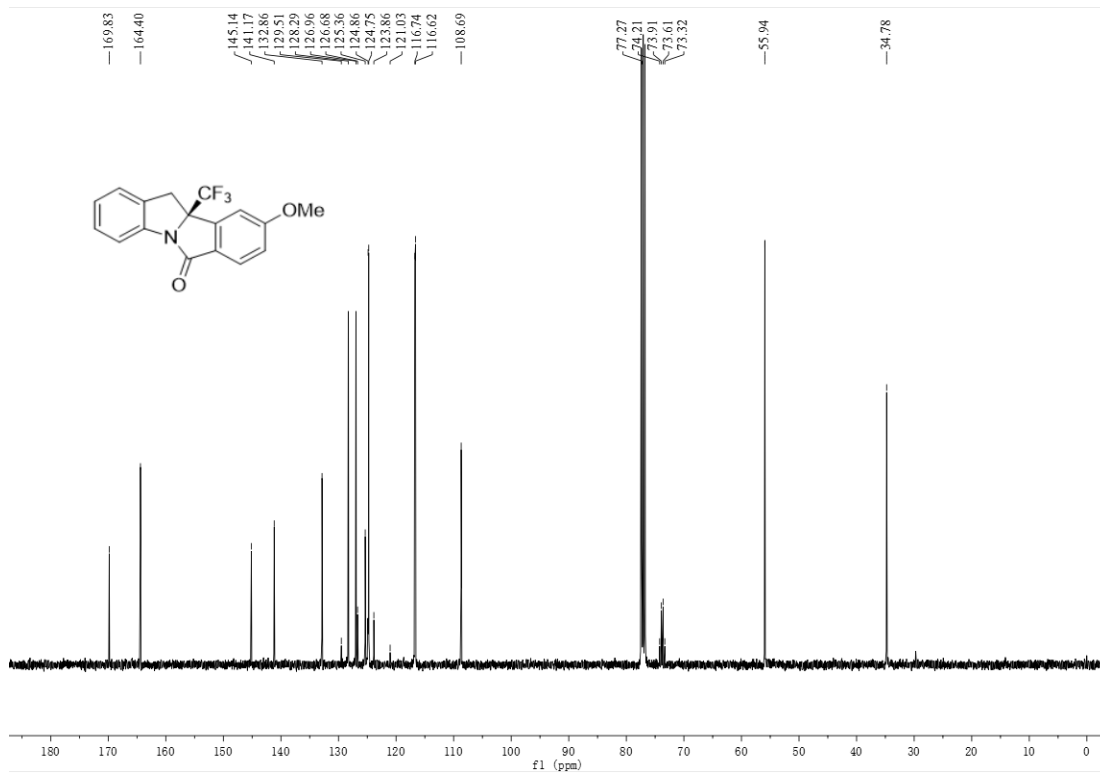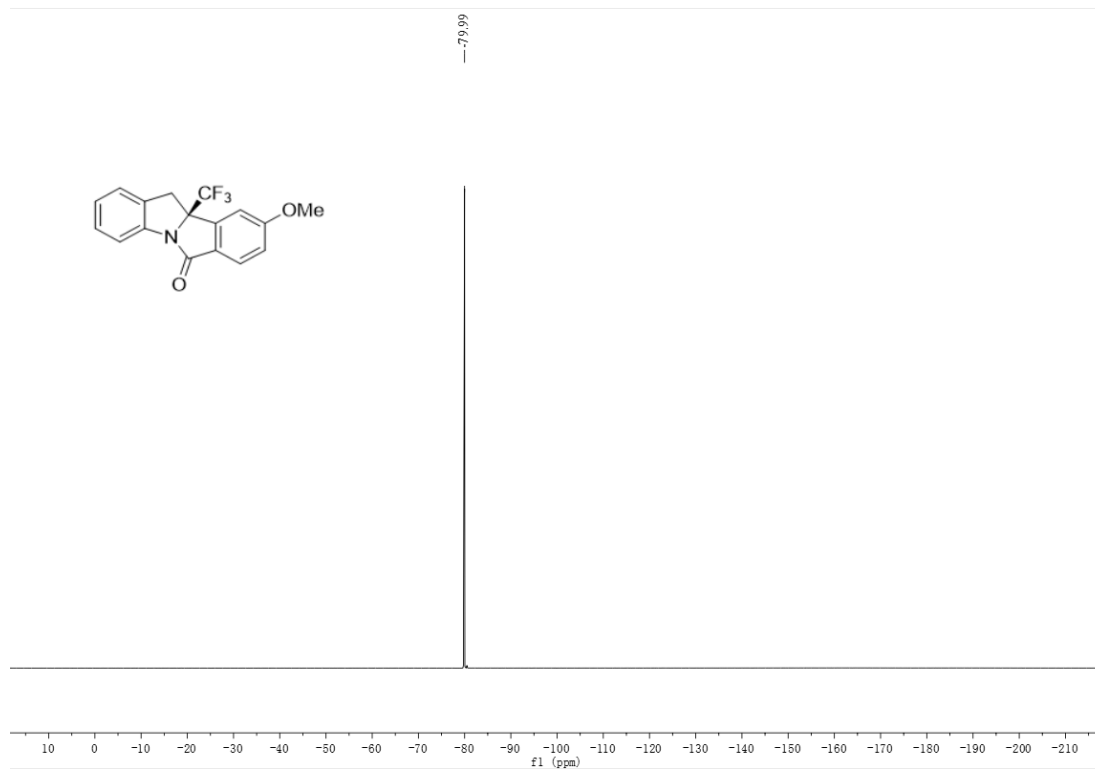



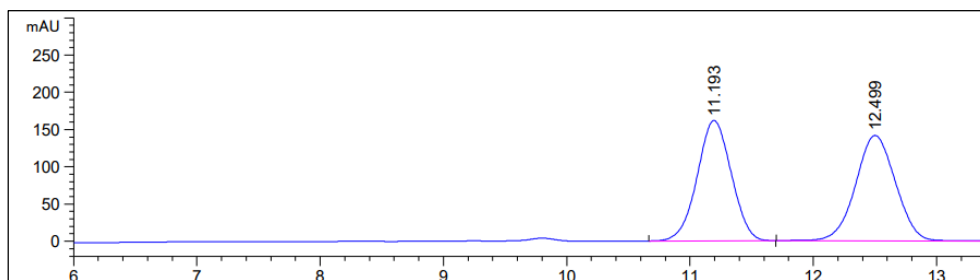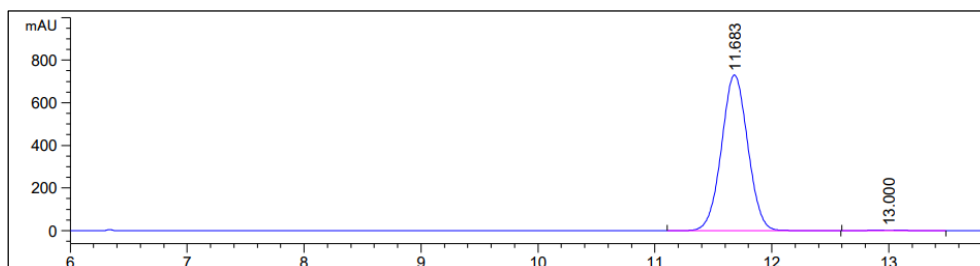

| Peak # | RetTime [min] | Type | Width [min] | Area [mAU*s] | Height [mAU] | Area %  |
|--------|---------------|------|-------------|--------------|--------------|---------|
| 1      | 11.683        | BB   | 0.2421      | 1.14086e4    | 731.03827    | 99.4468 |
| 2      | 13.000        | BB   | 0.2656      | 63.45918     | 3.70988      | 0.5532  |

**(R)-9-Methyl-10b-(trifluoromethyl)-10b,11-dihydro-6H-isoindolo[2,1-a]indol-6-one (2c):**

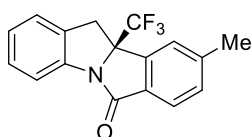

Purified by chromatography on silica gel, eluting with ethyl acetate/petroleum ether 1:50 (v/v); colorless oil (50% yield).  $[\alpha]_D^{20} = +264.4$  (c 0.5,  $\text{CH}_2\text{Cl}_2$ ), 99% ee [Daicel Chiralpak AS column (25 cm  $\times$  0.46 cm ID),  $^n\text{hexane}/i\text{PrOH} = 90/10$ , 0.6 mL/min, 280 nm;  $t_{\text{major}} = 8.1$  min,  $t_{\text{minor}} = 8.9$  min].  $^1\text{H}$  NMR (400 MHz,  $\text{CDCl}_3$ )  $\delta$  7.78 (d,  $J = 7.8$  Hz, 1H), 7.68 (d,  $J = 7.8$  Hz, 1H), 7.40 (t,  $J = 8.0$  Hz, 2H), 7.30 (t,  $J = 7.7$  Hz, 1H), 7.22 (d,  $J = 7.5$  Hz, 1H), 7.11-7.07 (m, 1H), 3.70 (d,  $J = 16.5$  Hz, 1H), 3.41 (d,  $J = 16.5$  Hz, 1H), 2.51 (s, 3H).  $^{13}\text{C}$  NMR (100 MHz,  $\text{CDCl}_3$ )  $\delta$  169.9, 145.0, 143.1, 141.0, 133.2, 131.5, 130.7, 128.3, 125.3 (q,  $J = 282.0$  Hz), 125.2, 125.0, 124.1, 124.8, 116.7, 74.0 (q,  $J = 30.1$  Hz), 34.7, 22.1.  $^{19}\text{F}$  NMR (377 MHz,  $\text{CDCl}_3$ )  $\delta$  -79.9 ppm. HRMS  $m/z$  (ESI+): Calcd for  $\text{C}_{17}\text{H}_{12}\text{F}_3\text{NONa}^+$  ( $\text{M}+\text{Na}$ ) $^+$  326.0763, found 326.0764.

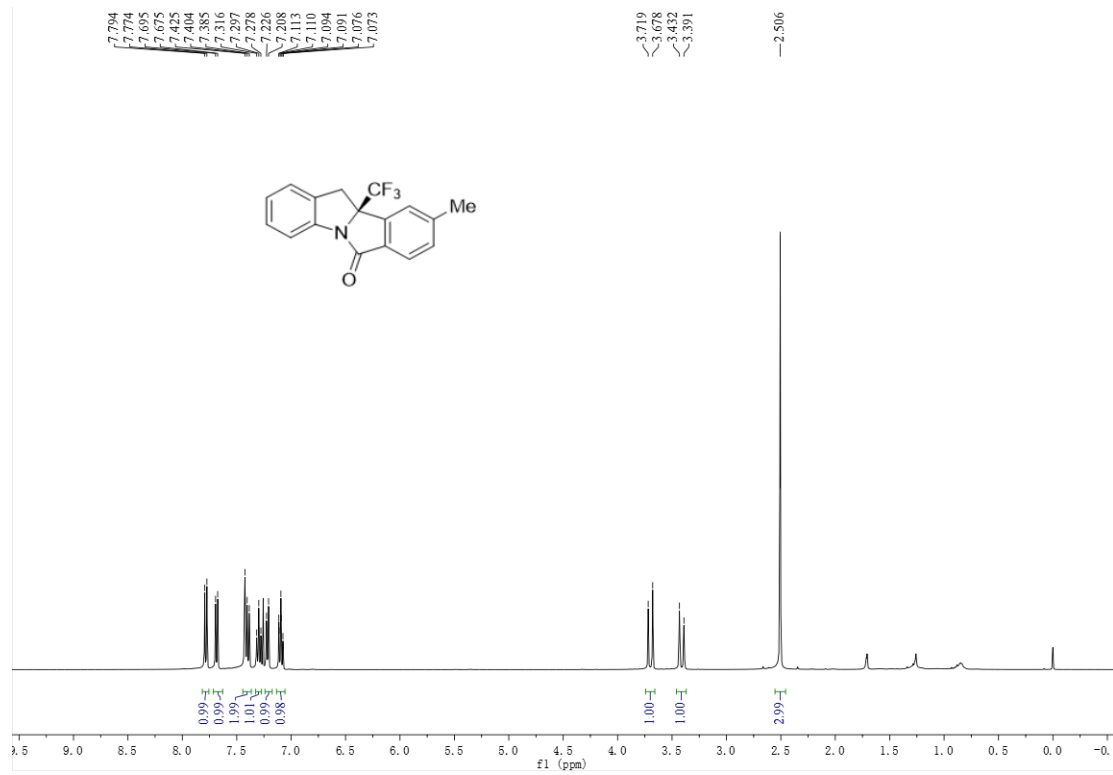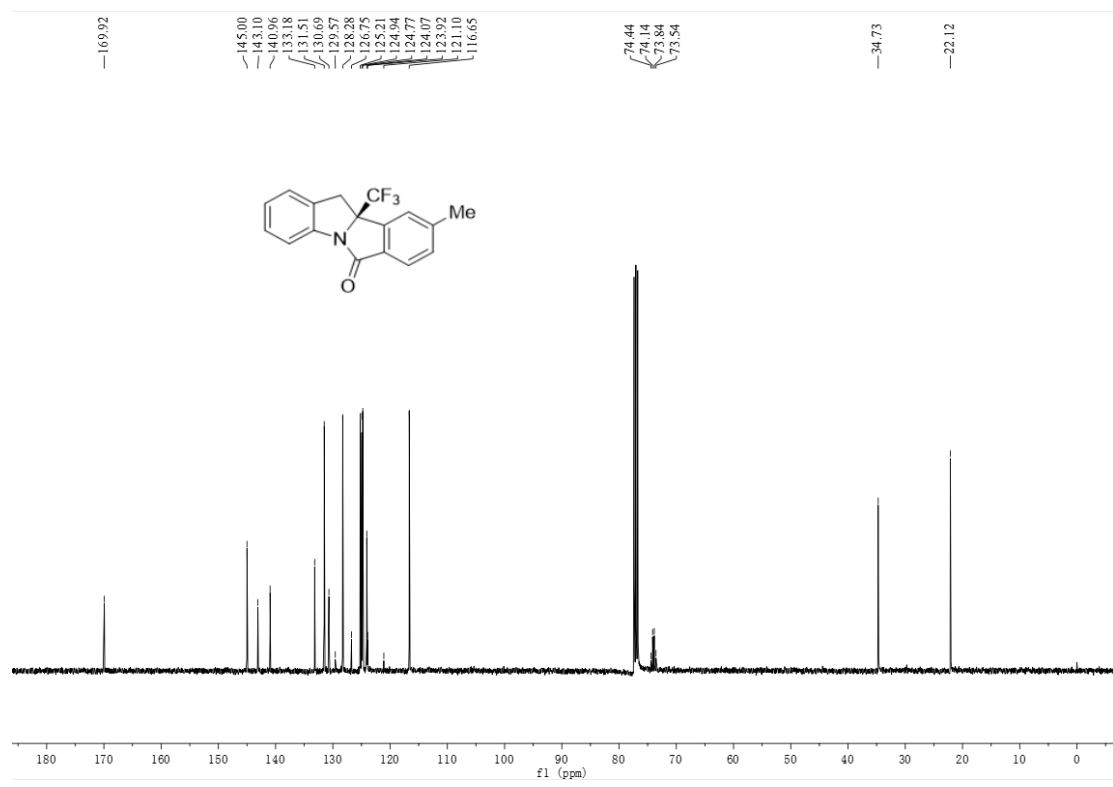

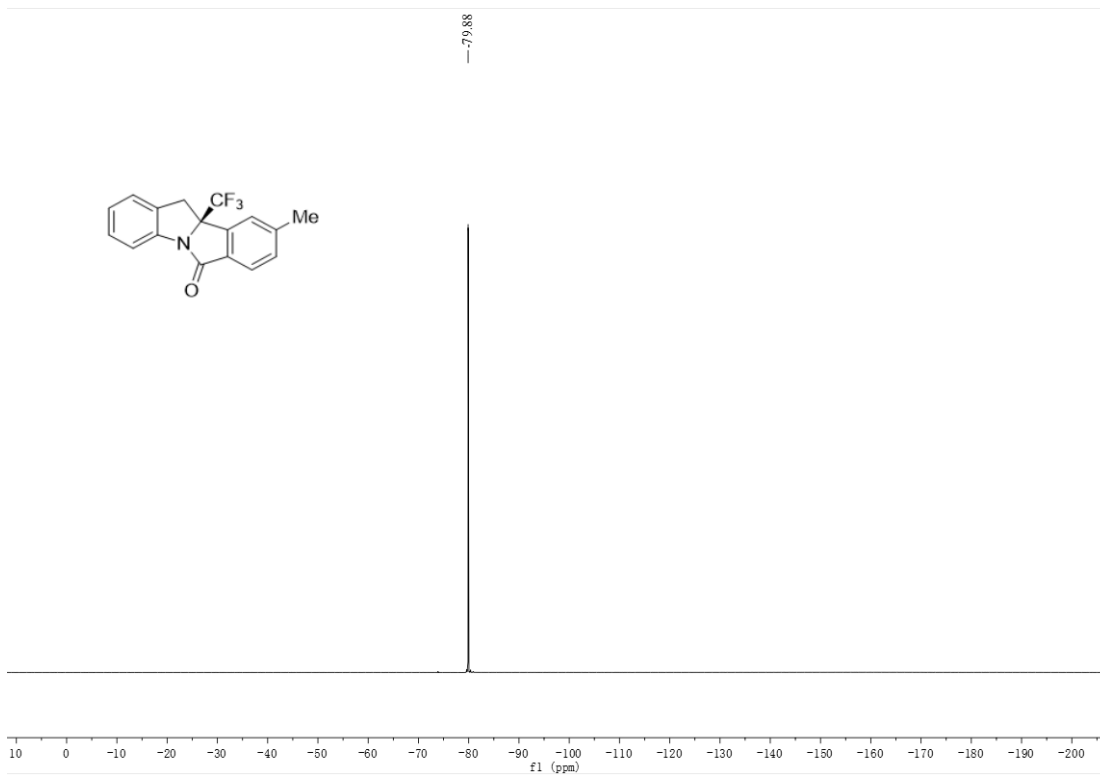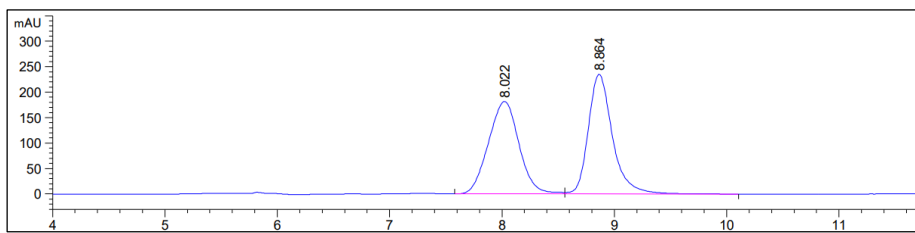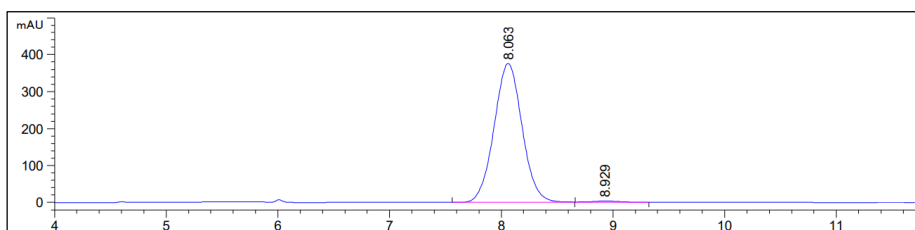

| Peak # | RetTime [min] | Type | Width [min] | Area [mAU*s] | Height [mAU] | Area %  |
|--------|---------------|------|-------------|--------------|--------------|---------|
| 1      | 8.063         | BB   | 0.2695      | 6533.57520   | 374.56882    | 99.2528 |
| 2      | 8.929         | BB   | 0.2463      | 49.18355     | 3.07998      | 0.7472  |

**(R)-9-chloro-10b-(trifluoromethyl)-10b,11-dihydro-6H-isoindolo[2,1-a]indol-6-one (2d):**

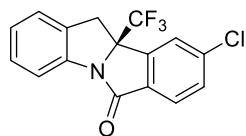

Purified by chromatography on silica gel, eluting with ethyl acetate/petroleum ether 1:50 (v/v); white solid (41% yield), m.p. 103-105 °C.  $[\alpha]_D^{20} = +177.3$  (c 0.5, CH<sub>2</sub>Cl<sub>2</sub>), 99% ee [Daicel Chiralpak C4 column (25 cm × 0.46 cm ID), "hexane/iPrOH = 90/10, 0.7 mL/min, 280 nm;  $t_{\text{minor}} = 7.8$  min,  $t_{\text{major}} = 11.6$  min]. <sup>1</sup>H NMR (400 MHz, CDCl<sub>3</sub>)  $\delta$  7.84 (d,  $J = 8.1$  Hz, 1H), 7.68 (d,  $J = 7.9$  Hz, 1H), 7.63 (s, 1H), 7.59 (d,  $J = 8.2$  Hz, 1H), 7.32 (t,  $J = 7.7$  Hz, 1H), 7.26-7.23 (m, 1H), 7.13 (t,  $J = 7.8$  Hz, 1H), 3.71 (d,  $J = 16.5$  Hz, 1H), 3.44 (d,  $J = 16.5$  Hz, 1H). <sup>13</sup>C NMR (100 MHz, CDCl<sub>3</sub>)  $\delta$  168.7, 144.0, 140.5, 140.3, 132.9, 131.9, 131.2, 128.5, 126.6, 125.3, 125.0 (q,  $J = 282.0$  Hz), 124.9, 124.2, 116.7, 73.9 (q,  $J = 30.0$  Hz), 34.6. <sup>19</sup>F NMR (377 MHz, CDCl<sub>3</sub>)  $\delta$  -79.8 ppm. HRMS  $m/z$  (ESI+): Calcd for C<sub>16</sub>H<sub>9</sub>ClF<sub>3</sub>NONa<sup>+</sup> (M+Na)<sup>+</sup> 346.0217, found 346.0216.

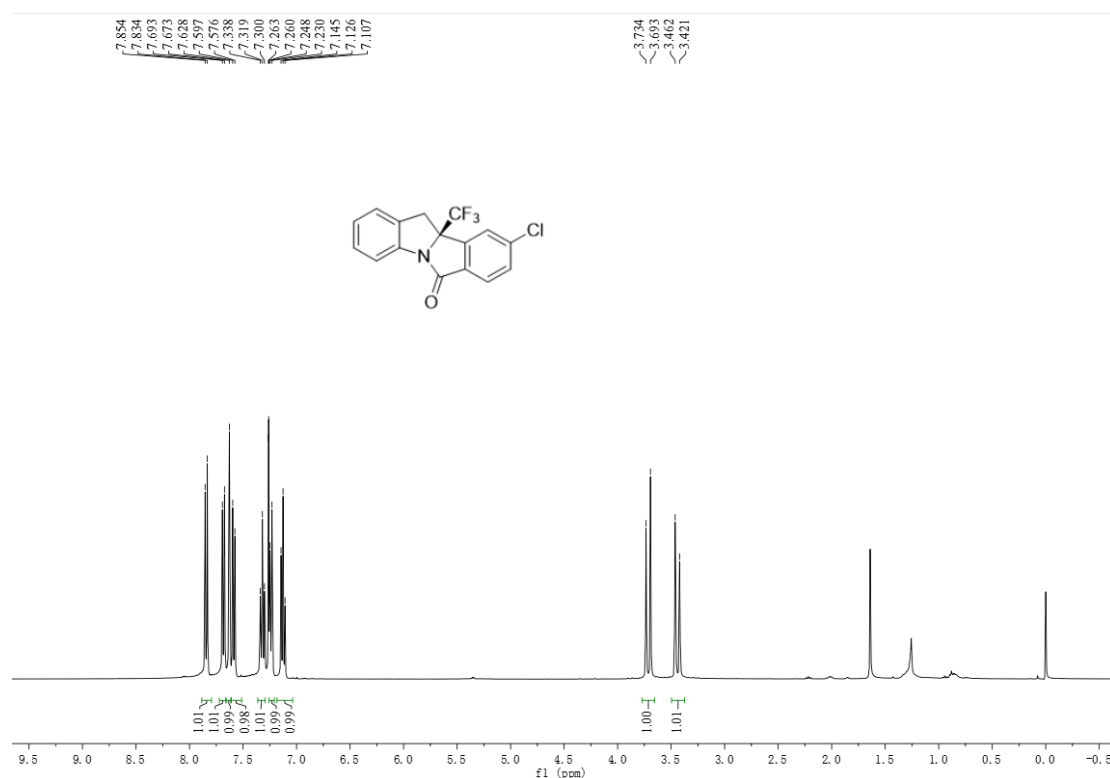

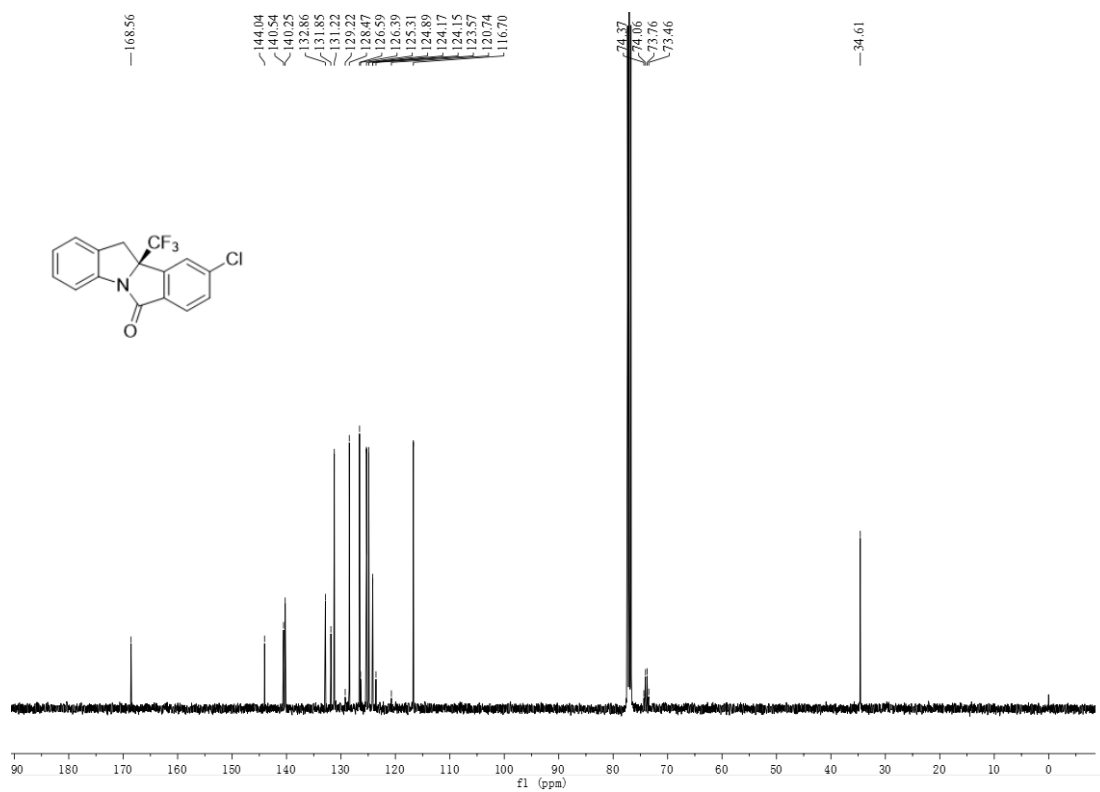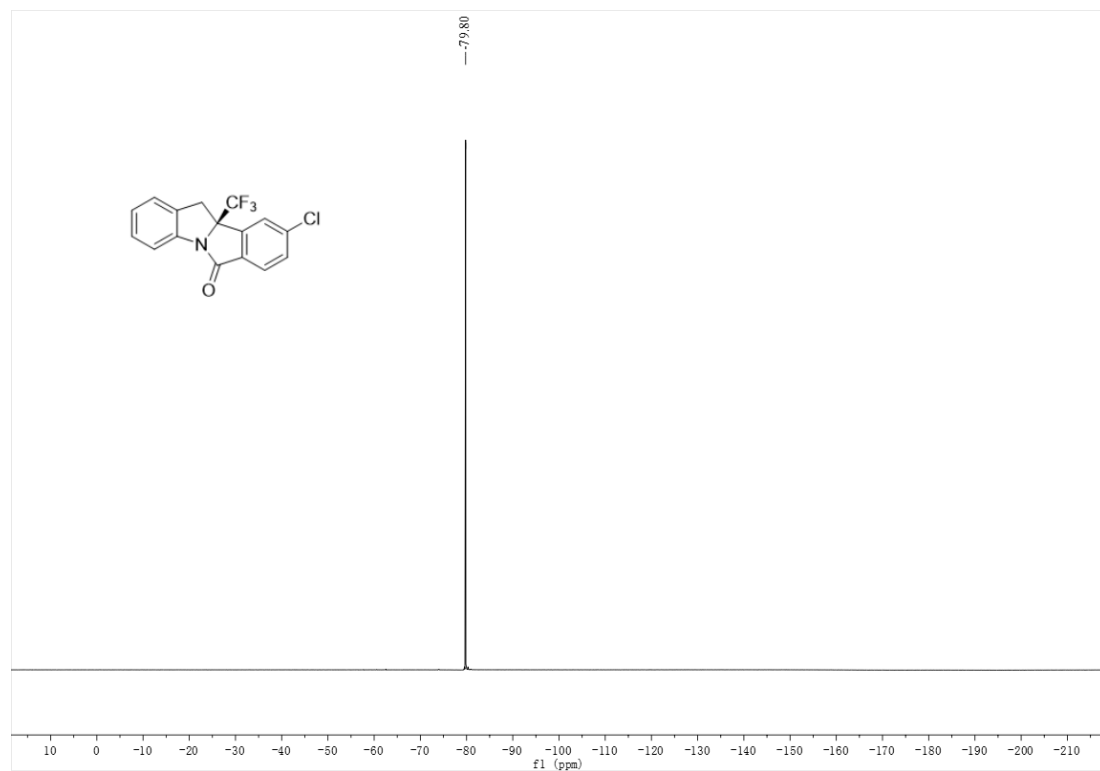

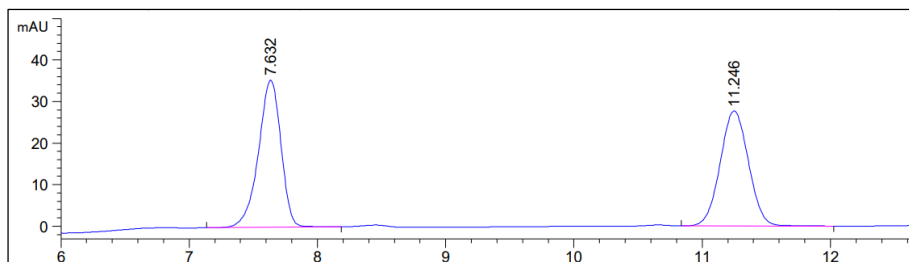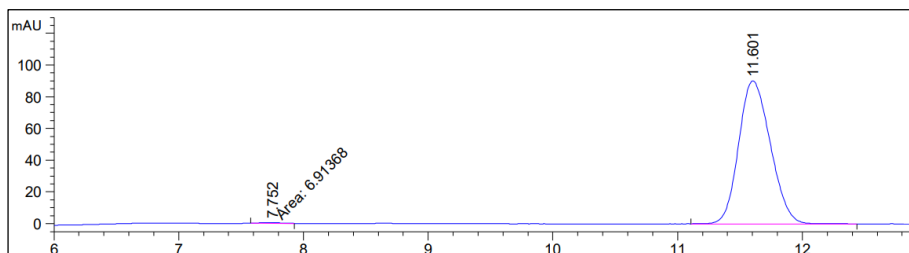

| Peak # | RetTime [min] | Type | Width [min] | Area [mAU*s] | Height [mAU] | Area %  |
|--------|---------------|------|-------------|--------------|--------------|---------|
| 1      | 7.752         | MM   | 0.2034      | 6.91368      | 5.66398e-1   | 0.4328  |
| 2      | 11.601        | BB   | 0.2780      | 1590.40479   | 90.08007     | 99.5672 |

**(R)-9-fluoro-10b-(trifluoromethyl)-10b,11-dihydro-6H-isindolo[2,1-a]indol-6-one (2e):**

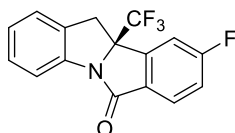

Purified by chromatography on silica gel, eluting with ethyl acetate/petroleum ether 1:50 (v/v); white solid (48% yield), m.p. 118-120 °C.  $[\alpha]_D^{20} = +137.4$  (c 0.5,  $\text{CH}_2\text{Cl}_2$ ), 95% ee [Daicel Chiralpak C1 column (25 cm  $\times$  0.46 cm ID), "hexane/*i*PrOH = 90/10, 0.7 mL/min, 280 nm;  $t_{\text{minor}} = 8.7$  min,  $t_{\text{major}} = 9.6$  min].  $^1\text{H}$  NMR (400 MHz,  $\text{CDCl}_3$ )  $\delta$  7.90 (dd,  $J = 8.4, 5.0$  Hz, 1H), 7.68 (d,  $J = 7.8$  Hz, 1H), 7.33-7.27 (m, 3H), 7.23 (d,  $J = 7.5$  Hz, 1H), 7.12 (t,  $J = 7.5$  Hz, 1H), 3.71 (d,  $J = 16.5$  Hz, 1H), 3.44 (d,  $J = 16.5$  Hz, 1H).  $^{13}\text{C}$  NMR (100 MHz,  $\text{CDCl}_3$ )  $\delta$  168.6, 166.1 (d,  $J = 254.0$  Hz), 145.1, 145.0, 140.7, 132.8, 129.4 (d,  $J = 10.0$  Hz), 128.5, 127.7 (d,  $J = 40.0$  Hz), 125.3 (d,  $J = 37.0$  Hz), 125.0 (q,  $J = 283.0$  Hz), 118.6 (d,  $J = 23.0$  Hz), 116.7, 111.5 (d,  $J = 25.0$  Hz), 74.8 (q,  $J = 30.0$  Hz), 34.6.  $^{19}\text{F}$  NMR (377 MHz,  $\text{CDCl}_3$ )  $\delta$  -79.9, -102.7 ppm. HRMS  $m/z$  (ESI<sup>+</sup>): Calcd for  $\text{C}_{16}\text{H}_9\text{F}_4\text{NONa}^+$  ( $\text{M}+\text{Na}$ )<sup>+</sup> 330.0513, found 330.0513.

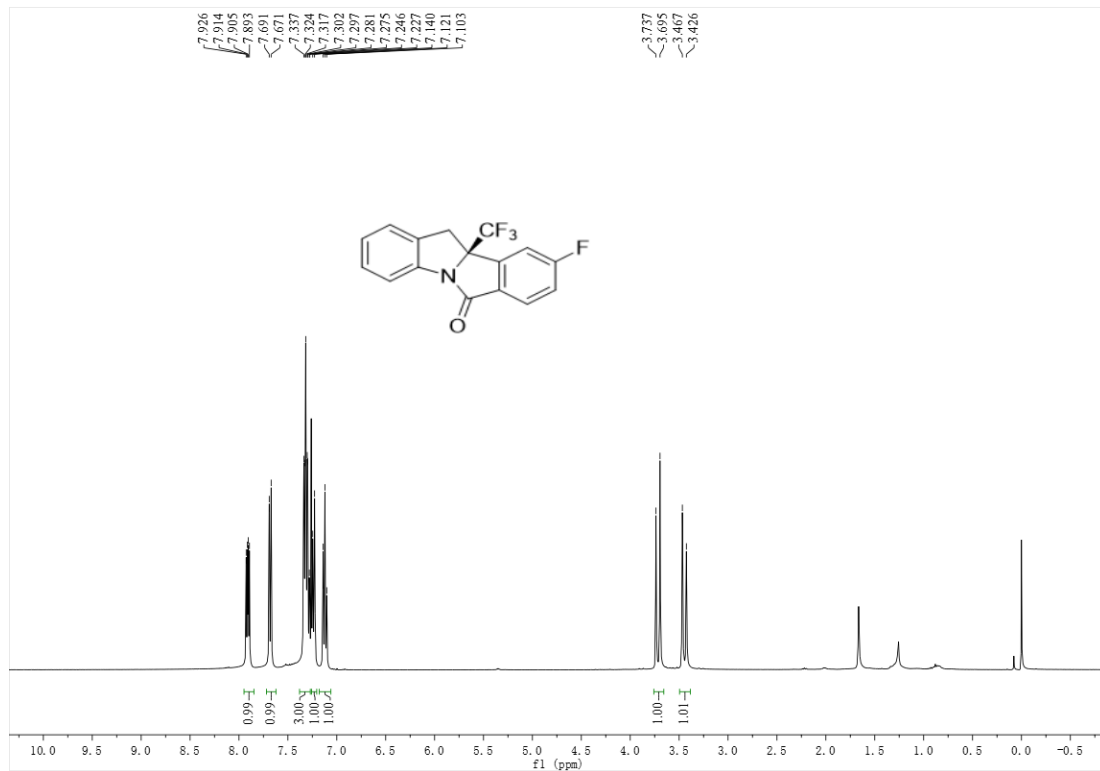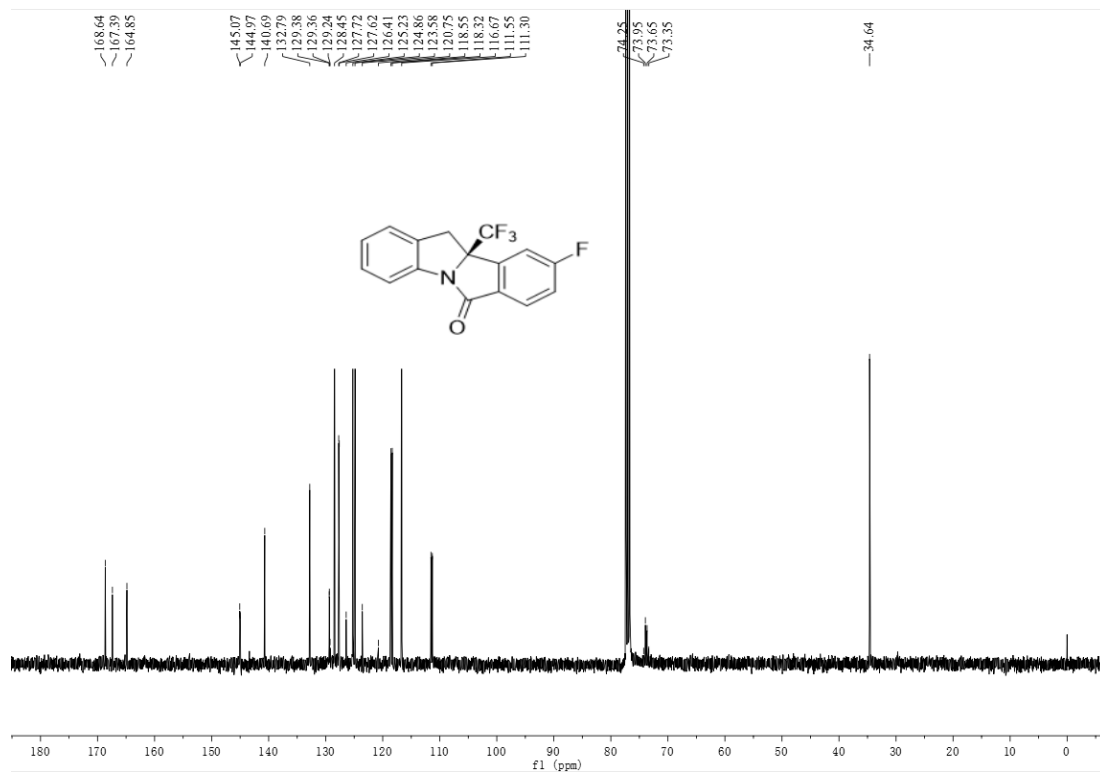

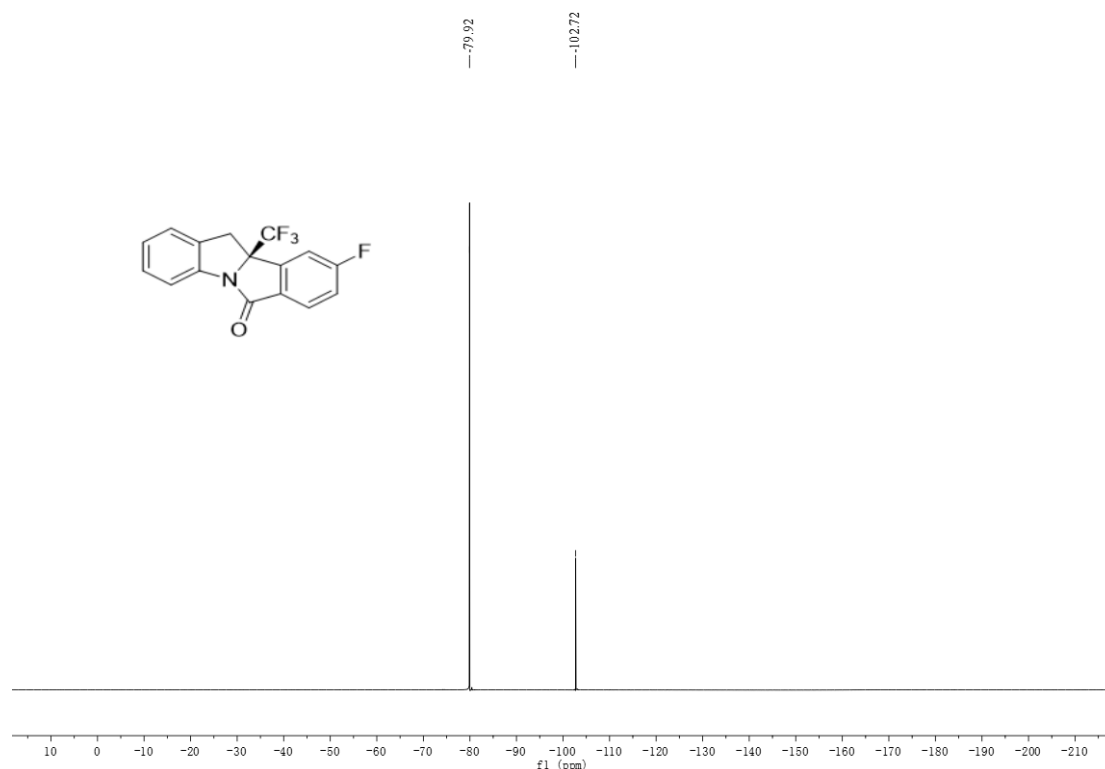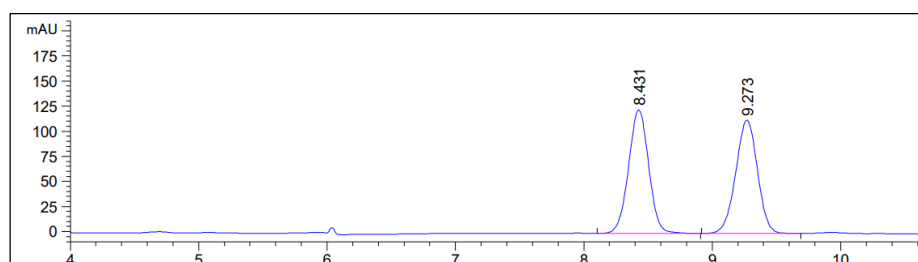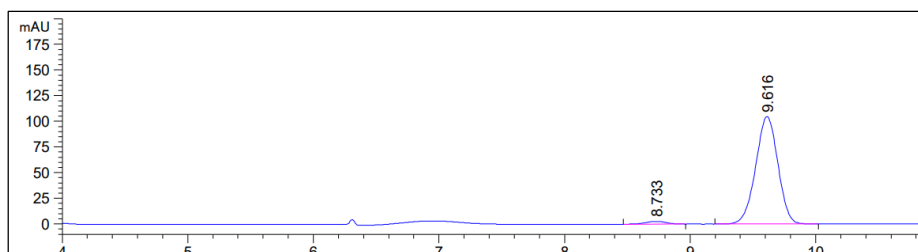

| Peak # | RetTime [min] | Type | Width [min] | Area [mAU*s] | Height [mAU] | Area %  |
|--------|---------------|------|-------------|--------------|--------------|---------|
| 1      | 8.733         | BB   | 0.1692      | 30.54169     | 2.71653      | 2.3168  |
| 2      | 9.616         | BB   | 0.1917      | 1287.71155   | 104.58039    | 97.6832 |

***(R)*-9-Trifluoromethyl-10b-(trifluoromethyl)-10b,11-dihydro-6H-isoindolo[2,1-a]indol-6-one (2f):**

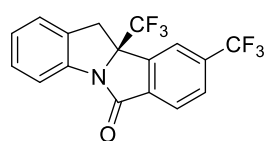

Purified by chromatography on silica gel, eluting with ethyl acetate/petroleum ether 1:50 (v/v); white solid (51% yield), m.p. 111-113 °C.  $[\alpha]_D^{20} = +164.5$  (c 0.5, CH<sub>2</sub>Cl<sub>2</sub>), 99% ee [Daicel Chiralpak OJ-H column (25 cm × 0.46 cm ID), "hexane"/PrOH = 90/10, 0.6 mL/min, 280 nm;  $t_{\text{major}} = 9.2$  min,  $t_{\text{minor}} = 11.1$  min]. <sup>1</sup>H NMR (400 MHz,



CDCl<sub>3</sub>)  $\delta$  8.04 (d,  $J = 8.3$  Hz, 1H), 7.90-7.88 (m, 2H), 7.70 (d,  $J = 7.8$  Hz, 1H), 7.33 (t,  $J = 7.7$  Hz, 1H), 7.26 (d,  $J = 7.3$  Hz, 1H), 7.14 (t,  $J = 7.4$  Hz, 1H), 3.77 (d,  $J = 16.5$  Hz, 1H), 3.48 (d,  $J = 16.5$  Hz, 1H). <sup>13</sup>C NMR (100 MHz, CDCl<sub>3</sub>)  $\delta$  167.9, 142.9, 140.2, 136.8, 135.5 (q,  $J = 33.0$  Hz), 133.0, 129.2, 128.6, 128.0 (q,  $J = 4.0$  Hz), 126.1, 125.6, 125.0, 124.9 (q,  $J = 282.0$  Hz), 123.3 (q,  $J = 271.0$  Hz), 116.7, 74.5 (q,  $J = 30.0$  Hz), 34.6. <sup>19</sup>F NMR (377 MHz, CDCl<sub>3</sub>)  $\delta$  -62.6, -79.7 ppm. HRMS  $m/z$  (ESI+): Calcd for C<sub>17</sub>H<sub>9</sub>F<sub>6</sub>NONa<sup>+</sup> (M+Na)<sup>+</sup> 380.0481, found 380.0481.

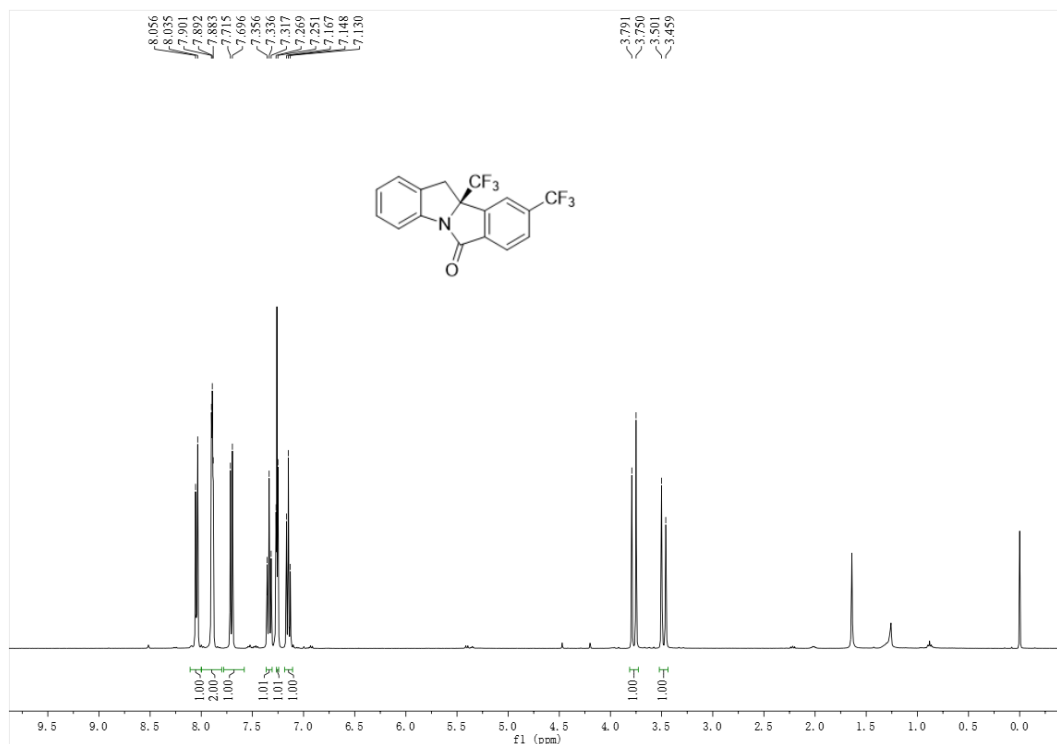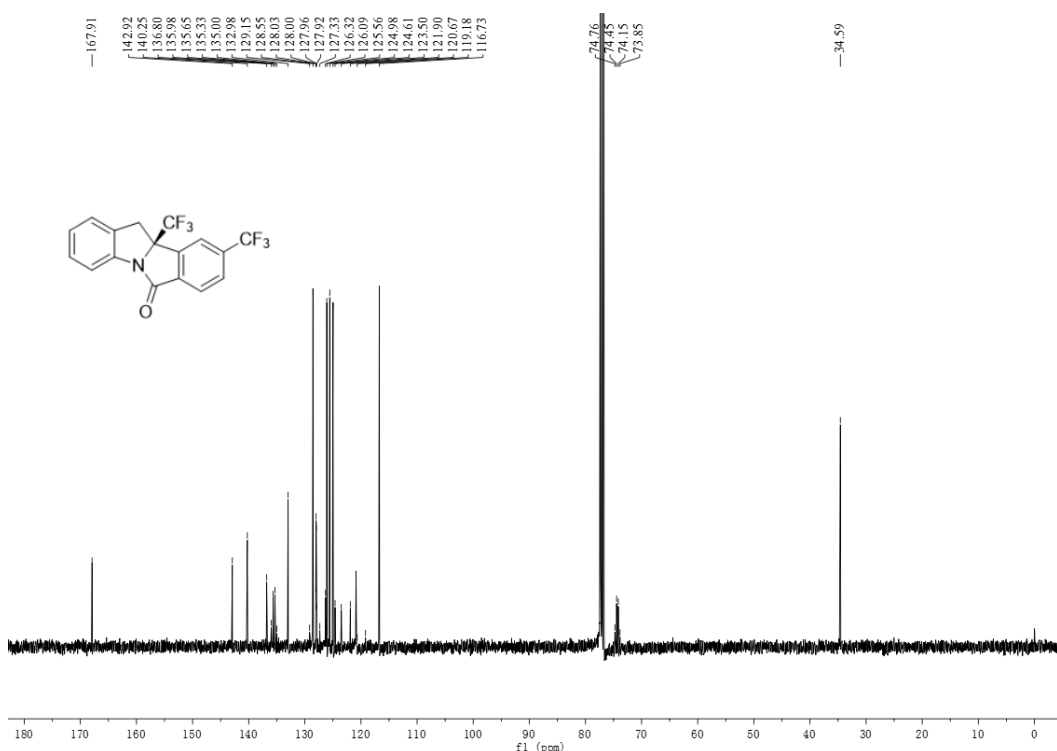

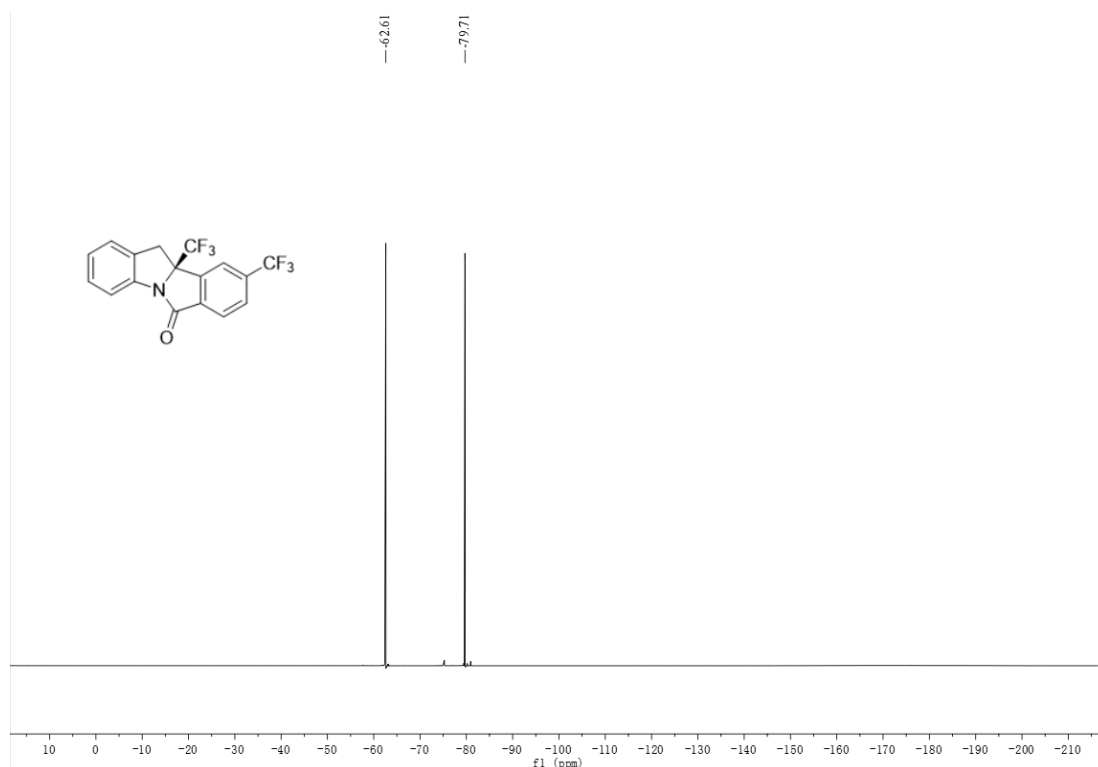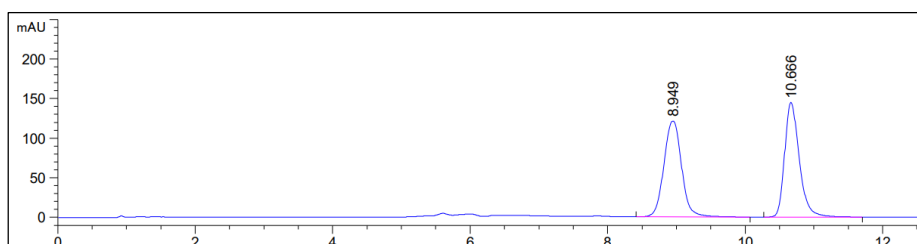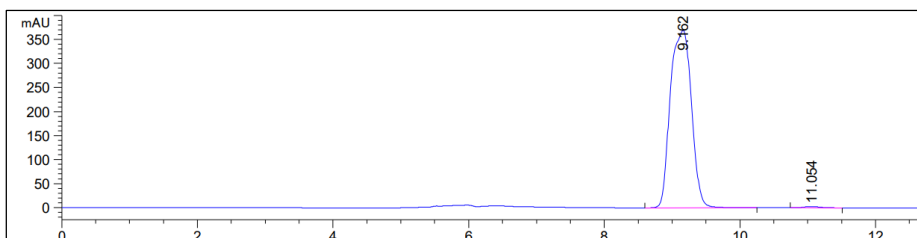

| Peak # | RetTime [min] | Type | Width [min] | Area [mAU*s] | Height [mAU] | Area %  |
|--------|---------------|------|-------------|--------------|--------------|---------|
| 1      | 9.162         | BB   | 0.3039      | 7975.59277   | 369.42911    | 99.4798 |
| 2      | 11.054        | BB   | 0.2427      | 41.70782     | 2.63448      | 0.5202  |

**(R)-8-methyl-10b-(trifluoromethyl)-10b,11-dihydro-6H-isoindolo[2,1-a]indol-6-one (2g):**

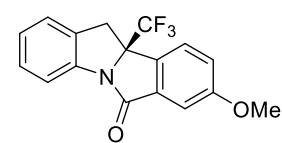

Purified by chromatography on silica gel, eluting with ethyl acetate/petroleum ether 1:50 (v/v); colorless oil (68% yield).  $[\alpha]_D^{20} = +119.2$  (c 0.5,  $\text{CH}_2\text{Cl}_2$ ), 91% ee [Daicel Chiralpak C1 column (25 cm  $\times$  0.46 cm ID),  $n$ -hexane/*i*PrOH = 90/10, 0.7 mL/min, 280 nm;  $t_{\text{minor}} = 9.2$  min,  $t_{\text{major}} = 10.9$  min].  $^1\text{H NMR}$  (400 MHz,  $\text{CDCl}_3$ )  $\delta$  7.68

(d,  $J = 8.0$  Hz, 1H), 7.50 (d,  $J = 8.4$  Hz, 1H), 7.36 (d,  $J = 2.8$  Hz, 1H), 7.30 (t,  $J = 7.7$  Hz, 1H), 7.22-7.18 (m, 2H), 7.10 (t,  $J = 7.2$  Hz, 1H), 3.88 (s, 3H), 3.68 (d,  $J = 16.5$  Hz, 1H), 3.40 (d,  $J = 16.4$  Hz, 1H).  $^{13}\text{C}$  NMR (100 MHz,  $\text{CDCl}_3$ )  $\delta$  169.7, 161.7, 140.7, 135.0, 134.8, 133.5, 128.3, 125.3 (q,  $J = 282.0$  Hz), 125.1, 124.9, 124.5, 121.7, 116.6, 108.1, 73.8 (q,  $J = 30.0$  Hz), 55.9, 34.8.  $^{19}\text{F}$  NMR (377 MHz,  $\text{CDCl}_3$ )  $\delta$  -80.1 ppm. HRMS  $m/z$  (ESI+): Calcd for  $\text{C}_{17}\text{H}_{12}\text{F}_3\text{NONa}^+$  ( $\text{M}+\text{Na}$ ) $^+$  342.0712, found 342.0714.

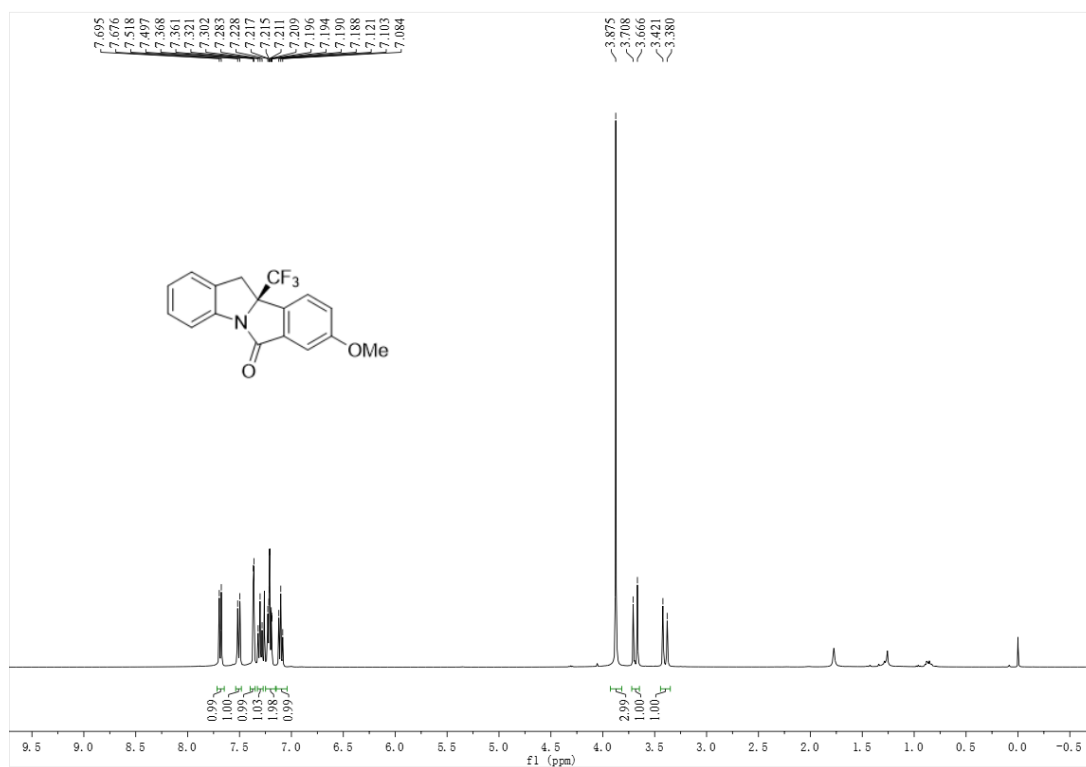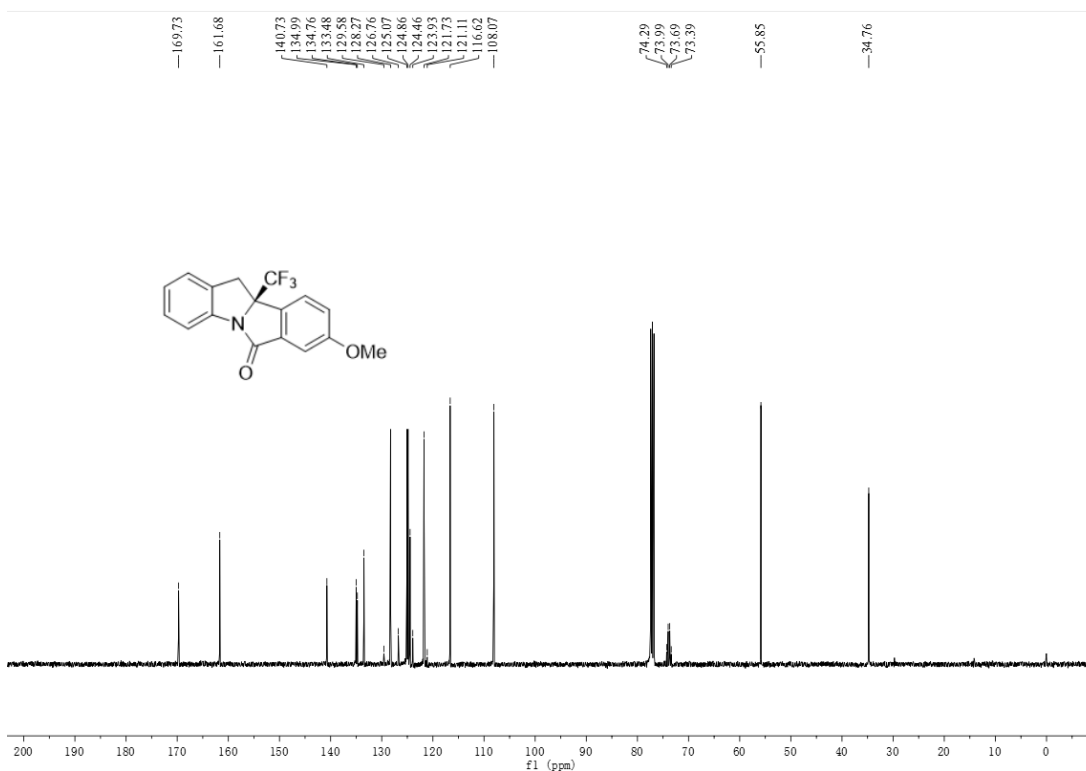

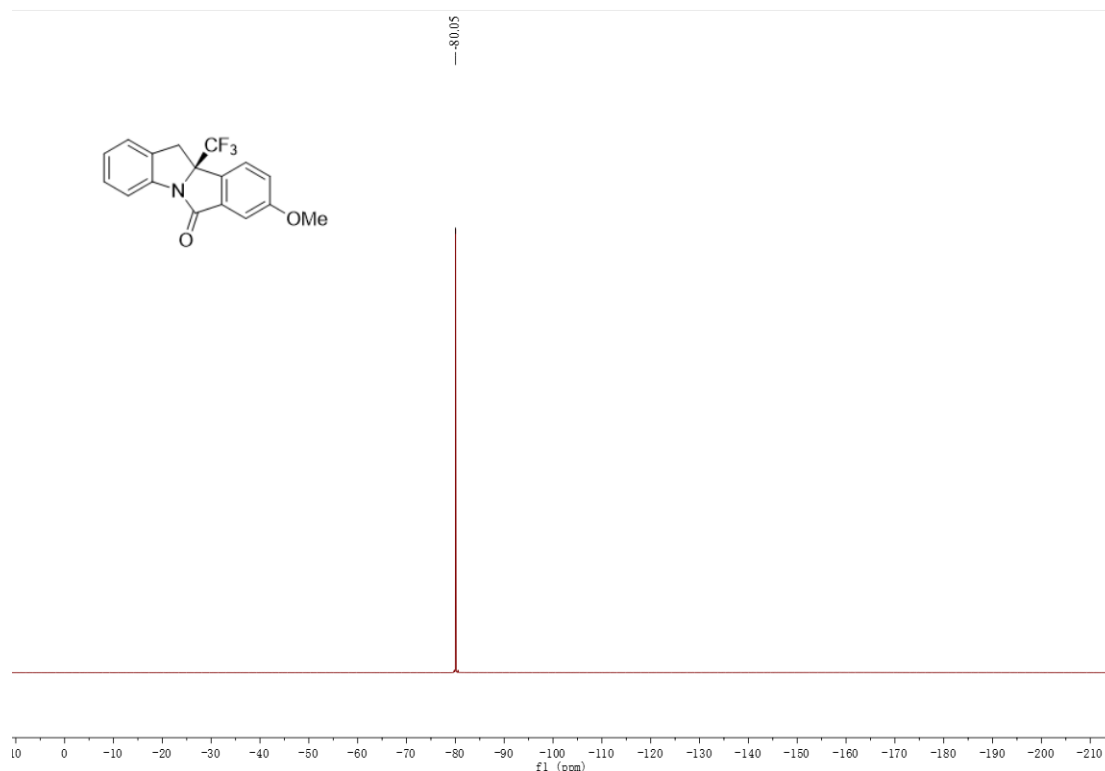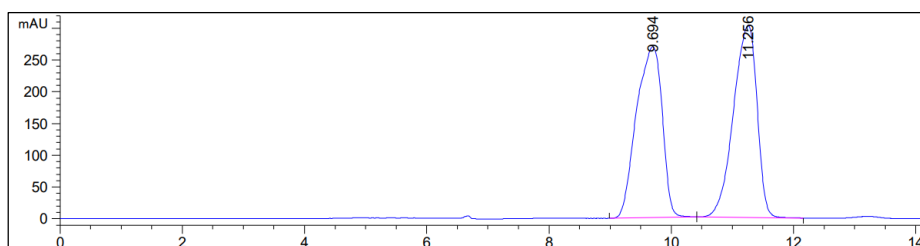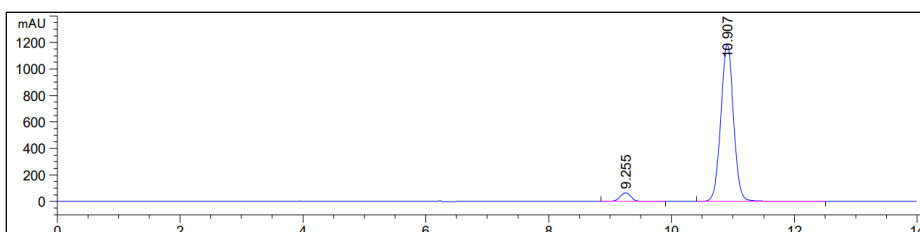

| Peak # | RetTime [min] | Type | Width [min] | Area [mAU*s] | Height [mAU] | Area %  |
|--------|---------------|------|-------------|--------------|--------------|---------|
| 1      | 9.255         | BB   | 0.1849      | 773.66467    | 64.98856     | 4.3535  |
| 2      | 10.907        | BB   | 0.2209      | 1.69975e4    | 1188.04724   | 95.6465 |

**(R)-8-methyl-10b-(trifluoromethyl)-10b,11-dihydro-6H-isoindolo[2,1-a]indol-6-one (2h):**

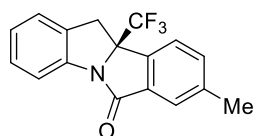

Purified by chromatography on silica gel, eluting with ethyl acetate/petroleum ether 1:50 (v/v); colorless oil (71% yield).  $[\alpha]_D^{20} = +179.0$  (c 0.5,  $\text{CH}_2\text{Cl}_2$ ), 98% ee [Daicel Chiralpak C1 column (25 cm  $\times$  0.46 cm ID), "hexane/iPrOH = 90/10, 0.7 mL/min, 280 nm;  $t_{\text{minor}} = 8.2$  min,  $t_{\text{major}} = 10.0$  min].  $^1\text{H NMR}$  (600 MHz,  $\text{CDCl}_3$ )  $\delta$  7.69 (t,  $J = 7.8$  Hz, 2H), 7.50 (d,  $J = 7.8$  Hz, 1H), 7.47 (d,  $J = 7.8$  Hz, 1H), 7.29 (t,  $J = 7.8$

Hz, 1H), 7.21 (d,  $J = 7.8$  Hz, 1H), 7.09 (t,  $J = 7.5$  Hz, 1H), 3.69 (d,  $J = 16.4$  Hz, 1H), 3.40 (d,  $J = 16.4$  Hz, 1H), 2.46 (s, 3H).  $^{13}\text{C}$  NMR (100 MHz,  $\text{CDCl}_3$ )  $\delta$  170.0, 141.0, 140.8, 140.0, 134.7, 133.5, 133.4, 128.3, 125.6, 125.3 (q,  $J = 282.0$  Hz), 125.0, 124.8, 123.3, 116.6, 74.0 (q,  $J = 30.0$  Hz), 34.8, 21.4.  $^{19}\text{F}$  NMR (377 MHz,  $\text{CDCl}_3$ )  $\delta$  -80.0 ppm. HRMS  $m/z$  (ESI+): Calcd for  $\text{C}_{17}\text{H}_{12}\text{F}_3\text{NONa}^+$  ( $\text{M}+\text{Na}$ ) $^+$  326.0763, found 326.0764.

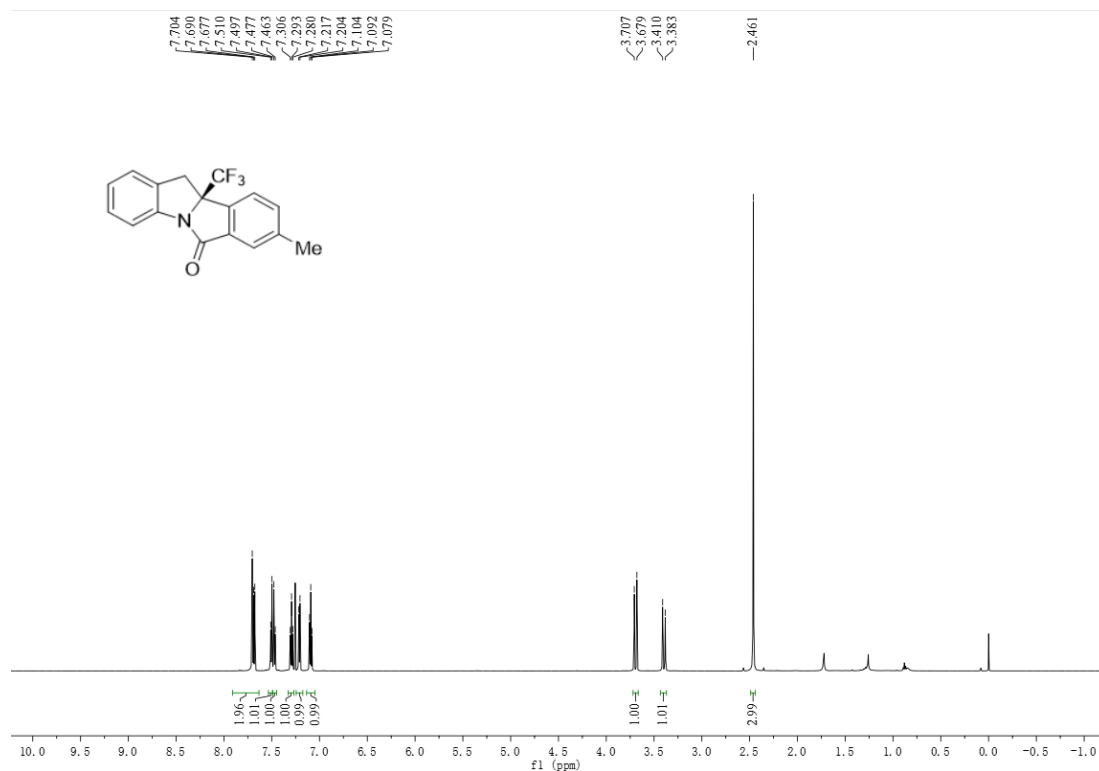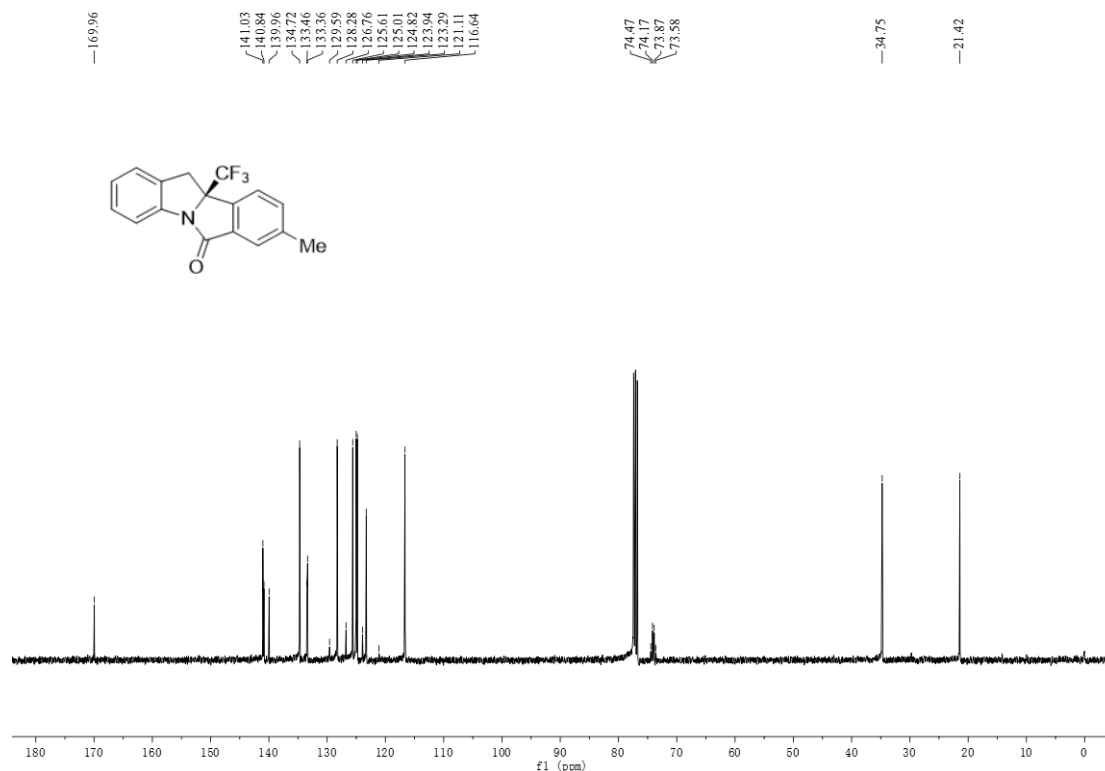

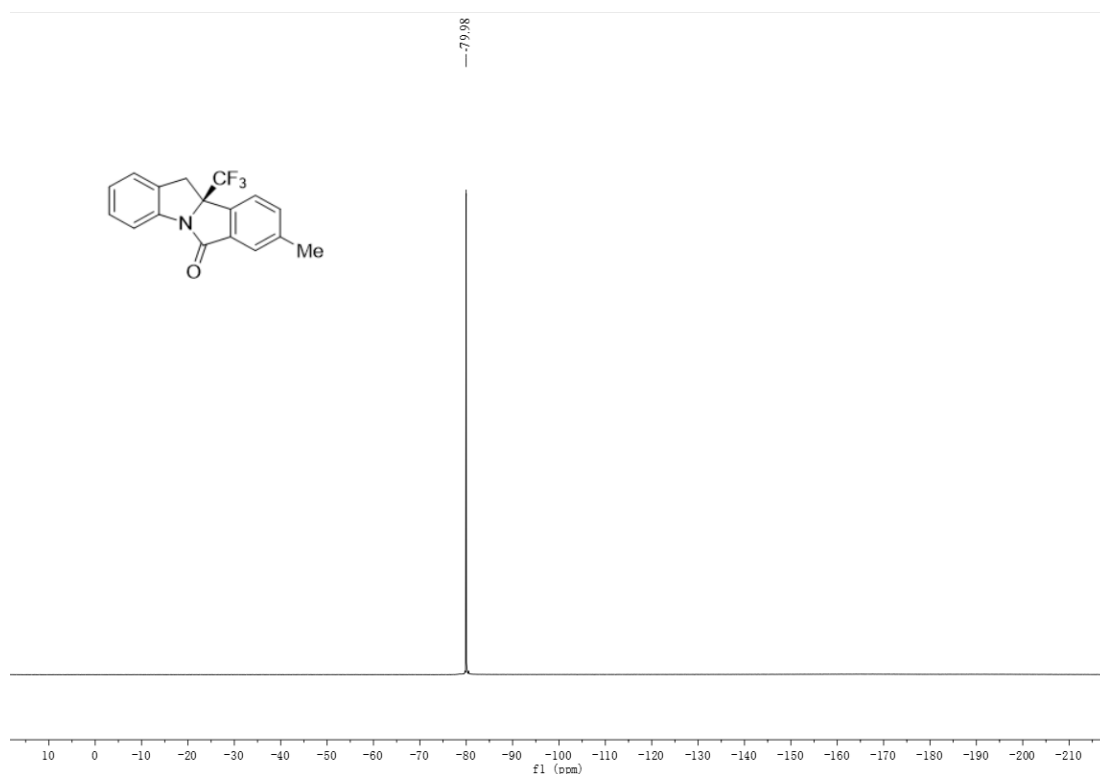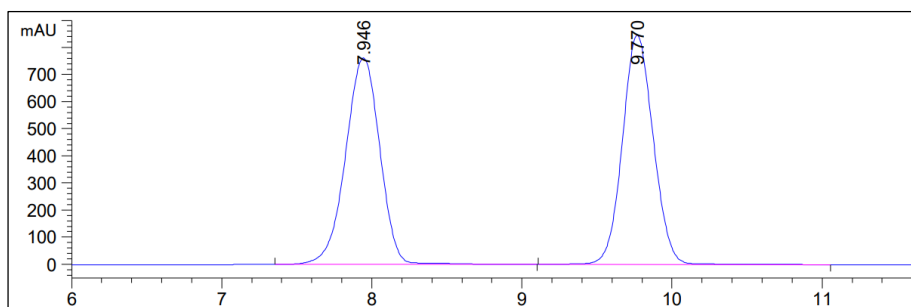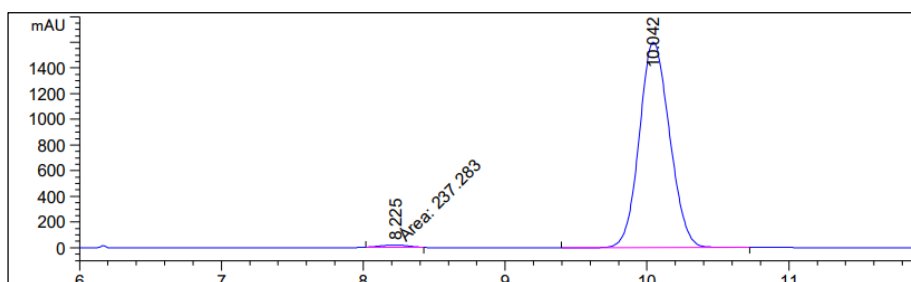

| Peak # | RetTime [min] | Type | Width [min] | Area [mAU*s] | Height [mAU] | Area %  |
|--------|---------------|------|-------------|--------------|--------------|---------|
| 1      | 8.225         | MM   | 0.2203      | 237.28329    | 17.95410     | 0.9909  |
| 2      | 10.042        | BB   | 0.2288      | 2.37095e4    | 1601.03760   | 99.0091 |

**(R)-8-chloro-10b-(trifluoromethyl)-10b,11-dihydro-6H-isoindolo[2,1-a]indol-6-one (2i):**

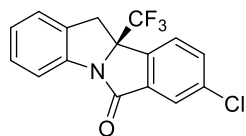

Purified by chromatography on silica gel, eluting with ethyl acetate/petroleum ether 1:50 (v/v); white solid (65% yield), m.p. 102-104 °C.  $[\alpha]_D^{20} = +82.4$  (c 0.5,  $\text{CH}_2\text{Cl}_2$ ), 99% ee [Daicel Chiralpak AD-H column (25 cm  $\times$  0.46 cm ID),  $n$ -hexane/ $i$ PrOH = 80/20, 0.6 mL/min, 280 nm;  $t_{\text{minor}} = 10.5$  min,  $t_{\text{major}} = 13.5$  min].  $^1\text{H}$  NMR (400 MHz,  $\text{CDCl}_3$ )  $\delta$  7.88 (s, 1H), 7.69-7.63 (m, 2H), 7.57 (d,  $J = 8.2$  Hz, 1H), 7.31 (t,  $J = 7.7$  Hz, 1H), 7.23 (d,  $J = 7.5$  Hz, 1H), 7.12 (d,  $J = 7.5$  Hz, 1H), 3.71 (d,  $J = 16.5$  Hz, 1H), 3.43 (d,  $J = 16.5$  Hz, 1H).  $^{13}\text{C}$  NMR (100 MHz,  $\text{CDCl}_3$ )  $\delta$  168.2, 140.7, 140.4, 137.1, 135.3, 133.9, 133.1, 128.5, 125.5, 125.4, 125.0 (q,  $J = 282.0$  Hz), 124.9, 124.8, 116.7, 74.0 (q,  $J = 30.0$  Hz), 34.6.  $^{19}\text{F}$  NMR (377 MHz,  $\text{CDCl}_3$ )  $\delta$  -79.9 ppm. HRMS  $m/z$  (ESI+): Calcd for  $\text{C}_{16}\text{H}_9\text{ClF}_3\text{NONa}^+$  ( $\text{M}+\text{Na}$ ) $^+$  346.0217, found 346.0216.

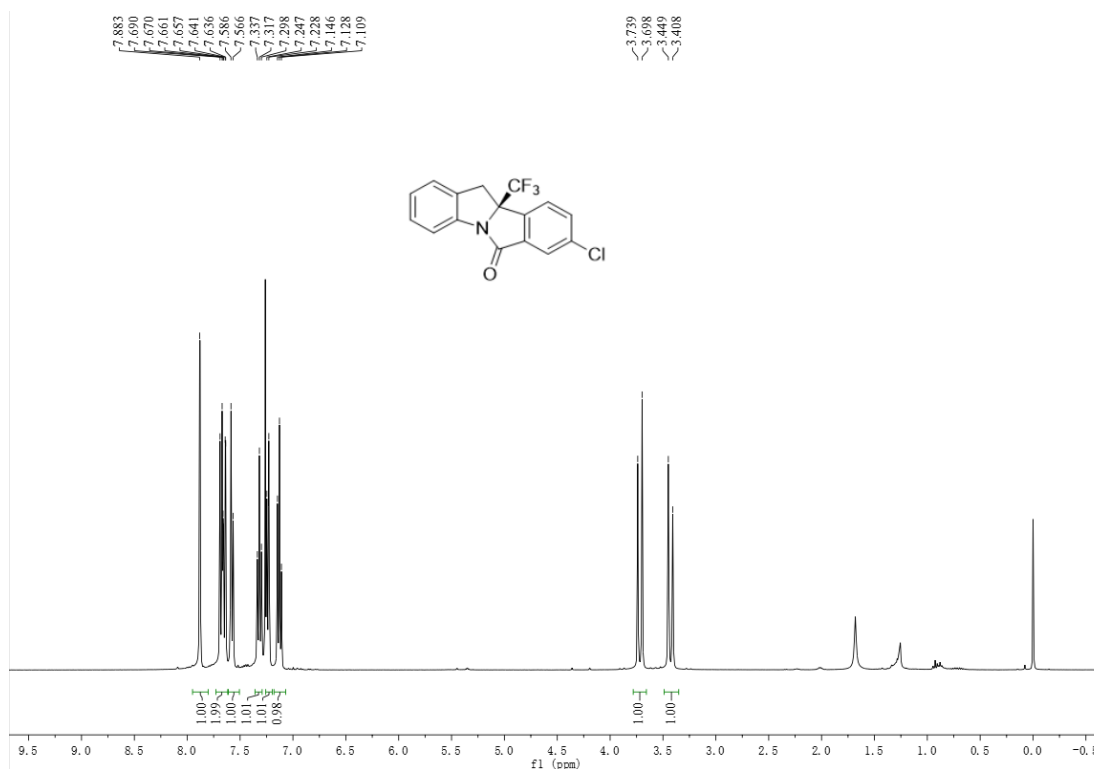

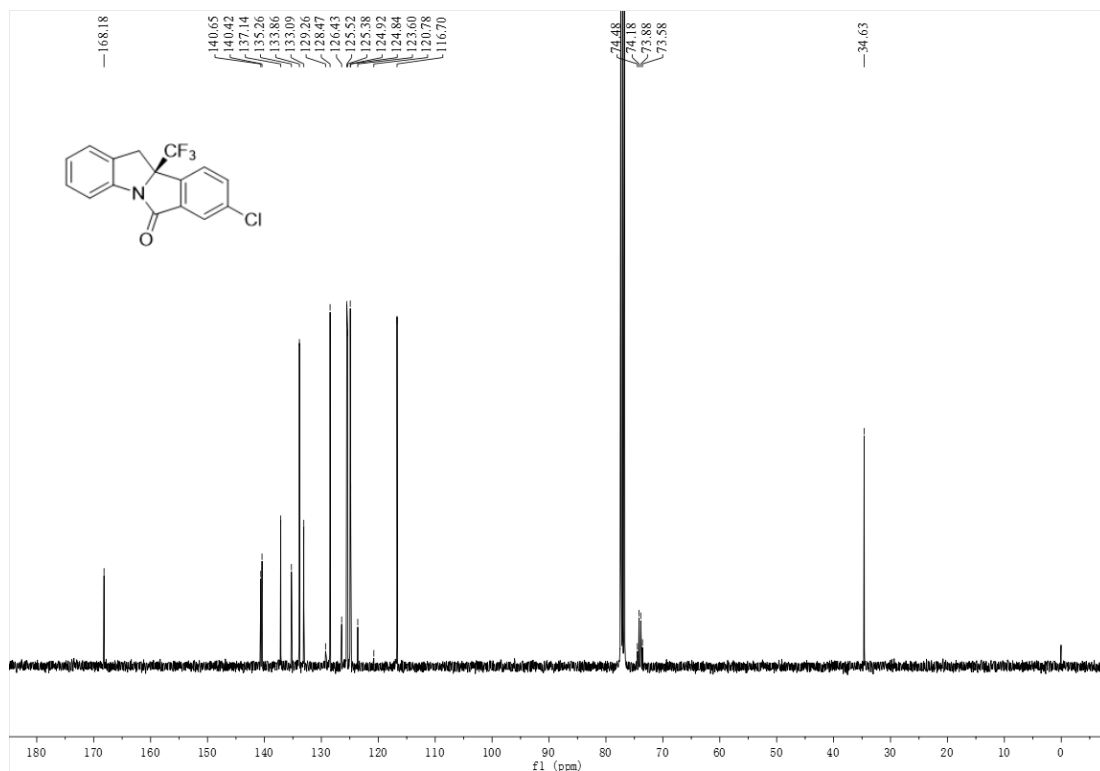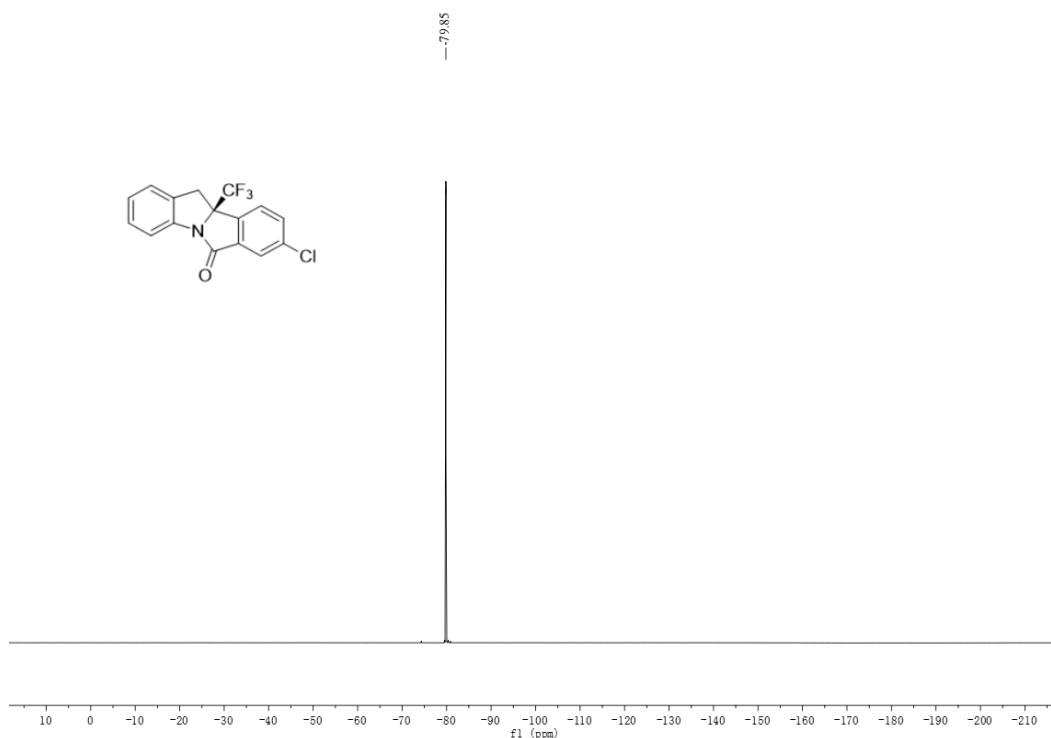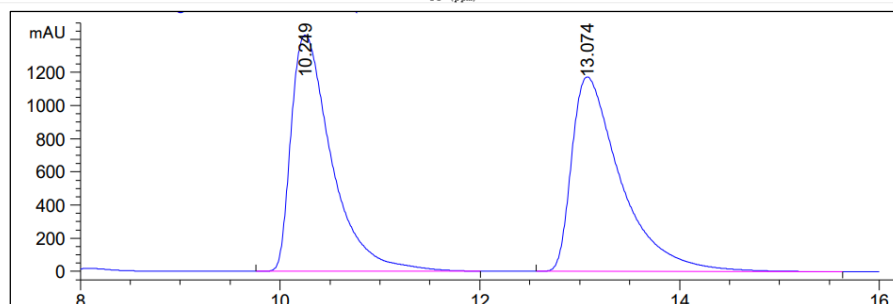



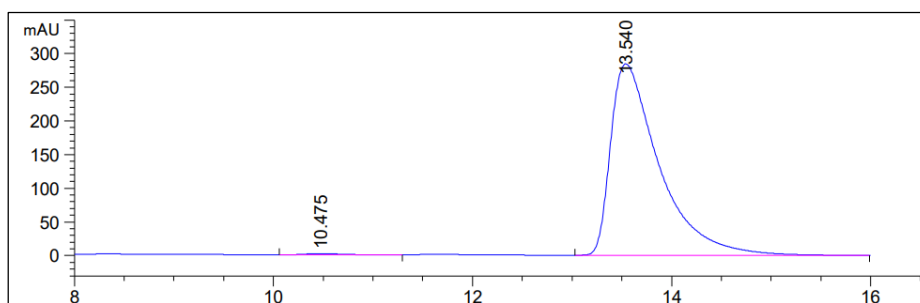

| Peak # | RetTime [min] | Type | Width [min] | Area [mAU*s] | Height [mAU] | Area %  |
|--------|---------------|------|-------------|--------------|--------------|---------|
| 1      | 10.475        | BB   | 0.3106      | 46.70729     | 1.82469      | 0.4826  |
| 2      | 13.540        | BBA  | 0.5036      | 9631.70410   | 284.08432    | 99.5174 |

**(R)-8-Fluoro-10b-(trifluoromethyl)-10b,11-dihydro-6H-isoindolo[2,1-a]indol-6-one (2j):**

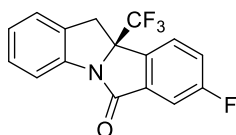

Purified by chromatography on silica gel, eluting with ethyl acetate/petroleum ether 1:50 (v/v); colorless oil (67% yield).  $[\alpha]_D^{20} = +92.0$  (c 0.5,  $\text{CH}_2\text{Cl}_2$ ), 98% ee [Daicel Chiralpak C1 column (25 cm  $\times$  0.46 cm ID),  $n_{\text{hexane}}/i\text{PrOH} = 90/10$ , 0.7 mL/min, 280 nm;  $t_{\text{minor}} = 7.5$  min,  $t_{\text{major}} = 9.3$  min].  $^1\text{H}$  NMR (600 MHz,  $\text{CDCl}_3$ )  $\delta$  7.68 (dd,  $J = 7.9, 1.0$  Hz, 1H), 7.62-7.60 (m, 1H), 7.58 (dd,  $J = 7.2, 2.5$  Hz, 1H), 7.38 (td,  $J = 8.5, 2.5$  Hz, 1H), 7.33-7.30 (m, 1H), 7.13 (td,  $J = 7.5, 1.1$  Hz, 1H), 3.72 (d,  $J = 16.4$  Hz, 1H), 3.43 (d,  $J = 16.4$  Hz, 1H).  $^{13}\text{C}$  NMR (100 MHz,  $\text{CDCl}_3$ )  $\delta$  168.4 (d,  $J = 3.0$  Hz), 161.1 (d,  $J = 250.0$  Hz), 140.5, 138.1 (d,  $J = 2.0$  Hz), 135.9 (d,  $J = 8.0$  Hz), 133.2, 128.4, 125.4, 125.3, 125.1 (q,  $J = 282.0$  Hz), 124.9, 121.2 (d,  $J = 24.0$  Hz), 116.7, 112.4 (d,  $J = 24.0$  Hz), 74.4 (q,  $J = 30.0$  Hz), 34.7.  $^{19}\text{F}$  NMR (377 MHz,  $\text{CDCl}_3$ )  $\delta$  -80.0, -108.9 ppm. HRMS  $m/z$  (ESI+): Calcd for  $\text{C}_{16}\text{H}_9\text{F}_4\text{NONa}^+$  ( $\text{M}+\text{Na}$ ) $^+$  330.0513, found 330.0513.

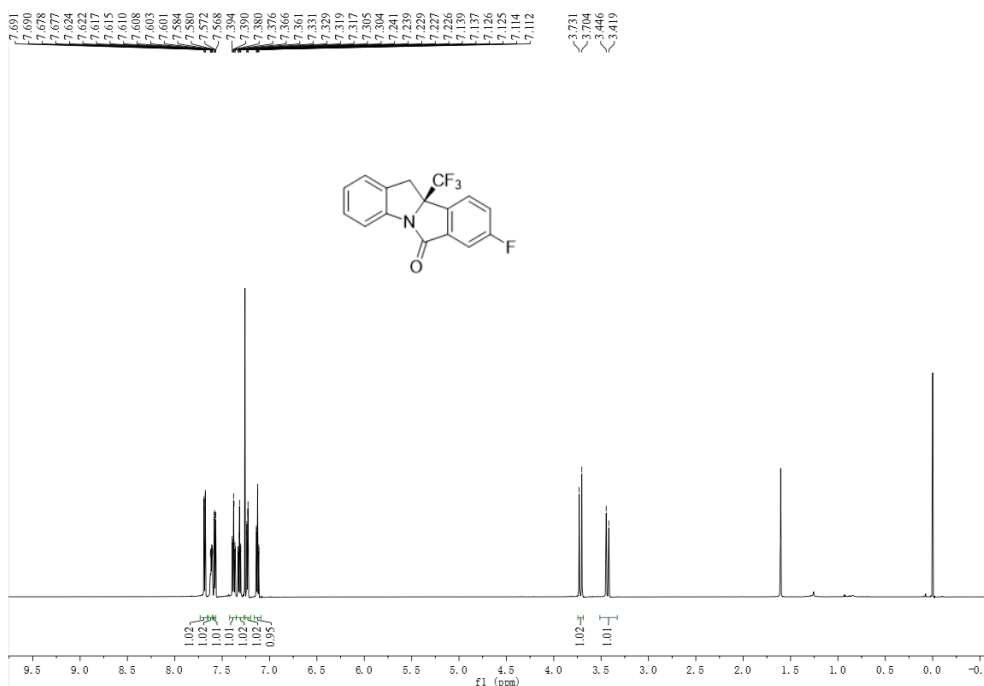

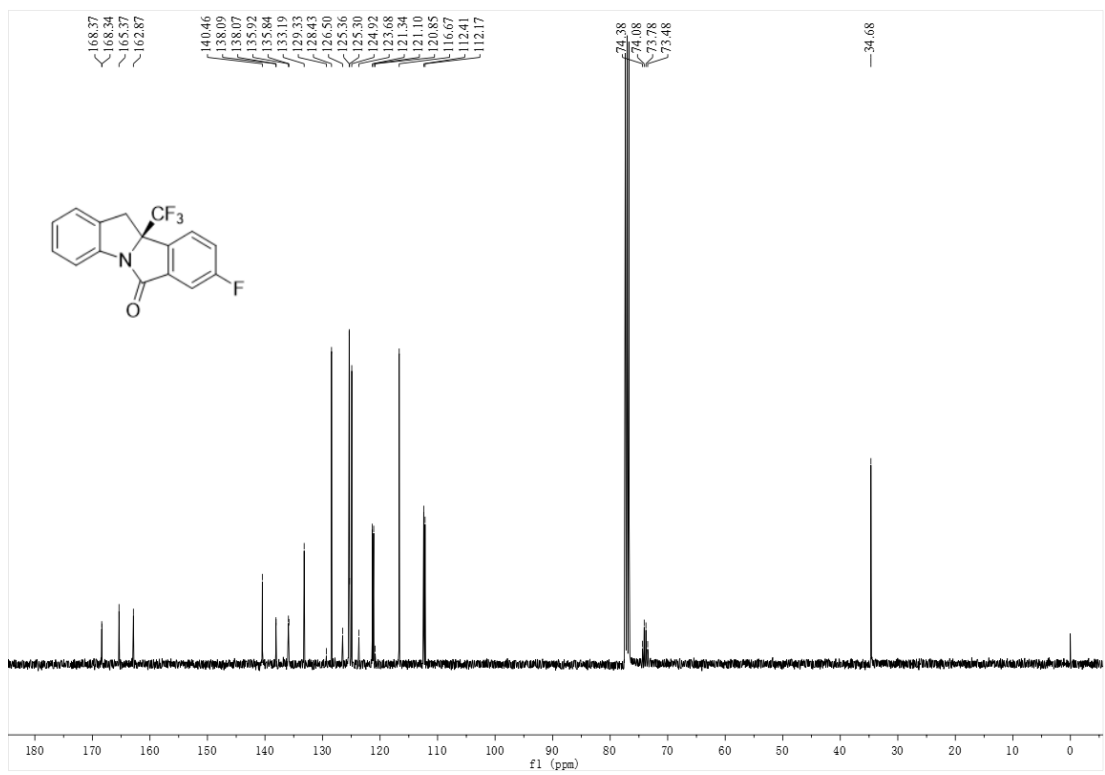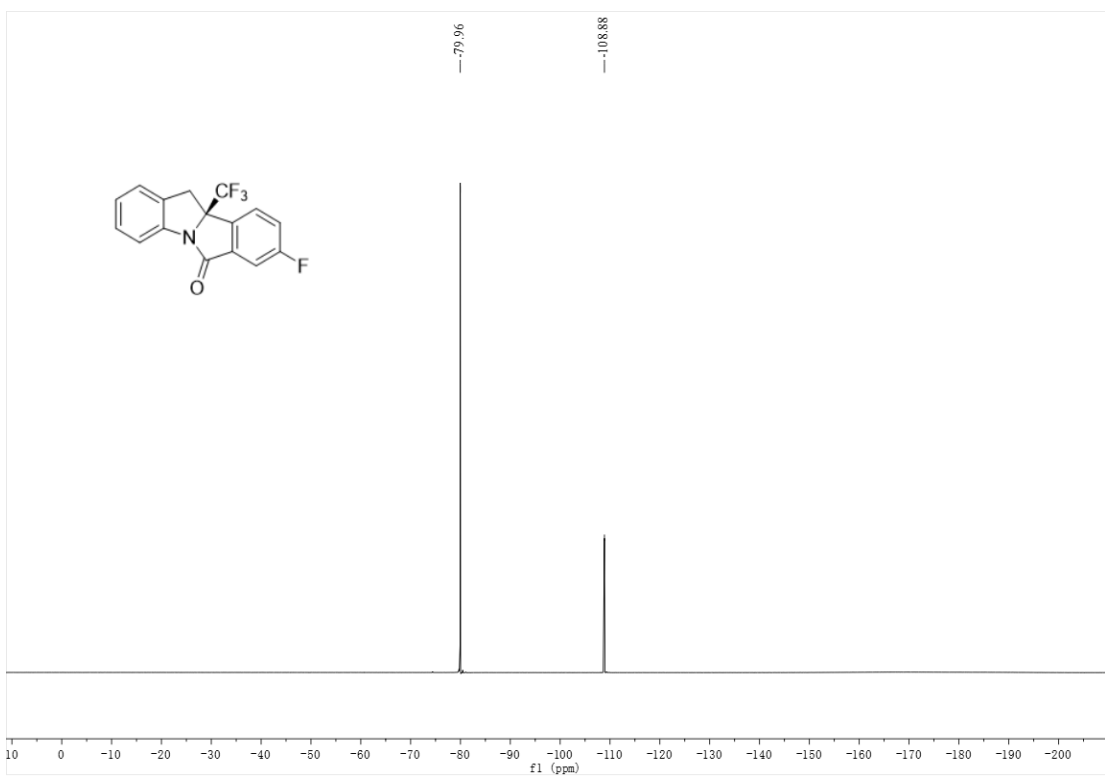

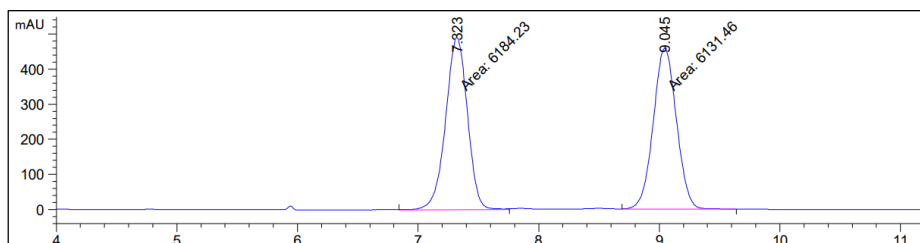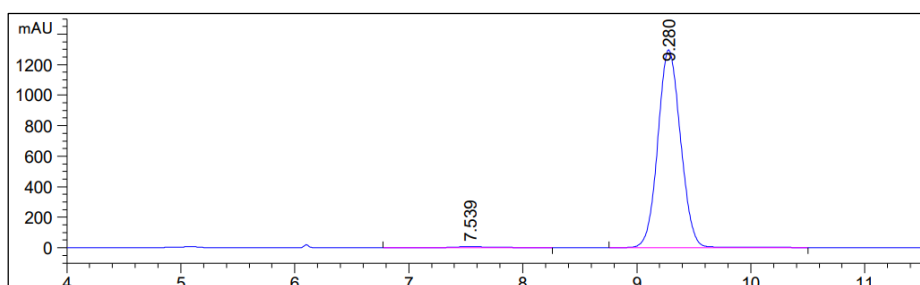

| Peak # | RetTime [min] | Type | Width [min] | Area [mAU*s] | Height [mAU] | Area %  |
|--------|---------------|------|-------------|--------------|--------------|---------|
| 1      | 7.539         | BB   | 0.2811      | 162.63853    | 8.21159      | 0.8985  |
| 2      | 9.280         | BB   | 0.2156      | 1.79388e4    | 1295.12329   | 99.1015 |

**(R)-7-Fluoro-10b-(trifluoromethyl)-10b,11-dihydro-6H-isoindolo[2,1-a]indol-6-one (2k):**

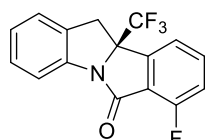

Purified by chromatography on silica gel, eluting with ethyl acetate/petroleum ether 1:50 (v/v); white solid (57% yield), m.p. 105-107 °C.  $[\alpha]_D^{20} = +117.5$  (c 0.5, CH<sub>2</sub>Cl<sub>2</sub>), 99% ee [Daicel Chiralpak C1 column (25 cm × 0.46 cm ID), "hexane/iPrOH = 90/10, 0.7 mL/min, 280 nm;  $t_{\text{minor}} = 10.3$  min,  $t_{\text{major}} = 11.8$  min]. <sup>1</sup>H NMR (400 MHz, CDCl<sub>3</sub>) δ 7.69-7.64 (m, 2H), 7.42 (d,  $J = 7.6$  Hz, 1H), 7.31 (t,  $J = 7.7$  Hz, 1H), 7.24 (t,  $J = 8.0$  Hz, 2H), 7.11 (t,  $J = 7.6$  Hz, 1H), 3.73 (d,  $J = 16.5$  Hz, 1H), 3.46 (d,  $J = 16.5$  Hz, 1H). <sup>13</sup>C NMR (100 MHz, CDCl<sub>3</sub>) δ 166.3 (d,  $J = 3.0$  Hz), 159.4 (d,  $J = 262.0$  Hz), 144.9, 140.7, 135.9 (d,  $J = 8.0$  Hz), 132.8, 128.4, 125.0 (q,  $J = 282.0$  Hz), 125.3, 124.8, 120.6 (d,  $J = 14.0$  Hz), 119.7 (d,  $J = 4.0$  Hz), 118.1 (d,  $J = 19.0$  Hz), 116.8, 74.0 (q,  $J = 30.0$  Hz), 34.8. <sup>19</sup>F NMR (377 MHz, CDCl<sub>3</sub>) δ -80.0, -114.2 ppm. HRMS  $m/z$  (ESI<sup>+</sup>): Calcd for C<sub>16</sub>H<sub>9</sub>F<sub>4</sub>NONa<sup>+</sup> (M+Na)<sup>+</sup> 330.0513, found 330.0513.

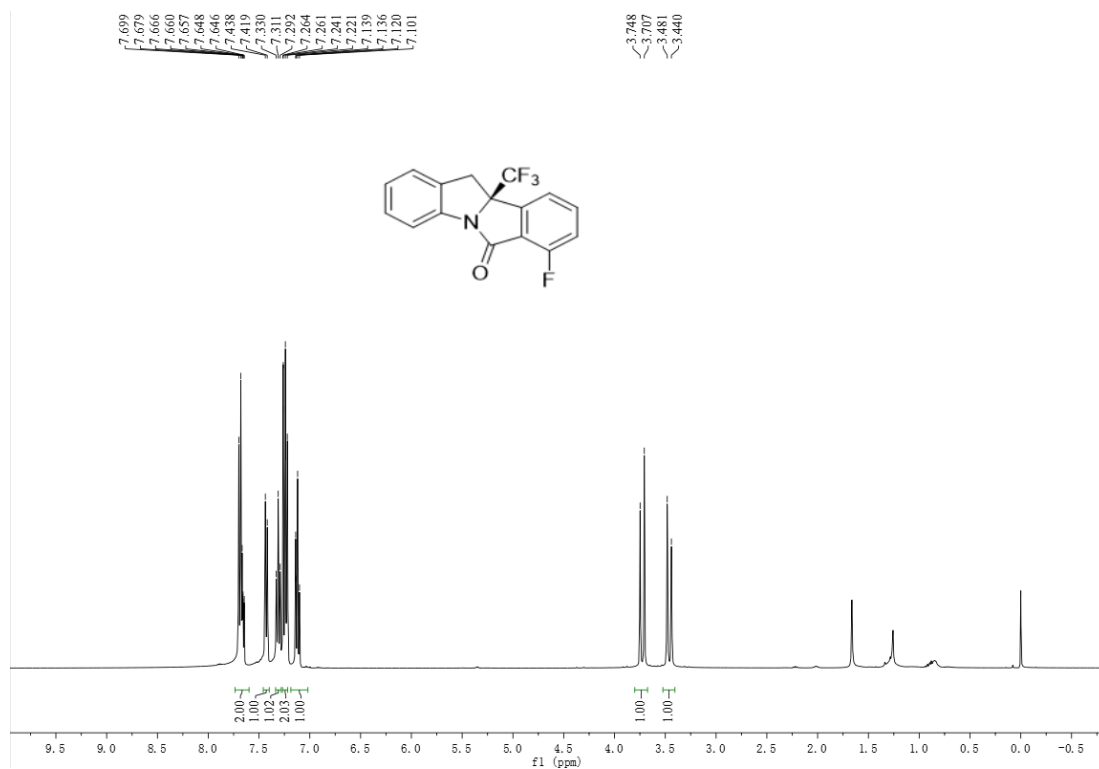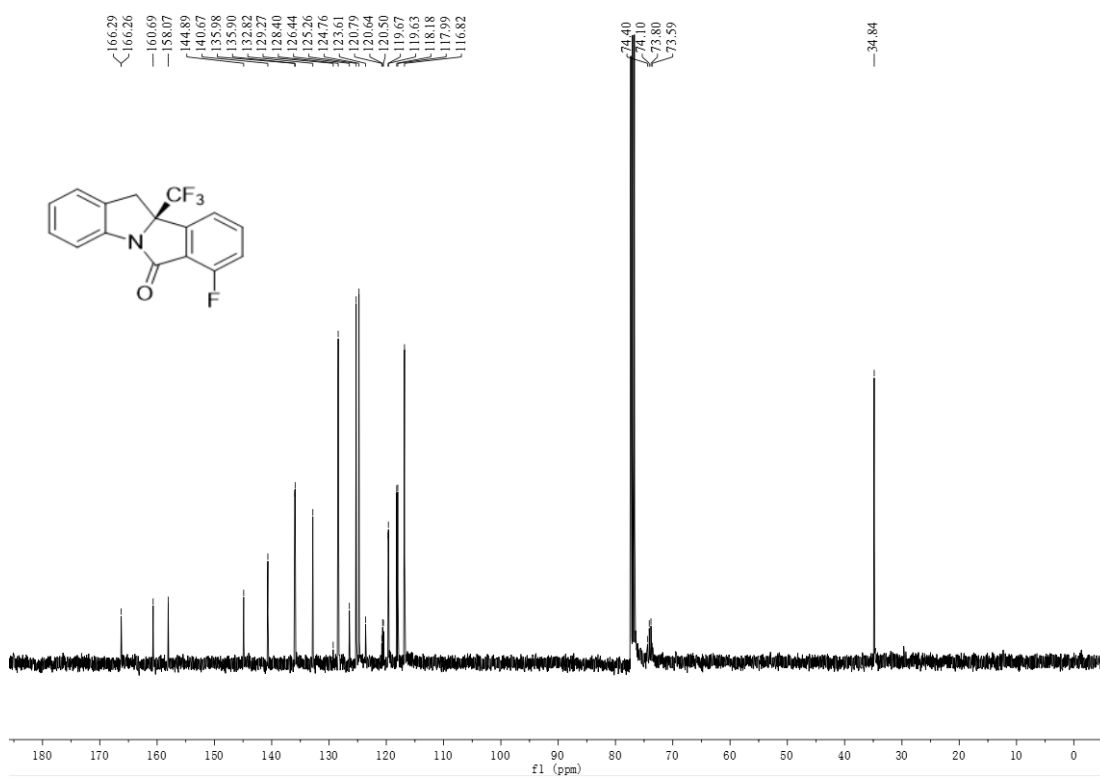

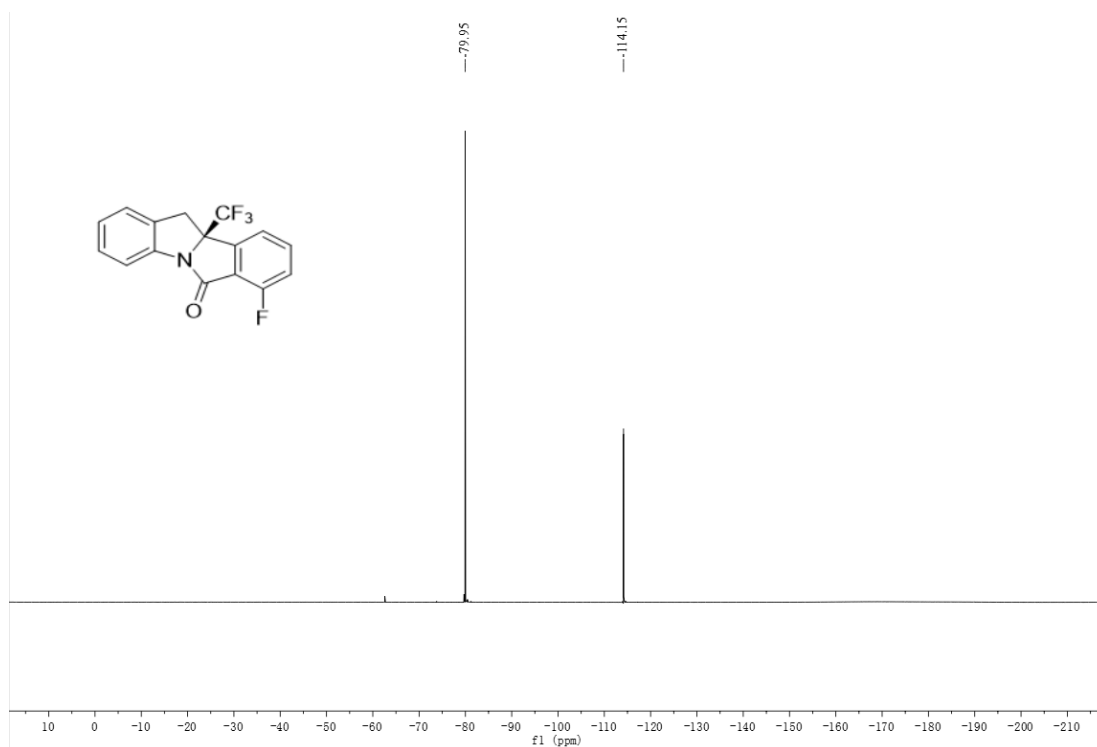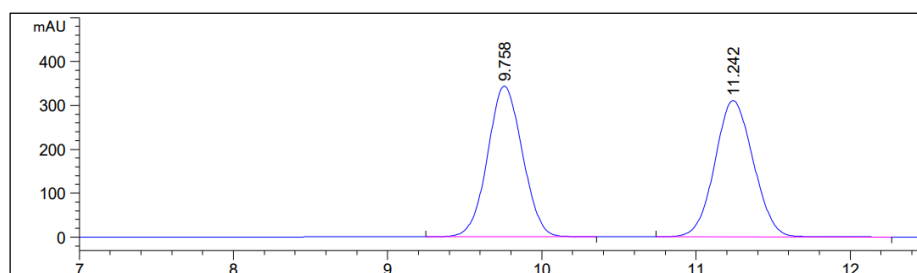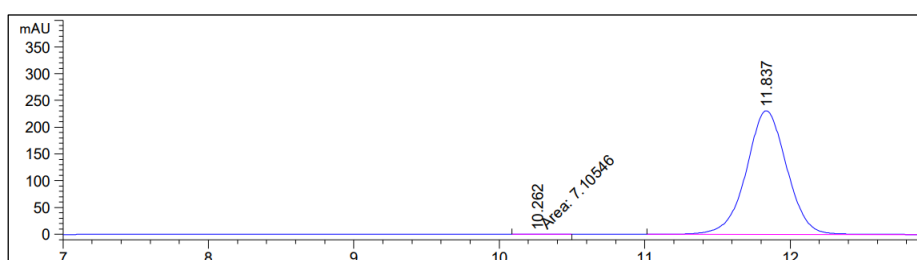

| Peak # | RetTime [min] | Type | Width [min] | Area [mAU*s] | Height [mAU] | Area %  |
|--------|---------------|------|-------------|--------------|--------------|---------|
| 1      | 10.262        | MM   | 0.2587      | 7.10546      | 4.57784e-1   | 0.1588  |
| 2      | 11.837        | BB   | 0.2956      | 4467.56201   | 231.03877    | 99.8412 |

**(R)-7-chloro-10b-(trifluoromethyl)-10b,11-dihydro-6H-isoindolo[2,1-a]indol-6-one (2l):**

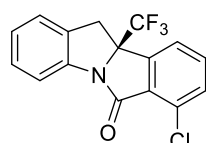

Purified by chromatography on silica gel, eluting with ethyl acetate/petroleum ether 1:50 (v/v); colorless oil (61% yield), m.p. 138-140 °C.  $[\alpha]_D^{20} = +165.5$  (c 0.5, CH<sub>2</sub>Cl<sub>2</sub>), 90% ee [Daicel Chiralpak C1 column (25 cm × 0.46 cm ID), "hexane/iPrOH = 90/10, 0.7 mL/min, 210 nm;  $t_{\text{minor}} = 9.6$  min,  $t_{\text{major}} = 10.7$  min]. <sup>1</sup>H NMR (400 MHz, CDCl<sub>3</sub>) δ

7.70 (d,  $J = 7.9$  Hz, 1H), 7.64-7.52 (m, 3H), 7.30 (t,  $J = 7.7$  Hz, 1H), 7.22 (d,  $J = 7.5$  Hz, 1H), 7.11 (td,  $J = 7.5, 1.1$  Hz, 1H), 3.73 (d,  $J = 16.5$  Hz, 1H), 3.43 (d,  $J = 16.5$  Hz, 1H).  $^{13}\text{C}$  NMR (100 MHz,  $\text{CDCl}_3$ )  $\delta$  167.2, 144.9, 140.8, 134.4, 133.1 (q,  $J = 41.0$  Hz), 132.3, 130.5, 129.3, 128.4 (d,  $J = 7.0$  Hz), 125.3 (d,  $J = 36.0$  Hz), 125.0 (q,  $J = 282.0$  Hz), 124.7, 122.1 (d,  $J = 2.0$  Hz), 116.8 (d,  $J = 24.0$  Hz), 73.1 (q,  $J = 30.0$  Hz), 34.9.  $^{19}\text{F}$  NMR (377 MHz,  $\text{CDCl}_3$ )  $\delta$  -79.8 ppm. HRMS  $m/z$  (ESI+): Calcd for  $\text{C}_{16}\text{H}_9\text{ClF}_3\text{NONa}^+$  ( $\text{M}+\text{Na}$ ) $^+$  346.0217, found 346.0218.

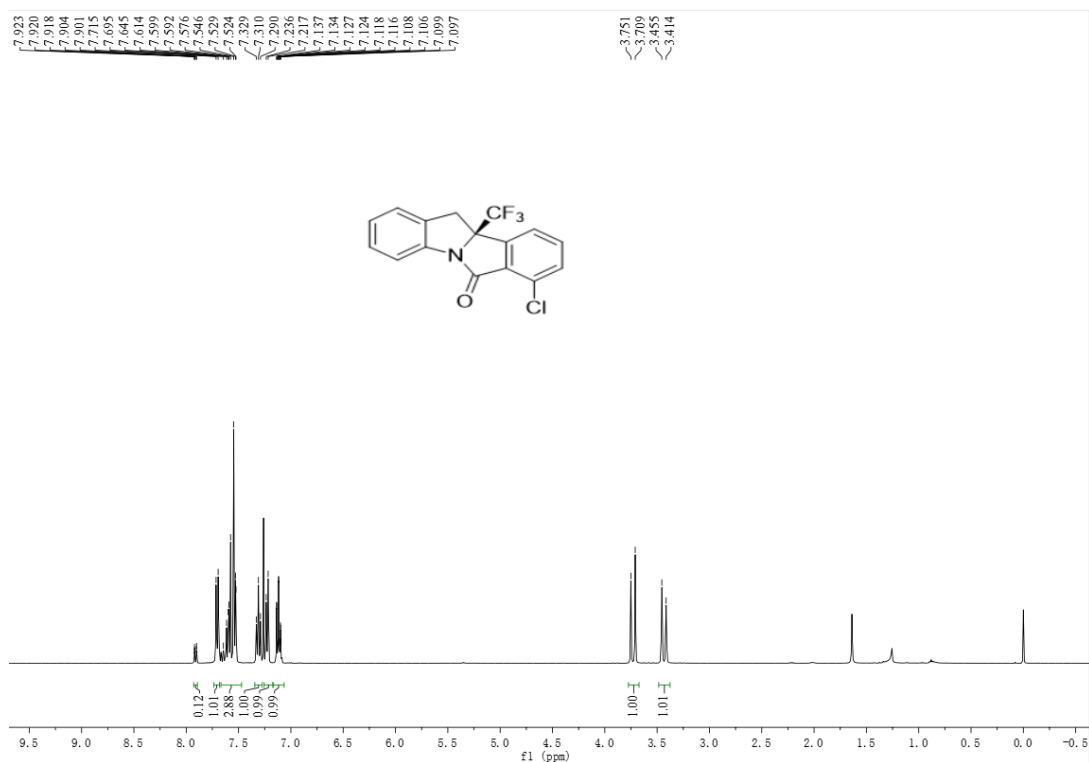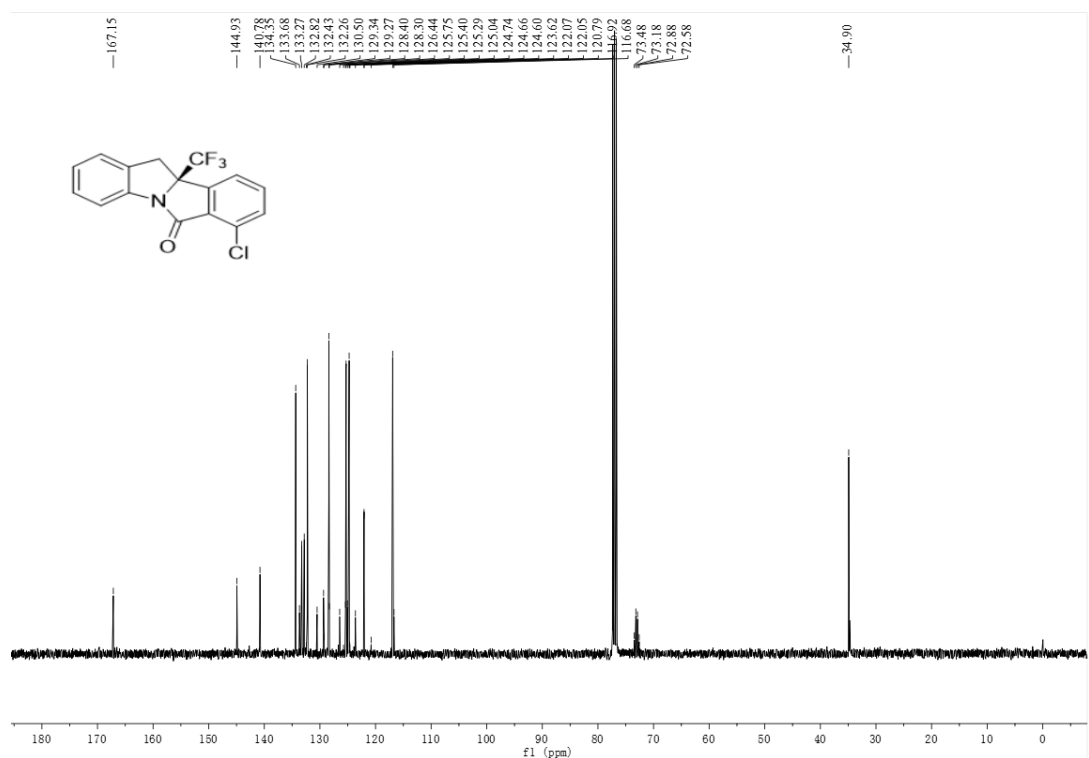

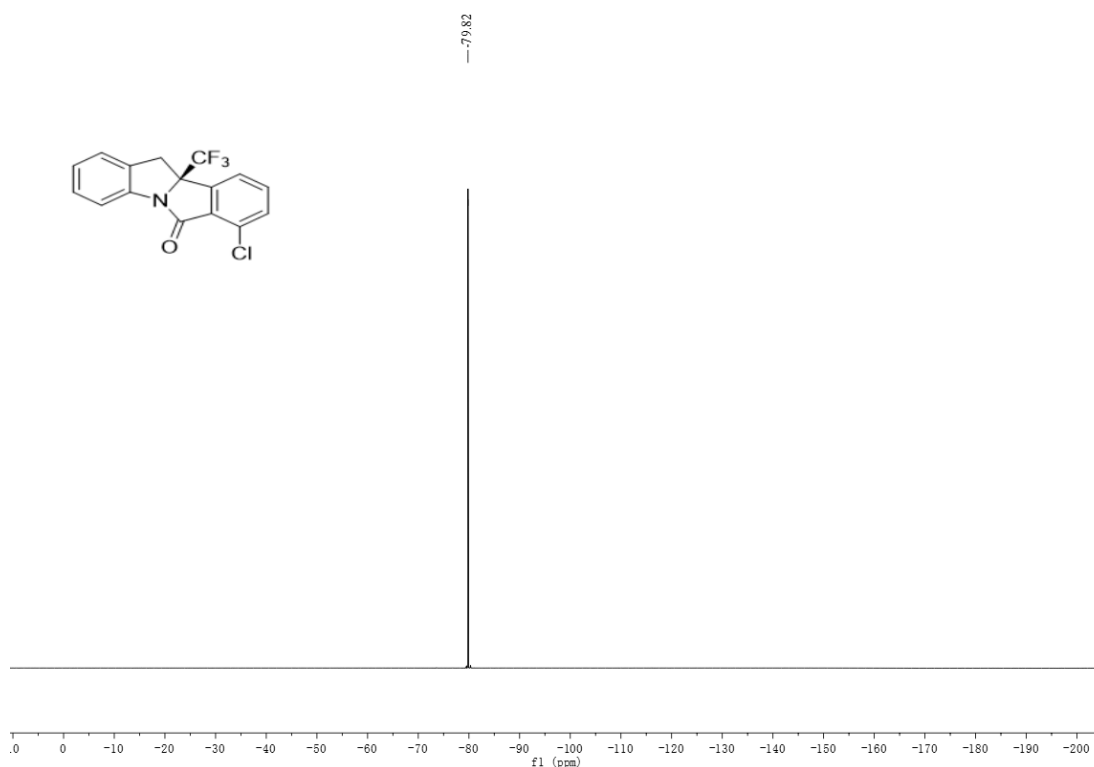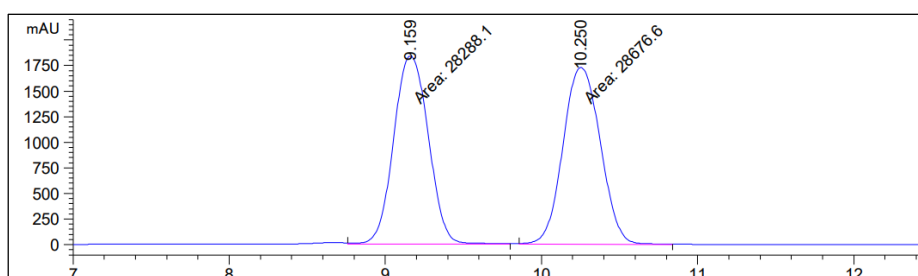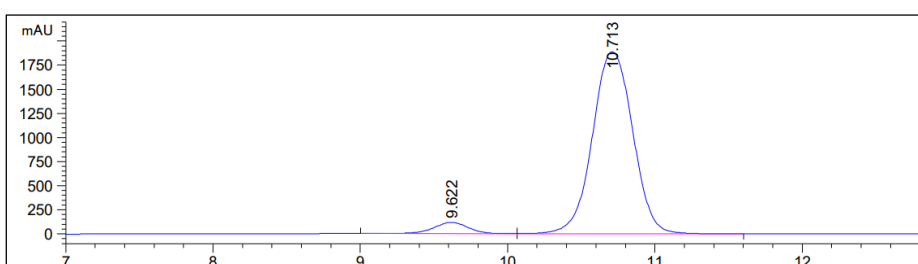

| Peak # | RetTime [min] | Type | Width [min] | Area [mAU*s] | Height [mAU] | Area %  |
|--------|---------------|------|-------------|--------------|--------------|---------|
| 1      | 9.622         | BV   | 0.2519      | 1948.92200   | 117.27740    | 5.1361  |
| 2      | 10.713        | VB   | 0.2982      | 3.59965e4    | 1889.95056   | 94.8639 |

**(R)-8,9-Dimethoxy-10b-(trifluoromethyl)-10b,11-dihydro-6H-isoindolo[2,1-a]indol-6-one (2m):**

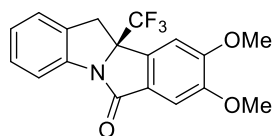

Purified by chromatography on silica gel, eluting with ethyl acetate/petroleum ether 1:50 (v/v); colorless oil (72% yield).  $[\alpha]_D^{20} = +196.0$  (c 0.5,  $\text{CH}_2\text{Cl}_2$ ), 99% ee [Daicel Chiralpak AD-H column (25 cm  $\times$  0.46 cm ID),  $^n\text{hexane}/i\text{PrOH} = 85/15$ , 0.6

mL/min, 254 nm;  $t_{\text{minor}} = 11.6$  min,  $t_{\text{major}} = 12.7$  min].  $^1\text{H}$  NMR (400 MHz,  $\text{CDCl}_3$ )  $\delta$  7.67 (d,  $J = 7.8$  Hz, 1H), 7.33-7.28 (m, 2H), 7.22 (d,  $J = 7.8$  Hz, 1H), 7.10 (t,  $J = 7.5$  Hz, 1H), 7.03 (s, 1H), 4.01 (s, 3H), 3.96 (s, 3H), 3.68 (d,  $J = 16.5$  Hz, 1H), 3.43 (d,  $J = 16.4$  Hz, 1H).  $^{13}\text{C}$  NMR (100 MHz,  $\text{CDCl}_3$ )  $\delta$  170.4, 154.2, 151.3, 141.1, 136.7, 133.1, 128.3, 125.3 (q,  $J = 282.0$  Hz), 125.4, 124.9, 124.8, 116.6, 106.3, 105.2, 73.8 (q,  $J = 30.0$  Hz), 56.5, 56.4, 34.7.  $^{19}\text{F}$  NMR (377 MHz,  $\text{CDCl}_3$ )  $\delta$  -79.9 ppm. HRMS  $m/z$  (ESI+): Calcd for  $\text{C}_{18}\text{H}_{14}\text{F}_3\text{NO}_3\text{Na}^+$  ( $\text{M}+\text{Na}$ ) $^+$  372.0818, found 372.0817.

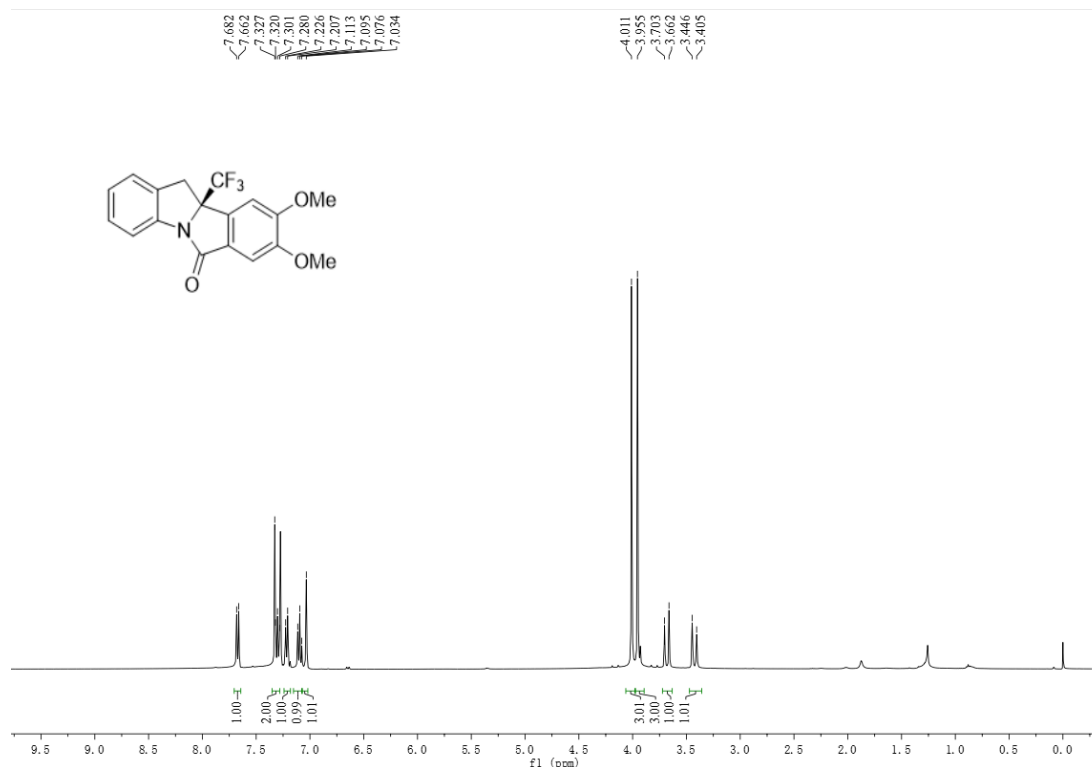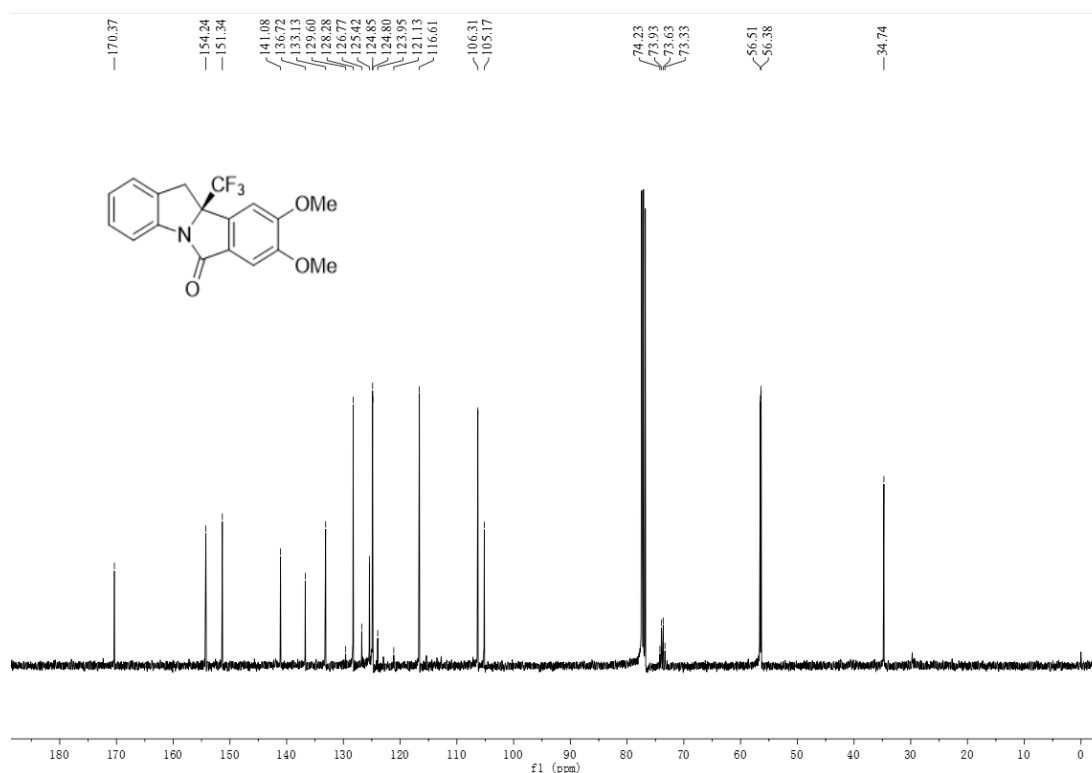



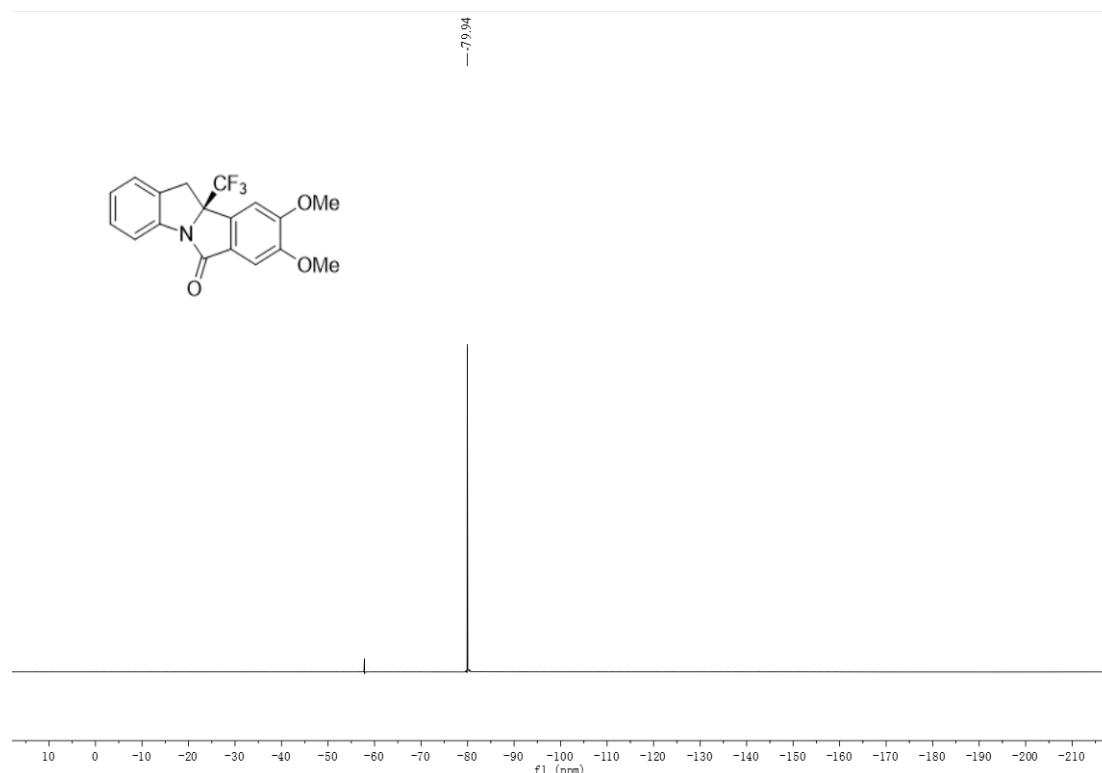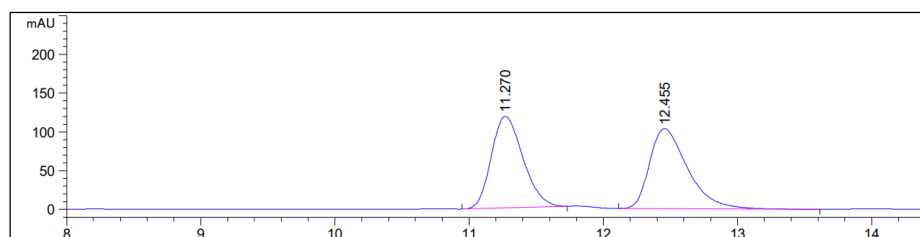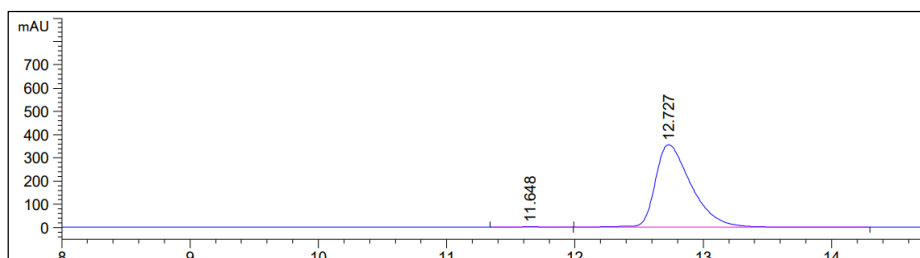

| Peak # | RetTime [min] | Type | Width [min] | Area [mAU*s] | Height [mAU] | Area %  |
|--------|---------------|------|-------------|--------------|--------------|---------|
| 1      | 11.648        | BB   | 0.2346      | 47.75061     | 3.19108      | 0.4148  |
| 2      | 12.727        | BB   | 0.2956      | 1.14646e4    | 587.54749    | 99.5852 |

**(R)-8,9-Difluoro-10b-(trifluoromethyl)-10b,11-dihydro-6H-isoindolo[2,1-a]indol-6-one (2n):**

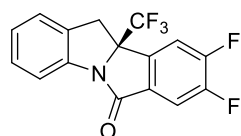

Purified by chromatography on silica gel, eluting with ethyl acetate/petroleum ether 1:50 (v/v); white solid (50% yield), m.p. 135-137 °C.  $[\alpha]_D^{20} = +107.4$  (c 0.5, CH<sub>2</sub>Cl<sub>2</sub>), 99% ee [Daicel Chiralpak AD-H column (25 cm × 0.46 cm ID), "hexane/iPrOH = 80/20, 0.6 mL/min, 280 nm;  $t_{\text{major}} = 8.6$  min,  $t_{\text{minor}} = 10.9$  min]. <sup>1</sup>H NMR (400 MHz, CDCl<sub>3</sub>) δ 7.71 (t,  $J = 7.9$  Hz, 1H), 7.67 (d,  $J = 7.9$  Hz, 1H), 7.47 (t,  $J = 7.9$  Hz, 1H),

7.33 (t,  $J = 7.7$  Hz, 1H), 7.25 (d,  $J = 7.6$  Hz, 2H), 7.14 (t,  $J = 7.5$  Hz, 1H), 3.71 (d,  $J = 16.5$  Hz, 1H), 3.44 (d,  $J = 16.5$  Hz, 1H).  $^{13}\text{C}$  NMR (100 MHz,  $\text{CDCl}_3$ )  $\delta$  167.8 (d,  $J = 3.0$  Hz), 154.6 (dd,  $J = 179.0, 14.0$  Hz), 152.0 (dd,  $J = 175.0, 14.0$  Hz), 140.4, 138.9 (d,  $J = 8.0$  Hz), 132.8, 130.1 (dd,  $J = 7.0, 6.0$  Hz), 128.6, 125.5, 125.0, 120.6 (q,  $J = 283.0$  Hz), 116.7, 114.4 (dd,  $J = 19.3, 1.9$  Hz) 113.2 (d,  $J = 20.0$  Hz), 74.0 (q,  $J = 30.0$  Hz), 34.6.  $^{19}\text{F}$  NMR (377 MHz,  $\text{CDCl}_3$ )  $\delta$  -79.9, -125.7, -131.6 ppm. HRMS  $m/z$  (ESI+): Calcd for  $\text{C}_{16}\text{H}_9\text{F}_5\text{NO}^+$  ( $M+H$ ) $^+$  326.0599, found 326.0600.

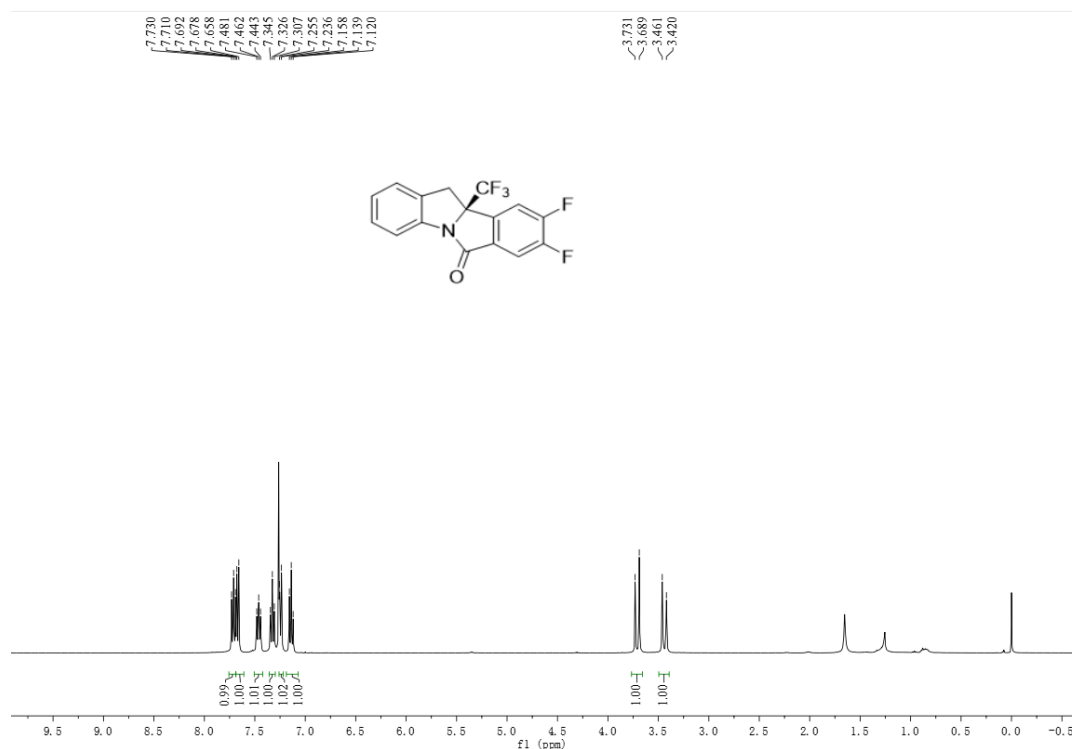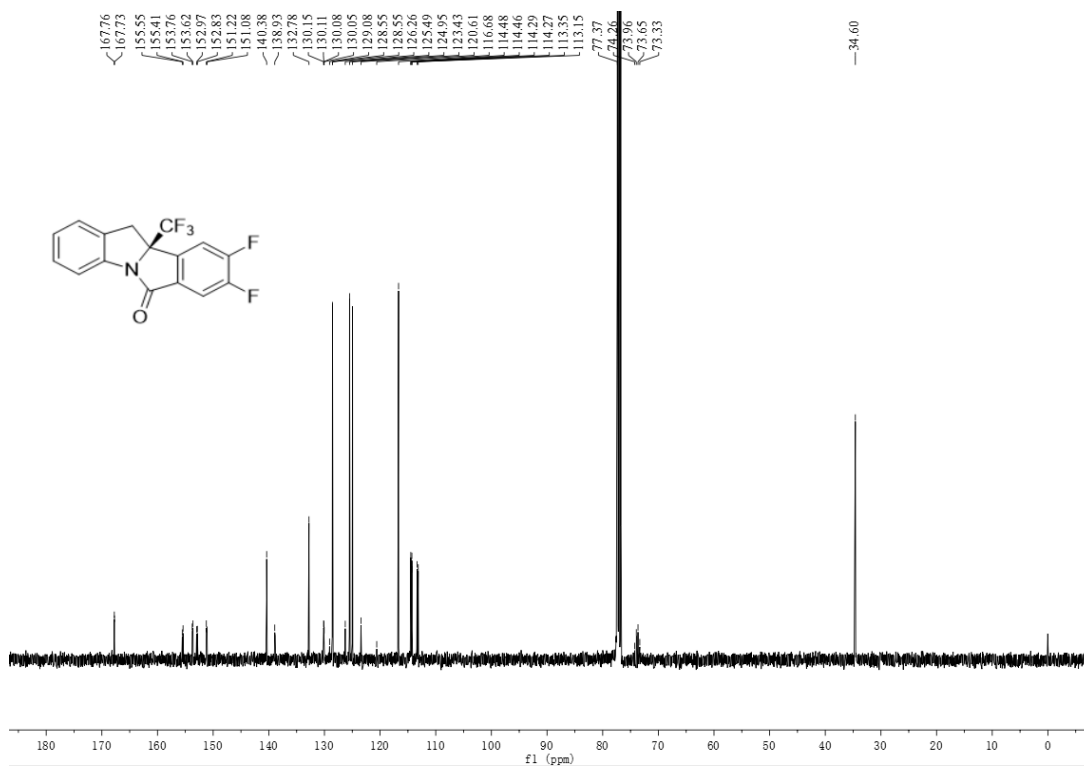

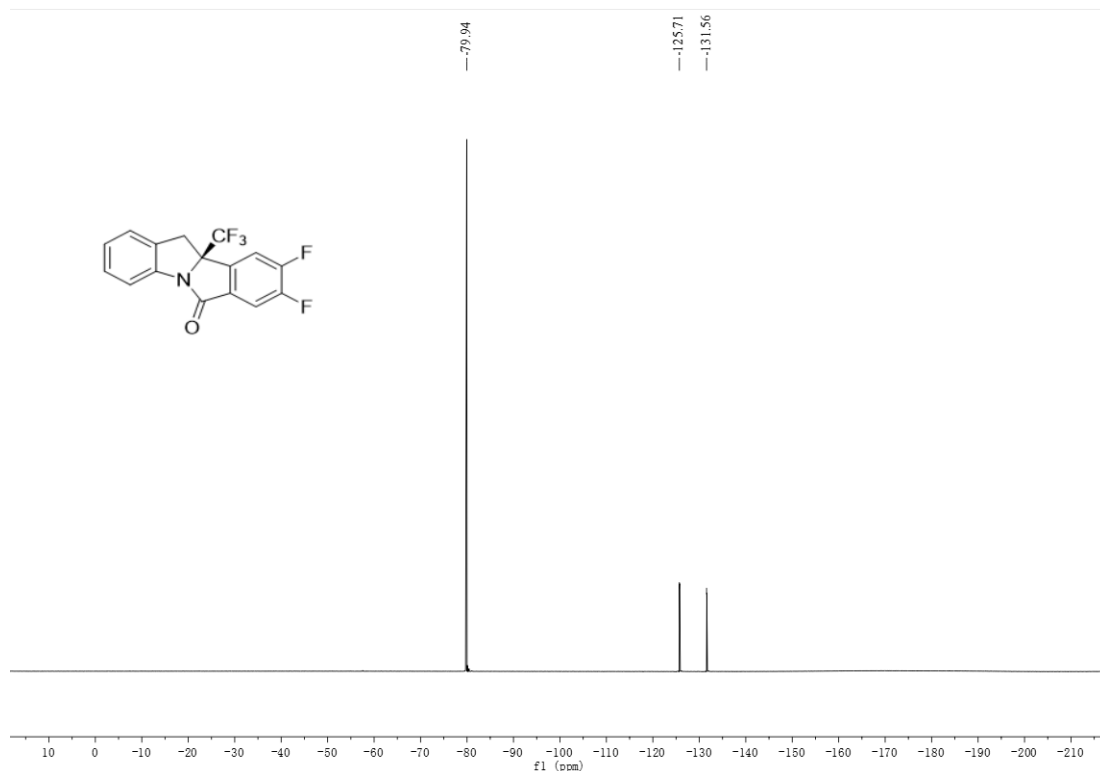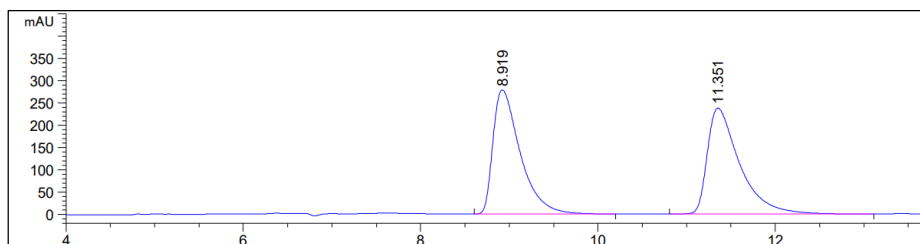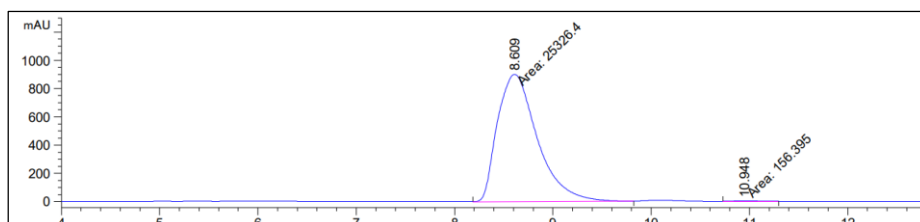

| Peak # | RetTime [min] | Type | Width [min] | Area [mAU*s] | Height [mAU] | Area %  |
|--------|---------------|------|-------------|--------------|--------------|---------|
| 1      | 8.609         | MM   | 0.4716      | 2.55272e4    | 902.10590    | 99.7862 |
| 2      | 10.948        | MM   | 0.2672      | 54.70612     | 3.41213      | 0.2138  |

***(R)*-13a-(Trifluoromethyl)-13,13a-dihydro-7H-benzo[6,7]isoindolo[2,1-a]indol-7-one (20):**

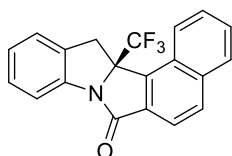

Purified by chromatography on silica gel, eluting with ethyl acetate/petroleum ether 1:50 (v/v); colorless liquid (23% yield),  $[\alpha]_D^{20} = +149.0$  (c 0.5,  $\text{CH}_2\text{Cl}_2$ ), 89% ee [Daicel Chiralpak AD-H column (25 cm  $\times$  0.46 cm ID),  $n$ -hexane/ $i$ -PrOH = 80/20, 0.6 mL/min, 280 nm;  $t_{\text{major}} = 32.8$  min,  $t_{\text{minor}} = 54.3$  min].  $^1\text{H}$  NMR (600 MHz,  $\text{CDCl}_3$ )  $\delta$  8.06 (t,  $J = 8.6$  Hz, 2H), 8.02 (dd,  $J = 8.0, 1.5$  Hz, 1H), 7.91 (d,  $J = 8.3$  Hz,

1H), 7.76 (d,  $J = 7.9$  Hz, 1H), 7.72-7.67 (m, 2H), 7.33 (t,  $J = 7.7$  Hz, 1H), 7.27 (d,  $J = 7.5$  Hz, 1H), 7.11 (t,  $J = 7.5$  Hz, 1H), 4.02 (d,  $J = 16.3$  Hz, 1H), 3.72 (d,  $J = 16.3$  Hz, 1H).  $^{13}\text{C}$  NMR (151 MHz,  $\text{CDCl}_3$ )  $\delta$  169.7, 141.6, 140.4, 136.4, 132.4, 132.3, 132.0, 129.5, 128.6, 128.4, 128.1, 127.5, 125.4 (q,  $J = 282.0$  Hz), 124.92, 124.89, 124.87, 120.5, 116.0, 75.1 (q,  $J = 30.0$  Hz), 34.2.  $^{19}\text{F}$  NMR (377 MHz,  $\text{CDCl}_3$ )  $\delta$  -78.1 ppm. HRMS  $m/z$  (ESI+): Calcd for  $\text{C}_{20}\text{H}_{12}\text{F}_3\text{NONa}^+$  ( $\text{M}+\text{Na}$ ) $^+$  362.0763, found 362.0760.

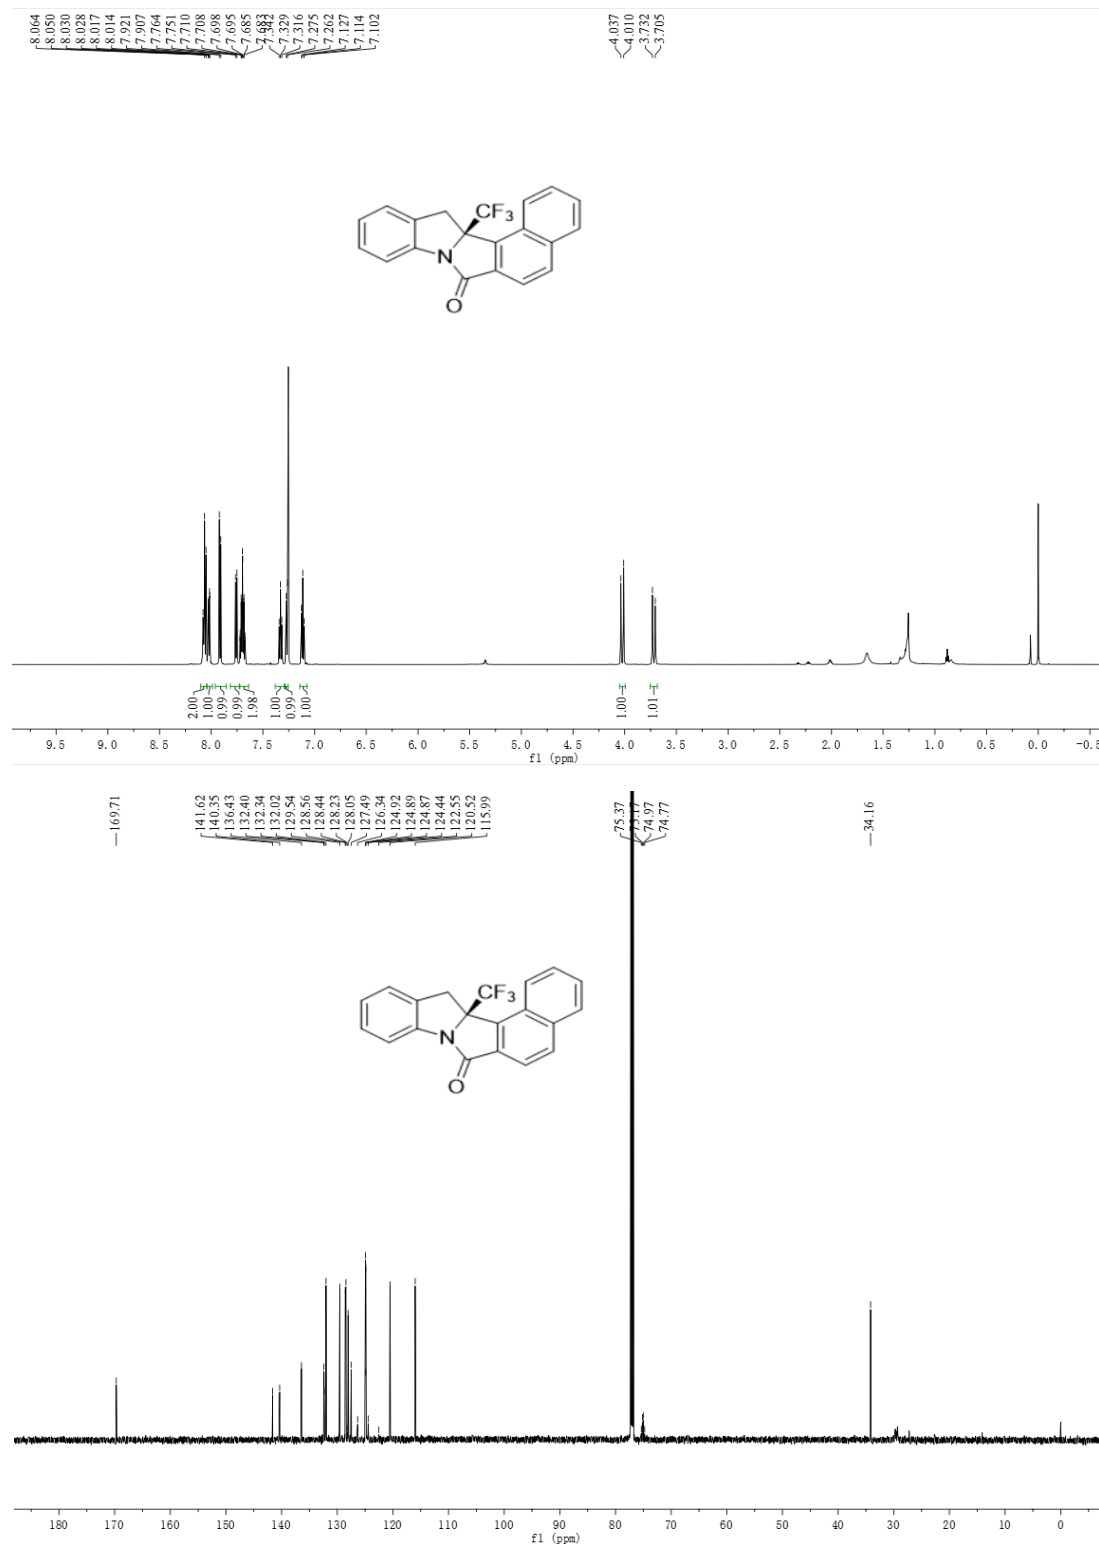

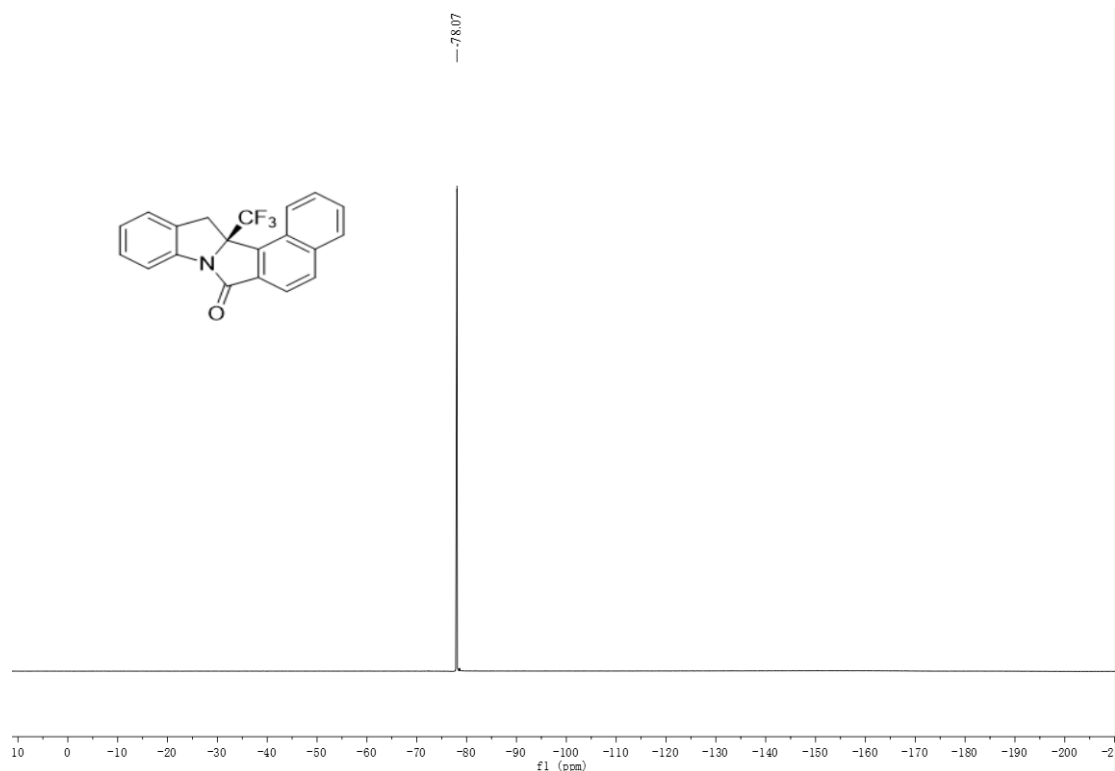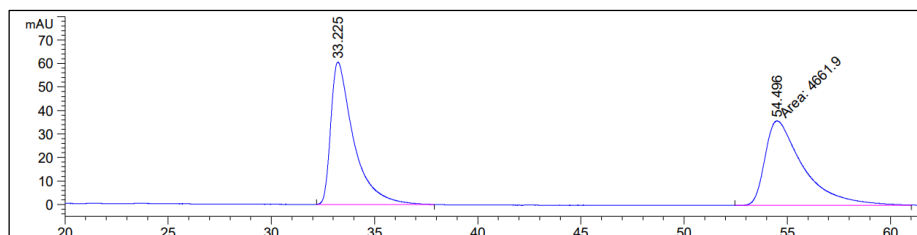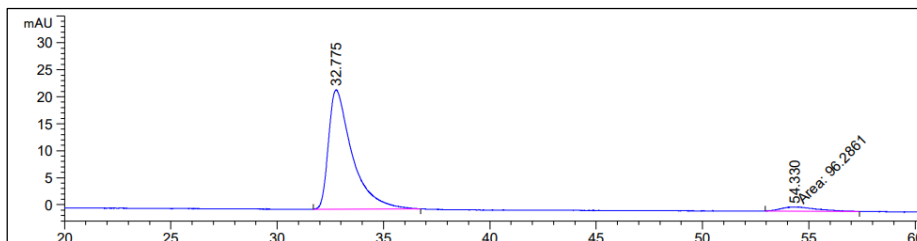

| Peak # | RetTime [min] | Type | Width [min] | Area [mAU*s] | Height [mAU] | Area %  |
|--------|---------------|------|-------------|--------------|--------------|---------|
| 1      | 32.775        | BB   | 1.0263      | 1704.50061   | 22.08725     | 94.6531 |
| 2      | 54.330        | MM   | 2.0453      | 96.28606     | 7.84603e-1   | 5.3469  |

**(R)-3-Methoxy-10b-(difluoromethyl)-10b,11-dihydro-6H-isoindolo[2,1-a]indol-6-one (2p):**

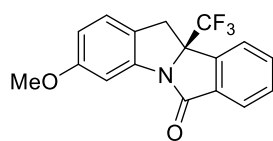

Purified by chromatography on silica gel, eluting with ethyl acetate/petroleum ether 1:50 (v/v); white solid (62% yield), m.p. 140-142 °C.  $[\alpha]_D^{20} = +300.0$  (c 0.5, CH<sub>2</sub>Cl<sub>2</sub>), 98% ee [Daicel Chiralpak AD-H column (25 cm × 0.46 cm ID), *n*-hexane/*i*-PrOH = 90/10, 0.6 mL/min, 210 nm;  $t_{\text{minor}} = 15.9$  min,  $t_{\text{major}} = 23.2$  min]. <sup>1</sup>H NMR (600 MHz,

CDCl<sub>3</sub>)  $\delta$  7.91 (s, 1H), 7.63-7.60 (m, 3H), 7.30 (s, 1H), 7.11 (q,  $J = 4.1, 3.4$  Hz, 1H), 6.65 (d,  $J = 7.2$ , 1H), 3.85 (s, 3H), 3.65 (d,  $J = 15.8$  Hz, 1H), 3.37 (d,  $J = 15.8$  Hz, 1H). <sup>13</sup>C NMR (150 MHz, CDCl<sub>3</sub>)  $\delta$  169.6, 160.1, 142.8, 141.9, 133.7, 133.4, 130.5, 125.4, 125.3 (q,  $J = 282.0$  Hz), 125.0, 124.7, 123.6, 111.0, 102.8, 75.0 (q,  $J = 30.0$  Hz), 55.7, 34.0. <sup>19</sup>F NMR (377 MHz, CDCl<sub>3</sub>)  $\delta$  -79.9 ppm. HRMS  $m/z$  (ESI<sup>+</sup>): Calcd for C<sub>17</sub>H<sub>12</sub>F<sub>3</sub>NONa<sup>+</sup> (M+Na)<sup>+</sup> 342.0712, found 342.0711.

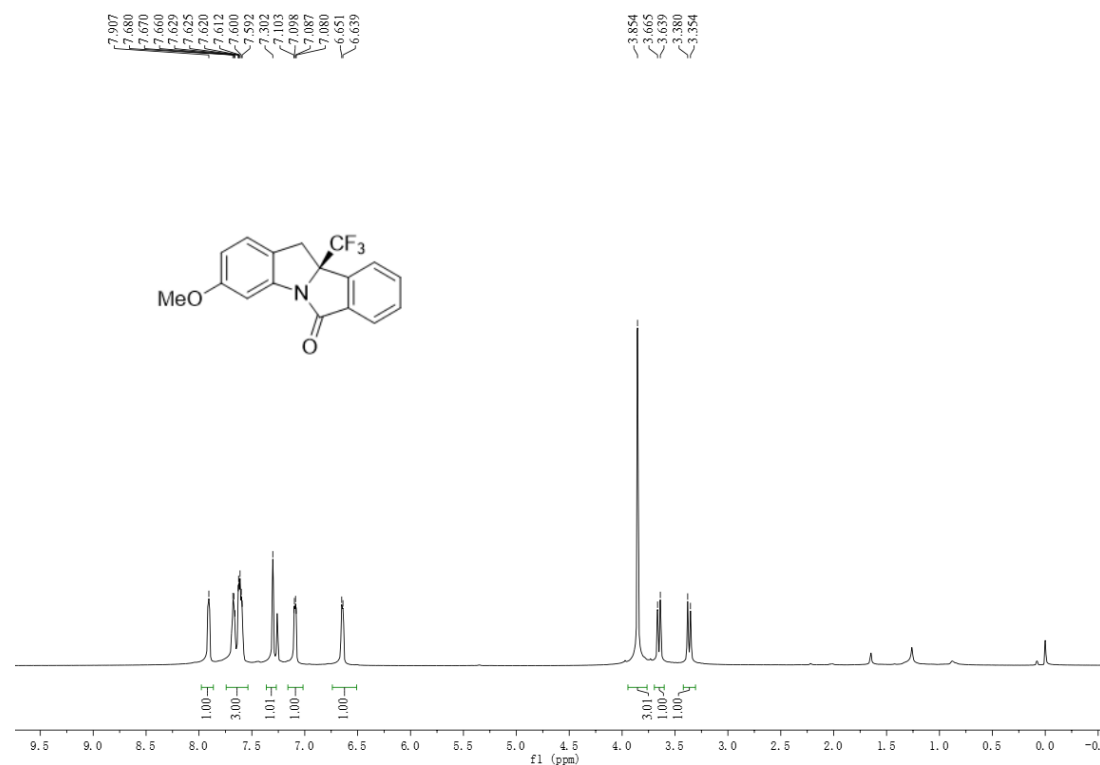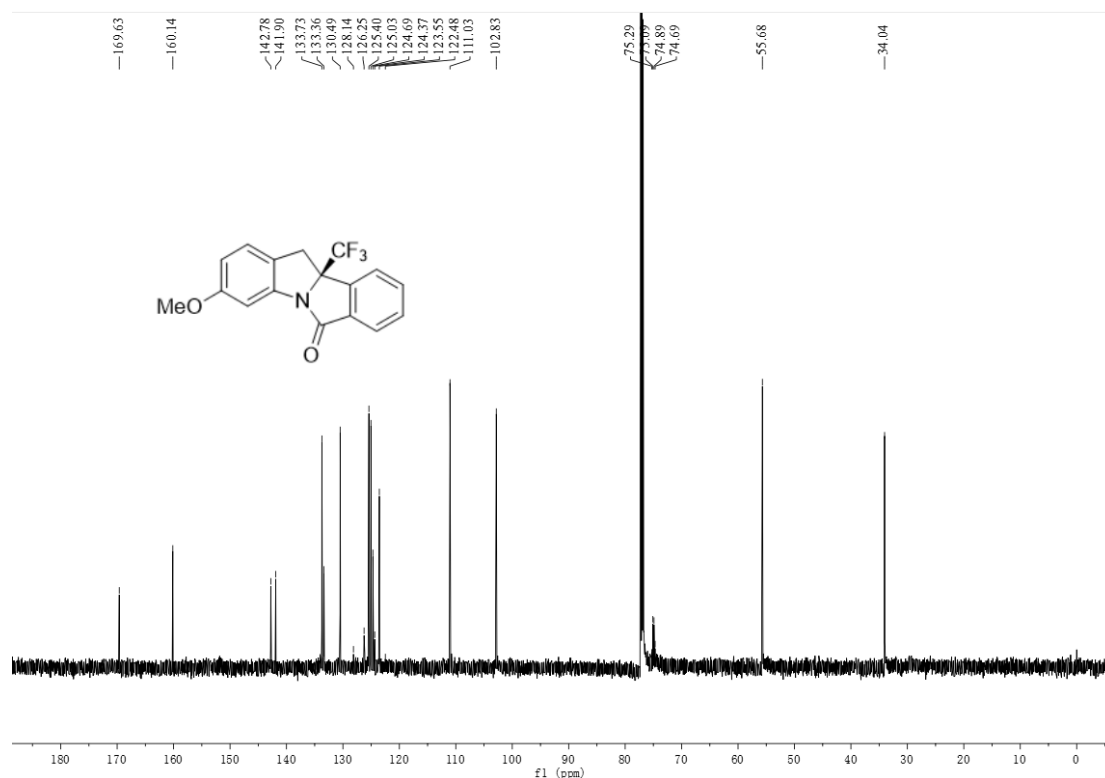

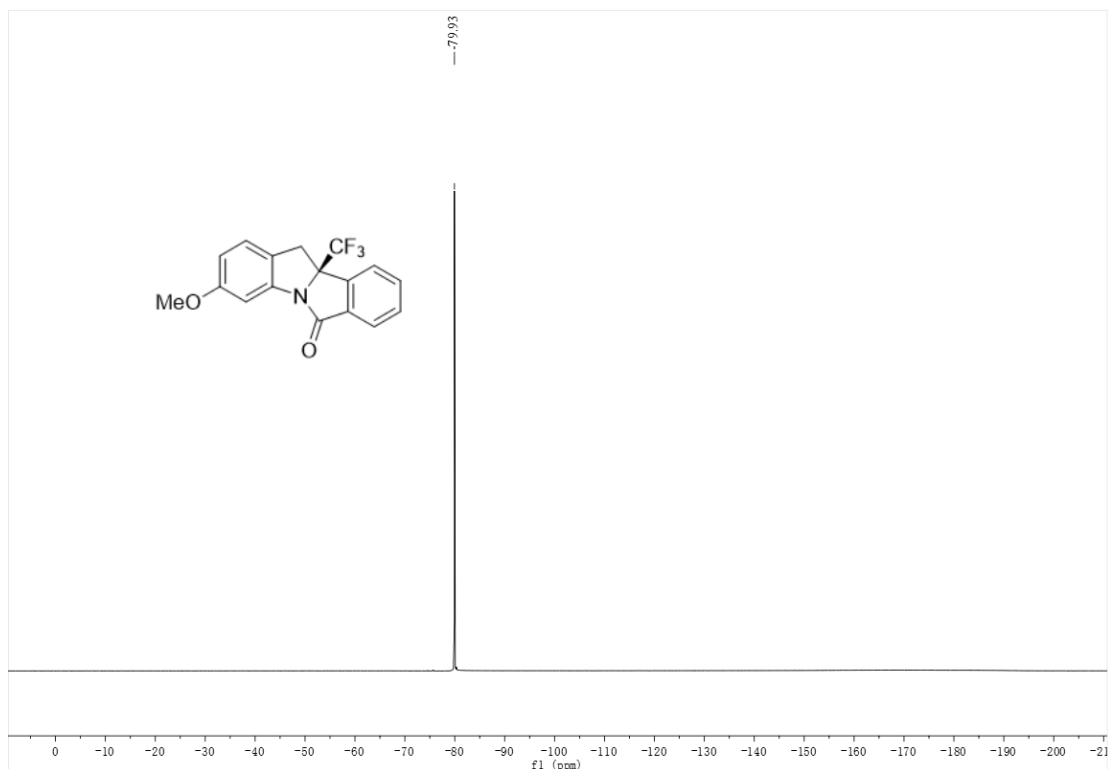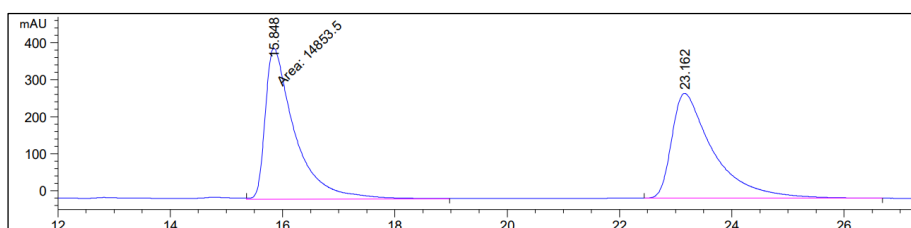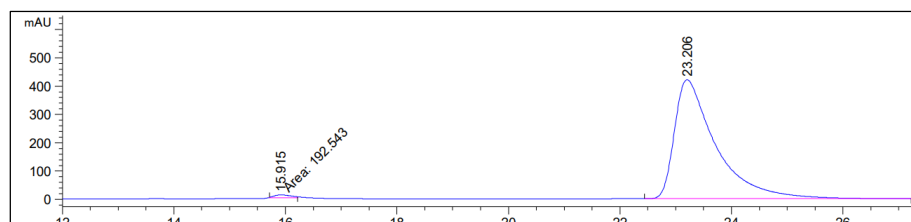

| Peak # | RetTime [min] | Type | Width [min] | Area [mAU*s] | Height [mAU] | Area %  |
|--------|---------------|------|-------------|--------------|--------------|---------|
| 1      | 15.923        | MM   | 0.3551      | 44.71601     | 2.09854      | 1.0629  |
| 2      | 23.206        | BB   | 0.7292      | 4162.41504   | 82.14651     | 98.9371 |

**(R)-3-fluoro-10b-(difluoromethyl)-10b,11-dihydro-6H-isoindolo[2,1-a]indol-6-one (2q):**

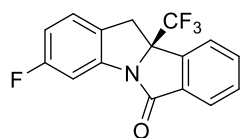

Purified by chromatography on silica gel, eluting with ethyl acetate/petroleum ether 1:50 (v/v); white solid (47% yield), m.p. 83-85 °C.  $[\alpha]_D^{20} = +175.9$  (c 0.5, CH<sub>2</sub>Cl<sub>2</sub>), 99% ee [Daicel Chiralpak OJ column (25 cm × 0.46 cm ID), "hexane/PrOH = 80/20, 0.6 mL/min, 280 nm;  $t_{\text{major}} = 9.5$  min,  $t_{\text{minor}} = 10.9$  min]. <sup>1</sup>H NMR (600 MHz, CDCl<sub>3</sub>) δ 7.92 (d,  $J = 7.6$  Hz, 1H), 7.70 (t,  $J = 7.5$  Hz, 1H), 7.64-7.61 (m, 2H), 7.43 (dd,

$J = 8.7, 2.5$  Hz, 1H), 7.17-7.14 (m, 1H), 6.82-6.78 (m, 1H), 3.69 (d,  $J = 16.3$  Hz, 1H), 3.39 (d,  $J = 16.3$  Hz, 1H).  $^{13}\text{C}$  NMR (150 MHz,  $\text{CDCl}_3$ )  $\delta$  169.5, 162.8 (d,  $J = 244.5$  Hz), 142.6, 142.0 (d,  $J = 12.0$  Hz), 134.0, 133.0, 130.7, 128.5 (d,  $J = 3.0$  Hz), 125.6, 125.3 (d,  $J = 10.5$  Hz), 125.2 (q,  $J = 282.0$  Hz), 123.6, 111.6 (d,  $J = 7.5$  Hz), 105.1 (d,  $J = 27.0$  Hz), 75.0 (d,  $J = 30.0$  Hz), 34.1.  $^{19}\text{F}$  NMR (377 MHz,  $\text{CDCl}_3$ )  $\delta$  -80.0, -112.9 ppm. HRMS  $m/z$  (ESI $^+$ ): Calcd for  $\text{C}_{16}\text{H}_9\text{F}_4\text{NONa}^+$  ( $\text{M}+\text{Na}$ ) $^+$  330.0513, found 330.0514.

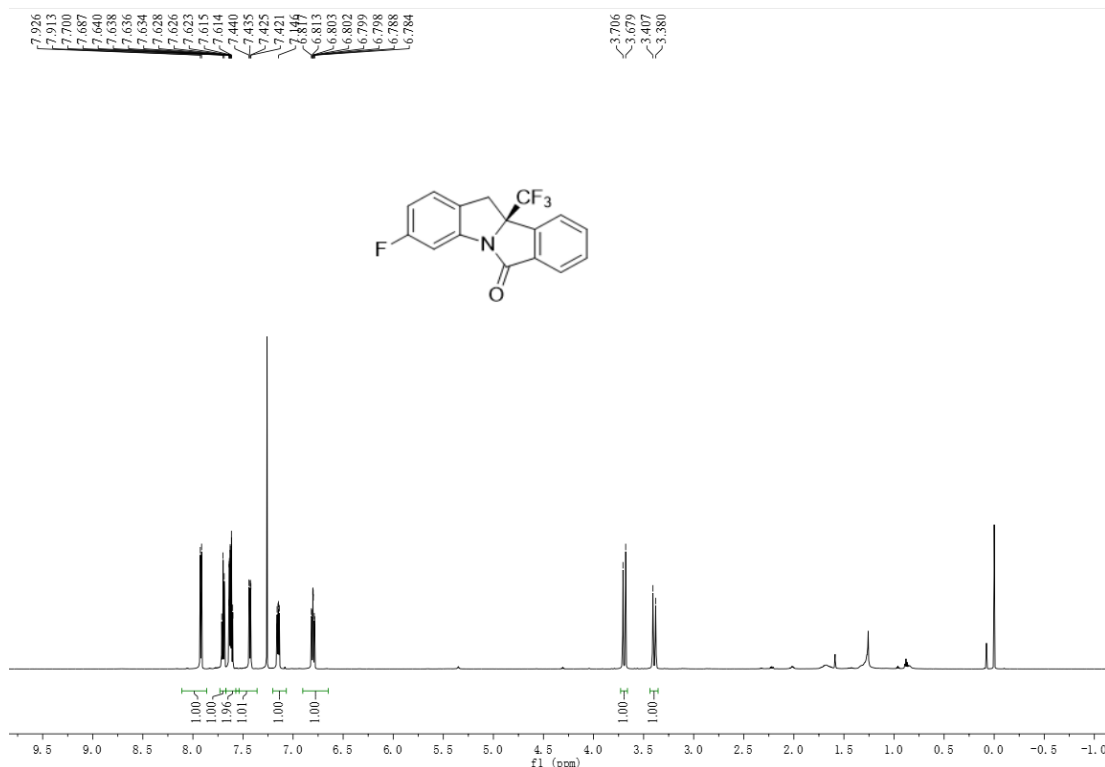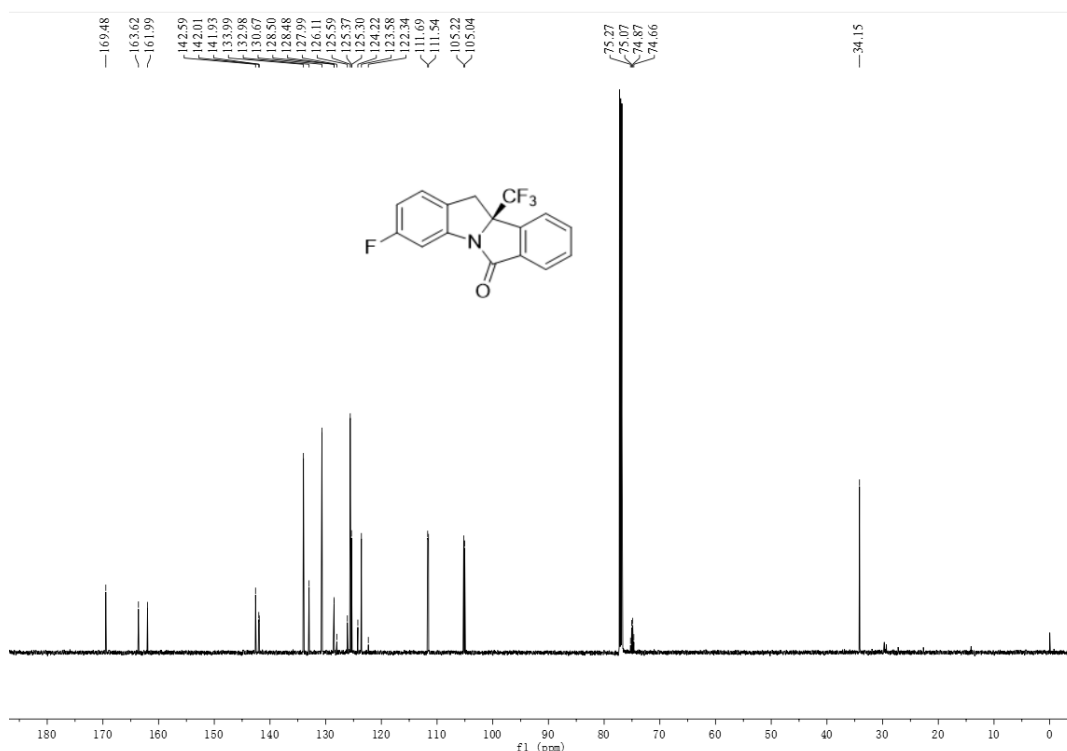



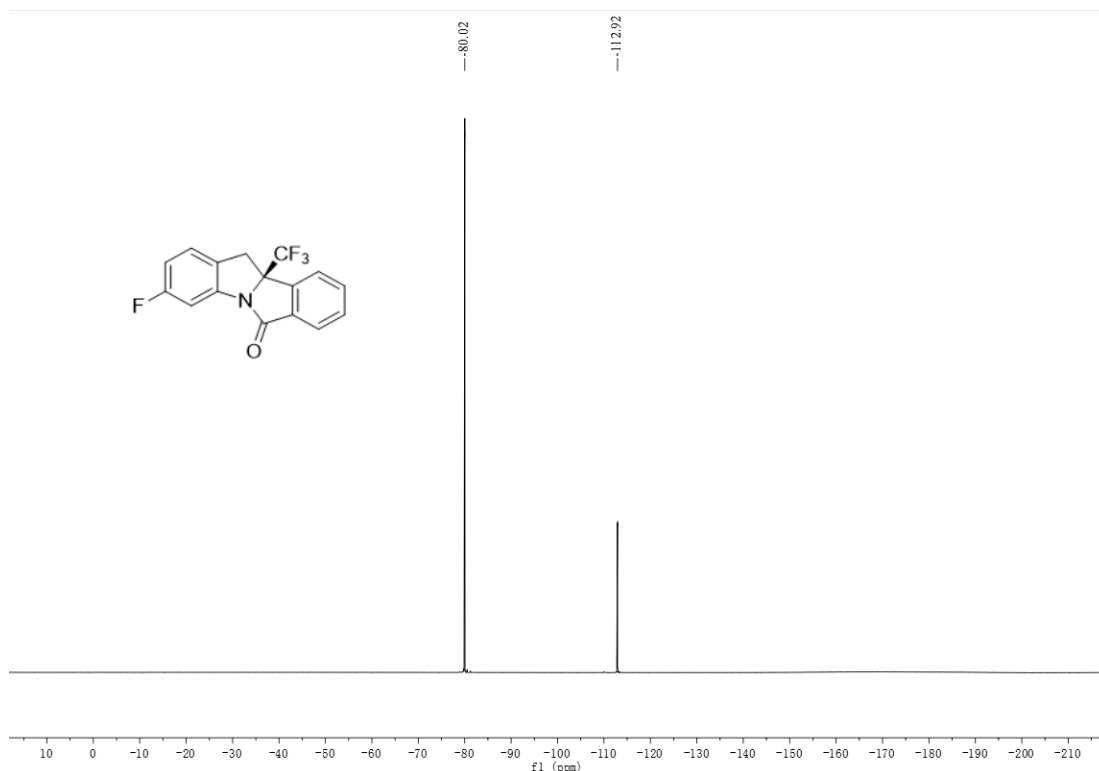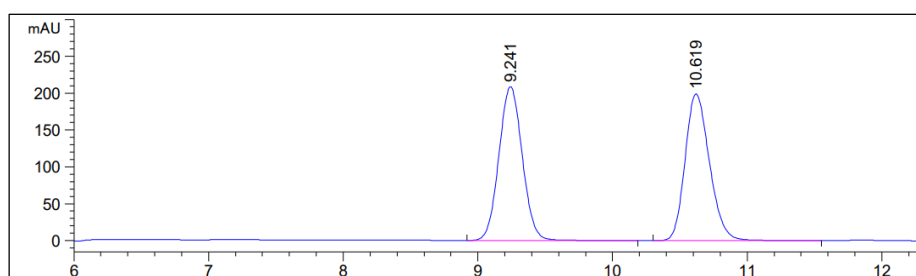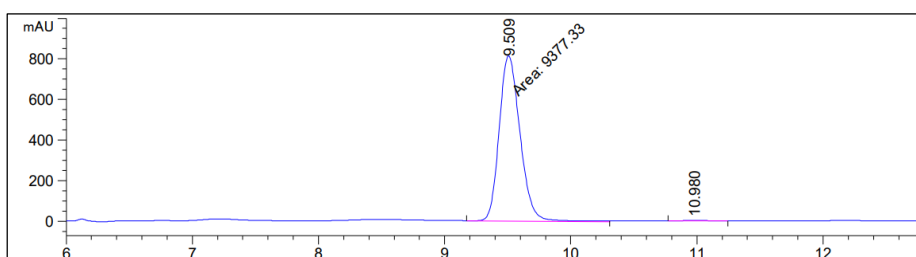

| Peak # | RetTime [min] | Type | Width [min] | Area [mAU*s] | Height [mAU] | Area %  |
|--------|---------------|------|-------------|--------------|--------------|---------|
| 1      | 9.509         | MM   | 0.1917      | 9377.62402   | 815.35437    | 99.6795 |
| 2      | 10.980        | BB   | 0.1859      | 30.15655     | 2.51559      | 0.3205  |

**(R)-3-chloro-10b-(difluoromethyl)-10b,11-dihydro-6H-isoindolo[2,1-a]indol-6-one (2r):**

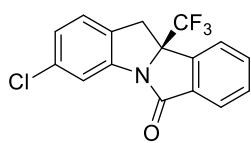

Purified by chromatography on silica gel, eluting with ethyl acetate/petroleum ether 1:50 (v/v); white solid (57% yield), m.p. 175-177 °C.  $[\alpha]_D^{20} = +154.3$  (c 0.5, CH<sub>2</sub>Cl<sub>2</sub>), 97% ee [Daicel Chiralpak OJ column (25 cm × 0.46 cm ID), *n*-hexane/*i*PrOH = 80/20, 0.6 mL/min, 280 nm;  $t_{\text{major}} = 9.6$  min,  $t_{\text{minor}} = 11.2$  min]. <sup>1</sup>H NMR (600 MHz,

CDCl<sub>3</sub>)  $\delta$  7.92 (d,  $J$  = 7.5 Hz, 1H), 7.72 (d,  $J$  = 7.7 Hz, 2H), 7.61 (dd,  $J$  = 13.0, 7.0 Hz, 2H), 7.14 (d,  $J$  = 7.9 Hz, 1H), 7.08 (d,  $J$  = 8.0 Hz, 1H), 3.70 (d,  $J$  = 16.6 Hz, 1H), 3.39 (d,  $J$  = 16.6 Hz, 1H). <sup>13</sup>C NMR (150 MHz, CDCl<sub>3</sub>)  $\delta$  169.4, 142.5, 141.8, 134.0 (d,  $J$  = 30.0 Hz), 132.9, 131.7, 130.7, 129.9 (d,  $J$  = 4.5 Hz), 125.6, 125.5, 125.11, 125.09 (q,  $J$  = 282.0 Hz), 123.6, 117.2, 74.6 (q,  $J$  = 30.0 Hz), 34.34. <sup>19</sup>F NMR (377 MHz, CDCl<sub>3</sub>)  $\delta$  -80.0 ppm. HRMS  $m/z$  (ESI<sup>+</sup>): Calcd for C<sub>16</sub>H<sub>9</sub>ClF<sub>3</sub>NONa<sup>+</sup> (M+Na)<sup>+</sup> 346.0217, found 346.0219.

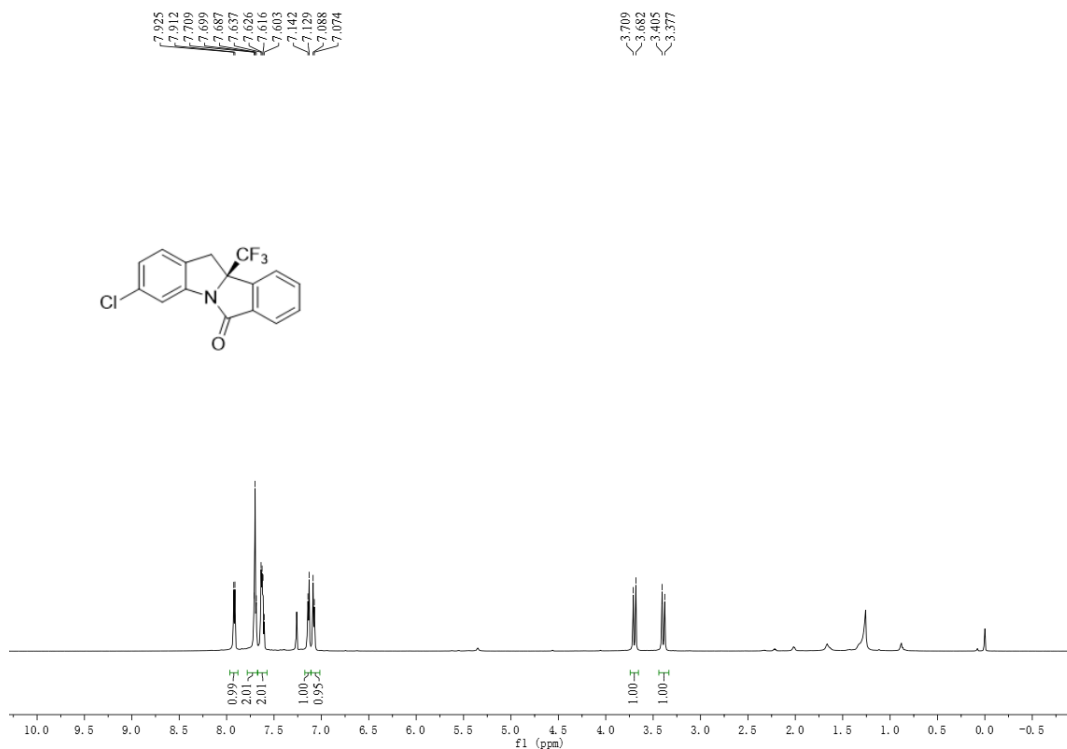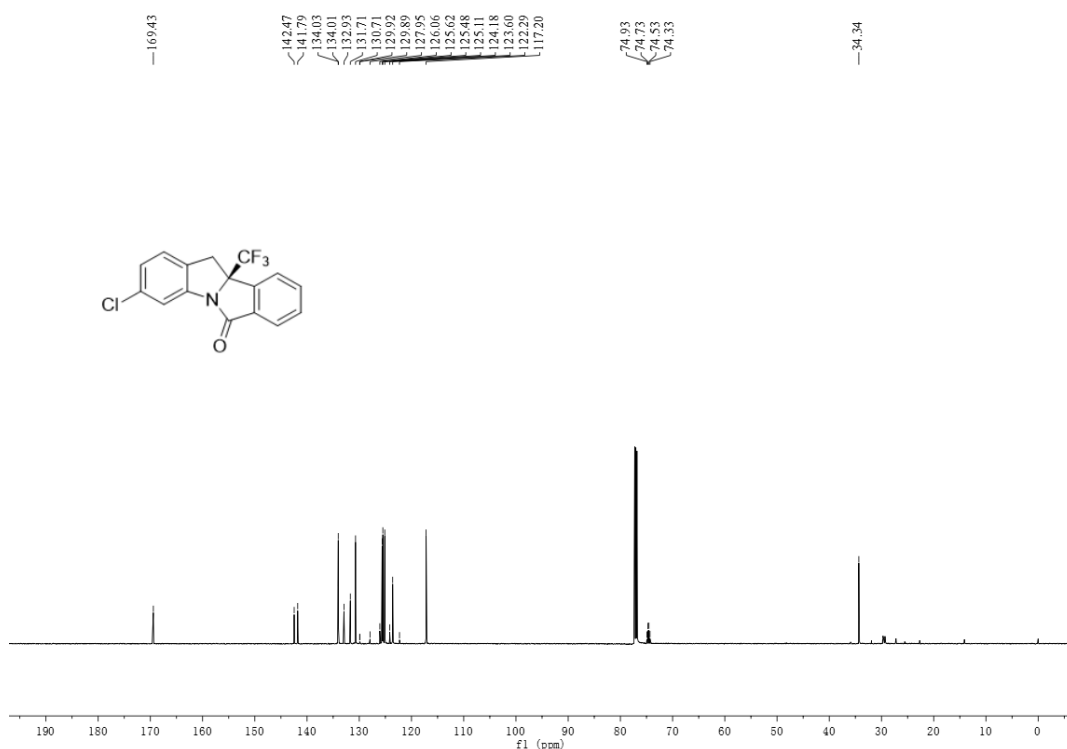

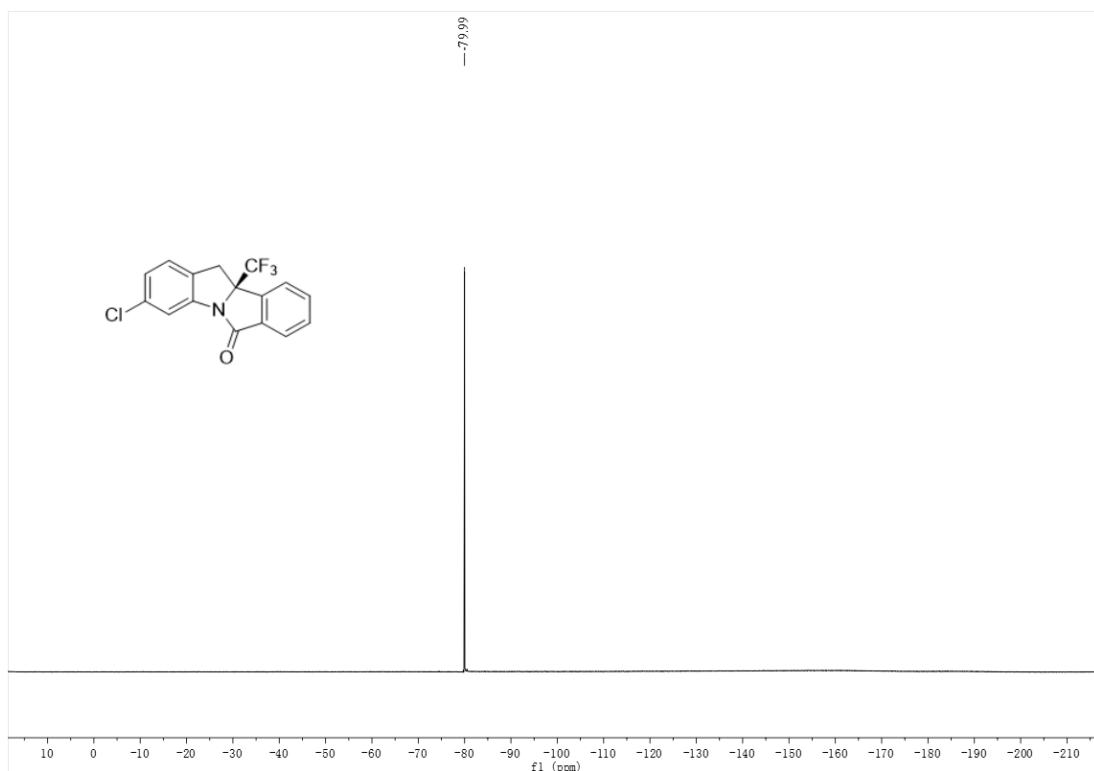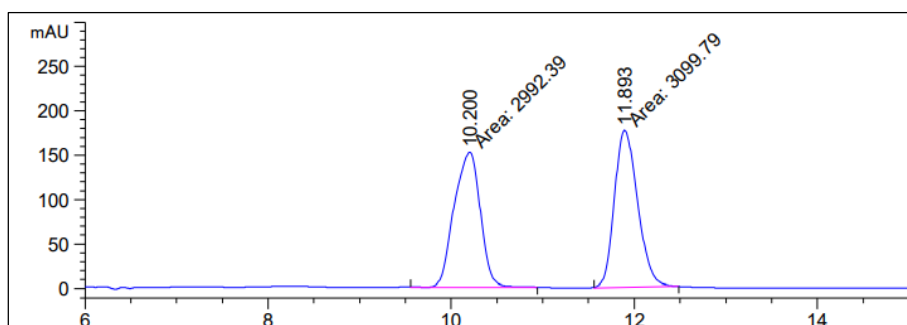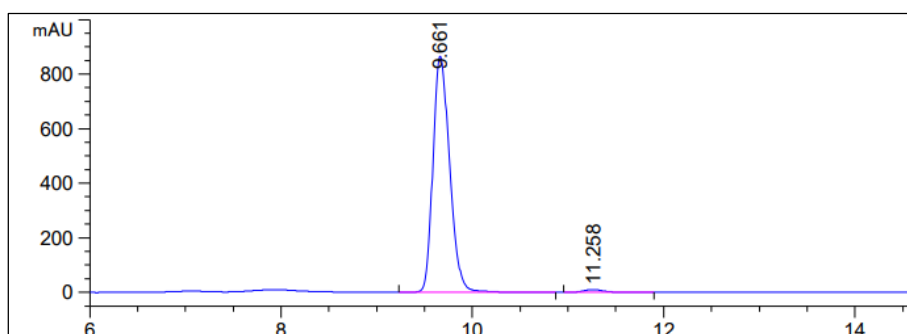

| Peak # | RetTime [min] | Type | Width [min] | Area [mAU*s] | Height [mAU] | Area %  |
|--------|---------------|------|-------------|--------------|--------------|---------|
| 1      | 9.661         | BB   | 0.1875      | 1.05030e4    | 865.95343    | 98.6964 |
| 2      | 11.258        | BB   | 0.2175      | 138.72108    | 9.89683      | 1.3036  |

**(R)-2-Methoxy-10b-(difluoromethyl)-10b,11-dihydro-6H-isoindolo[2,1-a]indol-6-one (2s):**

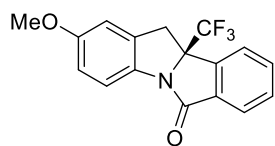

Purified by chromatography on silica gel, eluting with ethyl acetate/petroleum ether 1:50 (v/v); colorless oil (53% yield).  $[\alpha]_D^{20} = +94.4$  (c 0.5,  $\text{CH}_2\text{Cl}_2$ ), 99% ee [Daicel Chiralpak AD-H column (25 cm  $\times$  0.46 cm ID),  $^n\text{hexane}/i\text{PrOH} = 80/20$ , 0.6 mL/min, 280 nm;  $t_{\text{major}} = 26.2$  min,  $t_{\text{minor}} = 36.1$  min].  $^1\text{H}$  NMR (400 MHz,  $\text{CDCl}_3$ )  $\delta$  7.91 (d,  $J = 7.5$  Hz, 1H), 7.70-7.58 (m, 4H), 6.84-6.80 (m, 2H), 3.79 (s, 3H), 3.68 (d,  $J = 16.5$  Hz, 1H), 3.41 (d,  $J = 16.5$  Hz, 1H).  $^{13}\text{C}$  NMR (100 MHz,  $\text{CDCl}_3$ )  $\delta$  169.9, 157.4, 142.5, 134.9, 134.3, 133.6, 133.4, 130.5, 125.4, 125.3 (q,  $J = 283.0$  Hz), 123.5, 117.1, 112.6, 111.5, 74.5 (q,  $J = 30.0$  Hz), 55.7, 34.9.  $^{19}\text{F}$  NMR (377 MHz,  $\text{CDCl}_3$ )  $\delta$  -79.8 ppm. HRMS  $m/z$  (ESI $^+$ ): Calcd for  $\text{C}_{17}\text{H}_{12}\text{F}_3\text{NONa}^+$  ( $\text{M}+\text{Na}$ ) $^+$  342.0712, found 362.0713.

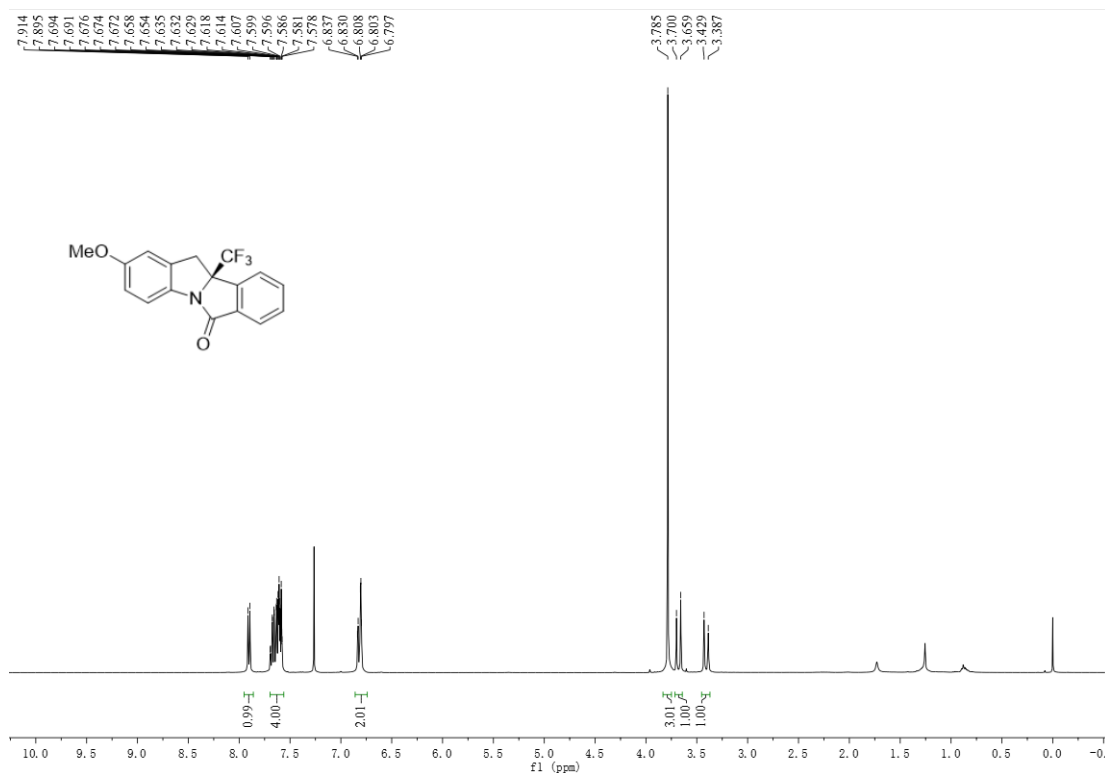

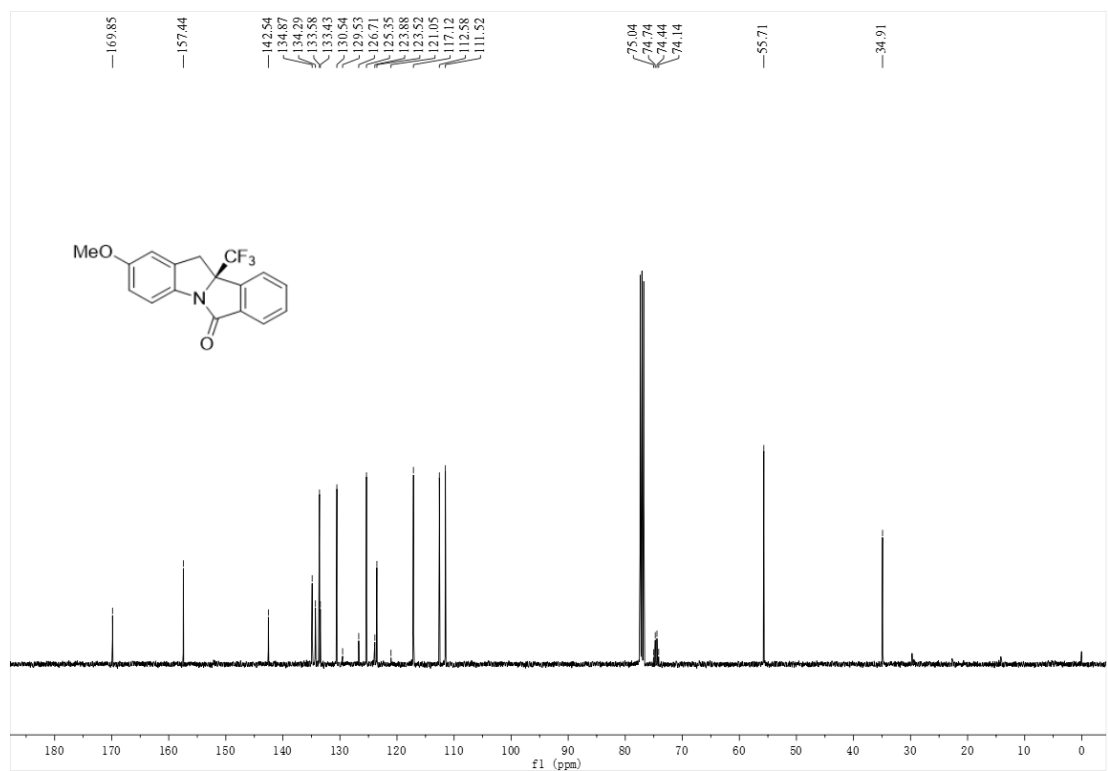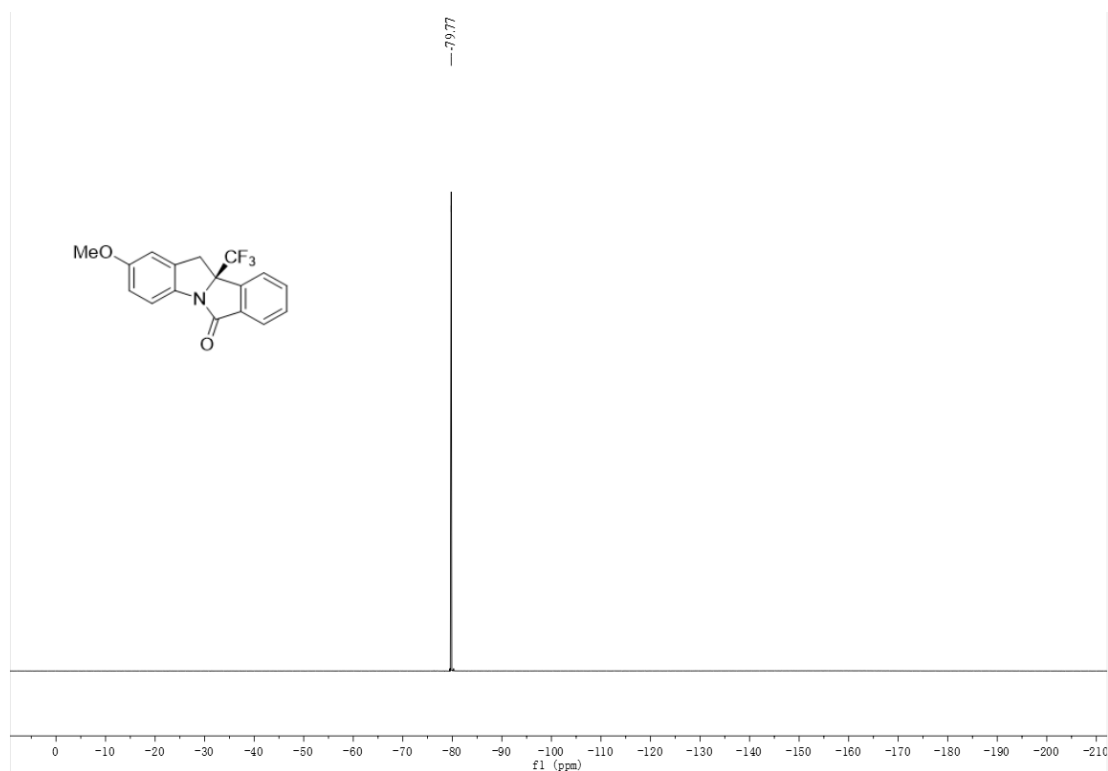

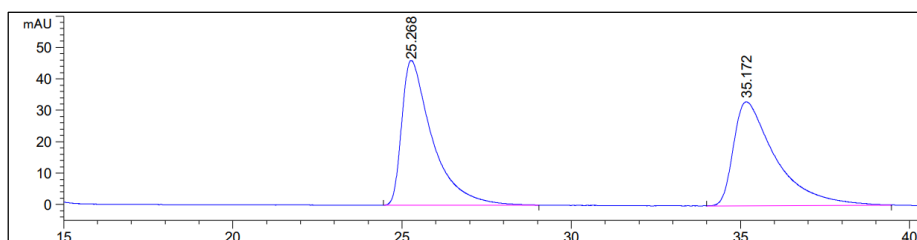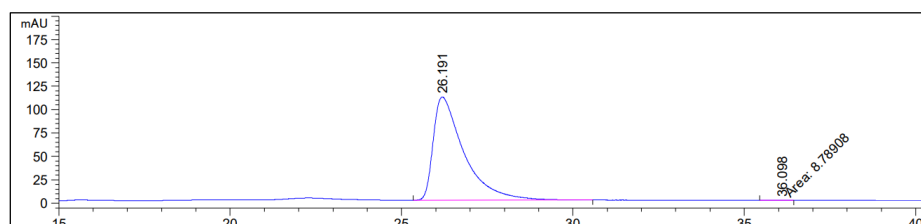

| Peak # | RetTime [min] | Type | Width [min] | Area [mAU*s] | Height [mAU] | Area %  |
|--------|---------------|------|-------------|--------------|--------------|---------|
| 1      | 26.191        | BB   | 0.9087      | 6874.49170   | 110.36417    | 99.9251 |
| 2      | 36.098        | MM   | 0.6438      | 5.15245      | 1.33389e-1   | 0.0749  |

**(R)-10b-(Difluoromethyl)-10b,11-dihydro-6H-isoindolo[2,1-a]indol-6-one (2t):**

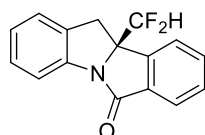

Purified by chromatography on silica gel, eluting with ethyl acetate/petroleum ether 1:50 (v/v); colorless liquid (51% yield).  $[\alpha]_D^{20} = +206.5$  (c 0.5,  $\text{CH}_2\text{Cl}_2$ ), 98% ee [Daicel Chiralpak OJ-H column (25 cm  $\times$  0.46 cm ID), "hexane/PrOH = 90/10, 0.6 mL/min, 280 nm;  $t_{\text{major}} = 21.5$  min,  $t_{\text{minor}} = 26.3$  min].  $^1\text{H}$  NMR (600 MHz,  $\text{CDCl}_3$ )  $\delta$  7.90 (d,  $J = 7.5$  Hz, 1H), 7.69-7.61 (m, 3H), 7.57 (t,  $J = 7.4$  Hz, 1H), 7.29 (t,  $J = 7.7$  Hz, 1H), 7.23 (d,  $J = 7.4$  Hz, 1H), 7.10 (t,  $J = 7.5$  Hz, 1H), 5.76 (t,  $J = 55.8$  Hz, 1H), 3.65 (d,  $J = 16.2$  Hz, 1H), 3.31 (d,  $J = 16.2$  Hz, 1H).  $^{13}\text{C}$  NMR (150 MHz,  $\text{CDCl}_3$ )  $\delta$  169.4, 143.6 (d,  $J = 3.0$  Hz), 140.4, 133.9 (d,  $J = 34.5.0$  Hz), 133.4, 130.1, 128.3, 125.2, 125.1 (d,  $J = 13.5.0$  Hz), 124.2, 117.1, 116.7, 115.4, 113.7, 74.1 (t,  $J = 24.0$  Hz), 33.2.  $^{19}\text{F}$  NMR (565 MHz,  $\text{CDCl}_3$ )  $\delta$  -128.67 (ddd,  $J = 706.6, 281.1, 55.6$  Hz, 2F). HRMS  $m/z$  (ESI+): Calcd for  $\text{C}_{16}\text{H}_{11}\text{F}_2\text{NONa}^+$  ( $\text{M}+\text{Na}$ ) $^+$  294.0701, found 294.0700.

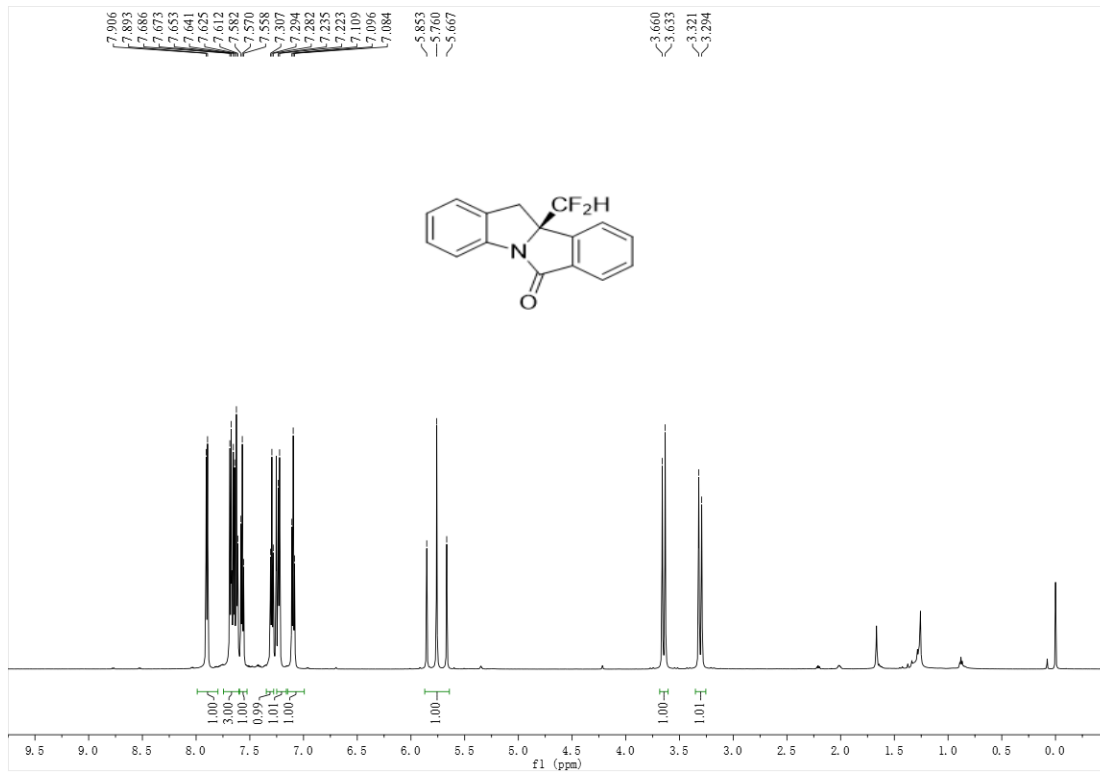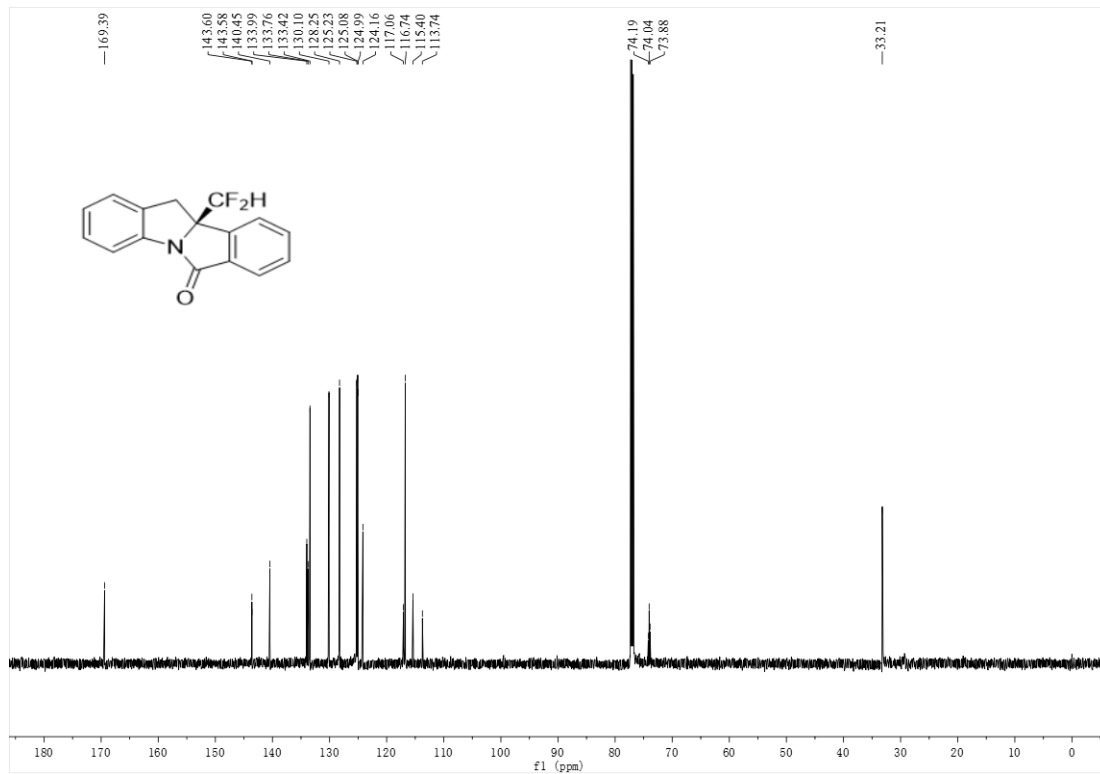

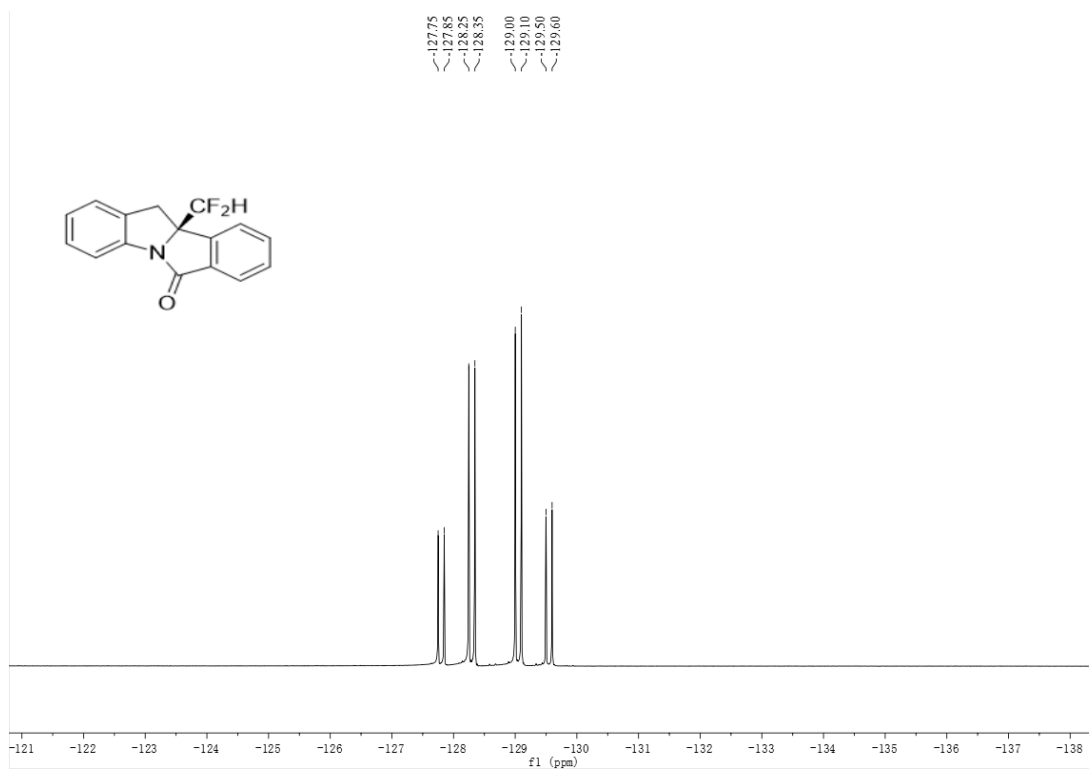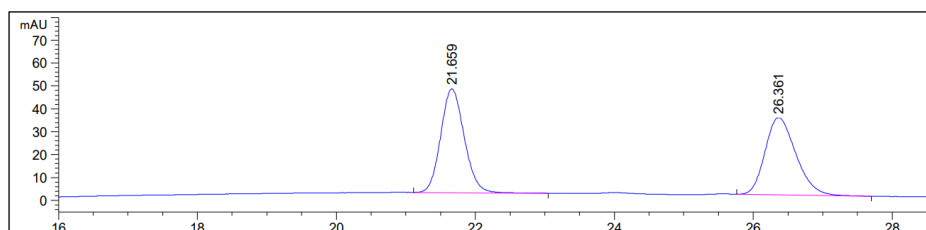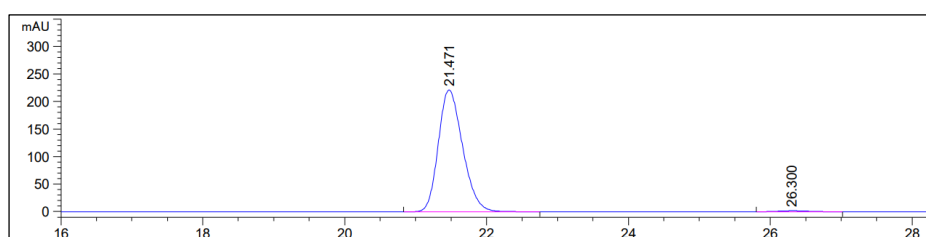

| Peak # | RetTime [min] | Type | Width [min] | Area [mAU*s] | Height [mAU] | Area %  |
|--------|---------------|------|-------------|--------------|--------------|---------|
| 1      | 21.471        | BB   | 0.3677      | 5267.42529   | 221.33359    | 98.9457 |
| 2      | 26.300        | BB   | 0.3607      | 56.12598     | 1.87807      | 1.0543  |



## 5. Procedure for enantioselective Heck-Suzuki reaction of **1** with Ar<sub>4</sub>BNa

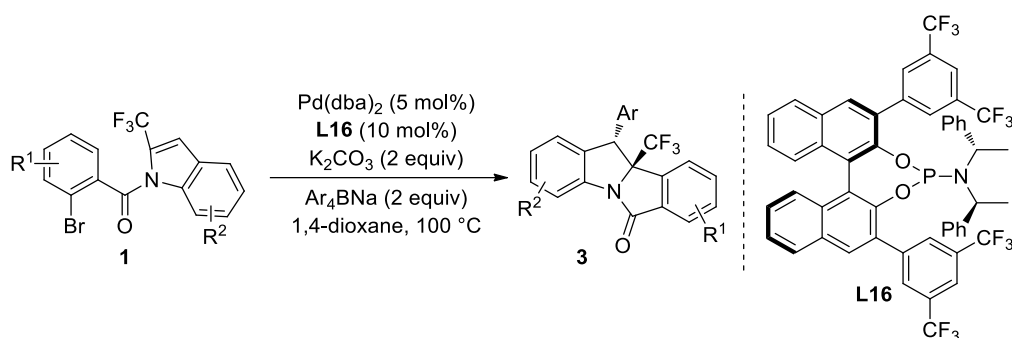

To a dried Schlenk tube were charged with Pd(dba)<sub>2</sub> (5 mol%, 5.8 mg), chiral ligand **L16** (10 mol%, 19.2 mg), substrate **1** (0.2 mmol), K<sub>2</sub>CO<sub>3</sub> (0.4 mmol, 55.2 mg), and Ar<sub>4</sub>BNa (0.4 mmol) under N<sub>2</sub> atmosphere. 1,4-Dioxane (2.0 mL) was then introduced via a syringe and the tube was sealed using Teflon cap. The resulting mixture was stirred at 100 °C until the reaction was completed (monitored by TLC). The solution was then concentrated under reduced pressure and the residue was purified by flash chromatography on silica gel, eluting with ethyl acetate/petroleum ether (v/v = 1/80) to afford product **3**.

### (10*b*R,11*S*)-11-Phenyl-10*b*-(trifluoromethyl)-10*b*,11-dihydro-6*H*-isoindolo[2,1-*a*]indol-6-one (**3a**):

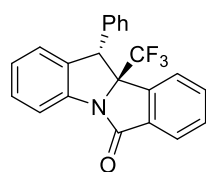

Purified by chromatography on silica gel, eluting with ethyl acetate/petroleum ether 1:80 (v/v); white solid (85% yield), m.p. 169-171 °C.  $[\alpha]_D^{20} = +63.0$  (c 0.5, CH<sub>2</sub>Cl<sub>2</sub>), 95% ee [Daicel Chiralpak AD-H column (25 cm × 0.46 cm ID), <sup>n</sup>hexane/<sup>i</sup>PrOH = 80/20, 0.6 mL/min, 280 nm;  $t_{\text{minor}} = 7.5$  min,  $t_{\text{major}} = 16.2$  min]. <sup>1</sup>H NMR (400 MHz, CDCl<sub>3</sub>) δ 7.85 (d,  $J = 7.9$  Hz, 1H), 7.77 (d,  $J = 7.8$  Hz, 1H), 7.43-7.35 (m, 2H), 7.29 (t,  $J = 7.8$  Hz, 1H), 7.14 (q,  $J = 6.4, 5.3$  Hz, 2H), 7.07 (d,  $J = 7.6$  Hz, 1H), 7.02-7.00 (m, 3H), 6.65 (s, 2H), 4.98 (s, 1H). <sup>13</sup>C NMR (100 MHz, CDCl<sub>3</sub>) δ 170.1, 140.5, 140.1, 139.0, 137.0, 133.3, 132.8, 130.0, 128.9, 128.6, 128.4, 127.6, 125.8, 125.6, 125.4 (q,  $J = 282.0$  Hz), 124.9, 124.7, 116.5, 78.5 (q,  $J = 30.0$  Hz), 51.0. <sup>19</sup>F NMR (377 MHz, CDCl<sub>3</sub>) δ -78.7 ppm. HRMS  $m/z$  (ESI<sup>+</sup>): Calcd for C<sub>22</sub>H<sub>14</sub>F<sub>3</sub>NONa<sup>+</sup> (M+Na)<sup>+</sup> 388.0919, found 388.0915.

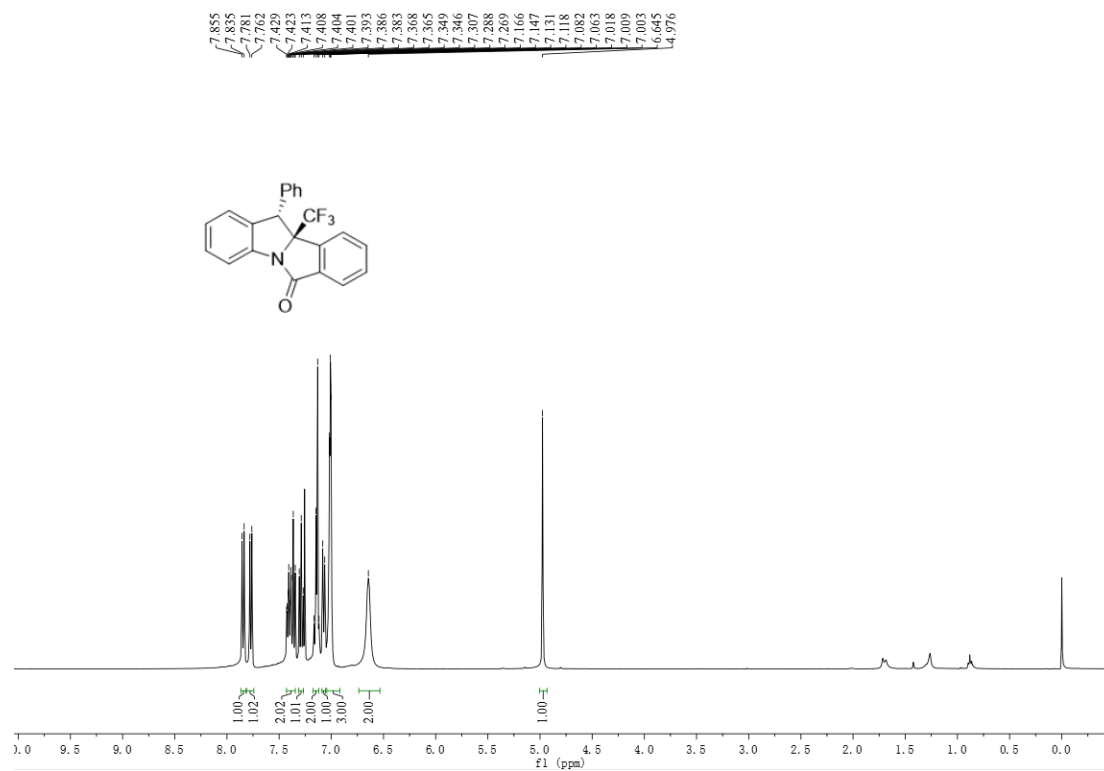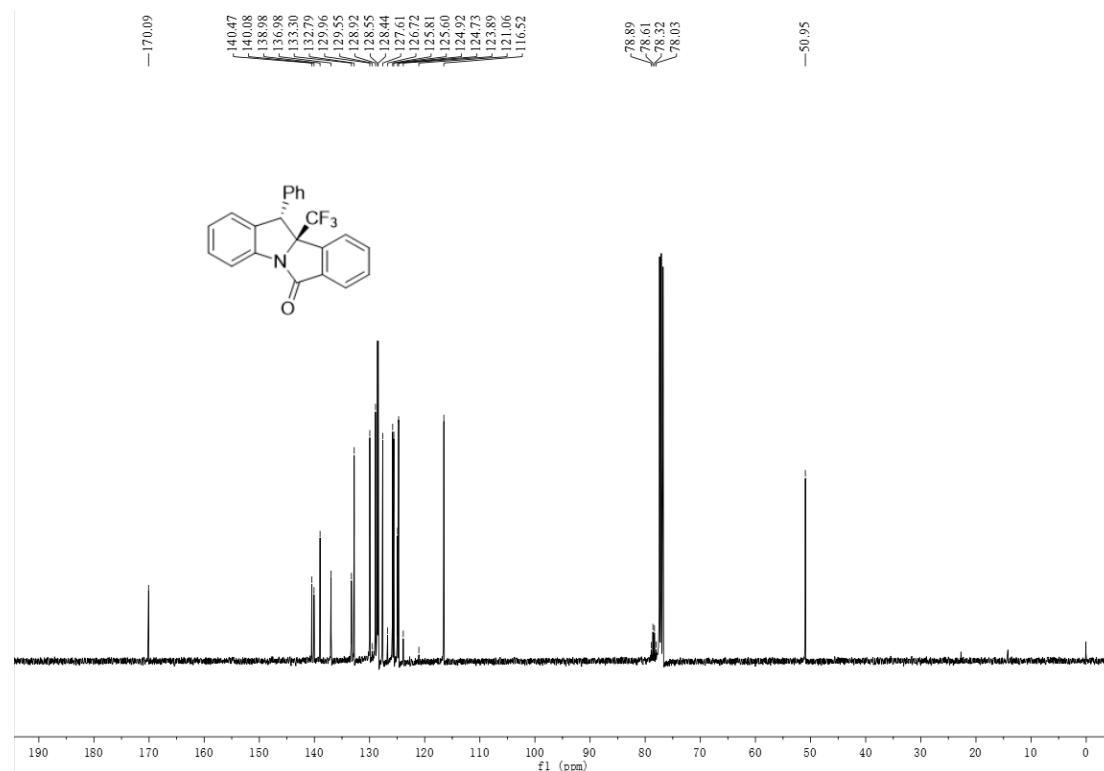

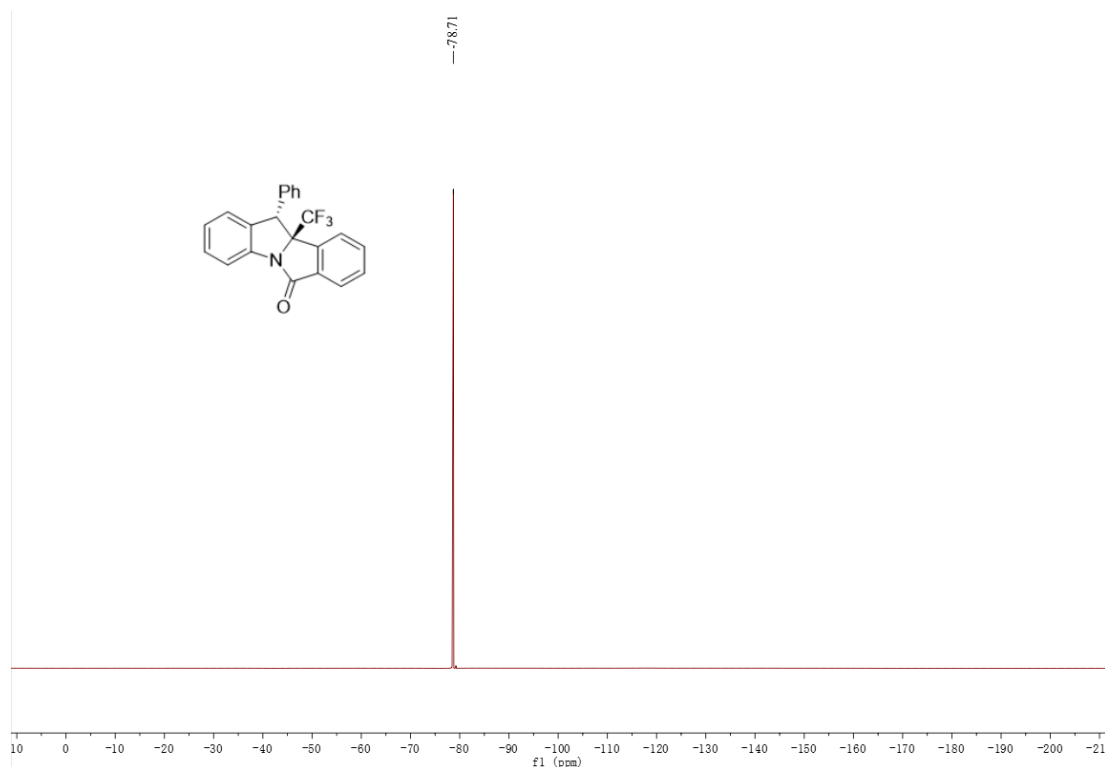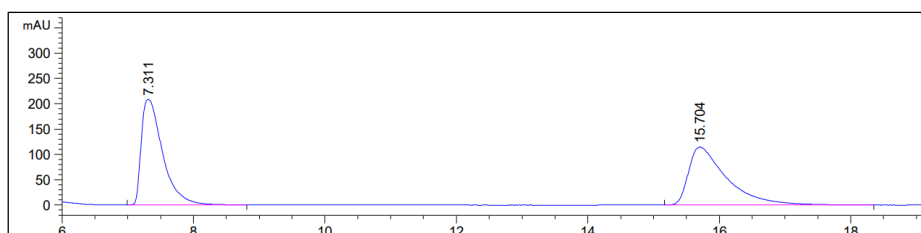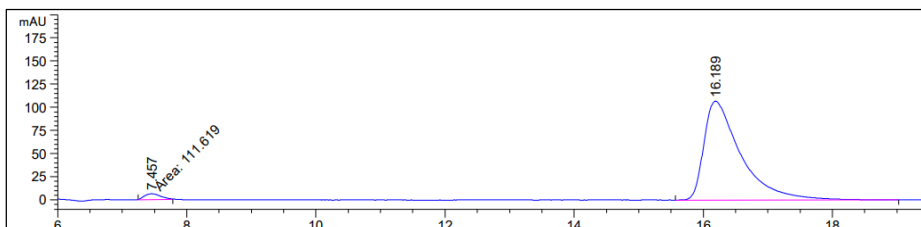

| Peak # | RetTime [min] | Type | Width [min] | Area [mAU*s] | Height [mAU] | Area %  |
|--------|---------------|------|-------------|--------------|--------------|---------|
| 1      | 7.462         | BB   | 0.3172      | 167.40544    | 8.03098      | 2.3374  |
| 2      | 16.171        | BB   | 0.5812      | 6994.52881   | 176.15477    | 97.6626 |

**(10bR,11S)-9-Methoxy-11-phenyl-10b-(trifluoromethyl)-10b,11-dihydro-6H-isoindolo[2,1-a]indol-6-one (3b):**

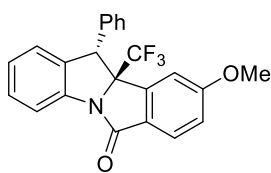

Purified by chromatography on silica gel, eluting with ethyl acetate/petroleum ether 1:80 (v/v); white solid (68% yield), m.p. 124-126 °C.  $[\alpha]_D^{20} = +44.5$  (c 0.5, CH<sub>2</sub>Cl<sub>2</sub>), 83% ee [Daicel Chiralpak OD-H column (25 cm × 0.46 cm ID), "hexane"/PrOH = 80/20, 0.6 mL/min, 280 nm;  $t_{\text{minor}} = 7.3$  min,  $t_{\text{major}} = 8.3$  min].

$^1\text{H}$  NMR (600 MHz,  $\text{CDCl}_3$ )  $\delta$  7.81 (d,  $J = 7.9$  Hz, 1H), 7.66 (d,  $J = 8.5$  Hz, 1H), 7.39 (ddd,  $J = 8.2, 6.9, 2.0$  Hz, 1H), 7.13-7.09 (m, 2H), 7.04 (t,  $J = 2.9$  Hz, 3H), 6.86 (dd,  $J = 8.5, 2.3$  Hz, 1H), 6.68 (s, 2H), 6.46 (s, 1H), 4.95 (s, 1H), 3.65 (s, 3H).  $^{13}\text{C}$  NMR (100 MHz,  $\text{CDCl}_3$ )  $\delta$  170.2, 163.4, 142.7, 141.0, 139.0, 136.5, 134.7, 128.9, 128.6, 128.5, 127.7, 126.1, 125.7, 125.5, 125.4 (q,  $J = 282.0$  Hz), 125.3, 116.9, 116.4, 109.6, 77.9 (q,  $J = 30.0$  Hz), 55.6, 51.1.  $^{19}\text{F}$  NMR (377 MHz,  $\text{CDCl}_3$ )  $\delta$  -78.7 ppm. HRMS  $m/z$  (ESI+): Calcd for  $\text{C}_{23}\text{H}_{16}\text{F}_3\text{NO}_2\text{Na}^+$  ( $\text{M}+\text{Na}$ ) $^+$  418.1025, found 418.1025.

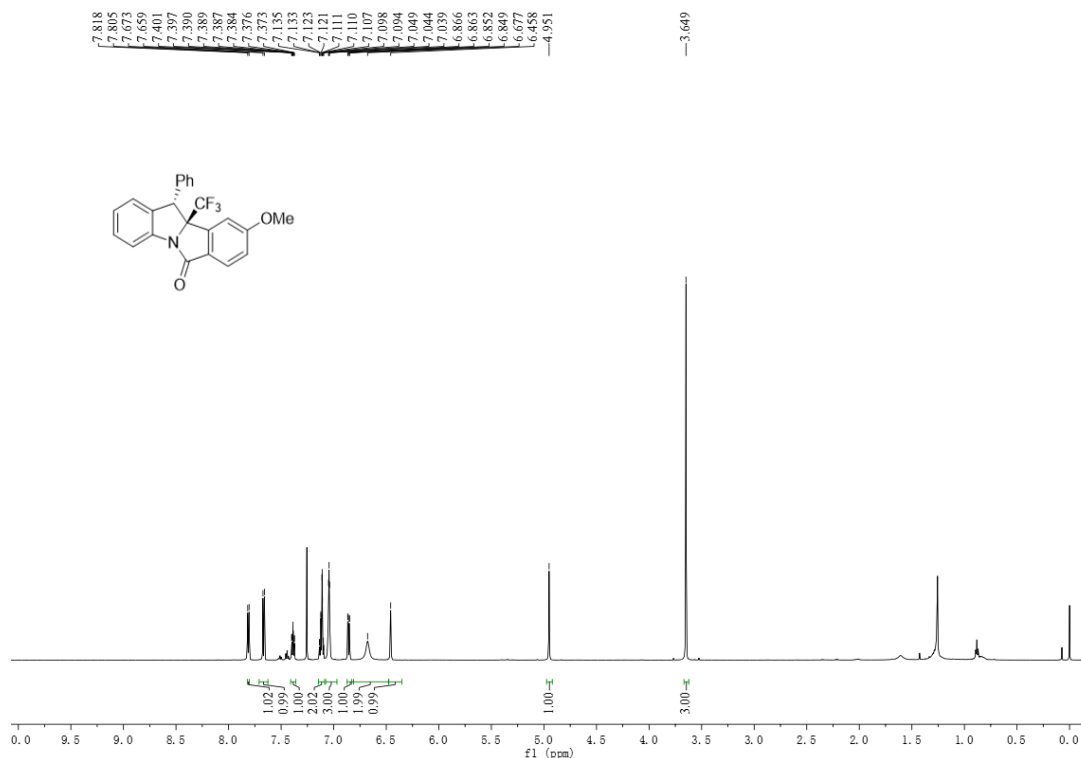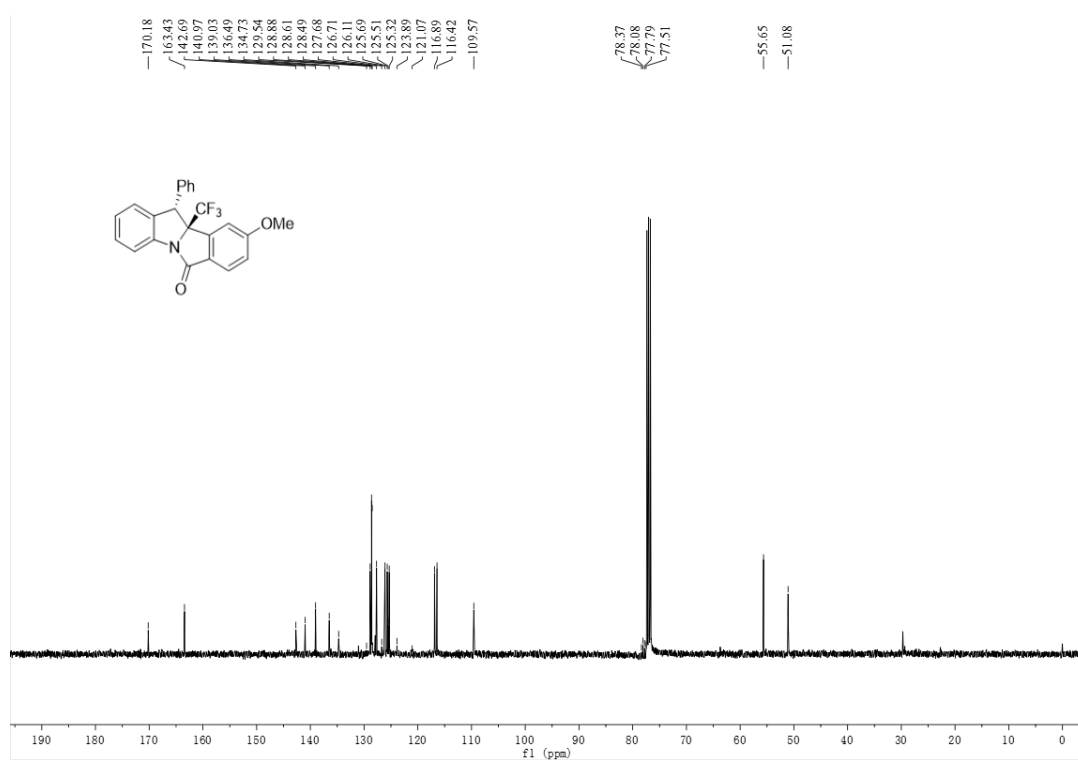

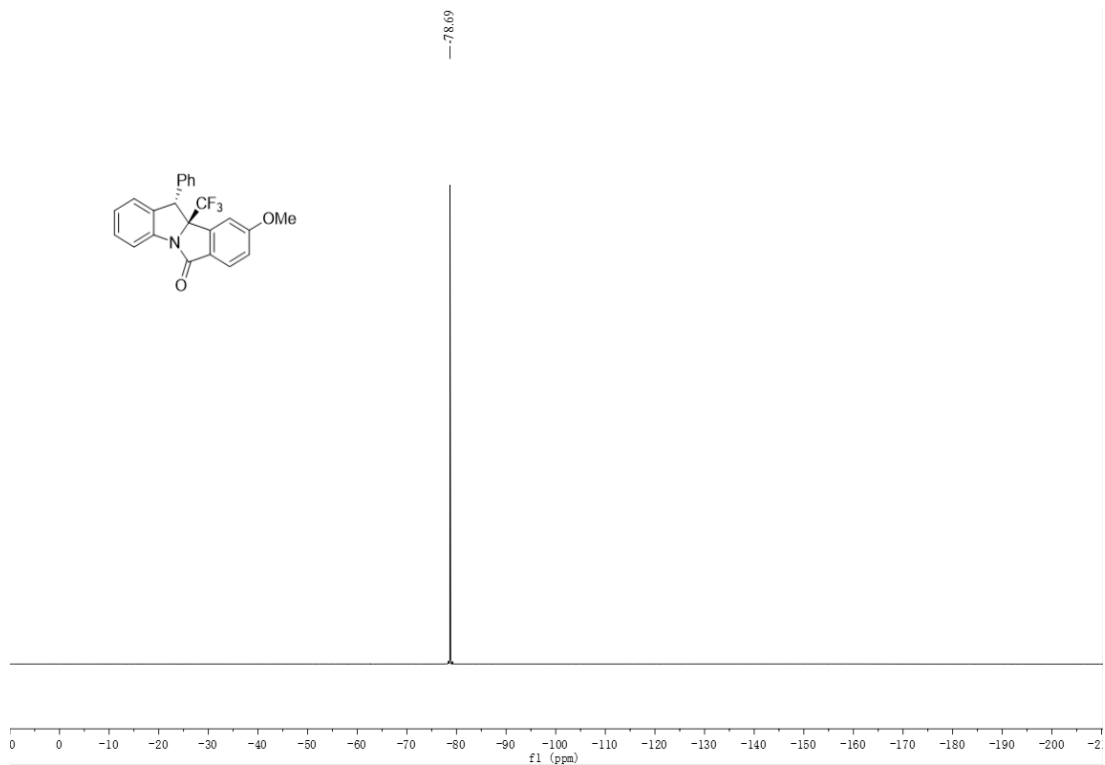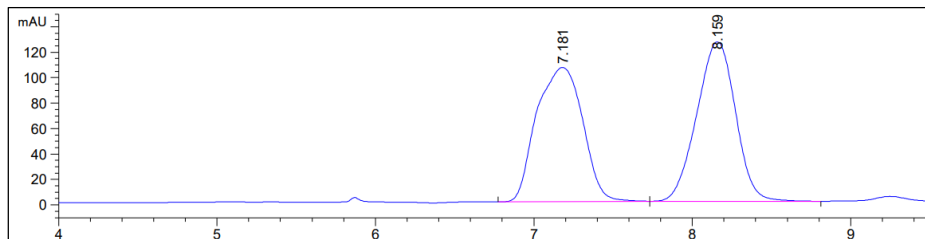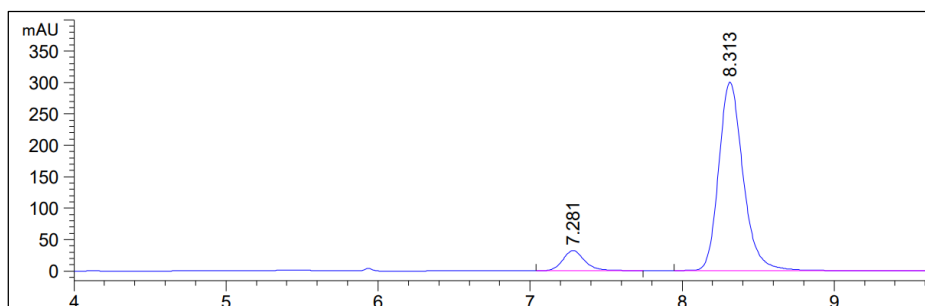

| Peak # | RetTime [min] | Type | Width [min] | Area [mAU*s] | Height [mAU] | Area %  |
|--------|---------------|------|-------------|--------------|--------------|---------|
| 1      | 7.281         | BB   | 0.1528      | 321.30090    | 32.08439     | 8.7909  |
| 2      | 8.313         | BB   | 0.1716      | 3333.60815   | 300.20120    | 91.2091 |

**(10*b*R,11*S*)-9-Methyl-11-phenyl-10*b*-(trifluoromethyl)-10*b*,11-dihydro-6*H*-isoindolo[2,1-*a*]indol-6-one (3*c*):**

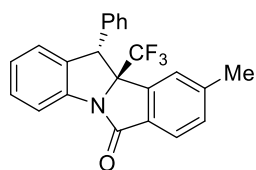

Purified by chromatography on silica gel, eluting with ethyl acetate/petroleum ether 1:80 (v/v); colorless liquid (74% yield).  $[\alpha]_D^{20} = +22.2$  (c 0.5, CH<sub>2</sub>Cl<sub>2</sub>), 94% ee [Daicel Chiralpak AD-H column (25 cm × 0.46 cm ID), *n*hexane/*i*PrOH = 80/20, 0.6 mL/min, 254 nm;  $t_{\text{minor}} = 7.2$  min,  $t_{\text{major}} = 13.7$  min]. <sup>1</sup>H NMR (600 MHz, CDCl<sub>3</sub>) δ 7.83 (d, *J* = 7.9 Hz, 1H), 7.64 (d, *J* = 7.8 Hz, 1H), 7.41-7.38 (m, 1H), 7.16-7.12 (m, 3H), 7.01 (t, *J* = 2.5 Hz, 2H), 6.83 (s, 1H), 6.64 (s, 2H), 4.95 (s, 1H), 2.20 (s, 3H). <sup>13</sup>C NMR (151 MHz, CDCl<sub>3</sub>) δ 170.2, 143.8, 140.8, 140.5, 139.0, 136.8, 130.8, 130.7, 128.8, 128.6, 128.5, 128.4, 125.7, 125.5, 125.4, 125.37 (q, *J* = 282.0 Hz), 124.5, 116.5, 78.2 (q, *J* = 30.0 Hz), 51.0, 21.8. <sup>19</sup>F NMR (377 MHz, CDCl<sub>3</sub>) δ -78.7 ppm. HRMS *m/z* (ESI+): Calcd for C<sub>23</sub>H<sub>16</sub>F<sub>3</sub>NONa<sup>+</sup> (M+Na)<sup>+</sup> 402.1076, found 402.1077.

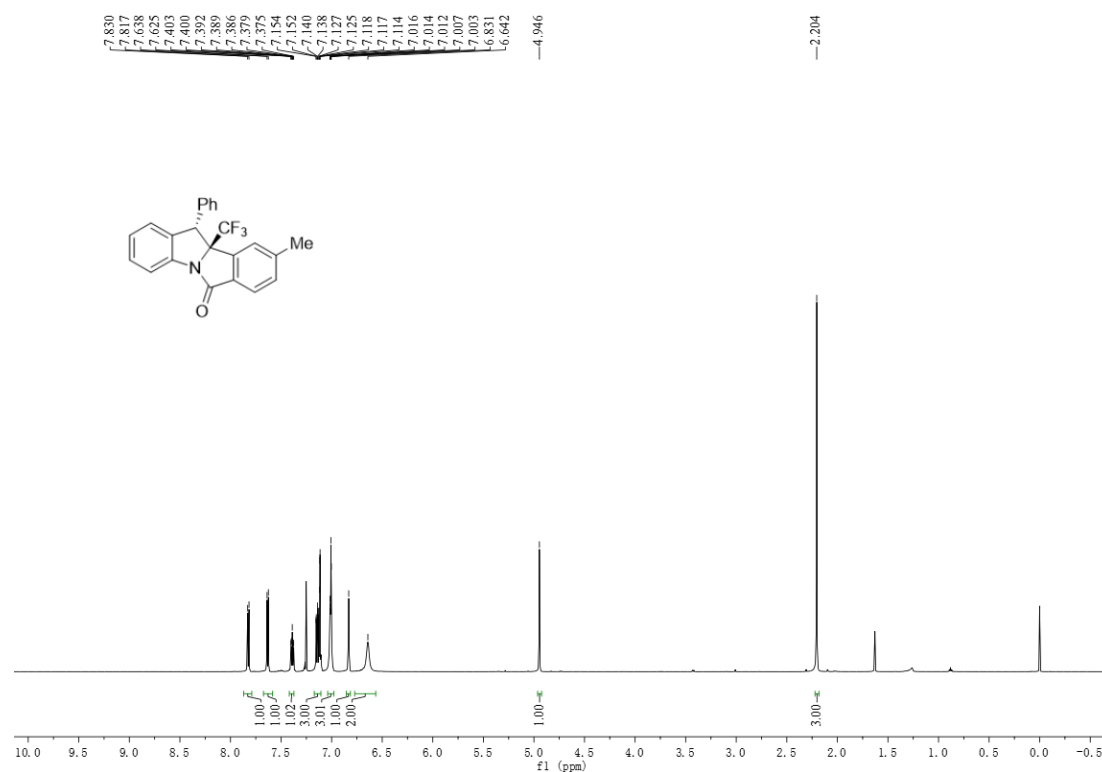

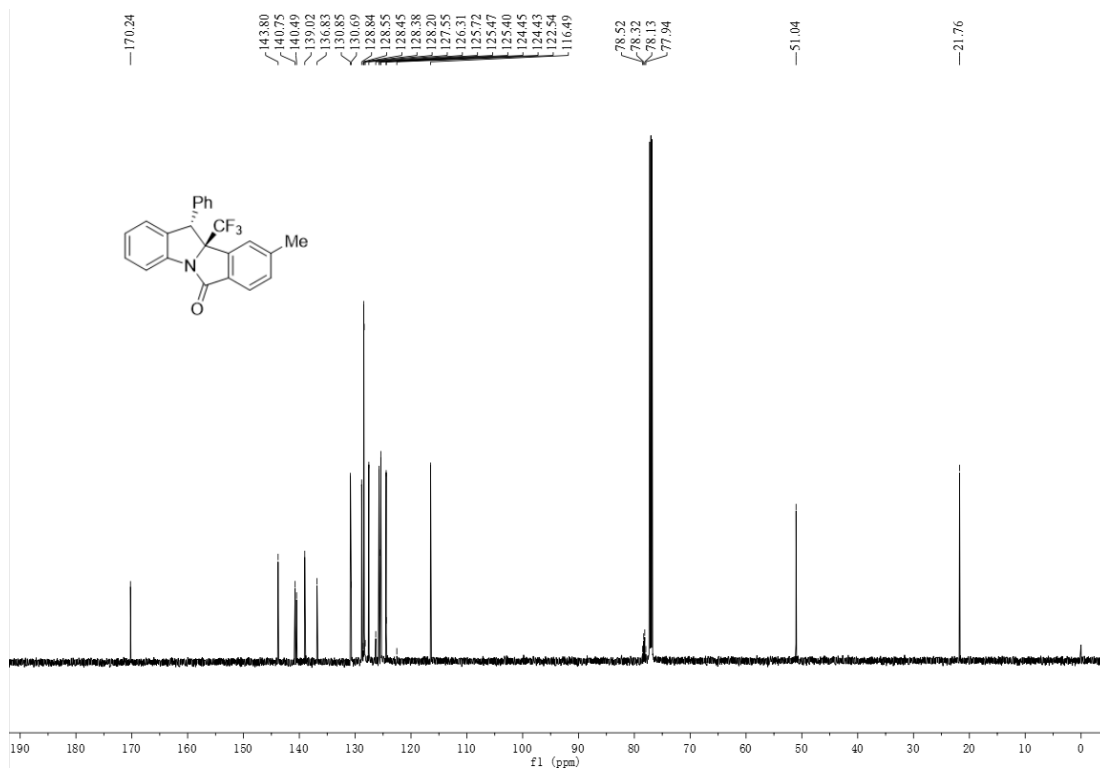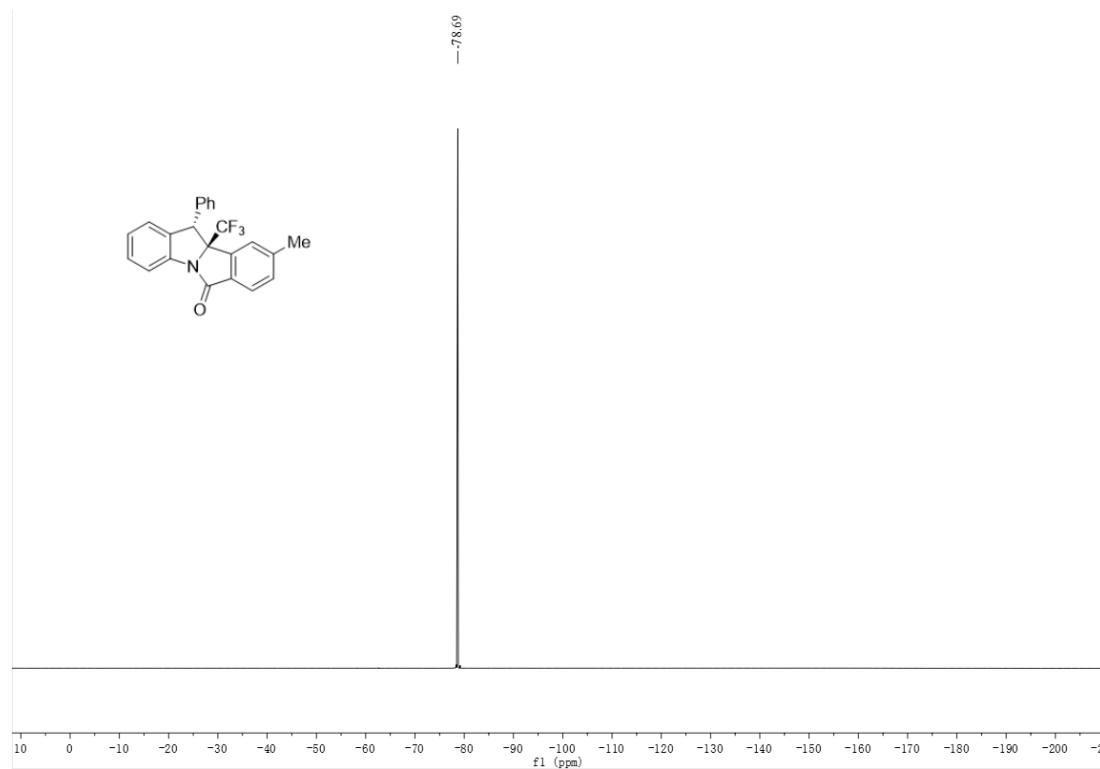

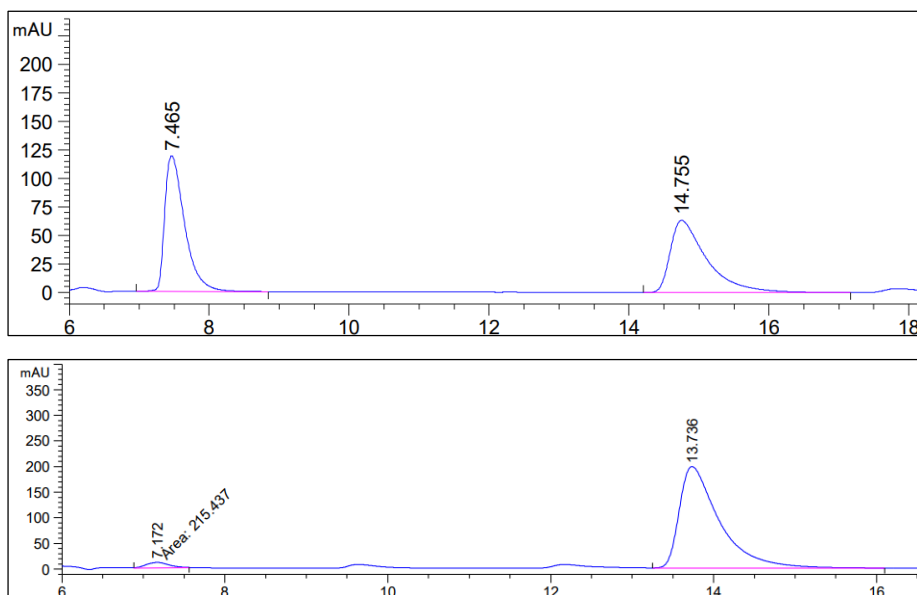

| Peak # | RetTime [min] | Type | Width [min] | Area [mAU*s] | Height [mAU] | Area %  |
|--------|---------------|------|-------------|--------------|--------------|---------|
| 1      | 7.172         | MM   | 0.3300      | 215.43733    | 10.88221     | 3.0945  |
| 2      | 13.736        | BB   | 0.5034      | 6746.43994   | 198.05679    | 96.9055 |

**(10*R*,11*S*)-9-Phenyl-11-Phenyl-10*b*-(trifluoromethyl)-10*b*,11-dihydro-6*H*-isoindolo[2,1-*a*]indol-6-one (3*d*):**

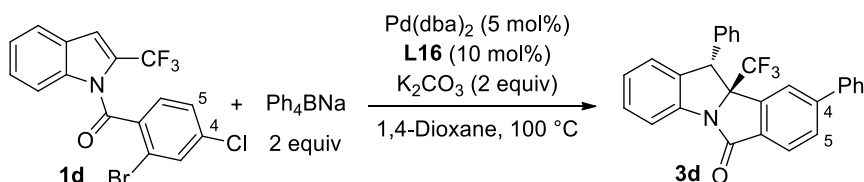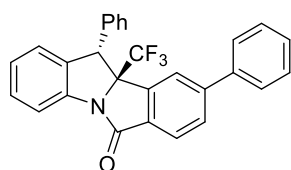

Purified by chromatography on silica gel, eluting with ethyl acetate/petroleum ether 1:80 (v/v); white solid (80% yield).  $[\alpha]_D^{20} = -36.8$  (c 0.5,  $\text{CH}_2\text{Cl}_2$ ), 99% ee [Daicel Chiralpak A2 column (25 cm  $\times$  0.46 cm ID),  $n^{\text{hexane}}/i\text{PrOH} = 90/10$ , 0.6 mL/min, 210 nm;  $t_{\text{minor}} = 9.8$  min,  $t_{\text{major}} = 14.3$  min].  $^1\text{H}$  NMR (600 MHz,  $\text{CDCl}_3$ )  $\delta$  7.99 (d,  $J = 1.7$  Hz, 1H), 7.86 (d,  $J = 7.9$  Hz, 1H), 7.52 (dt,  $J = 8.1, 1.6$  Hz, 3H), 7.43-7.41 (m, 3H), 7.37-7.35 (m, 1H), 7.16-7.11 (m, 3H), 7.05-7.01 (m, 3H), 6.68 (s, 2H), 5.00 (s, 1H).  $^{13}\text{C}$  NMR (150 MHz,  $\text{CDCl}_3$ )  $\delta$  167.0, 143.0, 140.5, 139.1, 139.0, 138.8, 136.9, 134.1, 131.6, 129.0, 128.9, 128.6, 128.5, 128.2, 127.7, 127.2, 125.8, 125.6, 125.3 (q,  $J = 282$  Hz), 125.2, 122.9, 116.53, 78.4 (q,  $J = 30$  Hz), 51.05.  $^{19}\text{F}$  NMR (377 MHz,  $\text{CDCl}_3$ )  $\delta$  -78.7 ppm. HRMS  $m/z$  (ESI $^+$ ): Calcd for  $\text{C}_{28}\text{H}_{18}\text{F}_3\text{NONa}^+$  ( $\text{M}+\text{Na}$ ) $^+$  464.1233, found 464.1233.



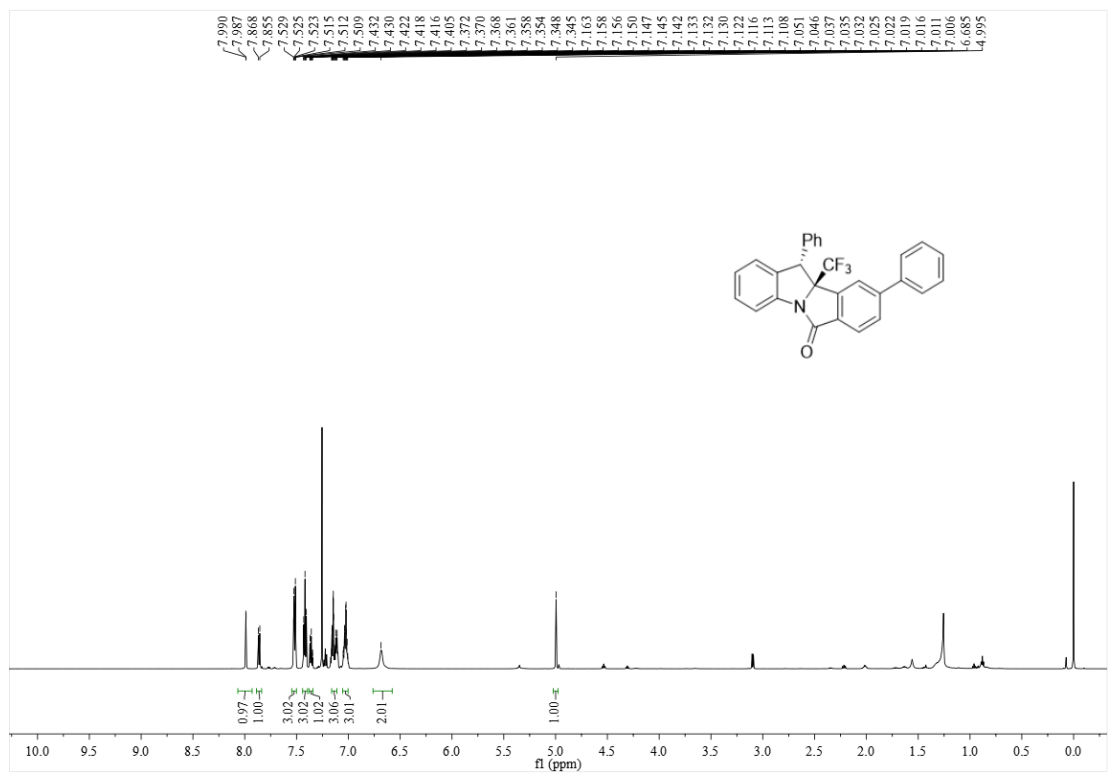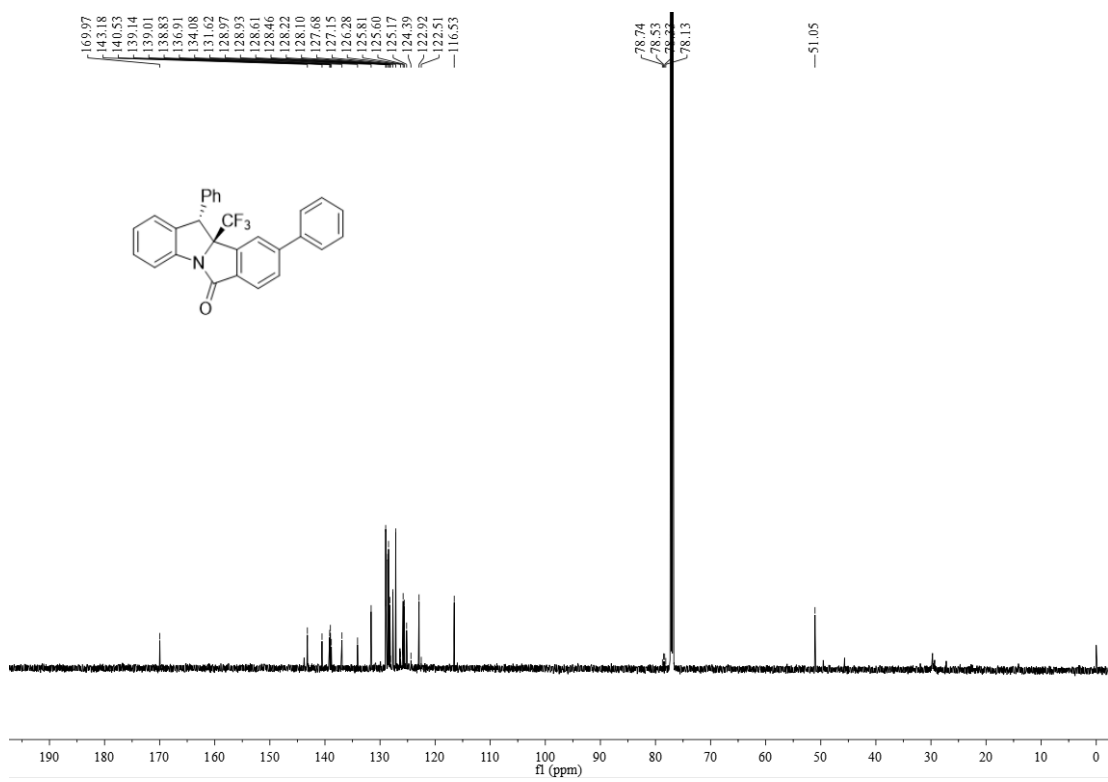

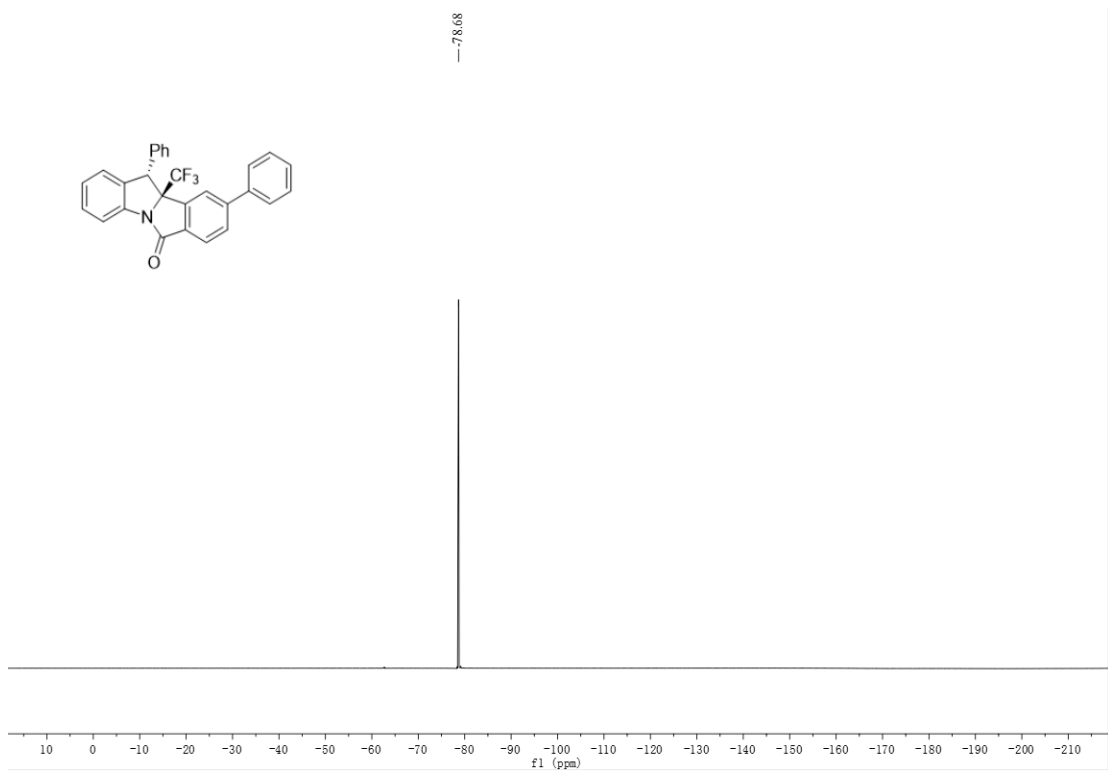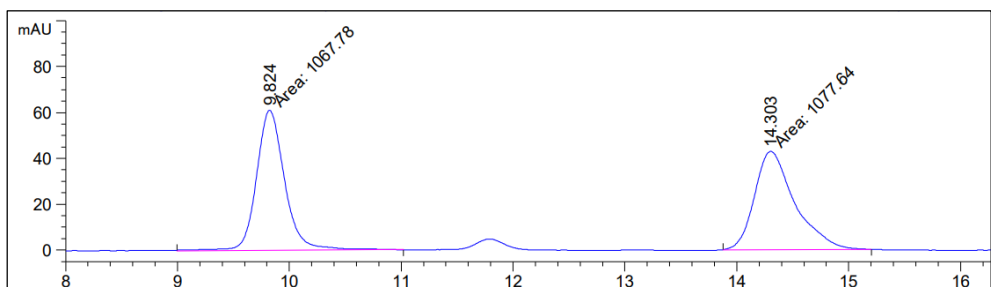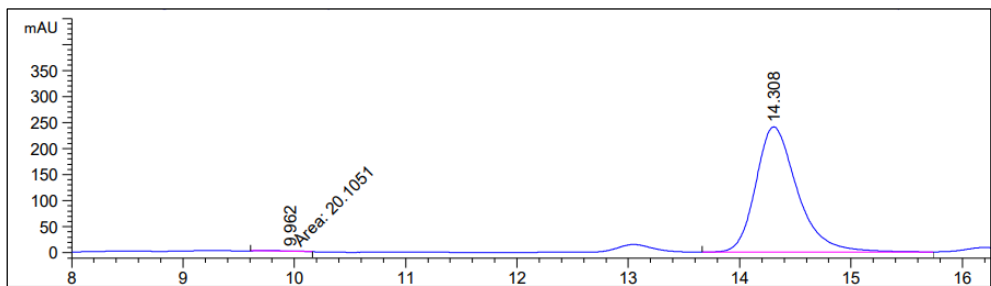

| Peak # | RetTime [min] | Type | Width [min] | Area [mAU*s] | Height [mAU] | Area %  |
|--------|---------------|------|-------------|--------------|--------------|---------|
| 1      | 9.962         | MM   | 0.3776      | 20.10506     | 8.87328e-1   | 0.3216  |
| 2      | 14.308        | BB   | 0.3944      | 6232.12842   | 240.39958    | 99.6784 |

Totals : 6252.23348 241.28691

**(10*b*R,11*S*)-9-Fluoro-11-phenyl-10*b*-(trifluoromethyl)-10*b*,11-dihydro-6*H*-isoindolo[2,1-*a*]indol-6-one (3e):**

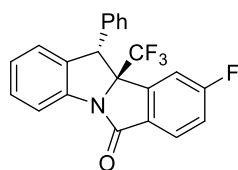

Purified by chromatography on silica gel, eluting with ethyl acetate/petroleum ether 1:80 (v/v); white solid (56% yield), m.p. 150-152 °C.  $[\alpha]_D^{20} = +67.8$  (c 0.5, CH<sub>2</sub>Cl<sub>2</sub>), 77% ee [Daicel Chiralpak C2 column (25 cm × 0.46 cm ID), "hexane/PrOH = 95/05, 0.5 mL/min, 280 nm;  $t_{\text{minor}} = 9.2$  min,  $t_{\text{major}} = 10.1$  min]. <sup>1</sup>H NMR (600 MHz, CDCl<sub>3</sub>) δ 7.82 (d,  $J = 7.9$  Hz, 1H), 7.76 (dd,  $J = 8.4, 4.9$  Hz, 1H), 7.41 (t,  $J = 8.2$  Hz, 1H), 7.20-7.10 (m, 2H), 7.06 (m, 4H), 6.75 (d,  $J = 7.7$  Hz, 2H), 6.65 (s, 2H), 4.96 (s, 1H). <sup>13</sup>C NMR (150 MHz, CDCl<sub>3</sub>) δ 168.9, 165.3 (d,  $J = 253.5$  Hz), 142.7 (d,  $J = 10.5$  Hz), 140.5, 138.5, 136.6, 129.4 (d,  $J = 1.5$  Hz), 129.0, 128.7, 128.3, 127.9, 126.8 (d,  $J = 10.5$  Hz), 125.8 (d,  $J = 7.5$  Hz), 125.0 (q,  $J = 282$  Hz), 117.9, 117.80, 116.5, 112.7, 112.5, 78.1 (q,  $J = 30.0$  Hz), 51.06. <sup>19</sup>F NMR (377 MHz, CDCl<sub>3</sub>) δ -78.7, -103.9 ppm. HRMS  $m/z$  (ESI<sup>+</sup>): Calcd for C<sub>22</sub>H<sub>13</sub>F<sub>4</sub>NONa<sup>+</sup> (M+Na)<sup>+</sup> 406.0826, found 406.0826.

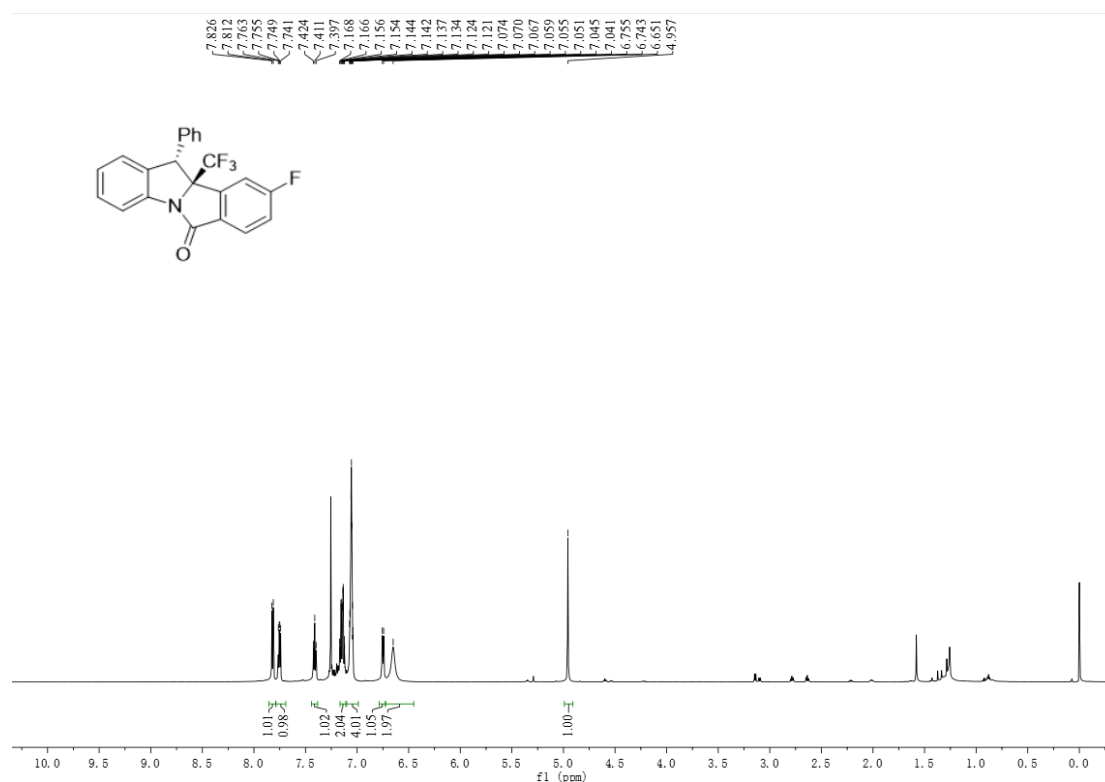

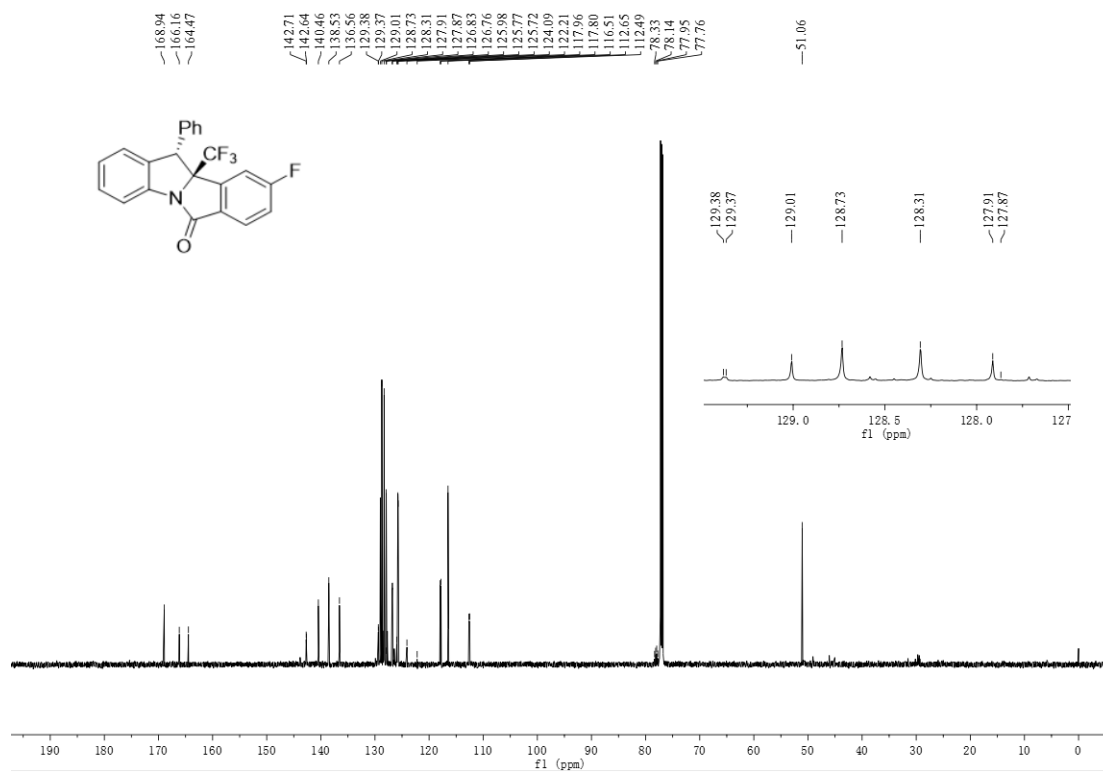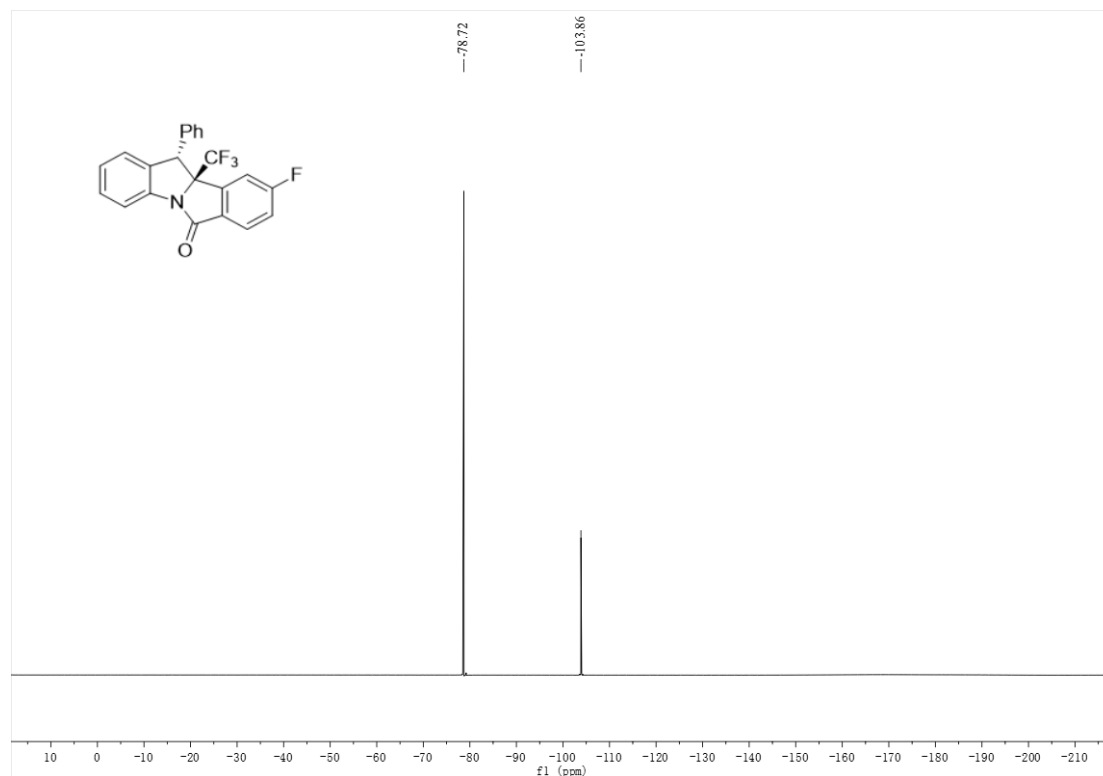

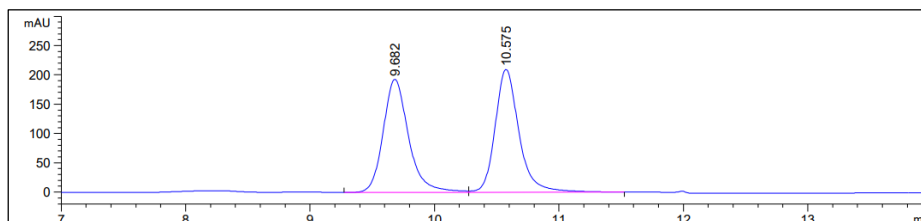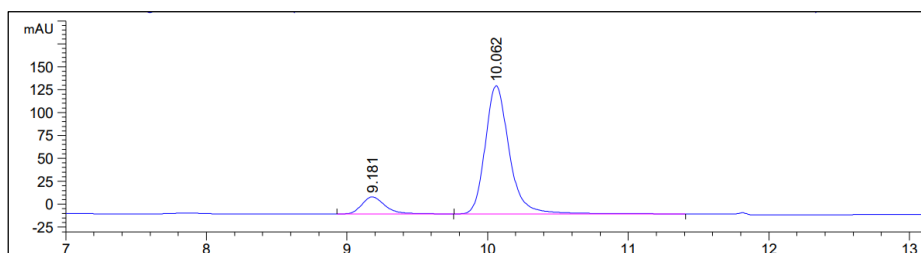

| Peak # | RetTime [min] | Type | Width [min] | Area [mAU*s] | Height [mAU] | Area %  |
|--------|---------------|------|-------------|--------------|--------------|---------|
| 1      | 9.181         | BB   | 0.1759      | 214.13696    | 18.65736     | 11.4118 |
| 2      | 10.062        | BB   | 0.1809      | 1662.31836   | 139.63023    | 88.5882 |

**(10*b*R,11*S*)-8,9-Dimethoxy-11-phenyl-10*b*-(trifluoromethyl)-10*b*,11-dihydro-6*H*-isoindolo[2,1-*a*]indol-6-one(3*f*):**

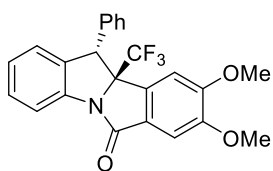

Purified by chromatography on silica gel, eluting with ethyl acetate/petroleum ether 1:50 (v/v); white solid (51% yield), m.p. 150-152 °C.  $[\alpha]_D^{20} = +93.0$  (c 0.5, CH<sub>2</sub>Cl<sub>2</sub>), 82% ee [Daicel Chiralpak OD-H column (25 cm × 0.46 cm ID), "hexane"/i>PrOH = 80/20, 0.6 mL/min, 280 nm;  $t_{\text{minor}} = 8.0$  min,  $t_{\text{major}} = 9.0$  min].

<sup>1</sup>H NMR (400 MHz, CDCl<sub>3</sub>)  $\delta$  7.81 (d,  $J = 7.9$  Hz, 1H), 7.40 (ddd,  $J = 8.3, 6.5, 2.2$  Hz, 1H), 7.19 (s, 1H), 7.15-7.10 (m, 2H), 7.07-7.05 (m, 3H), 6.70 (s, 2H), 6.38 (s, 1H), 4.96 (s, 1H), 3.87 (s, 3H), 3.68 (s, 3H). <sup>13</sup>C NMR (100 MHz, CDCl<sub>3</sub>)  $\delta$  170.8, 153.2, 150.8, 141.0, 139.3, 136.4, 134.5, 128.9, 128.7, 128.5, 127.7, 125.8, 125.5, 125.4 (q,  $J = 282.0$  Hz), 125.3, 116.4, 106.7, 105.6, 78.9 (q,  $J = 30.0$  Hz), 56.2, 50.9. <sup>19</sup>F NMR (377 MHz, CDCl<sub>3</sub>)  $\delta$  -79.0 ppm. HRMS  $m/z$  (ESI+): Calcd for C<sub>24</sub>H<sub>18</sub>F<sub>3</sub>NO<sub>3</sub>Na<sup>+</sup> (M+Na)<sup>+</sup> 448.1131, found 448.1130.

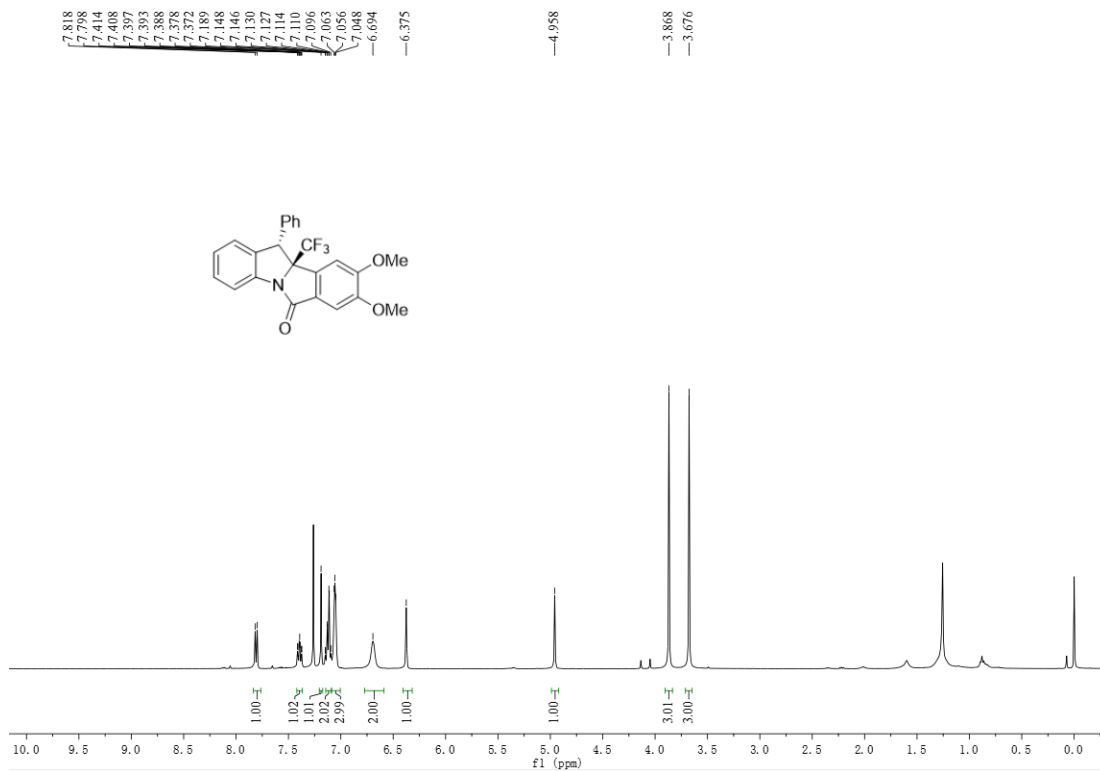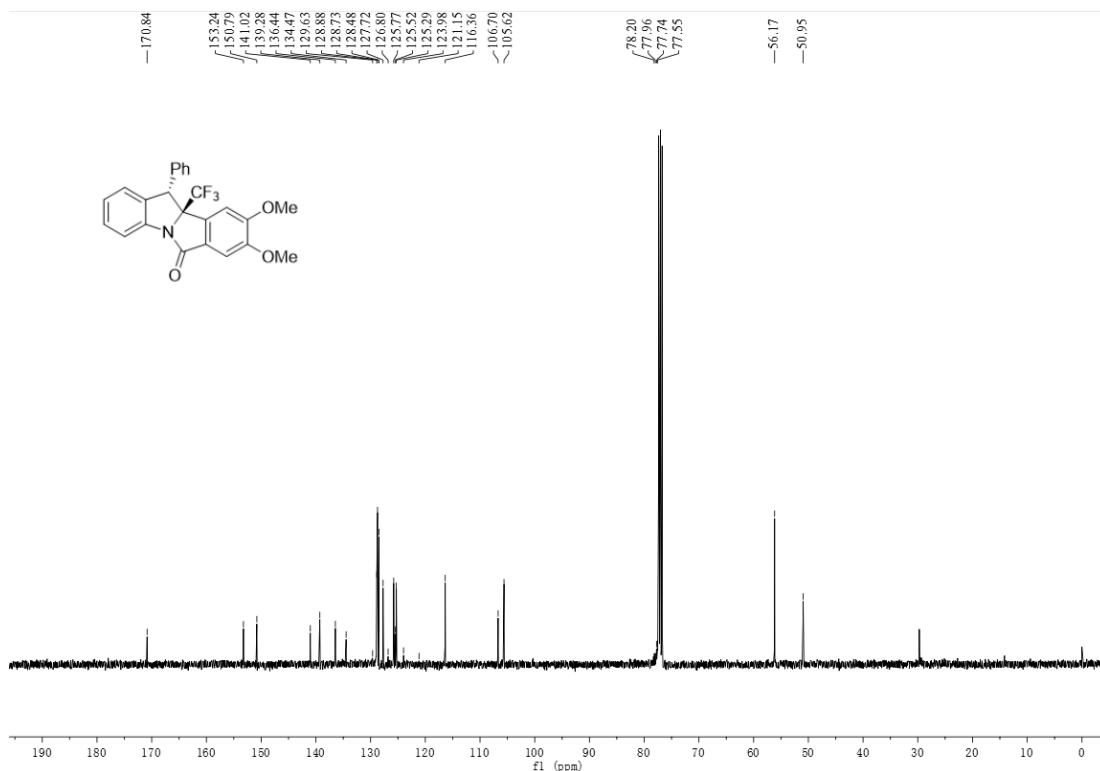

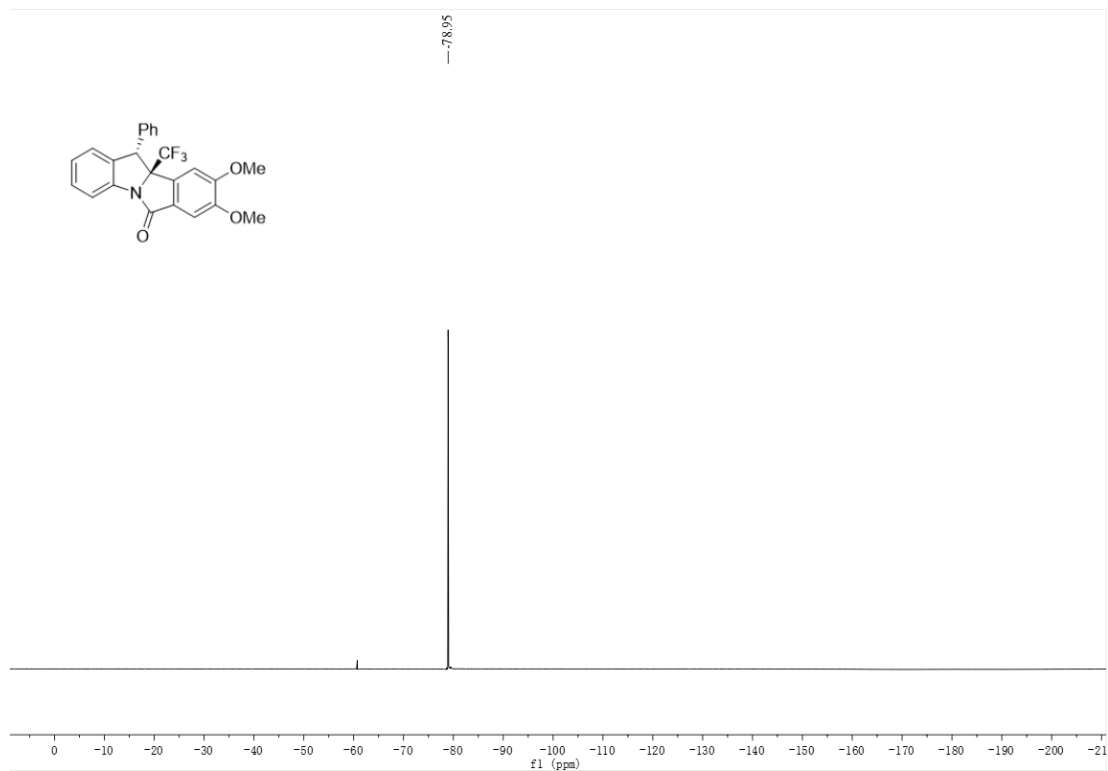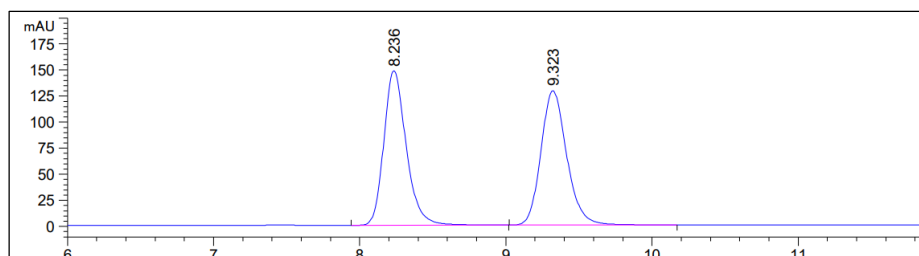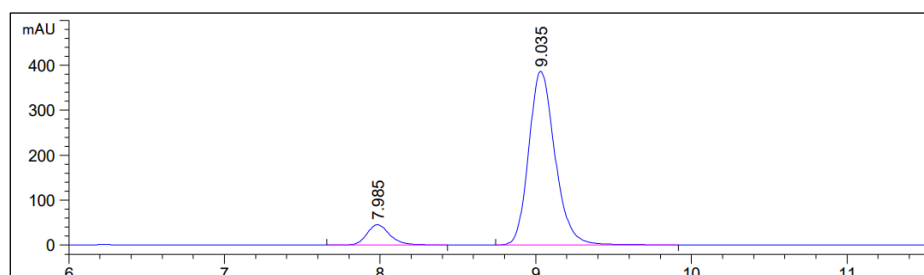

| Peak # | RetTime [min] | Type | Width [min] | Area [mAU*s] | Height [mAU] | Area %  |
|--------|---------------|------|-------------|--------------|--------------|---------|
| 1      | 7.985         | BB   | 0.1542      | 455.26437    | 44.95000     | 9.1564  |
| 2      | 9.035         | BB   | 0.1805      | 4516.83936   | 386.17456    | 90.8436 |





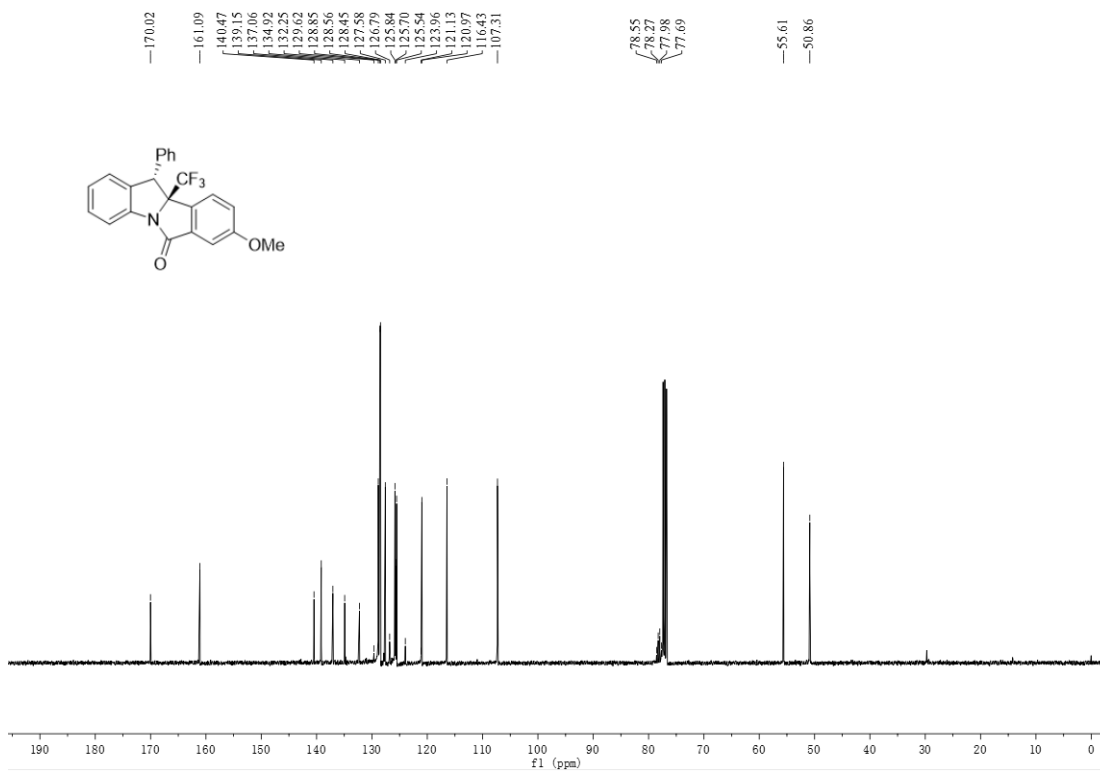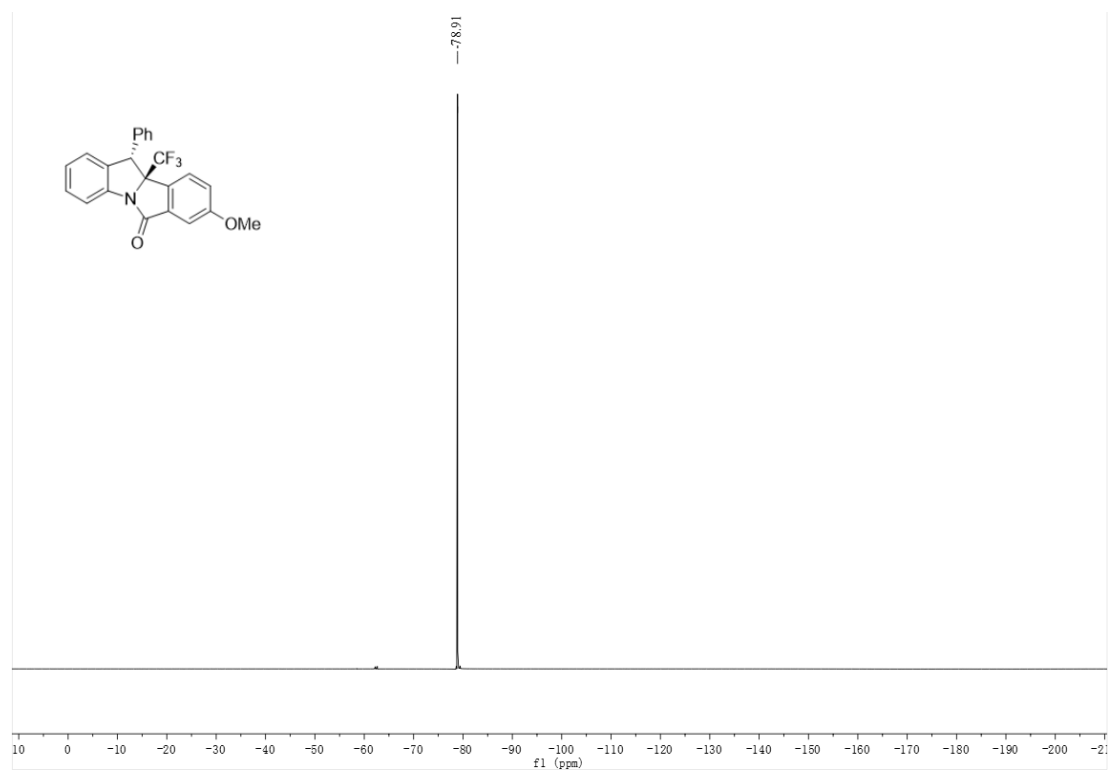

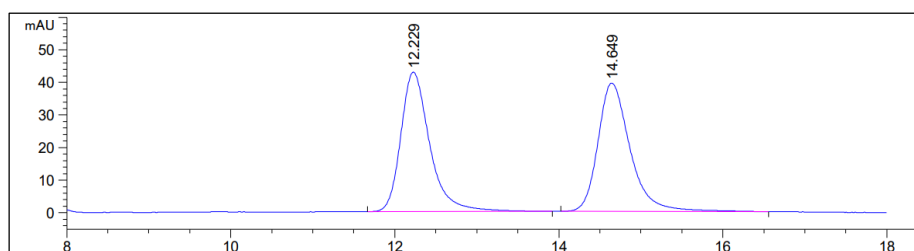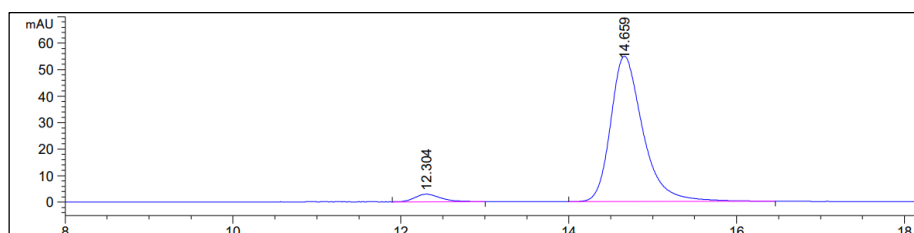

| Peak # | RetTime [min] | Type | Width [min] | Area [mAU*s] | Height [mAU] | Area %  |
|--------|---------------|------|-------------|--------------|--------------|---------|
| 1      | 12.304        | BB   | 0.3117      | 61.71142     | 2.88298      | 4.0360  |
| 2      | 14.659        | BB   | 0.4020      | 1467.31445   | 54.87431     | 95.9640 |

**(10*bR*,11*S*)-8-Methyl-11-phenyl-10*b*-(trifluoromethyl)-10*b*,11-dihydro-6*H*-isoindolo[2,1-*a*]indol-6-one (3*h*):**

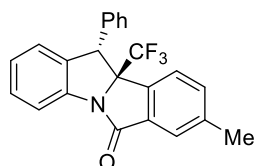

Purified by chromatography on silica gel, eluting with ethyl acetate/petroleum ether 1:80 (v/v); white solid (83% yield), m.p. 142-144 °C.  $[\alpha]_D^{20} = +48.8$  (c 0.5, CH<sub>2</sub>Cl<sub>2</sub>), 96% ee [Daicel Chiralpak OD-H column (25 cm × 0.46 cm ID), "hexane/*i*PrOH = 80/20, 0.6 mL/min, 280 nm;  $t_{\text{minor}} = 7.2$  min,  $t_{\text{major}} = 13.1$  min].

<sup>1</sup>H NMR (600 MHz, CDCl<sub>3</sub>) δ 7.83 (d,  $J = 7.9$  Hz, 1H), 7.56 (s, 1H), 7.41-7.38 (m, 1H), 7.14-7.08 (m, 3H), 7.03 (dd,  $J = 5.0, 2.0$  Hz, 3H), 6.94 (d,  $J = 7.9$  Hz, 1H), 6.65 (s, 2H), 4.95 (s, 1H), 2.31 (s, 3H). <sup>13</sup>C NMR (150 MHz, CDCl<sub>3</sub>) δ 170.2, 140.6, 140.3, 139.1, 137.4, 137.0, 133.8, 133.5, 128.8, 128.5, 127.7, 127.5, 125.8, 125.44, 125.38 (q,  $J = 282.0$  Hz), 124.9, 124.6, 116.5, 78.3 (q,  $J = 30.0$  Hz), 50.9, 21.3. <sup>19</sup>F NMR (377 MHz, CDCl<sub>3</sub>) δ -78.9 ppm. HRMS  $m/z$  (ESI<sup>+</sup>): Calcd for C<sub>23</sub>H<sub>16</sub>F<sub>3</sub>NONa<sup>+</sup> (M+Na)<sup>+</sup> 402.1076, found 402.1075.

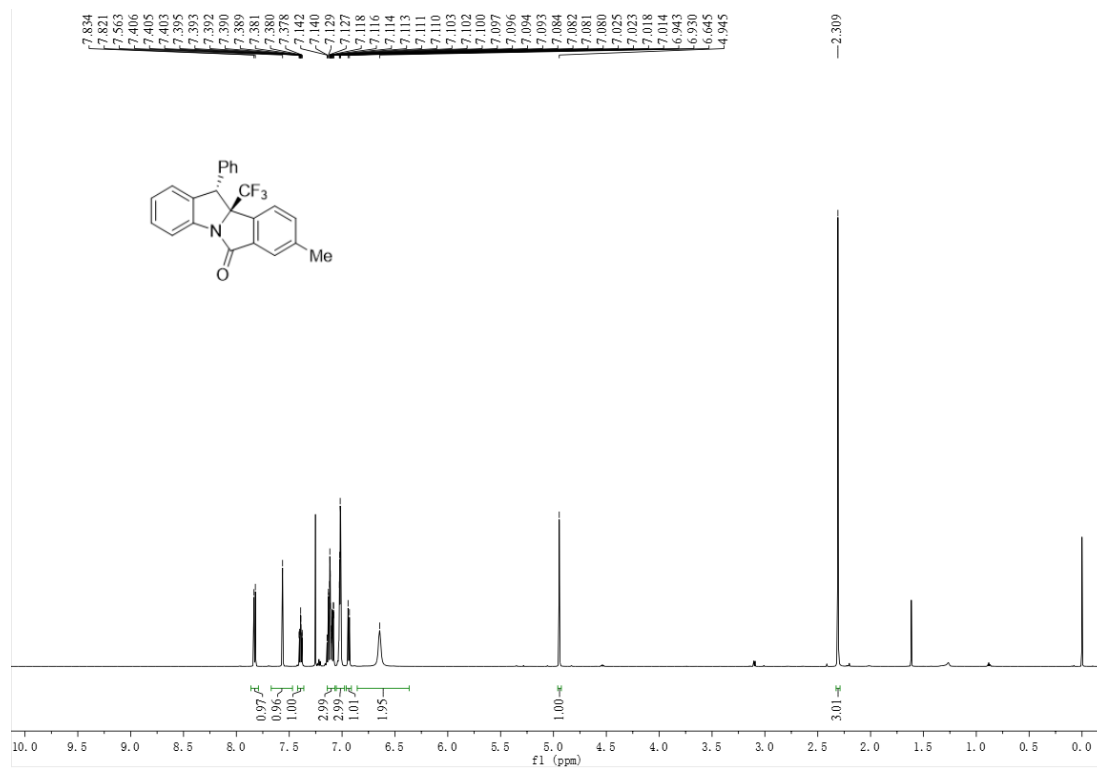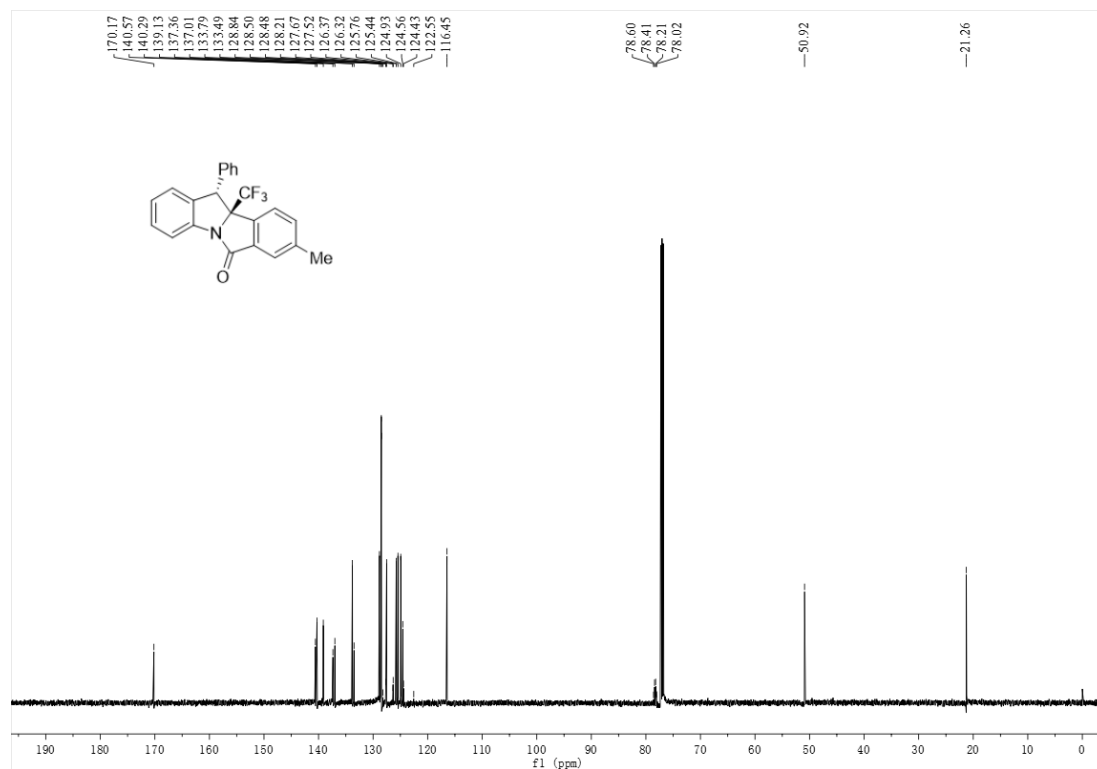

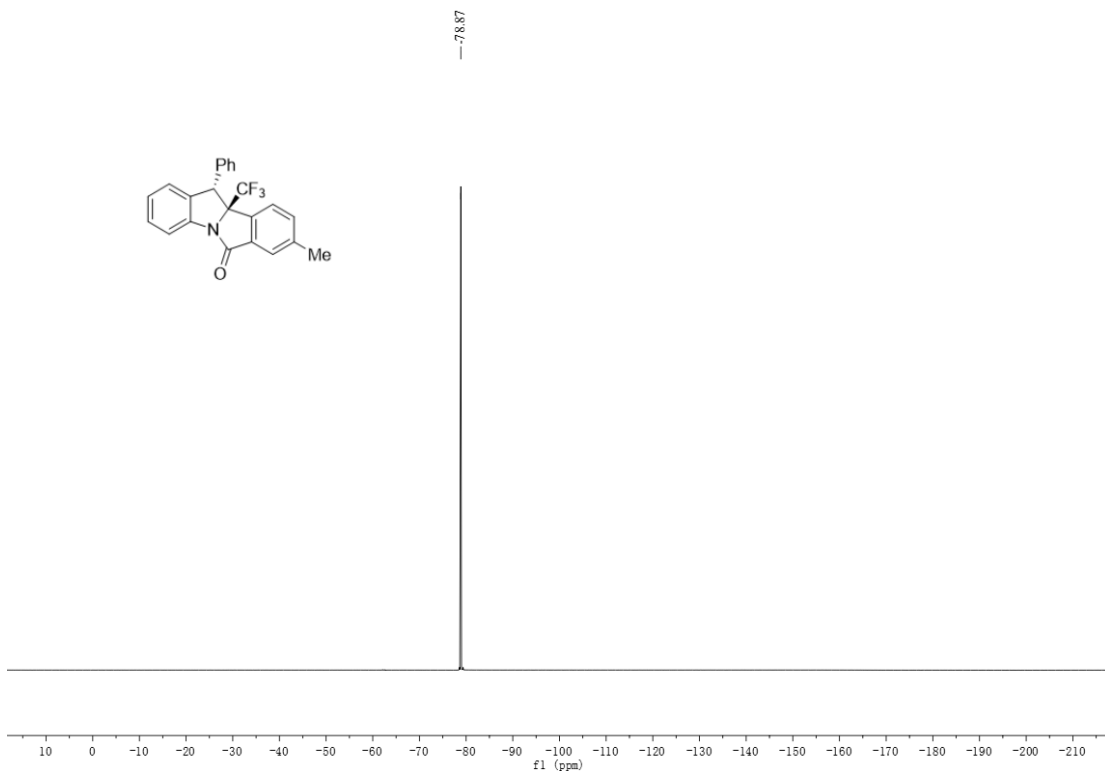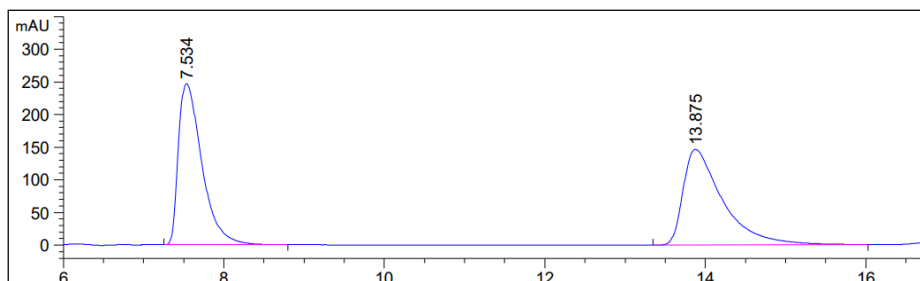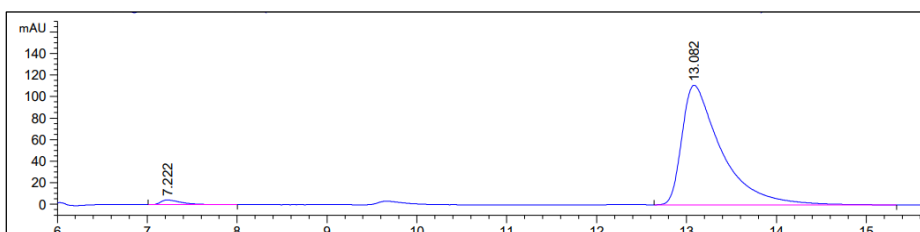

| Peak # | RetTime [min] | Type | Width [min] | Area [mAU*s] | Height [mAU] | Area %  |
|--------|---------------|------|-------------|--------------|--------------|---------|
| 1      | 7.222         | BB   | 0.2382      | 72.41095     | 4.44114      | 2.0983  |
| 2      | 13.082        | BB   | 0.4391      | 3378.59888   | 110.99972    | 97.9017 |

**(10*b*R,11*S*)-8-Phenyl-11-phenyl-10*b*-(trifluoromethyl)-10*b*,11-dihydro-6*H*-isoindolo[2,1-*a*]indol-6-one (**3i**):**

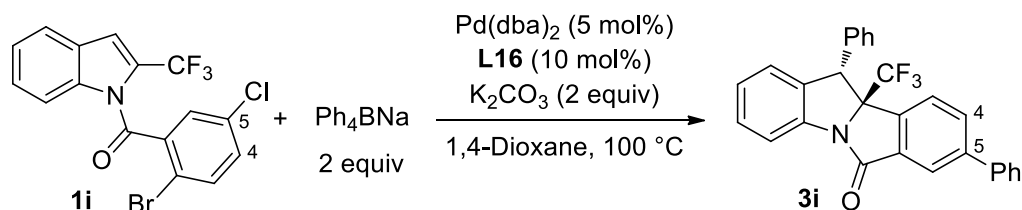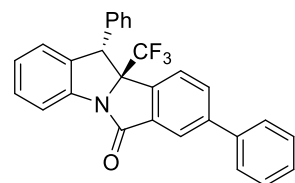

Purified by chromatography on silica gel, eluting with ethyl acetate/petroleum ether 1:80 (v/v); white solid (72% yield).  $[\alpha]_D^{20} = -89.6$  (c 0.5, CH<sub>2</sub>Cl<sub>2</sub>), 90% ee [Daicel Chiralpak C1 column (25 cm × 0.46 cm ID), "hexane/*i*PrOH = 90/10, 0.6 mL/min, 254 nm;  $t_{\text{minor}} = 7.9$  min,  $t_{\text{major}} = 10.8$  min]. <sup>1</sup>H NMR (600 MHz, CDCl<sub>3</sub>) δ 7.99 (d,  $J = 1.2$  Hz, 1H), 7.86 (d,  $J = 7.9$  Hz, 1H), 7.52 (dd,  $J = 8.1, 1.7$  Hz, 3H), 7.42 (t,  $J = 7.5$  Hz, 3H), 7.36 (t,  $J = 7.2$  Hz, 1H), 7.17-7.11 (m, 3H), 7.05-7.01 (m, 3H), 6.69 (s, 2H), 5.00 (s, 1H). <sup>13</sup>C NMR (150 MHz, CDCl<sub>3</sub>) δ 170.0, 143.2, 140.5, 139.1, 139.0, 138.8, 136.9, 134.1, 131.6, 129.0, 128.9, 128.6, 128.4, 128.2, 127.7, 127.1, 125.8, 125.6, 125.2, 125.4 (q,  $J = 282.0$  Hz), 122.9, 116.5, 78.2 (q,  $J = 30.0$  Hz), 51.0. <sup>19</sup>F NMR (377 MHz, CDCl<sub>3</sub>) δ -78.7 ppm. HRMS  $m/z$  (ESI<sup>+</sup>): Calcd for C<sub>28</sub>H<sub>18</sub>F<sub>3</sub>NONa<sup>+</sup> (M+Na)<sup>+</sup> 464.1233, found 464.1233.

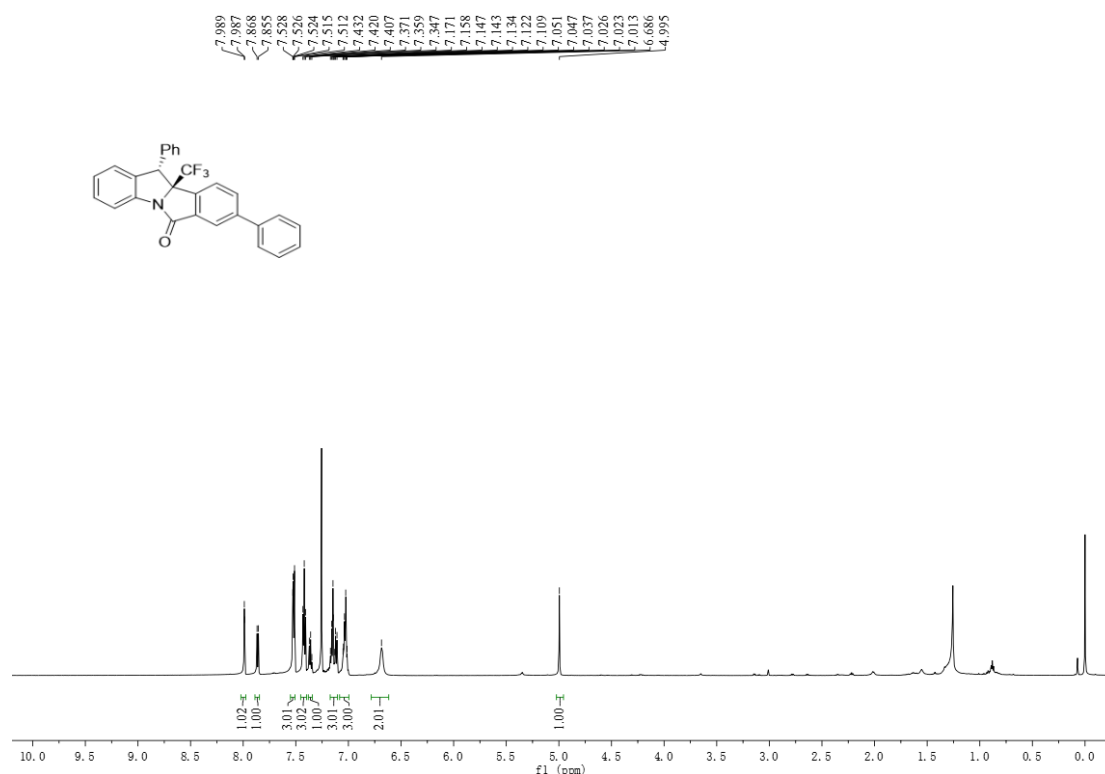

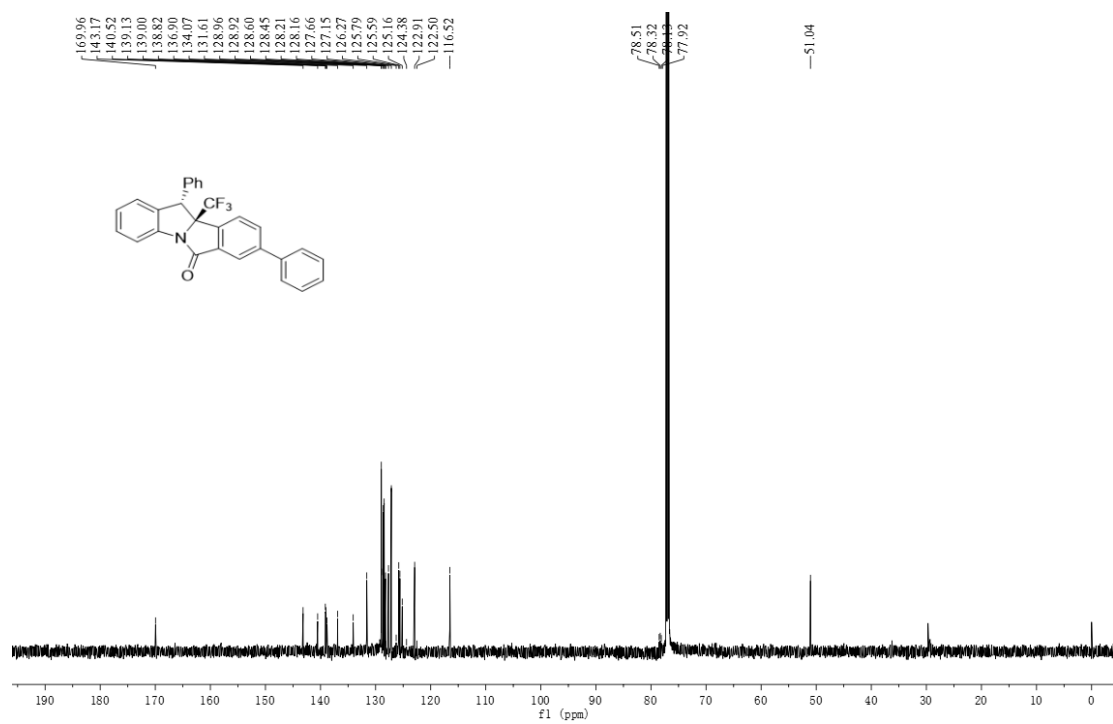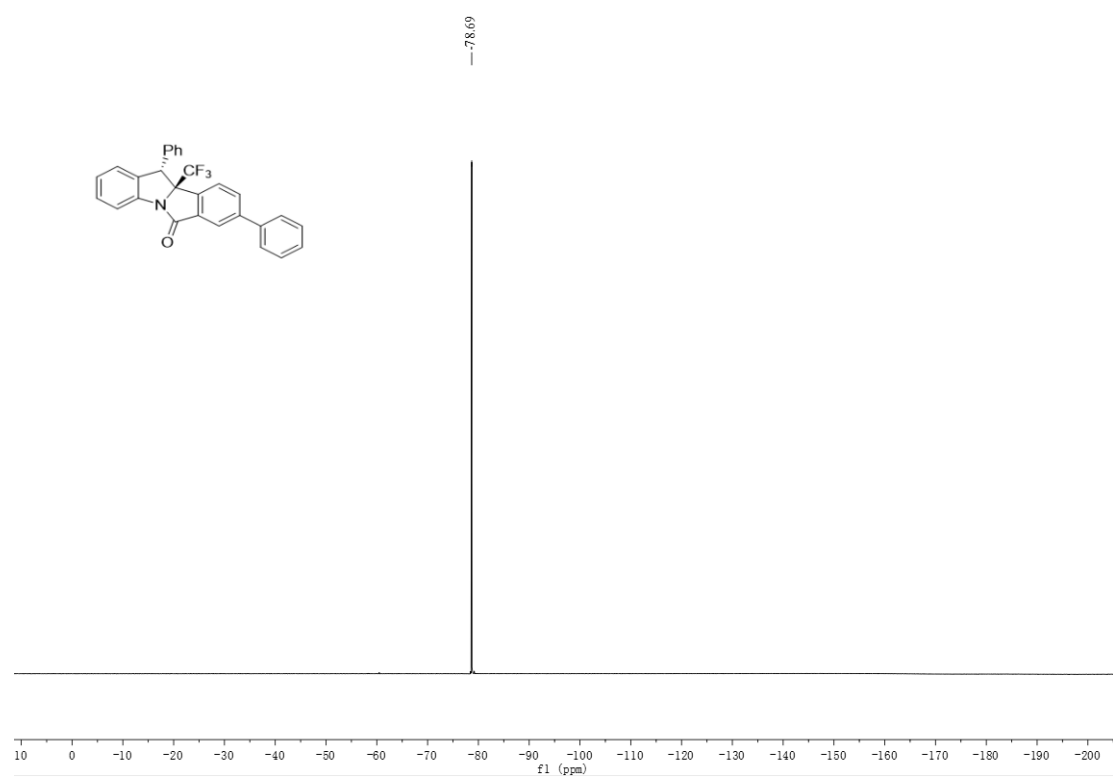

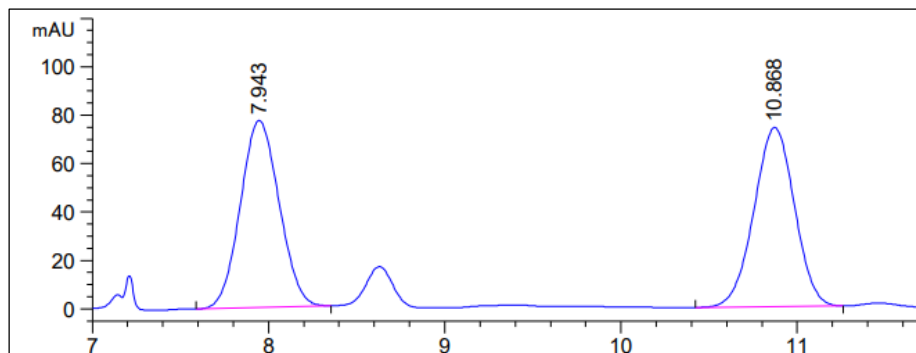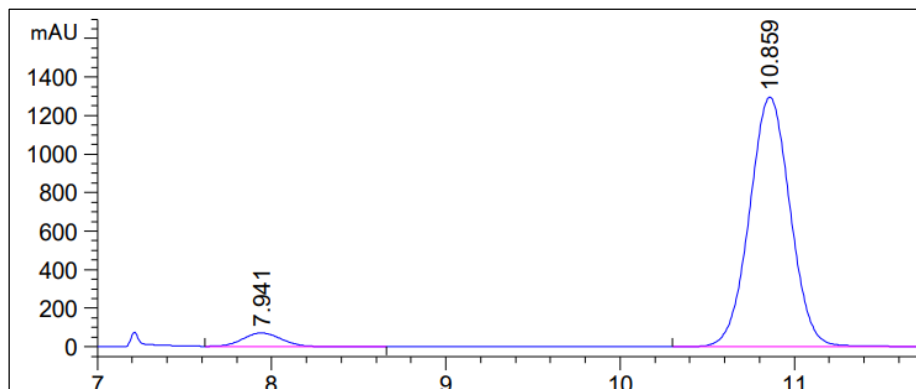

| Peak # | RetTime [min] | Type | Width [min] | Area [mAU*s] | Height [mAU] | Area %  |
|--------|---------------|------|-------------|--------------|--------------|---------|
| 1      | 7.941         | VB   | 0.2428      | 1116.70337   | 71.28969     | 5.0472  |
| 2      | 10.859        | BB   | 0.2512      | 2.10084e4    | 1295.15869   | 94.9528 |

**(10*b*R,11*S*)-11-(Benzo[*d*] [1,3]dioxo-5-yl)-10*b*-(trifluoromethyl)-10*b*,11-dihydro-6*H*-isoindolo[2,1-*a*]Indole-6-one (3j):**

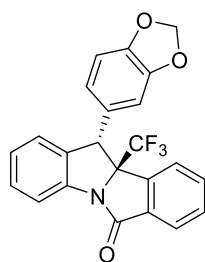

Purified by chromatography on silica gel, eluting with ethyl acetate/petroleum ether 1:80 (v/v); white solid (57% yield).  $[\alpha]_D^{20} = +21.9$  (c 0.5,  $\text{CH}_2\text{Cl}_2$ ), 80% ee [Daicel Chiralpak AS column (25 cm  $\times$  0.46 cm ID),  $^n$ hexane/*i*PrOH = 90/10, 0.6 mL/min, 280 nm;  $t_{\text{minor}} = 10.9$  min,  $t_{\text{major}} = 12.2$  min].  $^1\text{H}$  NMR (600 MHz,  $\text{CDCl}_3$ )  $\delta$  7.82 (d,  $J = 7.9$  Hz, 1H), 7.79 (d,  $J = 7.2$  Hz, 1H), 7.43-7.36 (m, 3H), 7.16-7.11 (m, 3H), 6.49 (d,  $J = 8.4$  Hz, 1H), 6.23 (s, 1H), 6.01 (s, 1H), 5.76 (dd,  $J = 13.7, 1.5$  Hz, 2H), 4.90 (s, 1H).  $^{13}\text{C}$  NMR (150 MHz,  $\text{CDCl}_3$ )  $\delta$  170.0, 147.8, 146.9, 140.3, 140.1, 136.9, 133.4, 132.9, 132.9, 130.0, 128.9, 125.7, 125.5, 125.4 (q,  $J = 282.0$  Hz), 124.9, 124.8, 122.0, 116.5, 108.7, 108.1, 101.0, 78.4 (q,  $J = 30.0$  Hz), 50.7.  $^{19}\text{F}$  NMR (377 MHz,  $\text{CDCl}_3$ )  $\delta$  -78.8 ppm. HRMS  $m/z$  (ESI $^+$ ): calcd for  $\text{C}_{23}\text{H}_{14}\text{F}_3\text{NO}_3\text{Na}^+$  ( $\text{M}+\text{Na}$ ) $^+$  432.0818, found 432.0818.

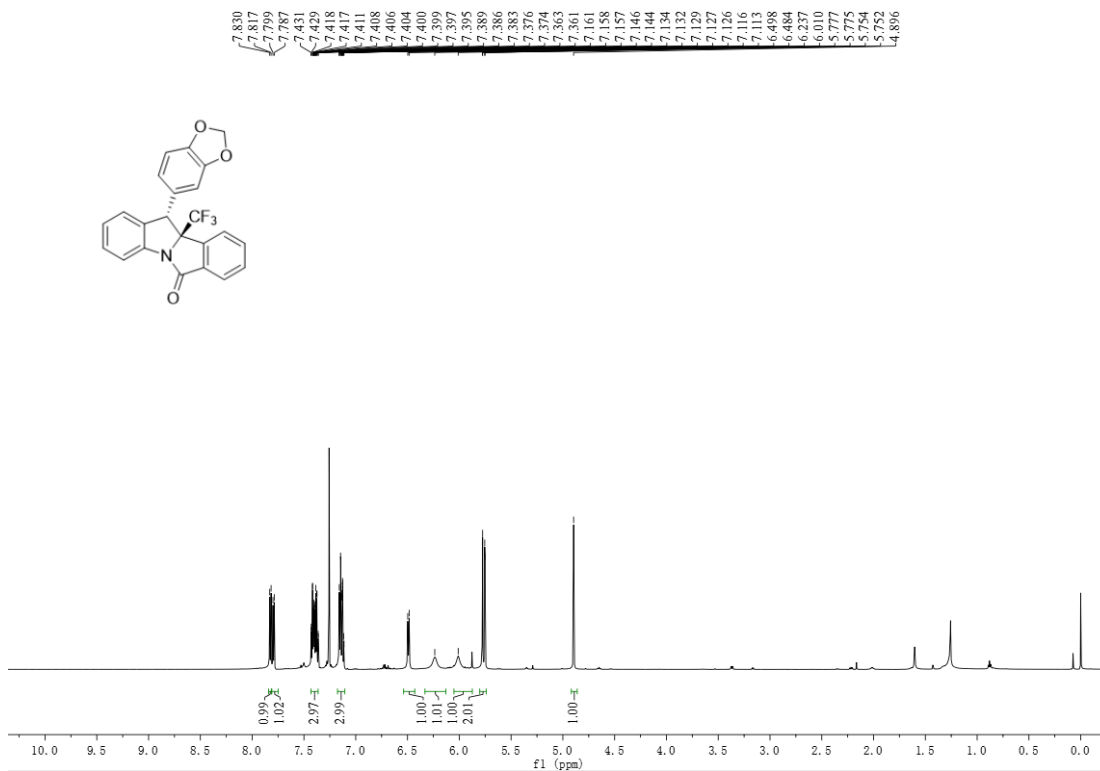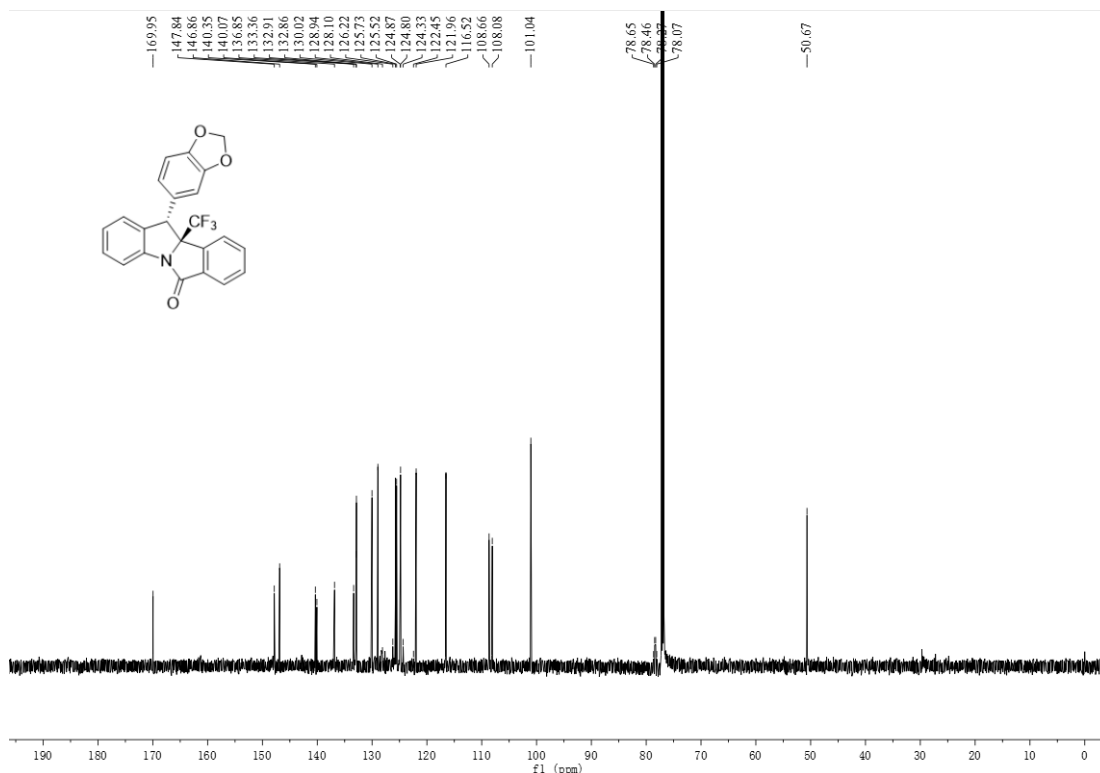



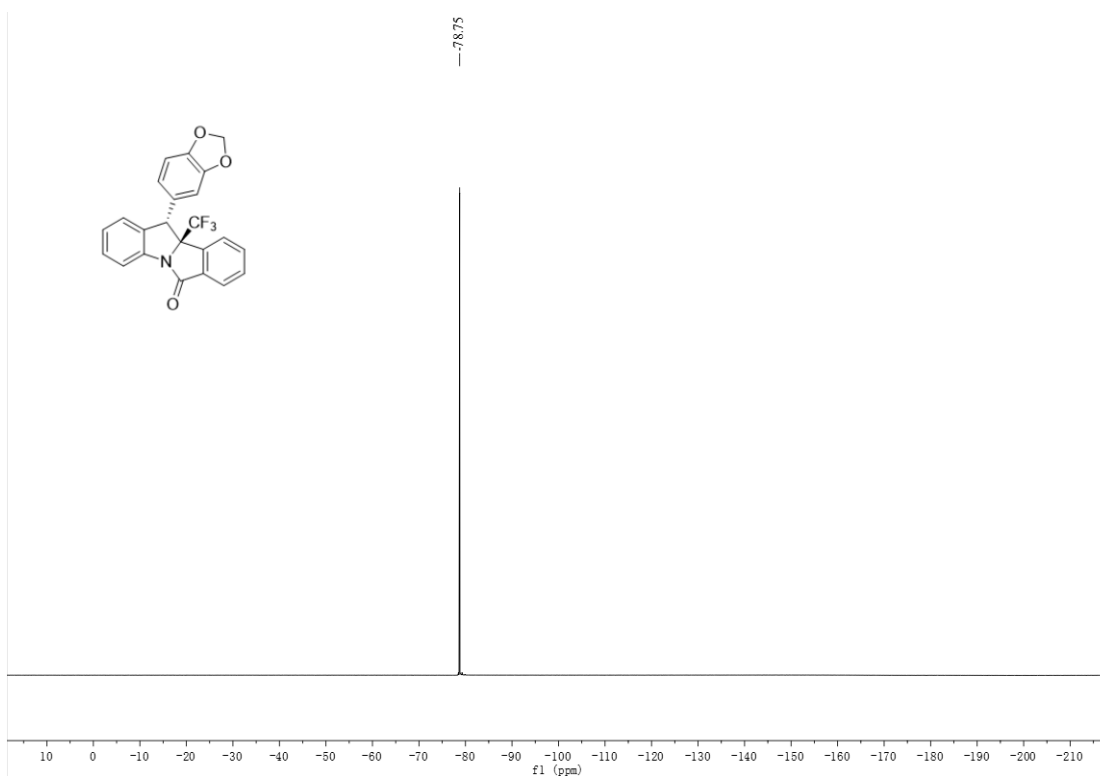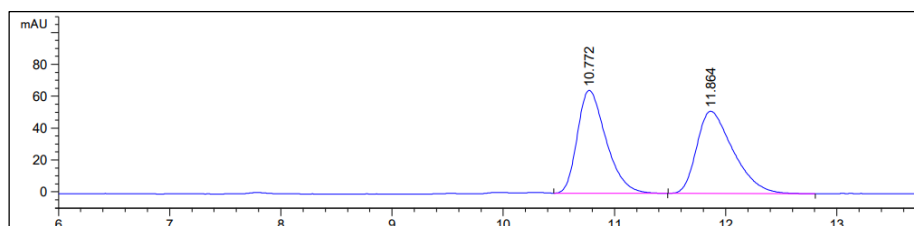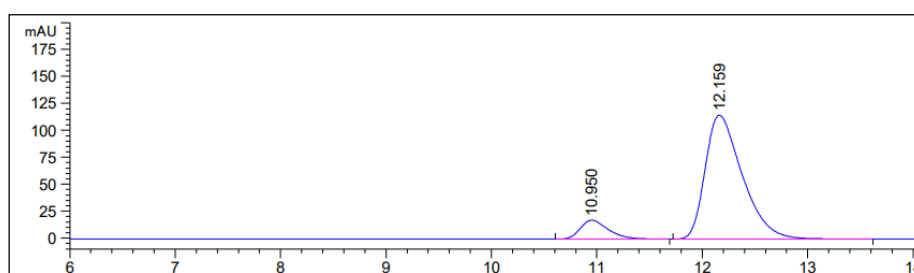

| Peak # | RetTime [min] | Type | Width [min] | Area [mAU*s] | Height [mAU] | Area %  |
|--------|---------------|------|-------------|--------------|--------------|---------|
| 1      | 10.950        | BB   | 0.2862      | 323.06879    | 17.43327     | 10.2962 |
| 2      | 12.159        | BB   | 0.3674      | 2814.68701   | 115.04078    | 89.7038 |

**(10*b*R,11*S*)-11-(3-Methoxyphenyl)-10*b*-(trifluoromethyl)-10*b*,11-dihydro-6*H*-isoindolo[2,1-*a*]indol-6-one (3*k*):**

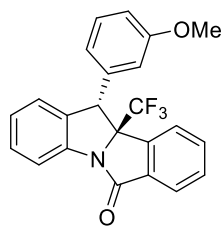

Purified by chromatography on silica gel, eluting with ethyl acetate/petroleum ether 1:80 (v/v); colorless liquid (90% yield).  $[\alpha]_D^{20} = +62.2$  (c 0.5,  $\text{CH}_2\text{Cl}_2$ ), 79% ee [Daicel Chiralpak A2 column (25 cm  $\times$  0.46 cm ID),  $^n$ hexane/*i*PrOH = 95/05, 0.6 mL/min, 210 nm;  $t_{\text{minor}} = 17.5$  min,  $t_{\text{major}} = 27.9$  min].  $^1\text{H}$  NMR (400 MHz,  $\text{CDCl}_3$ )  $\delta$  7.84 (d,  $J = 7.9$  Hz, 1H), 7.68 (d,  $J = 7.8$  Hz, 1H), 7.42-7.36 (m, 2H), 7.31 (td,  $J = 7.5, 1.3$  Hz, 1H), 7.14-7.11 (m, 3H), 6.92 (t,  $J = 7.9$  Hz, 1H), 6.54 (ddd,  $J = 8.3, 2.6, 0.9$  Hz, 1H), 6.21 (d,  $J = 29.7$  Hz, 2H), 4.93 (s, 1H), 3.52 (s, 3H).  $^{13}\text{C}$  NMR (100 MHz,  $\text{CDCl}_3$ )  $\delta$  170.0, 159.6, 140.5, 140.4, 140.1, 136.8, 133.3, 132.8, 130.0, 129.6, 128.9, 125.8, 125.6, 125.4 (q,  $J = 282.0$  Hz), 124.9, 124.6, 120.8, 116.5, 114.1, 113.0, 78.5 (q,  $J = 30.0$  Hz), 55.1, 50.9.  $^{19}\text{F}$  NMR (377 MHz,  $\text{CDCl}_3$ )  $\delta$  -78.7 ppm. HRMS  $m/z$  (ESI+): Calcd for  $\text{C}_{23}\text{H}_{16}\text{F}_3\text{NO}_2\text{Na}^+$  ( $\text{M}+\text{Na}$ ) $^+$  418.1025, found 418.1025.

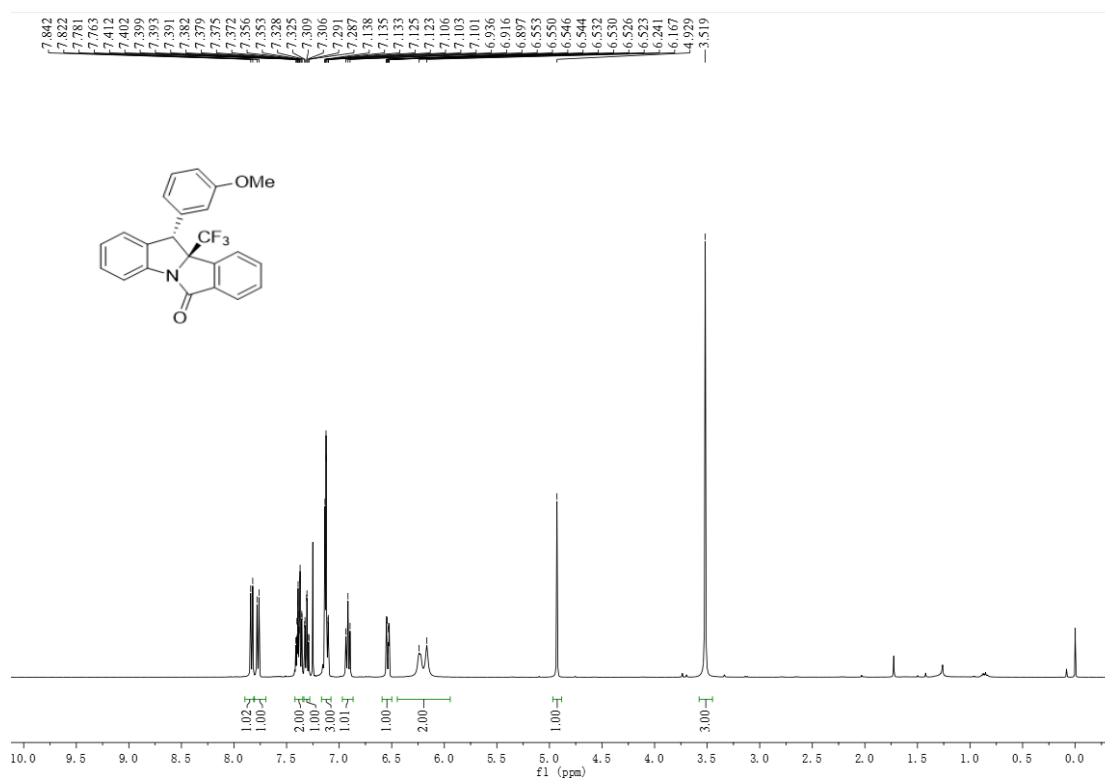

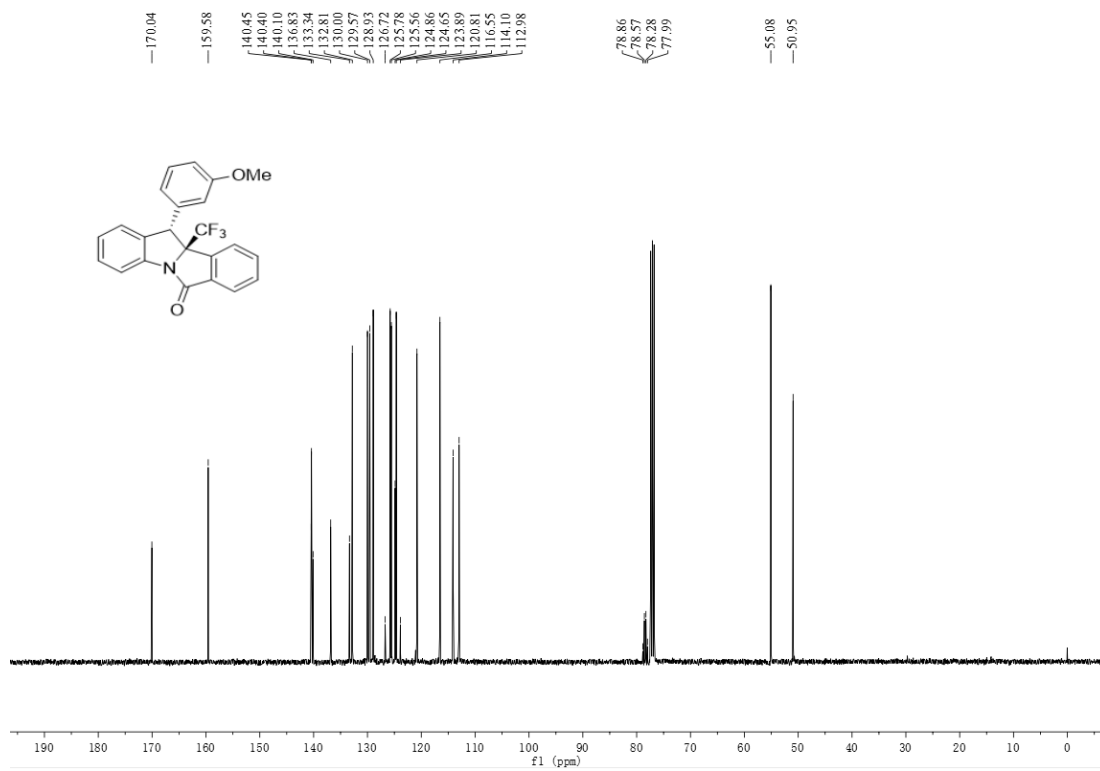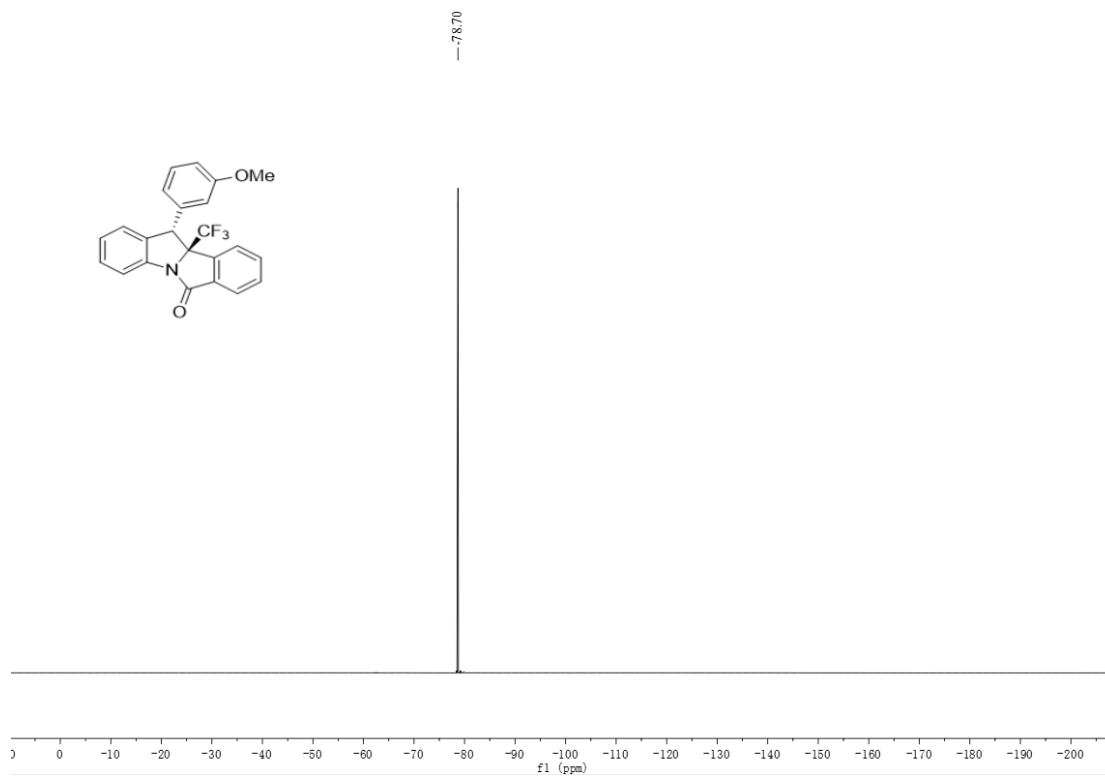

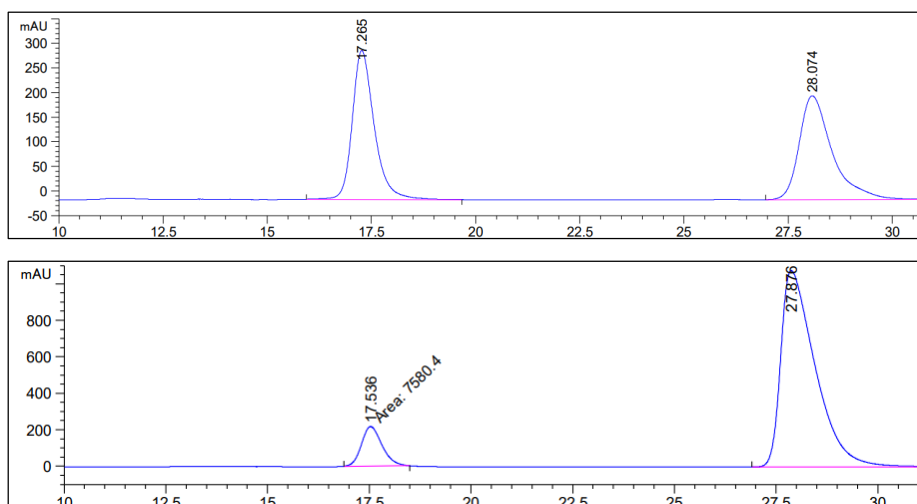

| Peak # | RetTime [min] | Type | Width [min] | Area [mAU*s] | Height [mAU] | Area %  |
|--------|---------------|------|-------------|--------------|--------------|---------|
| 1      | 17.536        | MM   | 0.5825      | 7580.40430   | 216.87651    | 10.6503 |
| 2      | 27.876        | BB   | 0.8585      | 6.35949e4    | 1077.64136   | 89.3497 |

**(10*bR*,11*S*)-11-(3-Methylphenyl)-10*b*-(trifluoromethyl)-10*b*,11-dihydro-6*H*-isoindolo[2,1-*a*]indol-6-one (3l):**

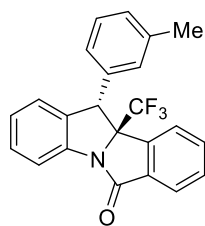

Purified by chromatography on silica gel, eluting with ethyl acetate/petroleum ether 1:80 (v/v); white solid (86% yield), m.p. 188-190 °C.  $[\alpha]_D^{20} = +79.9$  (c 0.5, CH<sub>2</sub>Cl<sub>2</sub>), 87% ee [Daicel Chiralpak A2 column (25 cm × 0.46 cm ID), "hexane/iPrOH = 90/10, 0.6 mL/min, 280 nm;  $t_{\text{minor}} = 11.3$  min,  $t_{\text{major}} = 16.7$  min]. <sup>1</sup>H NMR (400 MHz, CDCl<sub>3</sub>)  $\delta$  7.84 (d,  $J = 7.9$  Hz, 1H), 7.68 (d,  $J = 7.8$  Hz, 1H), 7.42-7.35 (m, 2H), 7.30 (t,  $J = 7.8$  Hz, 1H), 7.14 (d,  $J = 6.3$  Hz, 2H), 7.07 (d,  $J = 7.6$  Hz, 1H), 6.68 (t,  $J = 7.5$  Hz, 1H), 6.82 (d,  $J = 7.5$  Hz, 1H), 6.44 (d,  $J = 32.4$  Hz, 2H), 4.93 (s, 1H), 2.09 (s, 3H). <sup>13</sup>C NMR (100 MHz, CDCl<sub>3</sub>)  $\delta$  170.1, 140.5, 140.2, 138.9, 138.2, 137.0, 133.3, 132.7, 129.9, 129.1, 128.8, 128.4, 128.3, 125.8, 125.5, 125.4 (q,  $J = 282.0$  Hz), 124.9, 124.6, 116.5, 78.5 (q,  $J = 30.0$  Hz), 51.0, 21.2. <sup>19</sup>F NMR (377 MHz, CDCl<sub>3</sub>)  $\delta$  -78.7 ppm. HRMS  $m/z$  (ESI<sup>+</sup>): Calcd for C<sub>23</sub>H<sub>16</sub>F<sub>3</sub>NONa<sup>+</sup> (M+Na)<sup>+</sup> 402.1076, found 402.1076.

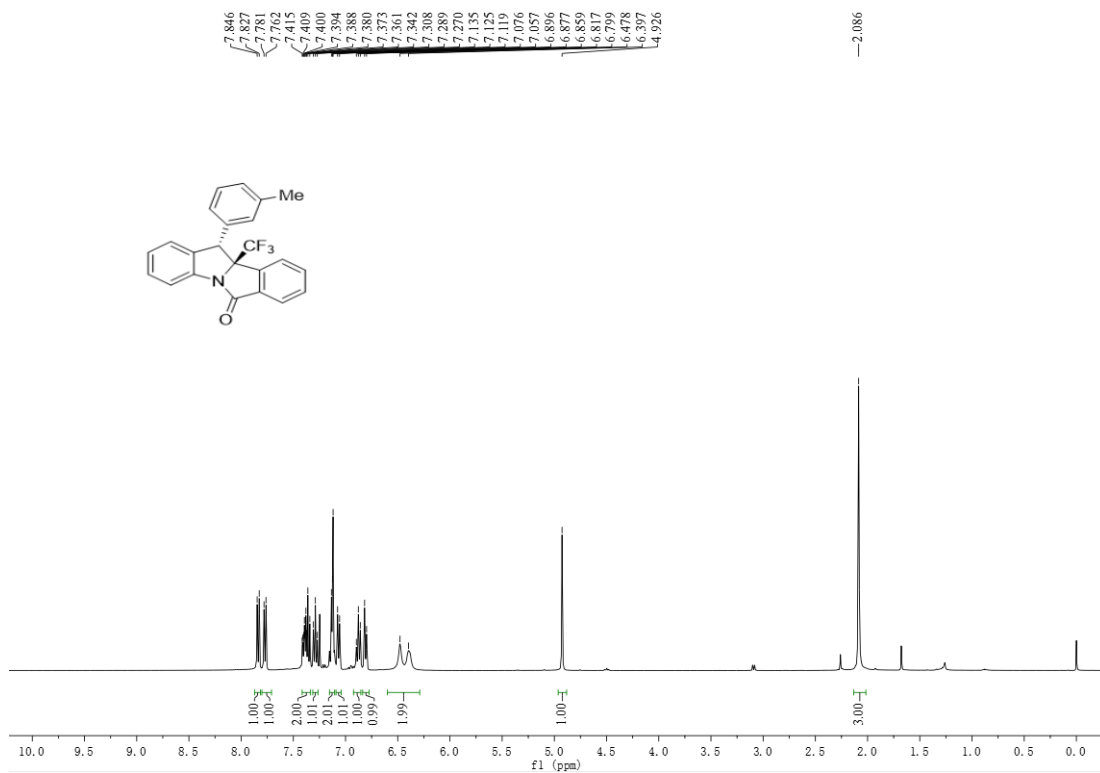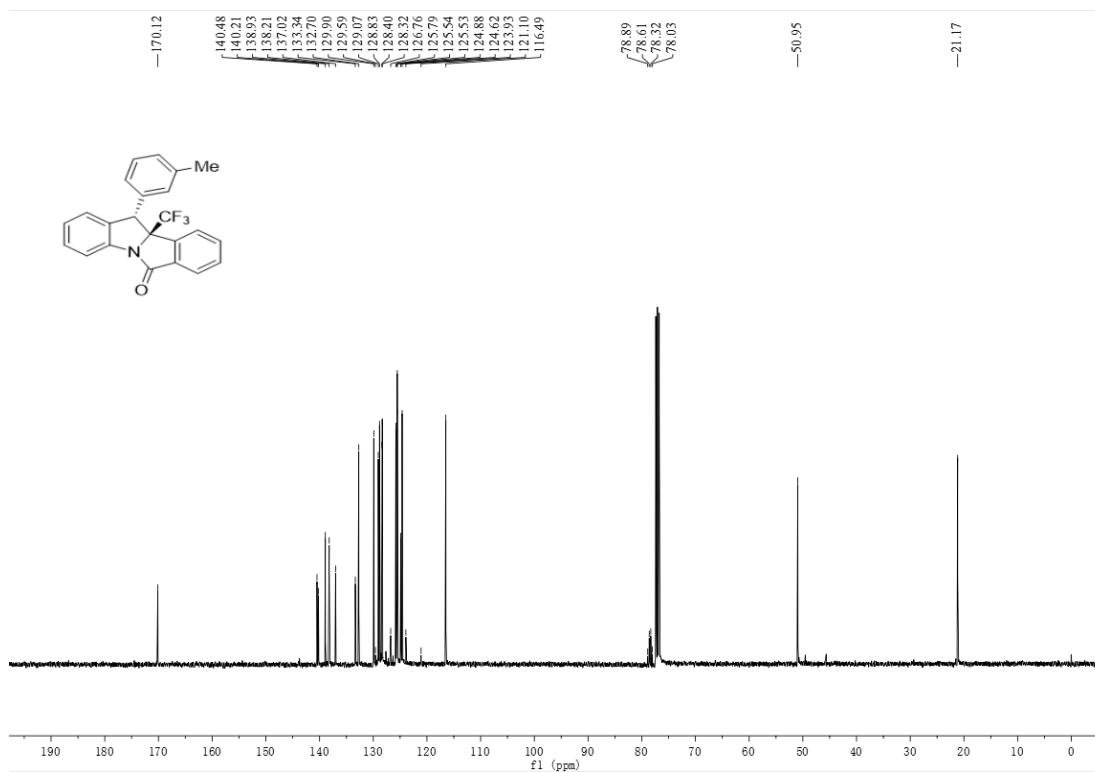

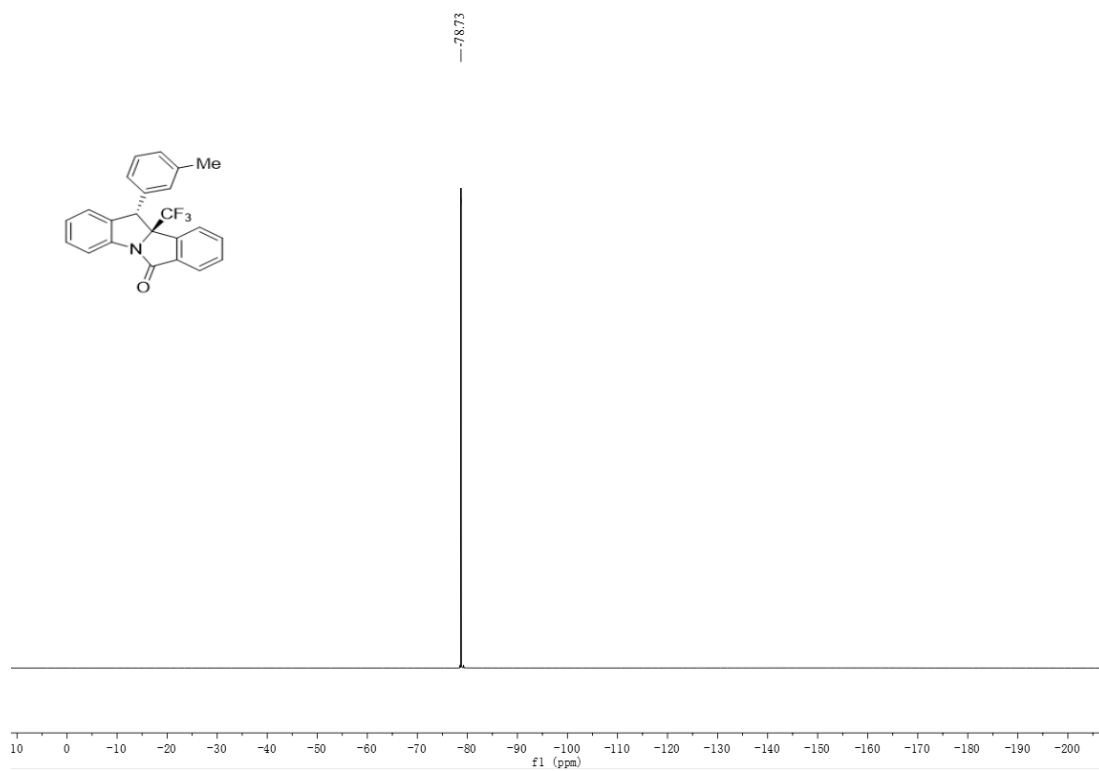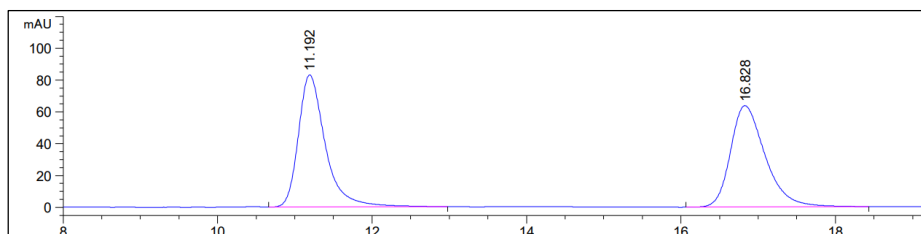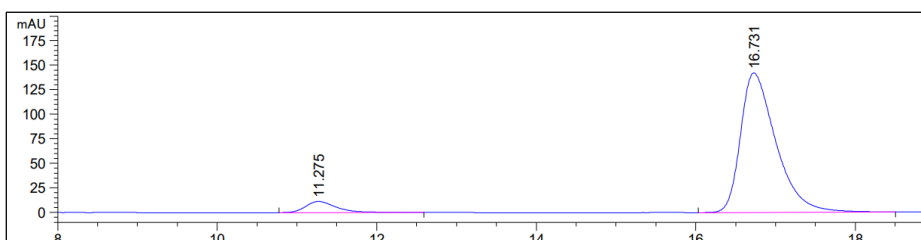

| Peak # | RetTime [min] | Type | Width [min] | Area [mAU*s] | Height [mAU] | Area %  |
|--------|---------------|------|-------------|--------------|--------------|---------|
| 1      | 11.275        | BB   | 0.4046      | 306.05478    | 11.35109     | 6.5259  |
| 2      | 16.731        | BB   | 0.4681      | 4383.76611   | 142.04189    | 93.4741 |

**(10*b*R,11*S*)-11-(4-Methoxyphenyl)-10*b*-(trifluoromethyl)-10*b*,11-dihydro-6*H*-isoindolo[2,1-*a*]indol-6-one (3*m*):**

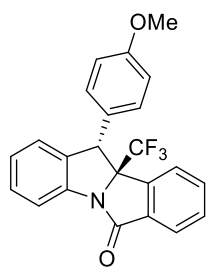

Purified by chromatography on silica gel, eluting with ethyl acetate/petroleum ether 1:80 (v/v); colorless liquid (82% yield).  $[\alpha]_D^{20} = +119.1$  (c 0.5,  $\text{CH}_2\text{Cl}_2$ ), 89% ee [Daicel Chiralpak A2 column (25 cm  $\times$  0.46 cm ID),  $n$ -hexane/*i*-PrOH = 80/20, 0.6 mL/min, 280 nm;  $t_{\text{minor}} = 10.5$  min,  $t_{\text{major}} = 17.0$  min].  $^1\text{H}$  NMR (400 MHz,  $\text{CDCl}_3$ )  $\delta$  7.83 (d,  $J = 7.9$  Hz, 1H), 7.77 (d,  $J = 7.8$  Hz, 1H), 7.38 (q,  $J = 6.9$  Hz, 2H), 7.32 (t,  $J = 7.8$  Hz, 1H), 7.15-7.08 (m, 3H), 6.55 (s, 4H), 4.94 (s, 1H), 3.62 (s, 3H).  $^{13}\text{C}$  NMR (100 MHz,  $\text{CDCl}_3$ )  $\delta$  170.1, 158.8, 140.3, 140.2, 137.3, 133.3, 132.9, 131.3, 129.9, 129.5, 128.8, 125.7, 125.5, 125.4 (q,  $J = 282.0$  Hz), 125.0, 124.7, 116.5, 113.8, 78.5 (q,  $J = 30.0$  Hz), 55.1, 50.3.  $^{19}\text{F}$  NMR (377 MHz,  $\text{CDCl}_3$ )  $\delta$  -78.7 ppm. HRMS  $m/z$  (ESI $^+$ ): Calcd for  $\text{C}_{23}\text{H}_{16}\text{F}_3\text{NO}_2\text{Na}^+$  ( $\text{M}+\text{Na}$ ) $^+$  418.1025, found 418.1023.

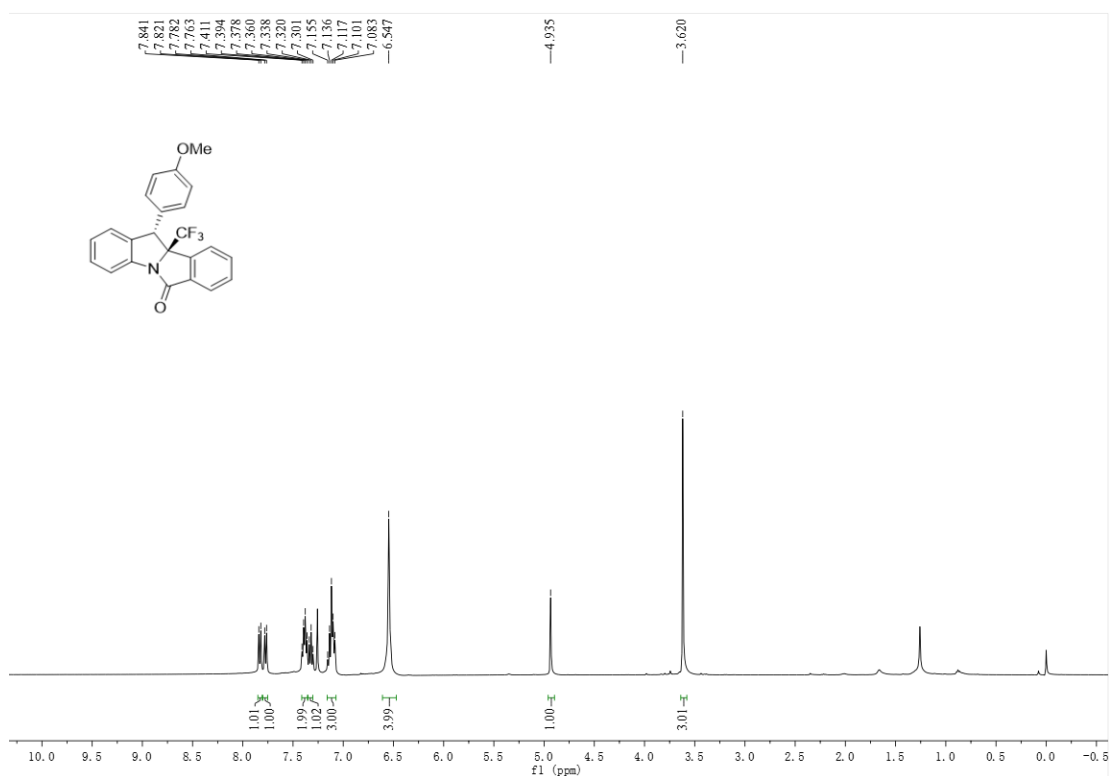

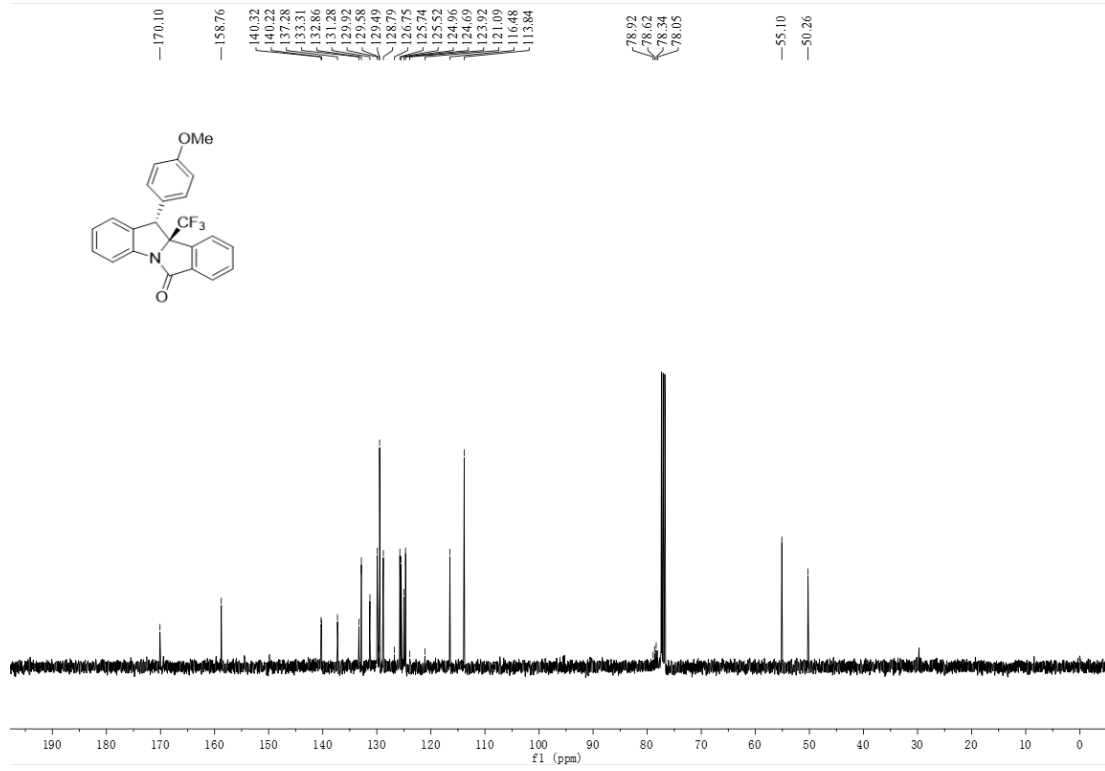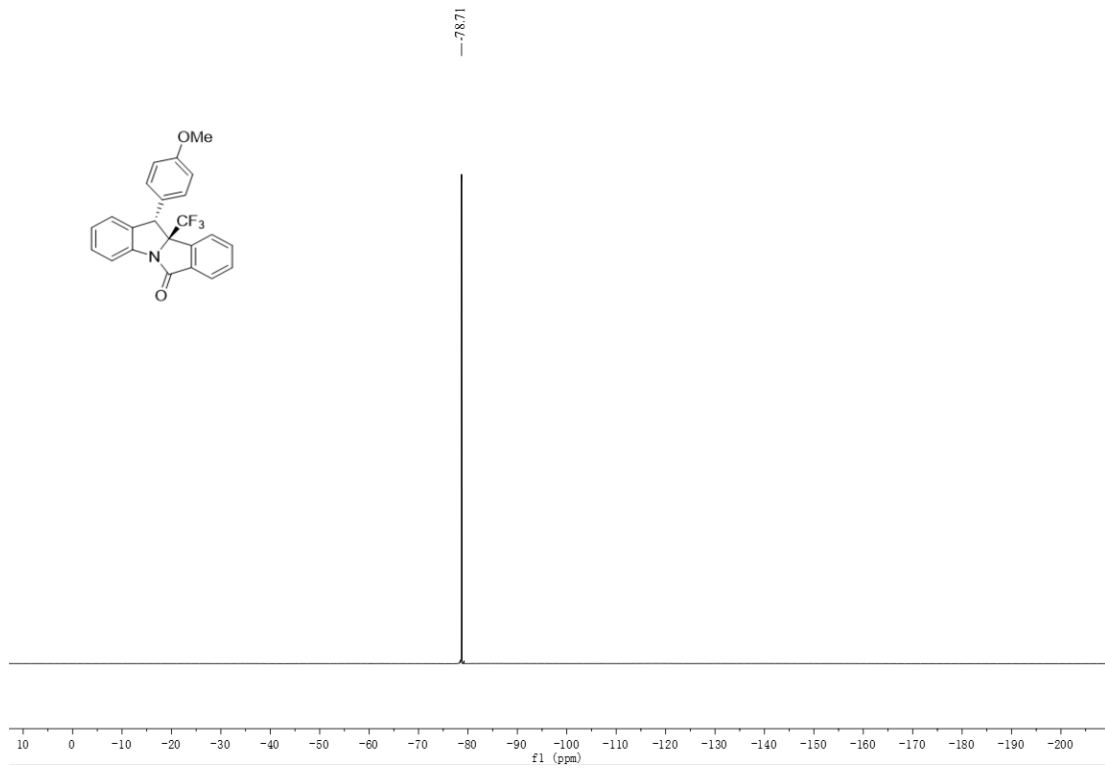



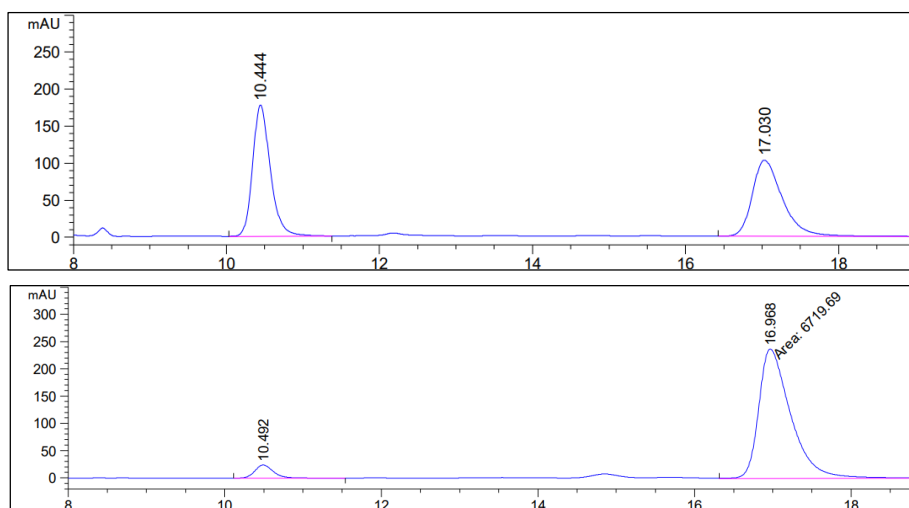

| Peak # | RetTime [min] | Type | Width [min] | Area [mAU*s] | Height [mAU] | Area %  |
|--------|---------------|------|-------------|--------------|--------------|---------|
| 1      | 10.492        | BB   | 0.2501      | 396.75803    | 24.09507     | 5.5752  |
| 2      | 16.968        | MM   | 0.4720      | 6719.68506   | 237.28894    | 94.4248 |

**(10*bR*,11*S*)-11-(4-Ethylphenyl)-10*b*-(trifluoromethyl)-10*b*,11-dihydro-6*H*-isoindolo[2,1-*a*]indol-6-one (3*n*):**

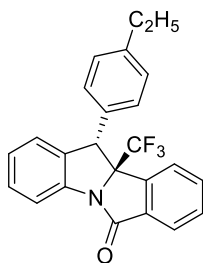

Purified by chromatography on silica gel, eluting with ethyl acetate/petroleum ether 1:80 (v/v); white solid (79% yield).  $[\alpha]_D^{20} = +27.8$  (c 0.5,  $\text{CH}_2\text{Cl}_2$ ), 91% ee [Daicel Chiralpak A2 column (25 cm  $\times$  0.46 cm ID),  $n$ hexane/*i*PrOH = 90/10, 0.6 mL/min, 280 nm;  $t_{\text{minor}} = 9.9$  min,  $t_{\text{major}} = 15.0$  min].  $^1\text{H}$  NMR (600 MHz,  $\text{CDCl}_3$ )  $\delta$  7.83 (d,  $J = 7.9$  Hz, 1H), 7.76 (d,  $J = 7.8$  Hz, 1H), 7.36 (dt,  $J = 20.9, 6.6$  Hz, 2H), 7.26 (dd,  $J = 15.3, 7.8$  Hz, 1H), 7.14-7.10 (m, 2H), 7.06 (d,  $J = 7.8$  Hz, 1H), 6.82 (d,  $J = 8.4$  Hz, 2H), 6.54 (d,  $J = 7.7$  Hz, 2H), 4.94 (s, 1H), 2.41 (q,  $J = 7.6$  Hz, 2H), 1.03 (t,  $J = 7.6$  Hz, 3H).  $^{13}\text{C}$  NMR (150 MHz,  $\text{CDCl}_3$ )  $\delta$  170.1, 143.7, 140.5, 140.3, 137.2, 136.3, 133.3, 132.7, 129.8, 128.8, 128.3, 127.9, 125.8, 125.5, 125.4 (q,  $J = 282.0$  Hz), 125.0, 124.6, 116.5, 78.5 (q,  $J = 30.0$  Hz), 50.7, 28.3, 15.3.  $^{19}\text{F}$  NMR (377 MHz,  $\text{CDCl}_3$ )  $\delta$  -78.7 ppm. HRMS  $m/z$  (ESI $^+$ ): Calcd for  $\text{C}_{24}\text{H}_{18}\text{F}_3\text{NONa}^+$  (M+Na) $^+$  416.1233, found 416.1232.

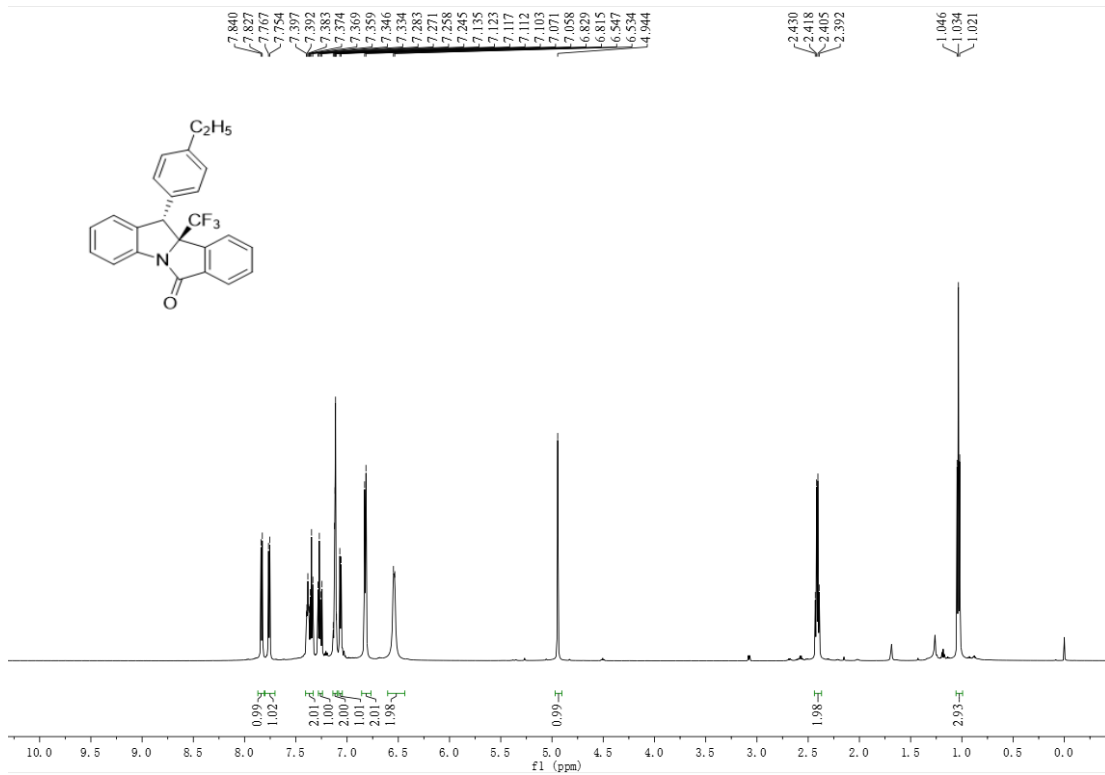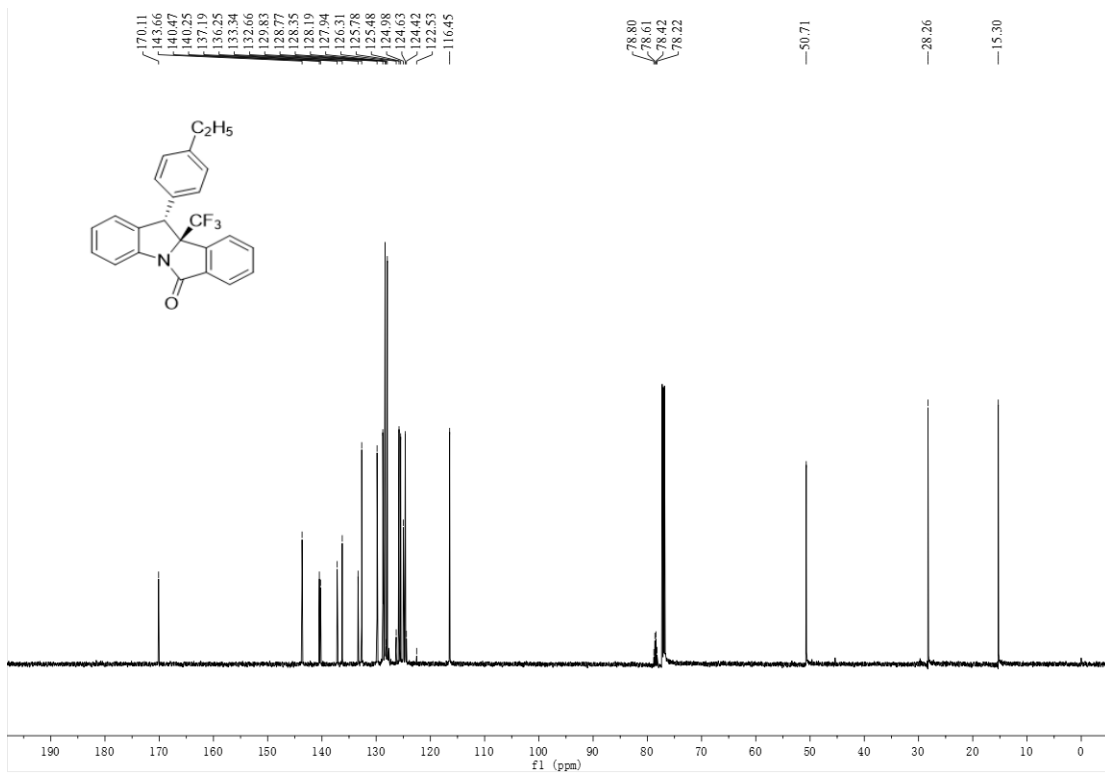

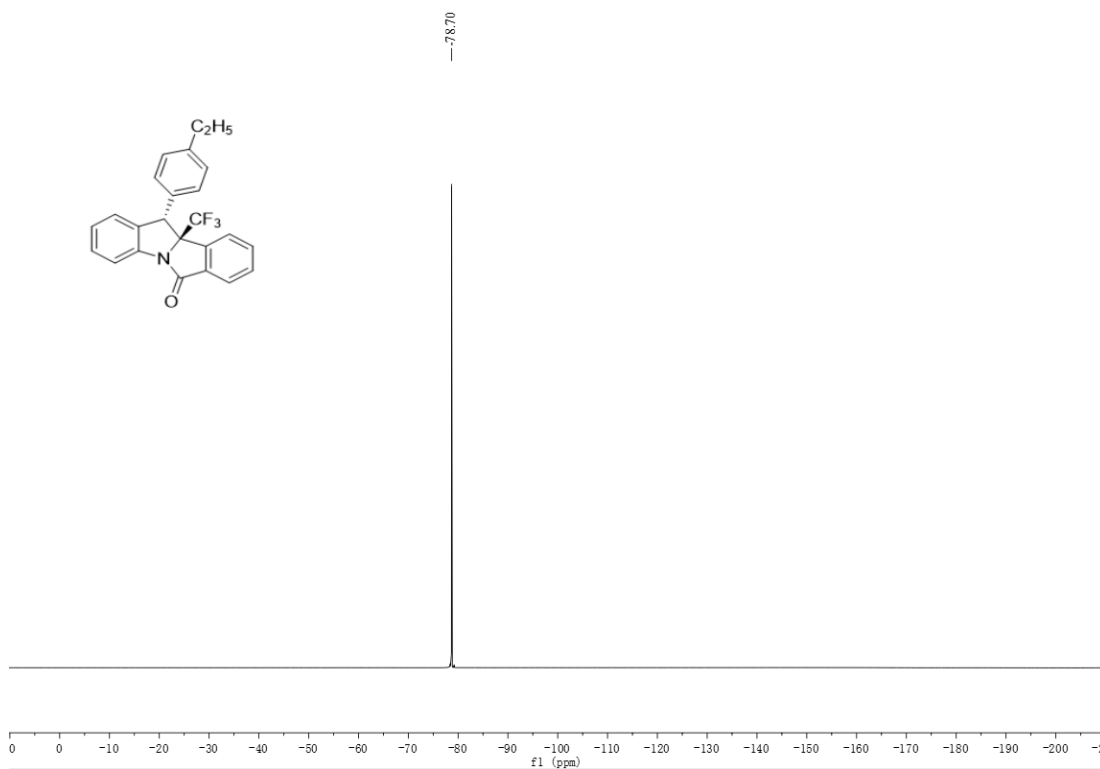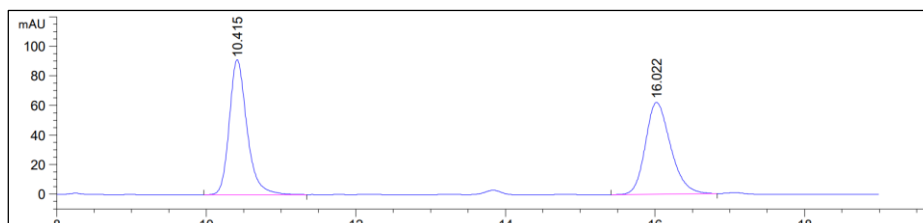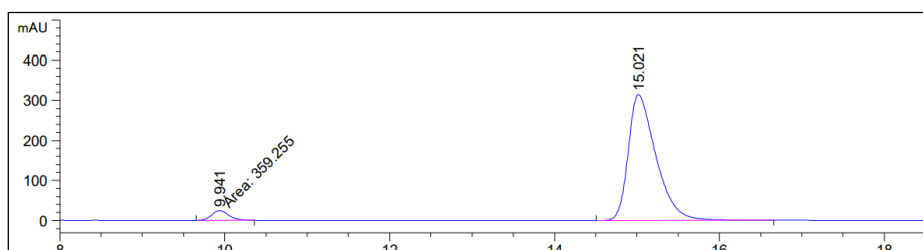

| Peak # | RetTime [min] | Type | Width [min] | Area [mAU*s] | Height [mAU] | Area %  |
|--------|---------------|------|-------------|--------------|--------------|---------|
| 1      | 9.941         | MM   | 0.2430      | 359.25497    | 24.63819     | 4.6568  |
| 2      | 15.021        | BB   | 0.3509      | 7355.41992   | 314.46463    | 95.3432 |

**(10*b*R,11*S*)-11-([1,1'-Biphenyl]-4-yl)-10*b*-(trifluoromethyl)-10*b*,11-dihydro-6*H*-isoindolo[2,1-*a*]indole *Dol*-6-one (**3o**):**

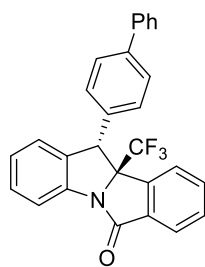

Purified by chromatography on silica gel, eluting with ethyl acetate/petroleum ether 1:80 (v/v); colorless liquid (51% yield).  $[\alpha]_D^{20} = +20.8$  (c 0.5, CH<sub>2</sub>Cl<sub>2</sub>), 93% ee [Daicel Chiralpak A2 column (25 cm × 0.46 cm ID), <sup>n</sup>hexane/<sup>i</sup>PrOH = 90/10, 0.6 mL/min, 254 nm;  $t_{\text{minor}} = 15.7$  min,  $t_{\text{major}} = 31.5$  min]. <sup>1</sup>H NMR (400 MHz, CDCl<sub>3</sub>) δ 7.86 (d, *J* = 7.9 Hz, 1H), 7.78 (d, *J* = 7.8 Hz, 1H), 7.43-7.33 (m, 6H), 7.35-7.23 (m, 4H), 7.16 (d, *J* = 4.2 Hz, 2H), 7.12 (d, *J* = 7.8 Hz, 1H), 6.71 (d, *J* = 7.2 Hz, 2H), 5.02 (s, 1H). <sup>13</sup>C NMR (101 MHz, CDCl<sub>3</sub>) δ 170.1, 140.5, 140.3, 140.08, 140.06, 138.0, 136.9, 133.3, 132.9, 130.0, 129.0, 128.9, 128.8, 127.5, 127.1, 126.8, 125.8, 125.6, 125.4 (q, *J* = 282.0 Hz), 125.0, 124.8, 116.6, 78.5 (q, *J* = 30.0 Hz), 50.7. <sup>19</sup>F NMR (377 MHz, CDCl<sub>3</sub>) δ -78.7 ppm. HRMS *m/z* (ESI<sup>+</sup>): Calcd for C<sub>28</sub>H<sub>18</sub>F<sub>3</sub>NONa<sup>+</sup> (M+Na)<sup>+</sup> 464.1233, found 464.1234.

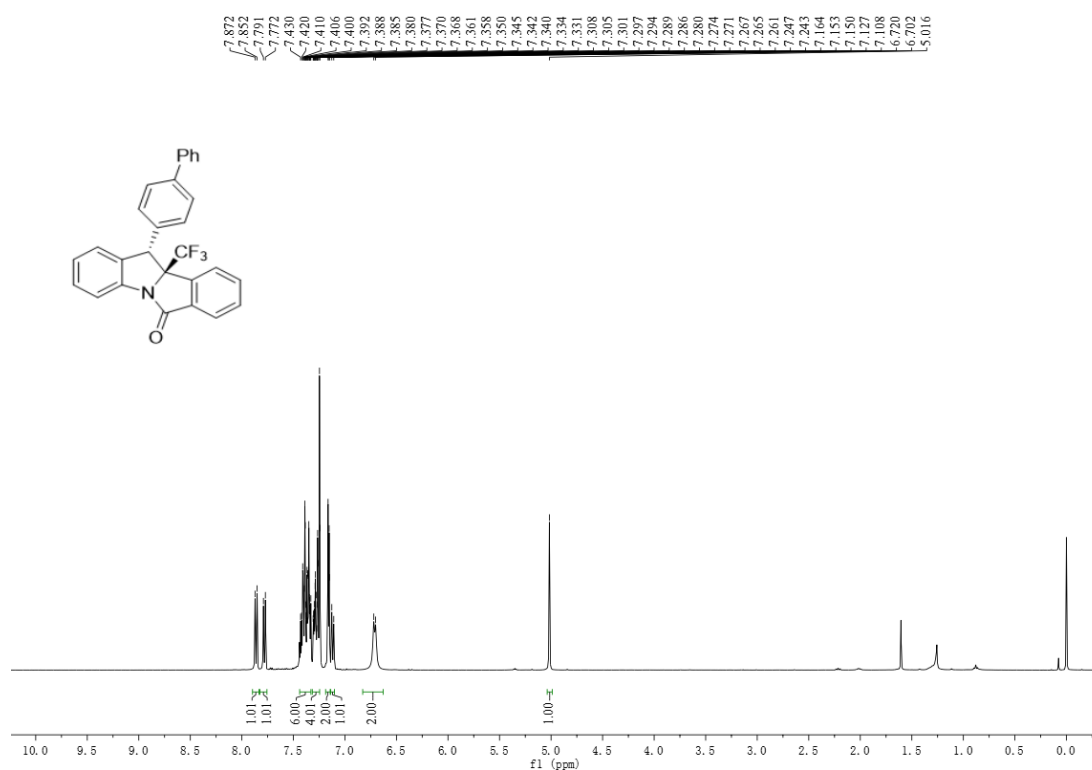

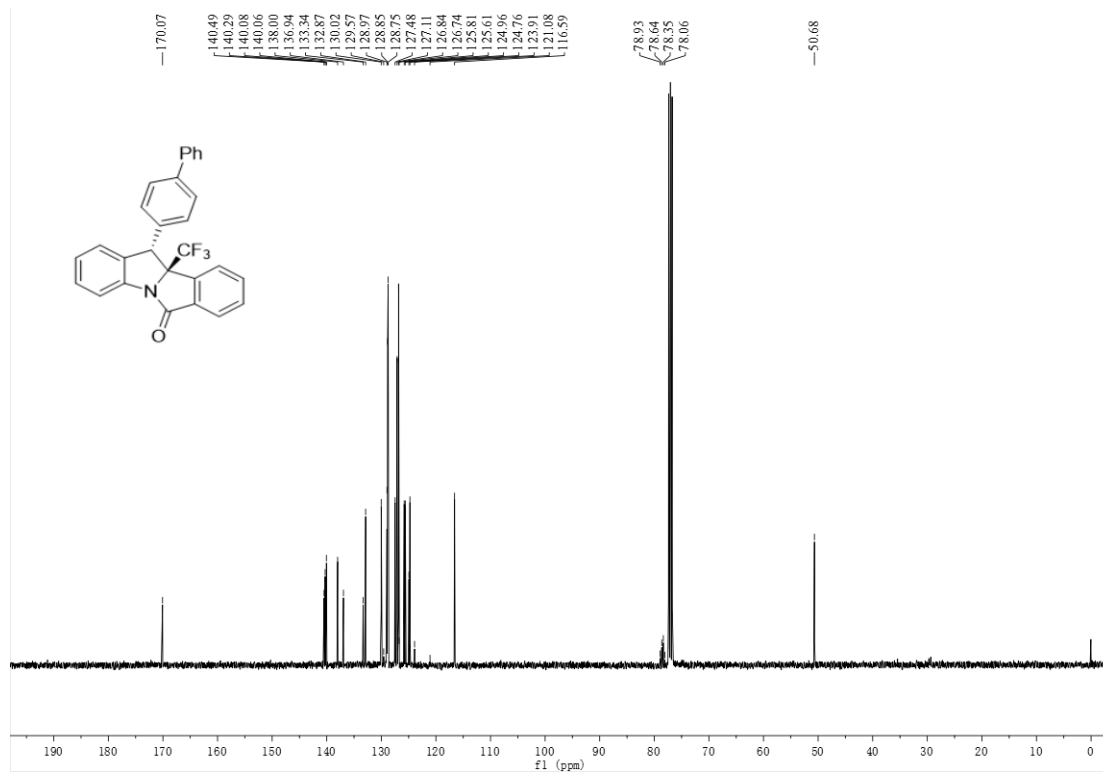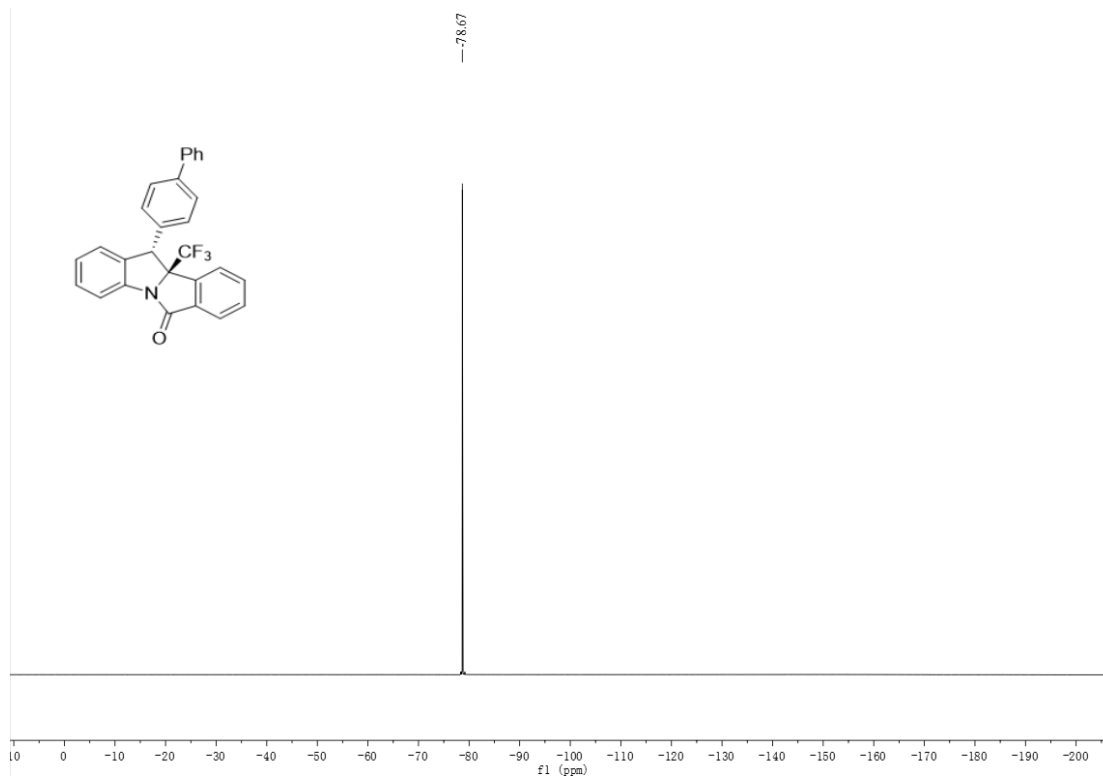

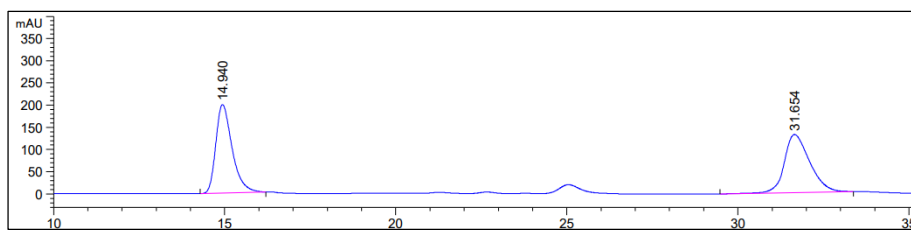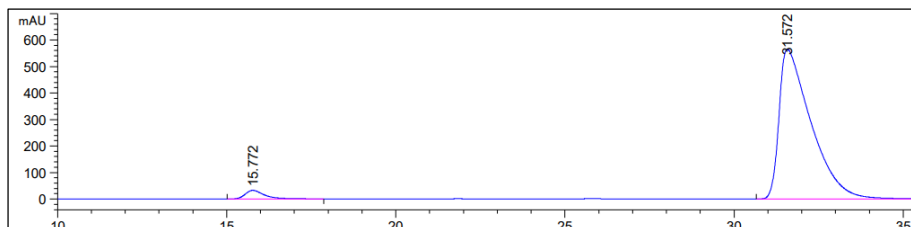

| Peak # | RetTime [min] | Type | Width [min] | Area [mAU*s] | Height [mAU] | Area %  |
|--------|---------------|------|-------------|--------------|--------------|---------|
| 1      | 15.772        | BB   | 0.5882      | 1300.75732   | 32.54968     | 3.3880  |
| 2      | 31.572        | BB   | 0.9459      | 3.70928e4    | 565.01642    | 96.6120 |

**(10*b*R,11*S*)-11-(4-fluorophenyl)-10*b*-(trifluoromethyl)-10*b*,11-dihydro-6*H*-isoindolo[2,1-*a*]indol-6-one (3*p*):**

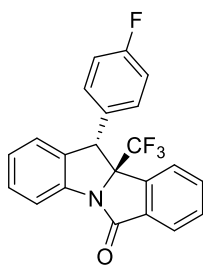

Purified by chromatography on silica gel, eluting with ethyl acetate/petroleum ether 1:80 (v/v); white solid (45% yield), m.p. 216-218 °C.  $[\alpha]_D^{20} = +58.8$  (c 0.5, CH<sub>2</sub>Cl<sub>2</sub>), 77% ee [Daicel Chiralpak A2 column (25 cm × 0.46 cm ID), "hexane/*i*PrOH = 90/10, 0.6 mL/min, 280 nm;  $t_{\text{minor}} = 9.7$  min,  $t_{\text{major}} = 13.5$  min]. <sup>1</sup>H NMR (600 MHz, CDCl<sub>3</sub>) δ 7.84 (d,  $J = 7.9$  Hz, 1H), 7.78 (d,  $J = 7.2$  Hz, 1H), 7.41 (dd,  $J = 7.5, 1.2$  Hz, 2H), 7.34 (t,  $J = 8.0$  Hz, 1H), 7.15 (t,  $J = 7.4$  Hz, 1H), 7.11 (d,  $J = 7.4$  Hz, 1H), 7.07 (d,  $J = 7.7$  Hz, 1H), 6.72 (t,  $J = 8.5$  Hz, 2H), 6.62 (s, 2H), 4.97 (s, 1H). <sup>13</sup>C NMR (150 MHz, CDCl<sub>3</sub>) δ 169.9, 161.9 (d,  $J = 244.5$  Hz), 140.4, 139.9, 136.7, 134.9 (d,  $J = 4.5$  Hz), 133.3, 132.9, 130.1 (d,  $J = 9.0$  Hz), 130.0, 129.1, 125.7 (d,  $J = 7.5$  Hz), 125.3 (q,  $J = 282.0$  Hz), 124.8, 116.6, 115.6, 115.4, 78.4 (q,  $J = 30.0$  Hz), 50.2. <sup>19</sup>F NMR (377 MHz, CDCl<sub>3</sub>) δ -78.7, -114.0 ppm. HRMS  $m/z$  (ESI<sup>+</sup>): Calcd for C<sub>22</sub>H<sub>13</sub>F<sub>4</sub>NONa<sup>+</sup> (M+Na)<sup>+</sup> 406.0826, found 406.0824.

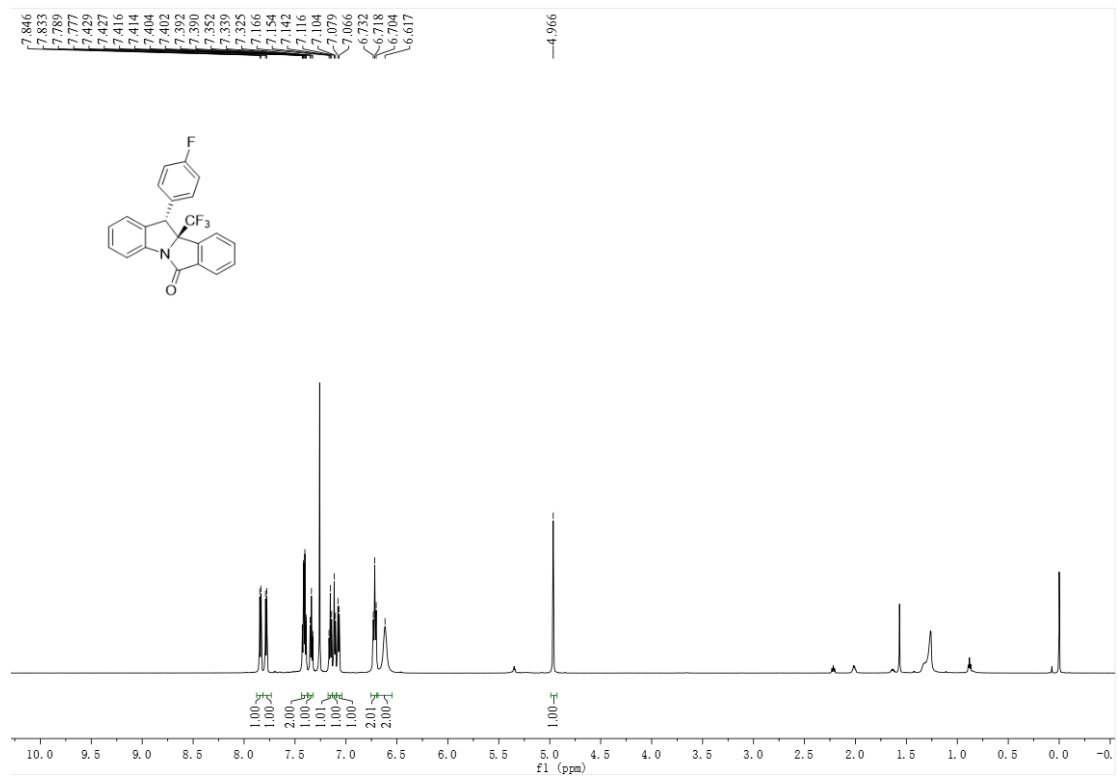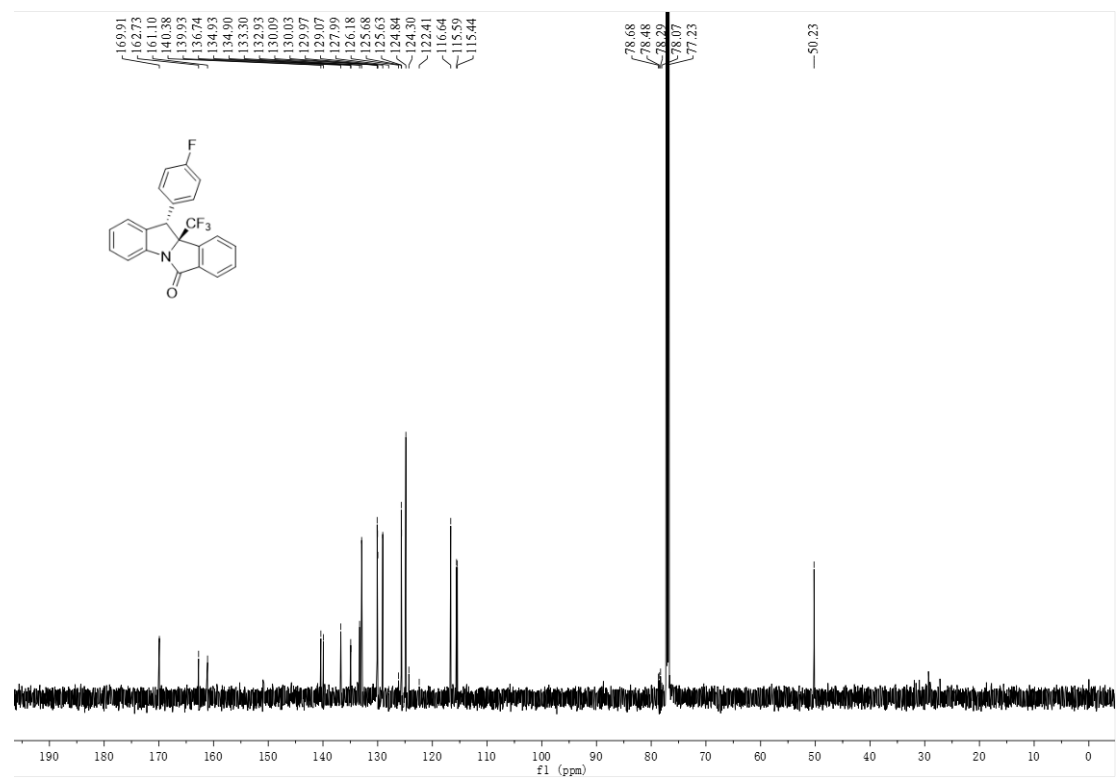

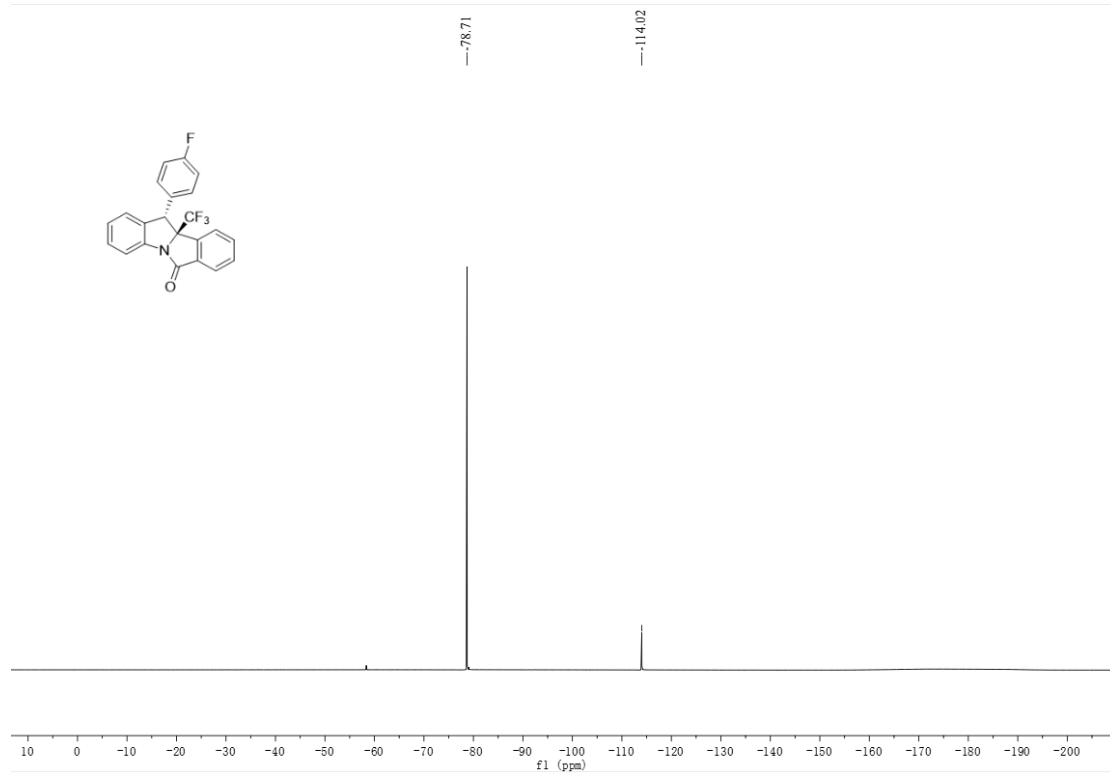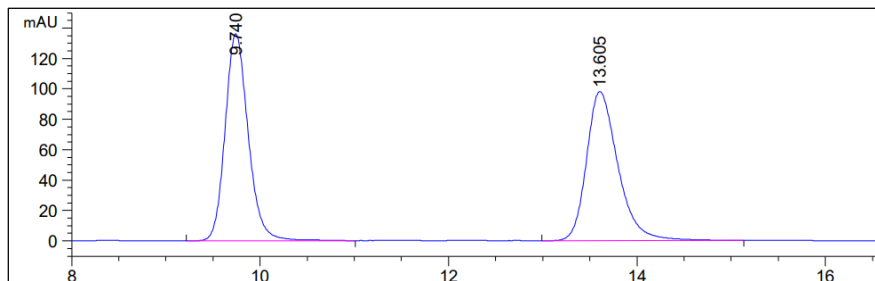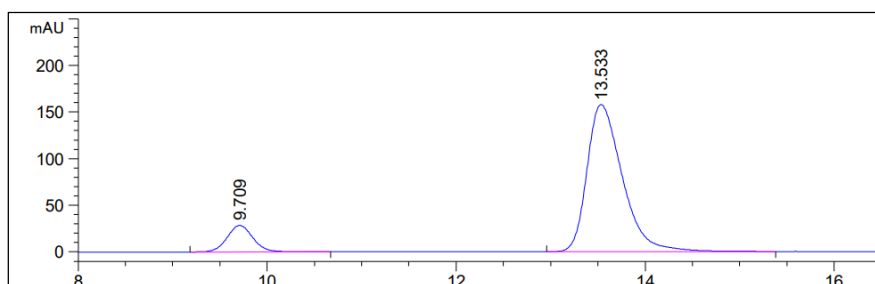

| Peak # | RetTime [min] | Type | Width [min] | Area [mAU*s] | Height [mAU] | Area %  |
|--------|---------------|------|-------------|--------------|--------------|---------|
| 1      | 9.709         | BB   | 0.2956      | 544.62036    | 28.41247     | 11.7068 |
| 2      | 13.533        | BB   | 0.3974      | 4107.53760   | 157.93803    | 88.2932 |



**(10*b*R,11*S*)-3-fluoro-11-phenyl-10*b*-(trifluoromethyl)-10*b*,11-dihydro-6*H*-isoindolo[2,1-*a*]indol-6-one (3*q*):**

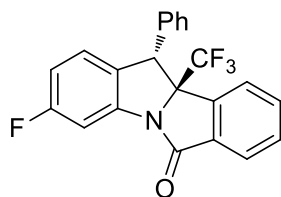

Purified by chromatography on silica gel, eluting with ethyl acetate/petroleum ether 1:80 (v/v); white solid (58% yield), m.p. 155-157 °C.  $[\alpha]_D^{20} = +89.1$  (c 0.5, CH<sub>2</sub>Cl<sub>2</sub>), 90% ee [Daicel Chiralpak OD-H column (25 cm × 0.46 cm ID), <sup>n</sup>hexane/<sup>i</sup>PrOH = 90/10, 0.6 mL/min, 230 nm;  $t_{\text{major}} = 7.3$  min,  $t_{\text{minor}} = 7.7$  min]. <sup>1</sup>H NMR (400 MHz, CDCl<sub>3</sub>) δ 7.77 (d,  $J = 7.5$  Hz, 1H), 7.57 (dd,  $J = 8.8, 2.5$  Hz, 1H), 7.37 (td,  $J = 7.5, 1.0$  Hz, 1H), 7.30 (td,  $J = 7.6, 1.3$  Hz, 1H), 7.13-6.96 (m, 5H), 6.83 (td,  $J = 8.7, 2.5$  Hz, 1H), 6.67-6.55 (m, 2H), 4.94 (s, 1H). <sup>13</sup>C NMR (100 MHz, CDCl<sub>3</sub>) δ 169.9, 163.1 (d,  $J = 245.0$  Hz), 141.7 (d,  $J = 13.0$  Hz), 140.1, 138.8, 133.0, 132.9, 132.4 (d,  $J = 3.0$  Hz), 130.1, 128.6, 128.4, 127.8, 126.6 (d,  $J = 7.0$  Hz), 124.9, 124.8, 125.2 (q,  $J = 282.0$  Hz), 112.4 (d,  $J = 23.0$  Hz), 104.7 (d,  $J = 27.0$  Hz), 79.2 (q,  $J = 30.0$  Hz), 50.44. <sup>19</sup>F NMR (377 MHz, CDCl<sub>3</sub>) δ -78.8, -111.9 ppm. HRMS  $m/z$  (ESI<sup>+</sup>): Calcd for C<sub>22</sub>H<sub>14</sub>F<sub>4</sub>NO<sup>+</sup> (M+H)<sup>+</sup> 384.1006, found 384.1011.

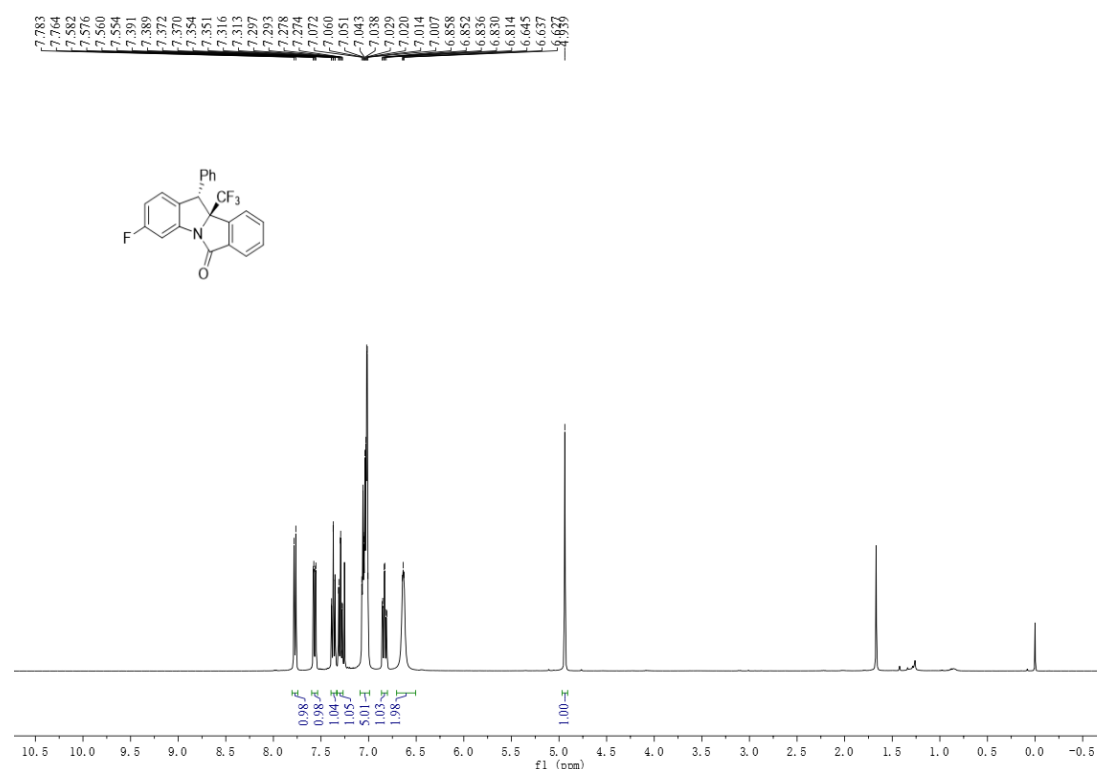

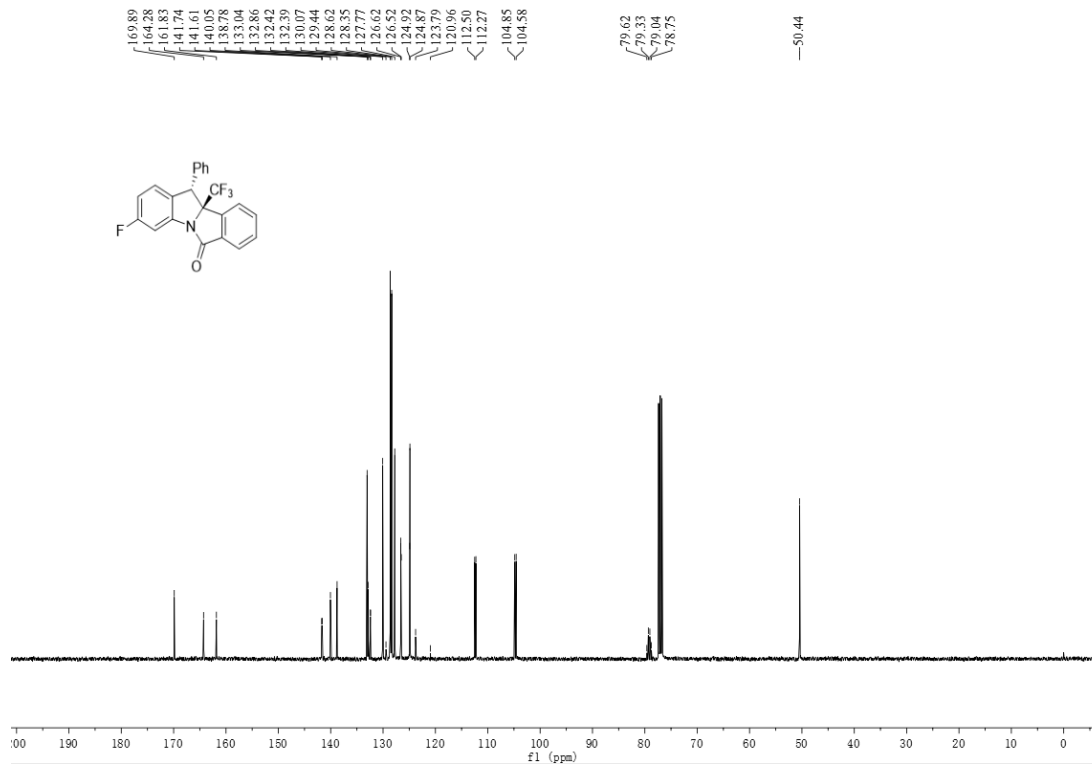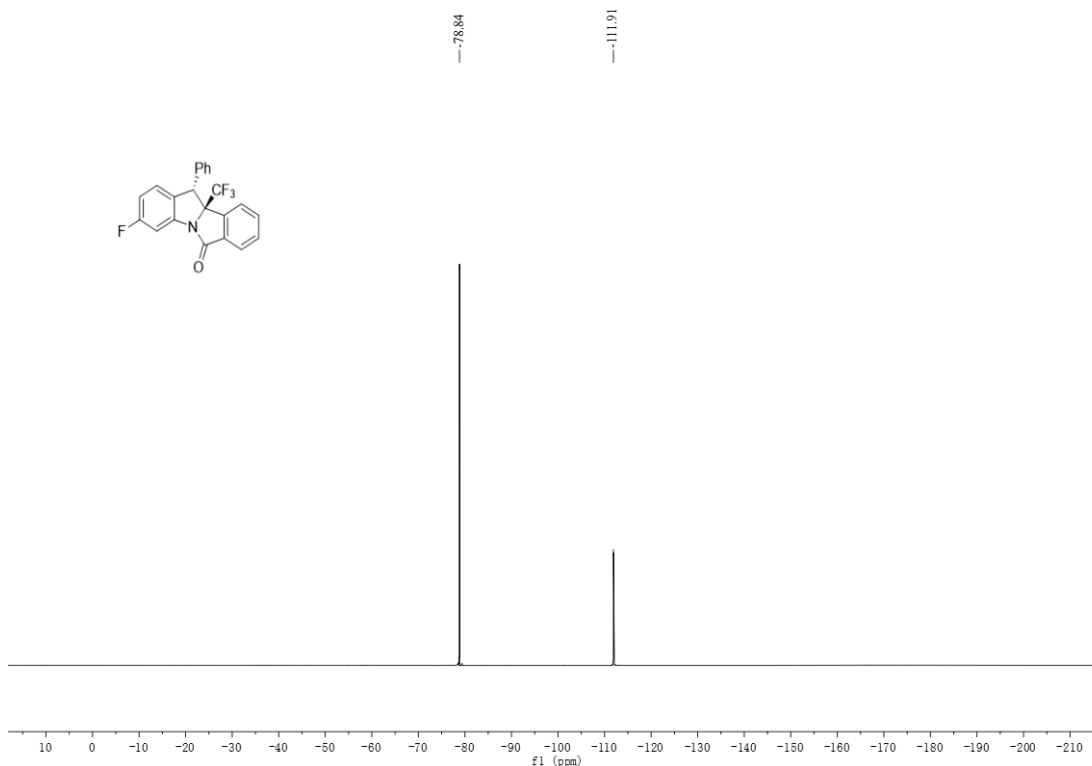

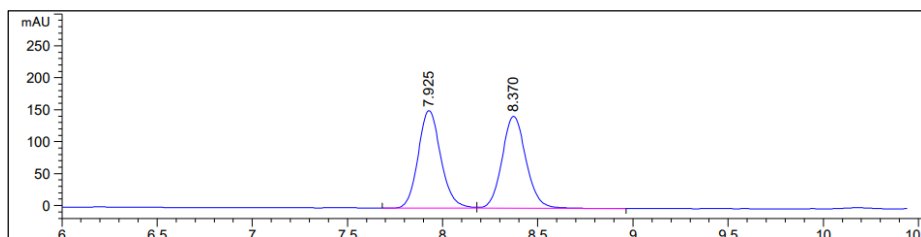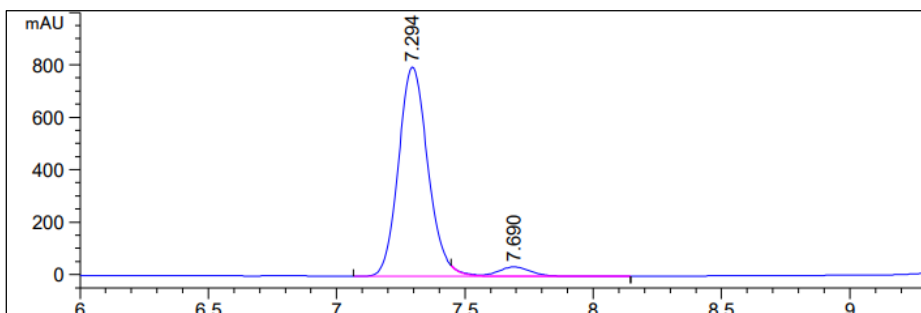

| Peak # | RetTime [min] | Type | Width [min] | Area [mAU*s] | Height [mAU] | Area %  |
|--------|---------------|------|-------------|--------------|--------------|---------|
| 1      | 7.294         | BV R | 0.1232      | 6377.10938   | 798.21820    | 95.0878 |
| 2      | 7.690         | VB E | 0.1382      | 329.43869    | 36.19021     | 4.9122  |

**(10*b*R,11*S*)-2-methoxy-11-phenyl-10*b*-(trifluoromethyl)-10*b*,11-dihydro-6*H*-isoindolo[2,1-*a*]indol-6-one (3*r*):**

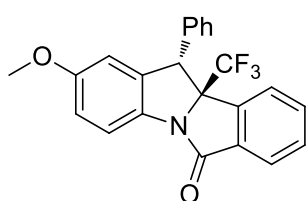

Purified by chromatography on silica gel, eluting with ethyl acetate/petroleum ether 1:80 (v/v); white solid (68% yield), m.p. 108-110 °C.  $[\alpha]_D^{20} = +53.4$  (c 0.5, CH<sub>2</sub>Cl<sub>2</sub>), 95% ee [Daicel Chiralpak OD-H column (25 cm × 0.46 cm ID), *n*hexane/*i*PrOH = 85/15, 0.6 mL/min, 280 nm;  $t_{\text{minor}} = 7.8$  min,  $t_{\text{major}} = 8.7$  min]. <sup>1</sup>H NMR (400 MHz, CDCl<sub>3</sub>) δ 7.74 (dd, *J* = 8.1, 4.0 Hz, 2H), 7.39-7.32 (m, 1H), 7.31-7.22 (m, 1H), 7.13-6.97 (m, 4H), 6.93 (dd, *J* = 8.6, 2.6 Hz, 1H), 6.66 (dd, *J* = 9.6, 4.7 Hz, 3H), 4.92 (s, 1H), 3.73 (s, 3H). <sup>13</sup>C NMR (125 MHz, CDCl<sub>3</sub>) δ 170.1, 157.8, 140.0, 138.7, 138.4, 134.1, 133.5, 132.5, 129.9, 128.5, 128.4, 127.6, 125.3 (q, *J* = 282.0 Hz), 124.8, 124.6, 117.1, 114.0, 111.7, 78.7 (q, *J* = 282.0 Hz), 55.6, 51.3. <sup>19</sup>F NMR (377 MHz, CDCl<sub>3</sub>) δ -78.8, -111.9 ppm. HRMS *m/z* (ESI<sup>+</sup>): Calcd for C<sub>23</sub>H<sub>17</sub>F<sub>3</sub>NO<sub>2</sub><sup>+</sup> (M+H)<sup>+</sup> 396.1206, found 396.1210.

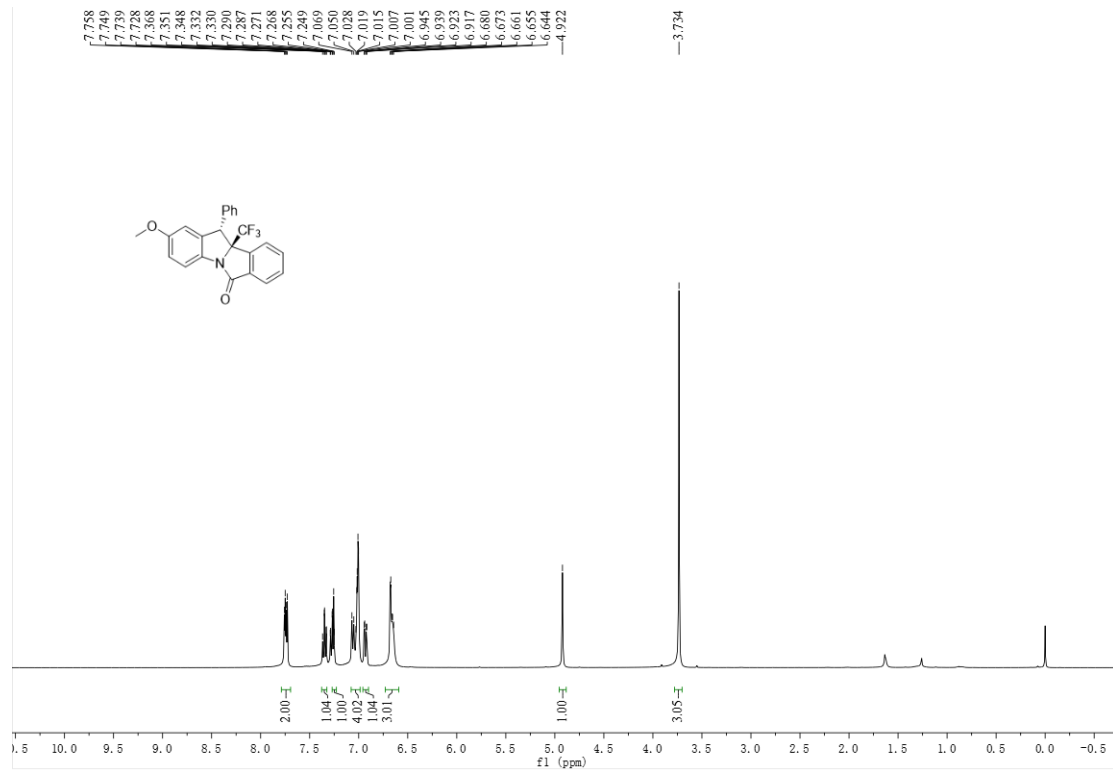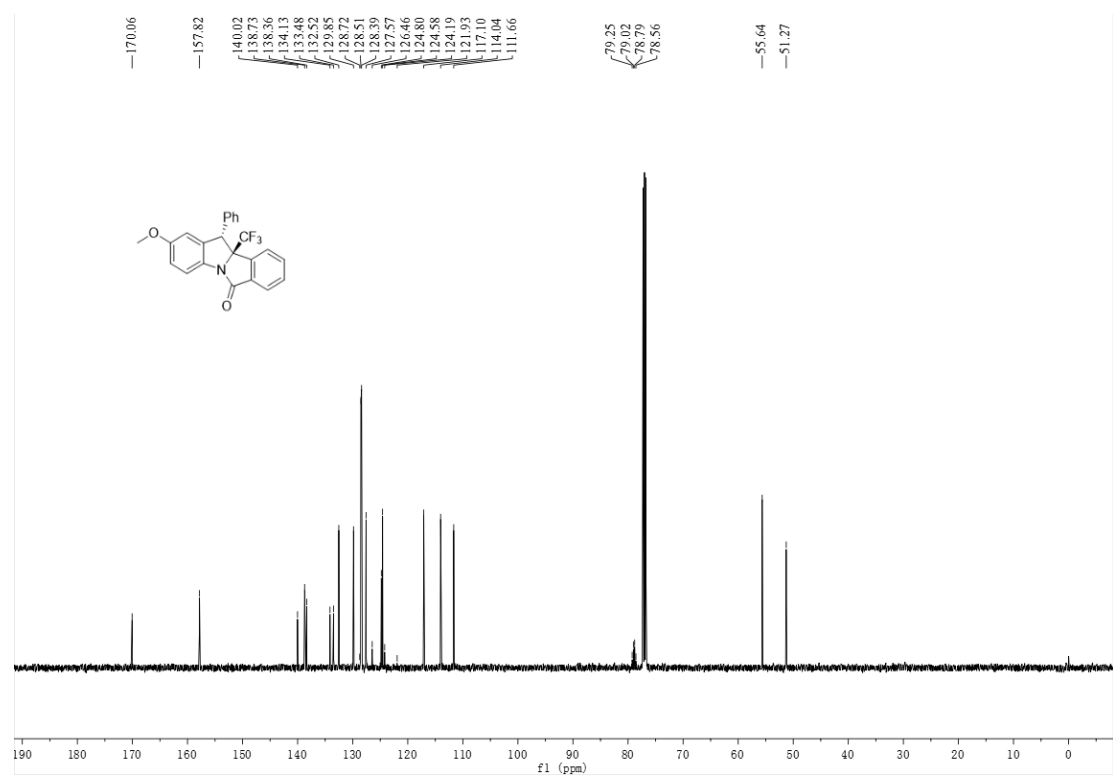

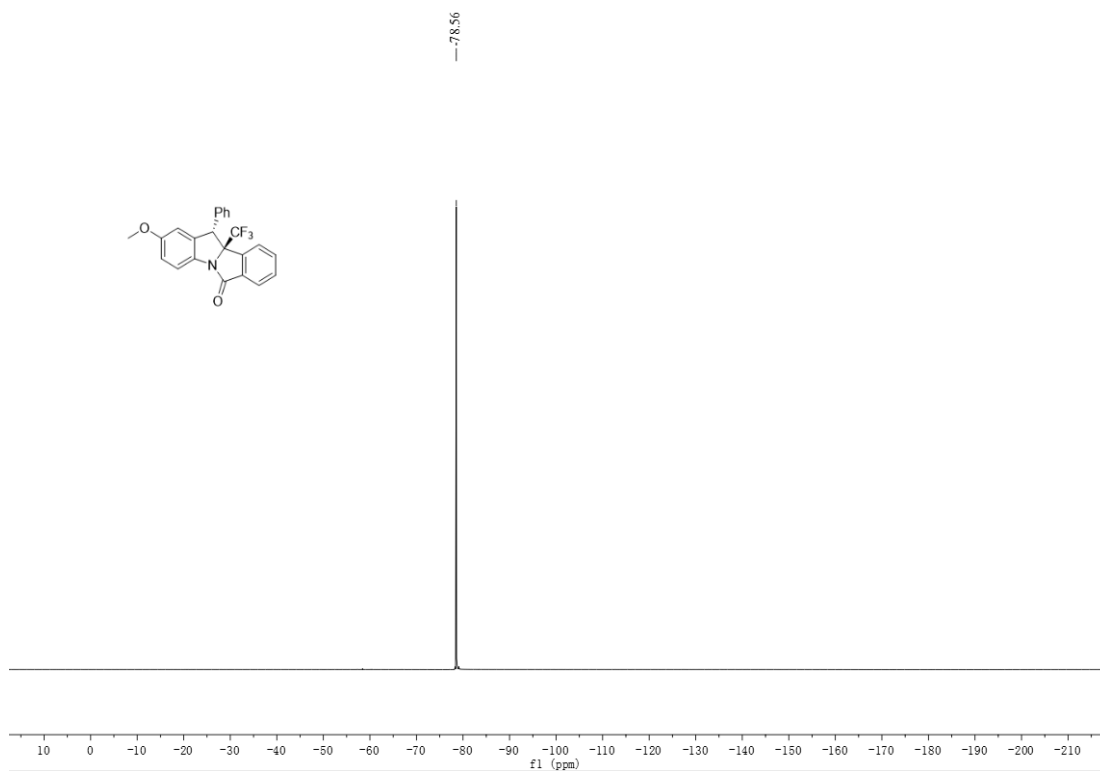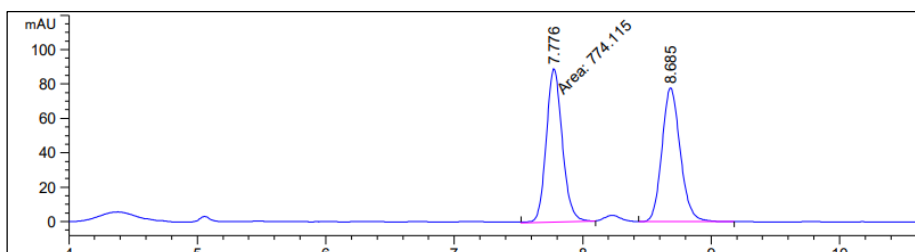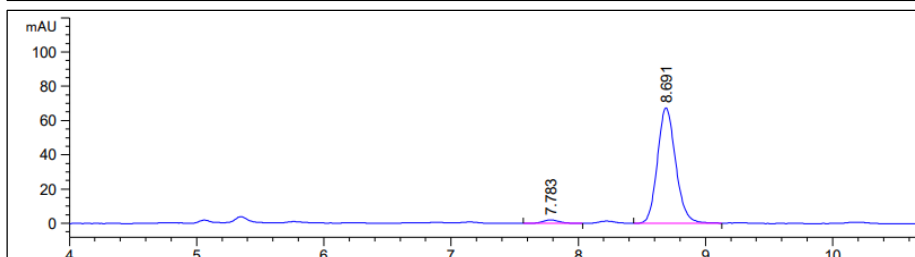

| Peak # | RetTime [min] | Type | Width [min] | Area [mAU*s] | Height [mAU] | Area %  |
|--------|---------------|------|-------------|--------------|--------------|---------|
| 1      | 7.783         | BB   | 0.1362      | 18.48601     | 2.07053      | 2.6851  |
| 2      | 8.691         | BB   | 0.1539      | 669.97699    | 67.43826     | 97.3149 |

## 6 Synthetic transformations

### 6.1 Bromination of 2a

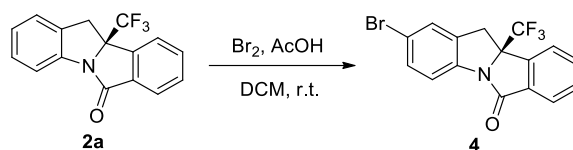

A reported procedure in the literature was followed for the synthesis of **4**<sup>[7]</sup>. To a suspension of **2a** (0.2 mmol, 99% ee) in AcOH (2 mL) was added Br<sub>2</sub> (160 mg, 2 mmol) at room temperature, and the mixture was stirred for 0.5 h. CH<sub>2</sub>Cl<sub>2</sub> (4 mL) was then introduced via a syringe. The resulting mixture was allowed to stir at room temperature overnight. The reaction was then quenched with saturated Na<sub>2</sub>S<sub>2</sub>O<sub>3</sub> and extracted with CH<sub>2</sub>Cl<sub>2</sub>. The combined organic layers were washed with brine, dried over MgSO<sub>4</sub>, and concentrated under reduced pressure. The residue was purified by flash chromatography on silica gel, eluting with ethyl acetate/petroleum ether 1:50 (v/v), to afford **4** (80% yield, 98% ee).

#### *(R)*-2-bromo-10b-(trifluoromethyl)-10b,11-dihydro-6H-isoindolo[2,1-a]indol-6-one (**4**):

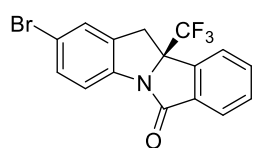

Purified by chromatography on silica gel, eluting with ethyl acetate/petroleum ether 1:50 (v/v); white solid (80% yield), m.p. 106-108 °C.  $[\alpha]_D^{20} = +171.2$  (c 0.5, CH<sub>2</sub>Cl<sub>2</sub>), 98% ee [Daicel Chiralpak C1 column (25 cm × 0.46 cm ID), *n*hexane/*i*PrOH = 90/10, 0.6 mL/min, 280 nm;  $t_{\text{minor}} = 10.3$  min,  $t_{\text{major}} = 10.7$  min]. <sup>1</sup>H NMR (400 MHz, CDCl<sub>3</sub>)  $\delta$  7.91 (d,  $J = 7.5$  Hz, 1H), 7.76-7.67 (m, 1H), 7.65-7.53 (m, 3H), 7.43 (d,  $J = 8.3$  Hz, 1H), 7.37 (s, 1H), 3.71 (d,  $J = 16.7$  Hz, 1H), 3.43 (d,  $J = 16.7$  Hz, 1H). <sup>13</sup>C NMR (100 MHz, CDCl<sub>3</sub>)  $\delta$  169.5, 142.3, 139.9, 135.5, 134.0, 133.0, 131.3, 130.7, 128.0, 125.6, 125.1 (q,  $J = 282.0$  Hz), 123.68, 123.61, 117.9, 78.4 (q,  $J = 30.0$  Hz), 34.56. <sup>19</sup>F NMR (377 MHz, CDCl<sub>3</sub>)  $\delta$  -79.1 ppm. HRMS  $m/z$  (ESI<sup>+</sup>): Calcd for C<sub>16</sub>H<sub>10</sub>BrF<sub>3</sub>NO<sup>+</sup> (M+H)<sup>+</sup> 369.9862, found 369.9865.

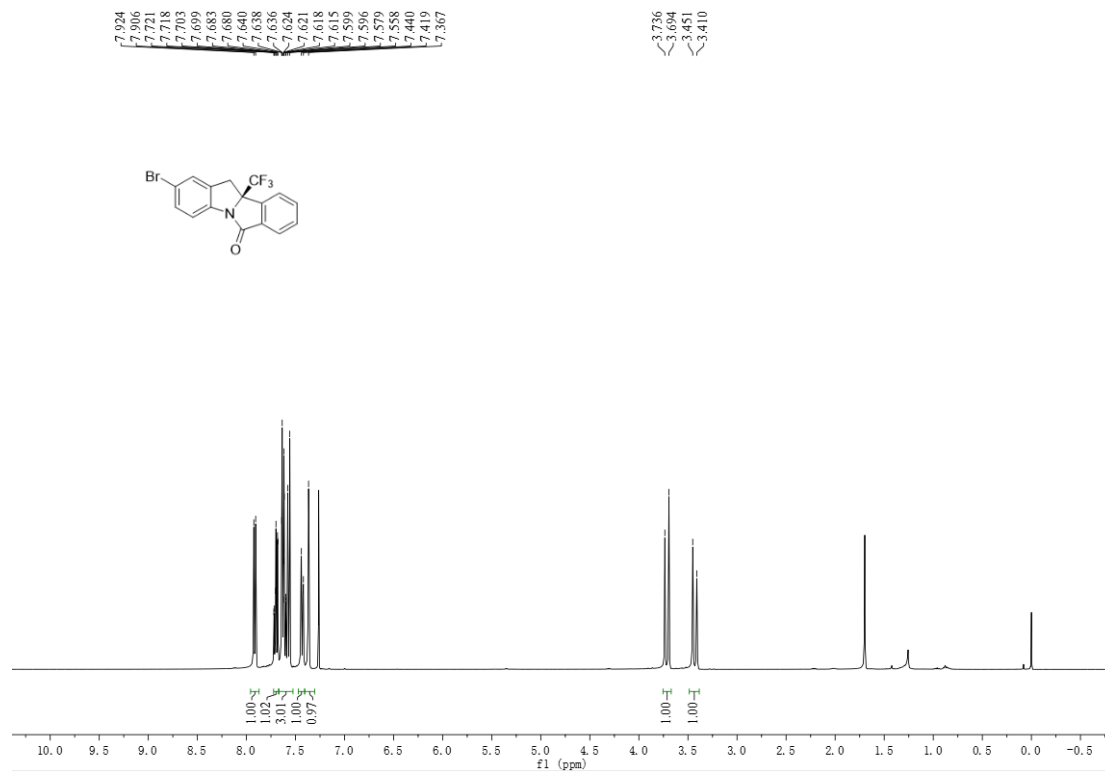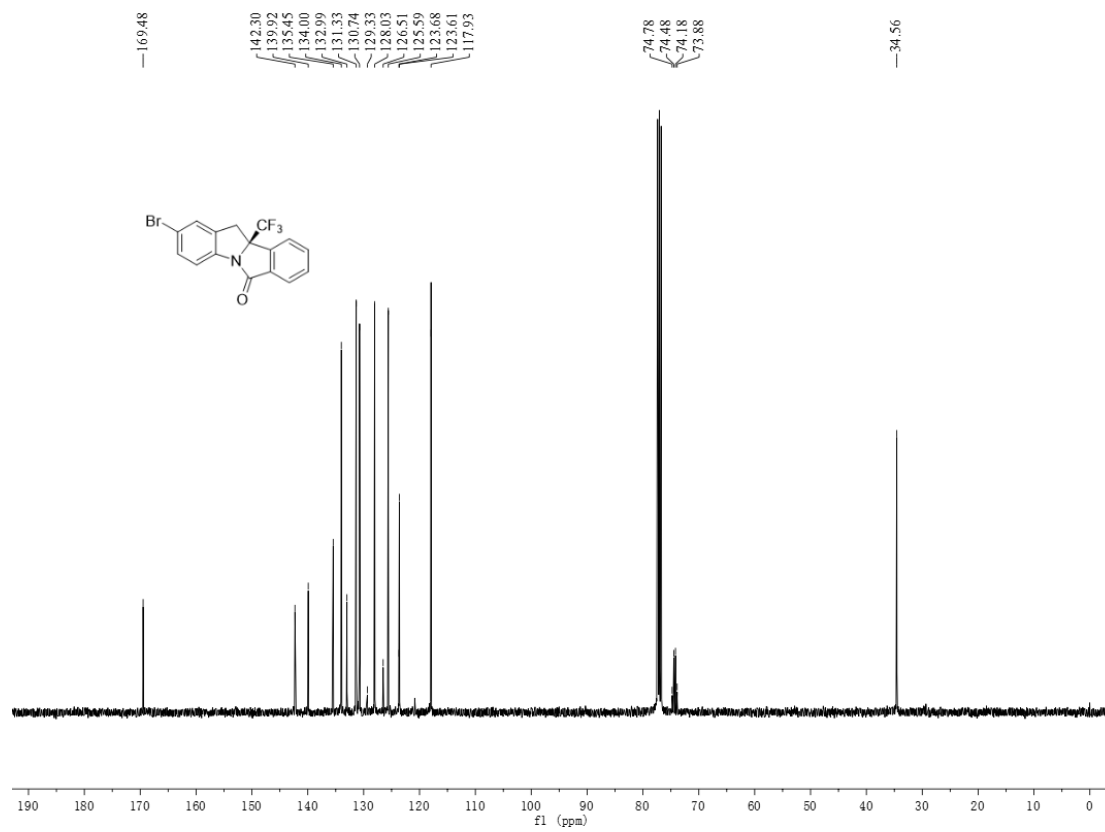

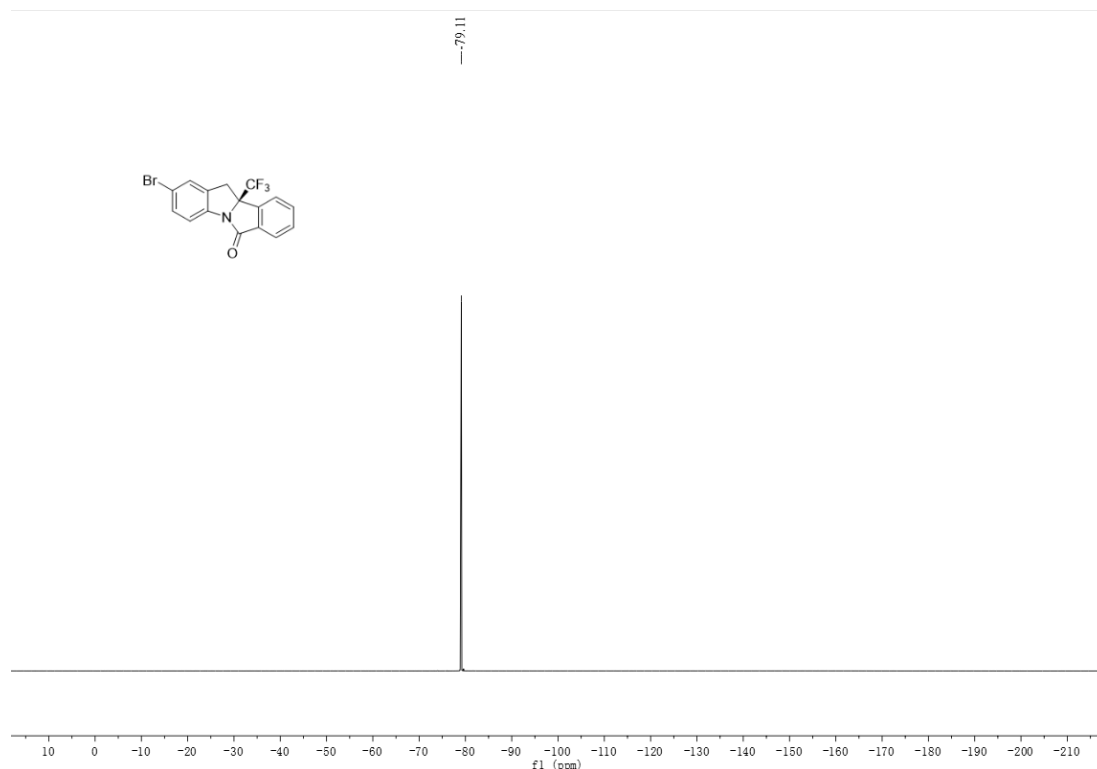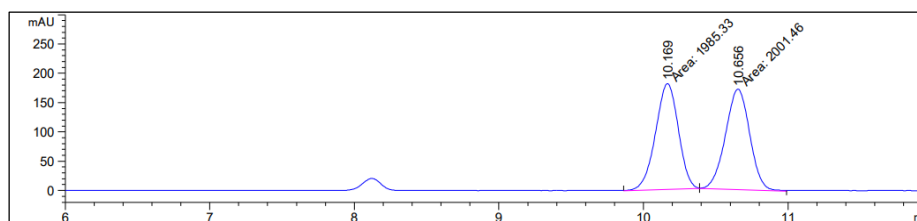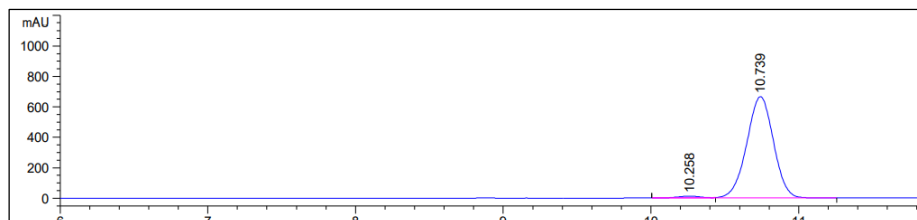

| Peak # | RetTime [min] | Type | Width [min] | Area [mAU*s] | Height [mAU] | Area %  |
|--------|---------------|------|-------------|--------------|--------------|---------|
| 1      | 10.259        | MM   | 0.1464      | 107.96466    | 12.29424     | 0.9816  |
| 2      | 10.739        | MM   | 0.2089      | 1.08909e4    | 868.80859    | 99.0184 |

## 6.2 Reduction of 2a

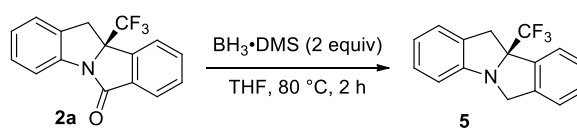

A reported procedure in the literature<sup>[8]</sup> was followed for the synthesis of **5**. To a solution of **2a** (0.2 mmol, 1 equiv) in THF (2 mL) was added  $\text{BH}_3 \cdot \text{DMS}$  (45.5  $\mu\text{L}$ , 0.4



mol, 2 equiv) dropwise. The resulting mixture was refluxed for 1 hour until the starting material was all consumed. The mixture was cooled to 0 °C and MeOH (1 mL) was added. After the evolution of gas ceased, the solution was concentrated under reduced pressure, the residue was purified by flash chromatography on silica gel, eluting with ethyl acetate/petroleum ether 1:50 (v/v), to afford **5** (94% yield, 98% ee).

**(R)-10b-(trifluoromethyl)-10b,11-dihydro-6H-isoindolo[2,1-a]indole (5):**

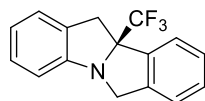

Purified by chromatography on silica gel, eluting with ethyl acetate/petroleum ether 1:50 (v/v); white solid (94% yield), m.p. 77-79 °C.  $[\alpha]_D^{20} = +212.0$  (c 0.5, CH<sub>2</sub>Cl<sub>2</sub>), 98% ee [Daicel Chiralpak A2 column (25 cm × 0.46 cm ID), <sup>n</sup>hexane/<sup>i</sup>PrOH = 90/10, 0.6 mL/min, 230 nm;  $t_{\text{major}} = 6.4$  min,  $t_{\text{minor}} = 6.7$  min]. <sup>1</sup>H NMR (400 MHz, CDCl<sub>3</sub>) δ 7.36-7.31 (m, 1H), 7.25-7.18 (m, 2H), 7.16-7.10 (m, 1H), 7.07 (t, *J* = 7.6 Hz, 1H), 6.98 (d, *J* = 6.8 Hz, 1H), 6.79-6.68 (m, 2H), 4.72 (d, *J* = 14.7 Hz, 1H), 4.34 (d, *J* = 14.6 Hz, 1H), 3.64 (d, *J* = 16.4 Hz, 1H), 3.44 (d, *J* = 16.4 Hz, 1H). <sup>13</sup>C NMR (100 MHz, CDCl<sub>3</sub>) δ 153.4, 141.0, 138.3, 129.5, 128.3, 128.0, 127.9, 126.6 (q, *J* = 282.0 Hz), 124.7, 123.8, 122.9, 121.5, 112.6, 80.4 (q, *J* = 30.0 Hz), 59.97, 37.26. <sup>19</sup>F NMR (377 MHz, CDCl<sub>3</sub>) δ -79.9 ppm. HRMS *m/z* (ESI+): Calcd for C<sub>16</sub>H<sub>13</sub>F<sub>3</sub>N<sup>+</sup> (M+H)<sup>+</sup> 276.0990, found 276.0993.

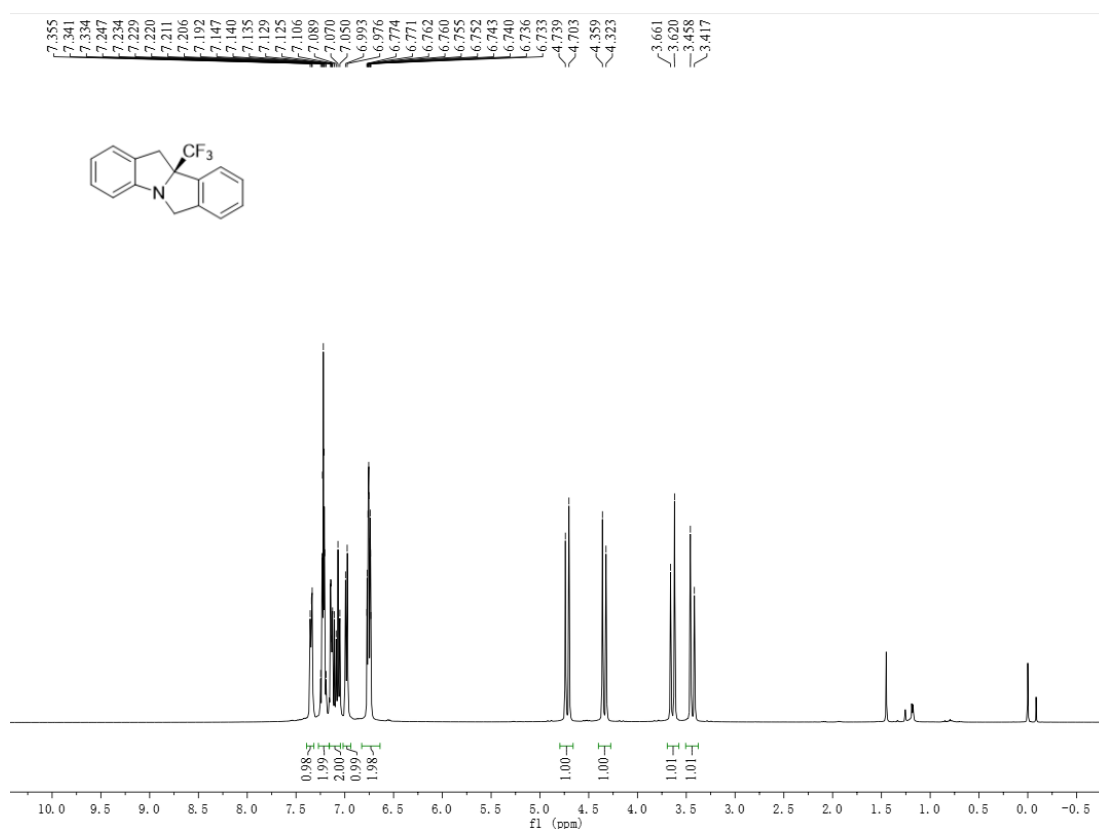

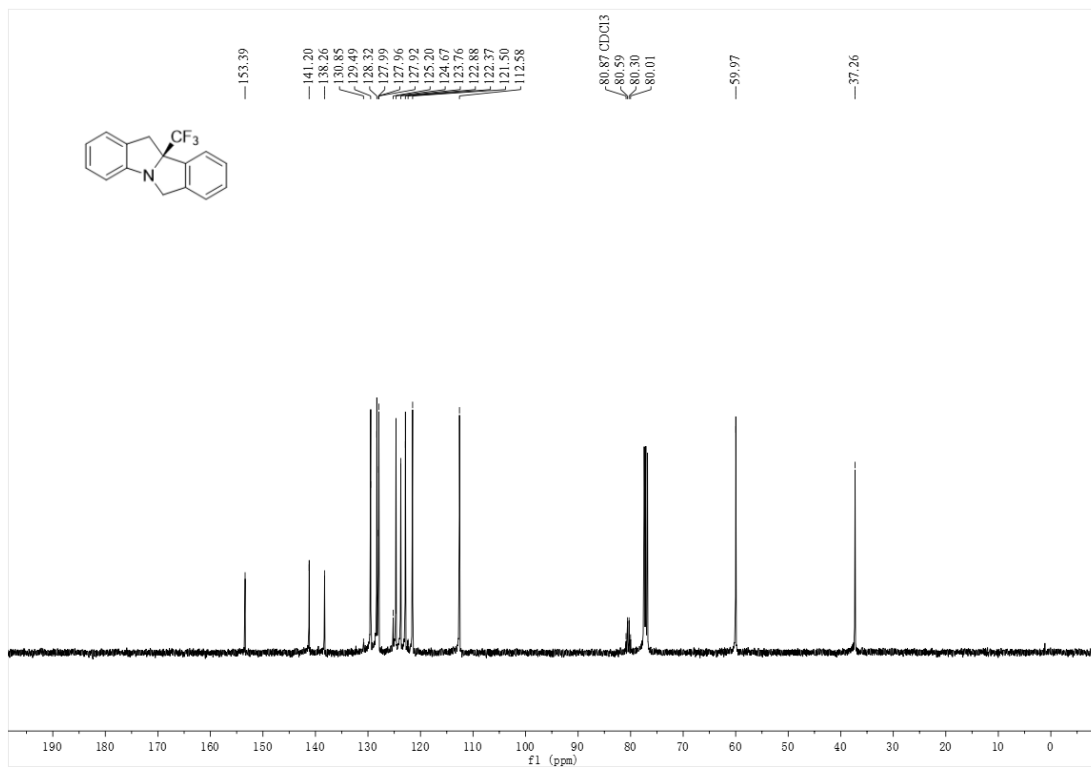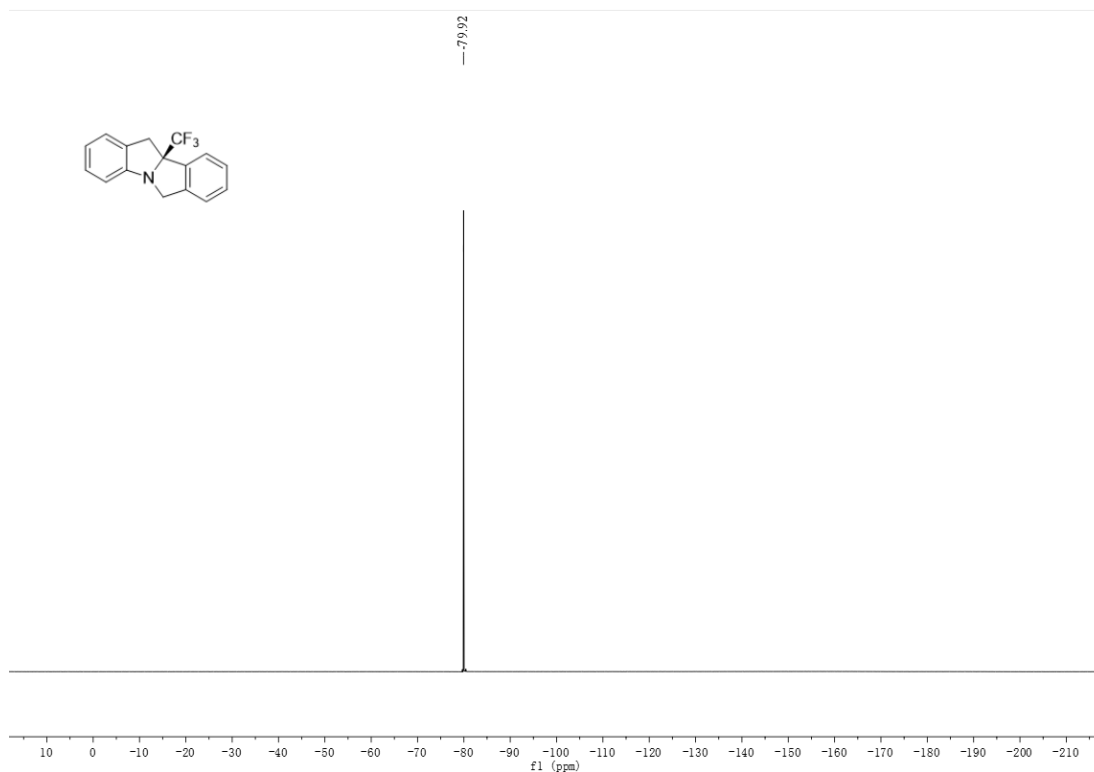

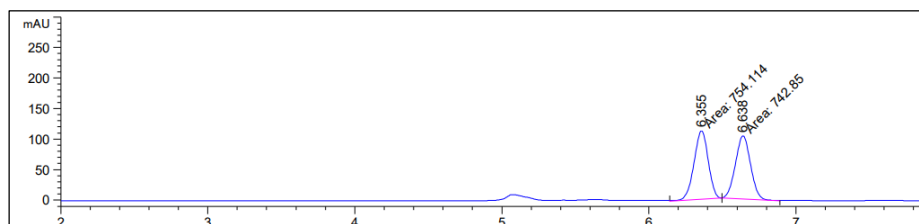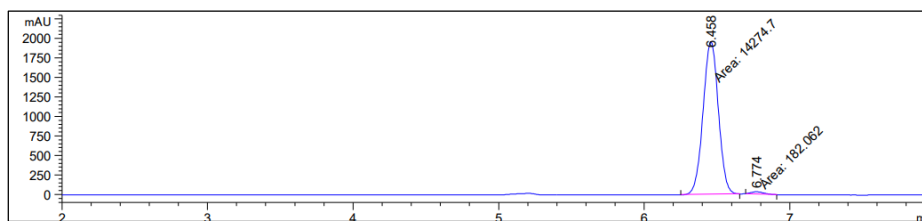

| Peak # | RetTime [min] | Type | Width [min] | Area [mAU*s] | Height [mAU] | Area %  |
|--------|---------------|------|-------------|--------------|--------------|---------|
| 1      | 6.458         | MM   | 0.1212      | 1.42747e4    | 1963.04309   | 98.7406 |
| 2      | 6.774         | MM   | 0.1020      | 182.06216    | 29.75239     | 1.2594  |

## 7 Crystal report of compounds 2f and 3a

### 7.1 Crystal report of compound 2f (grown in a mixed solvent of DCM and n-hexane)

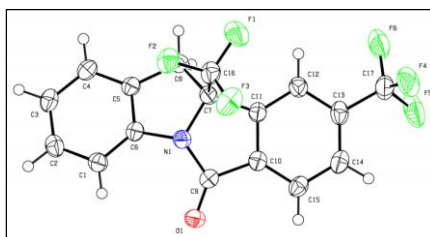

#### checkCIF/PLATON report

Structure factors have been supplied for datablock(s) cu\_210317\_cjf\_1\_4\_cf3\_0m

THIS REPORT IS FOR GUIDANCE ONLY. IF USED AS PART OF A REVIEW PROCEDURE FOR PUBLICATION, IT SHOULD NOT REPLACE THE EXPERTISE OF AN EXPERIENCED CRYSTALLOGRAPHIC REFEREE.

No syntax errors found. CIF dictionary Interpreting this report

#### Datablock: cu\_210317\_cjf\_1\_4\_cf3\_0m

|                        |                          |                                |                          |
|------------------------|--------------------------|--------------------------------|--------------------------|
| Bond precision:        | C-C = 0.0032 Å           | Wavelength=1.54178             |                          |
| Cell:                  | a=10.5776(5)<br>alpha=90 | b=6.1725(3)<br>beta=107.532(2) | c=12.0797(6)<br>gamma=90 |
| Temperature:           | 170 K                    |                                |                          |
|                        | Calculated               | Reported                       |                          |
| Volume                 | 752.05(6)                | 752.05(6)                      |                          |
| Space group            | P 21                     | P 1 21 1                       |                          |
| Hall group             | P 2yb                    | P 2yb                          |                          |
| Moiety formula         | C17 H9 F6 N O            | C17 H9 F6 N O                  |                          |
| Sum formula            | C17 H9 F6 N O            | C17 H9 F6 N O                  |                          |
| Mr                     | 357.25                   | 357.25                         |                          |
| Dx, g cm <sup>-3</sup> | 1.578                    | 1.578                          |                          |
| Z                      | 2                        | 2                              |                          |
| Mu (mm <sup>-1</sup> ) | 1.329                    | 1.329                          |                          |
| F000                   | 360.0                    | 360.0                          |                          |
| F000'                  | 361.60                   |                                |                          |
| h, k, lmax             | 12, 7, 14                | 12, 7, 14                      |                          |
| Nref                   | 2748[ 1513]              | 2740                           |                          |
| Tmin, Tmax             | 0.625, 0.671             | 0.589, 0.753                   |                          |
| Tmin'                  | 0.567                    |                                |                          |

Correction method= # Reported T Limits: Tmin=0.589 Tmax=0.753  
AbsCorr = MULTI-SCAN

Data completeness= 1.81/1.00      Theta(max)= 68.124

R(reflections)= 0.0317( 2694)      wR2(reflections)= 0.0790( 2740)

S = 1.075      Npar= 226

The following ALERTS were generated. Each ALERT has the format  
**test-name\_ALERT\_alert-type\_alert-level.**  
Click on the hyperlinks for more details of the test.

| Alert level G     |                                                  |             |
|-------------------|--------------------------------------------------|-------------|
| PLAT242_ALERT_2_G | Low 'MainMol' Ueq as Compared to Neighbors of    | C16 Check   |
| PLAT242_ALERT_2_G | Low 'MainMol' Ueq as Compared to Neighbors of    | C17 Check   |
| PLAT432_ALERT_2_G | Short Inter X...Y Contact 01 ..C9                | 2.94 Ang.   |
|                   | 1-x,-1/2+y,1-z =                                 | 2_646 Check |
| PLAT791_ALERT_4_G | Model has Chirality at C7 (Sohnke SpGr)          | R Verify    |
| PLAT909_ALERT_3_G | Percentage of I>2sig(I) Data at Theta(Max) Still | 97% Note    |
| PLAT912_ALERT_4_G | Missing # of FCF Reflections Above STh/L= 0.600  | 2 Note      |
| PLAT978_ALERT_2_G | Number C-C Bonds with Positive Residual Density. | 2 Info      |

- 
- 0 **ALERT level A** = Most likely a serious problem - resolve or explain
  - 0 **ALERT level B** = A potentially serious problem, consider carefully
  - 1 **ALERT level C** = Check. Ensure it is not caused by an omission or oversight
  - 7 **ALERT level G** = General information/check it is not something unexpected

- 0 ALERT type 1 CIF construction/syntax error, inconsistent or missing data
  - 4 ALERT type 2 Indicator that the structure model may be wrong or deficient
  - 2 ALERT type 3 Indicator that the structure quality may be low
  - 2 ALERT type 4 Improvement, methodology, query or suggestion
  - 0 ALERT type 5 Informative message, check
- 

It is advisable to attempt to resolve as many as possible of the alerts in all categories. Often the minor alerts point to easily fixed oversights, errors and omissions in your CIF or refinement strategy, so attention to these fine details can be worthwhile. In order to resolve some of the more serious problems it may be necessary to carry out additional measurements or structure refinements. However, the purpose of your study may justify the reported deviations and the more serious of these should normally be commented upon in the discussion or experimental section of a paper or in the "special\_details" fields of the CIF. checkCIF was carefully designed to identify outliers and unusual parameters, but every test has its limitations and alerts that are not important in a particular case may appear. Conversely, the absence of alerts does not guarantee there are no aspects of the results needing attention. It is up to the individual to critically assess their own results and, if necessary, seek expert advice.

#### Publication of your CIF in IUCr journals

A basic structural check has been run on your CIF. These basic checks will be run on all CIFs submitted for publication in IUCr journals (*Acta Crystallographica*, *Journal of Applied Crystallography*, *Journal of Synchrotron Radiation*); however, if you intend to submit to *Acta Crystallographica Section C* or *E* or *IUCrData*, you should make sure that full publication checks are run on the final version of your CIF prior to submission.

#### Publication of your CIF in other journals

Please refer to the *Notes for Authors* of the relevant journal for any special instructions relating to CIF submission.

## 7.2 Crystal report of compound 3a (grown in a mixed solvent of DCM and n-hexane)

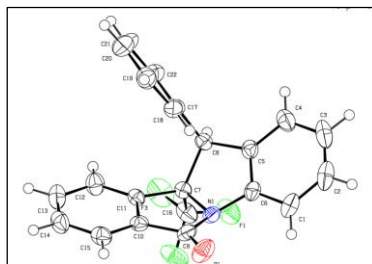

### checkCIF/PLATON report

Structure factors have been supplied for datablock(s) cu\_210316\_cjf\_2\_bd\_0m

THIS REPORT IS FOR GUIDANCE ONLY. IF USED AS PART OF A REVIEW PROCEDURE FOR PUBLICATION, IT SHOULD NOT REPLACE THE EXPERTISE OF AN EXPERIENCED CRYSTALLOGRAPHIC REFEREE.

No syntax errors found. CIF dictionary Interpreting this report

### Datablock: cu\_210316\_cjf\_2\_bd\_0m

---

|                 |                |                    |              |
|-----------------|----------------|--------------------|--------------|
| Bond precision: | C-C = 0.0026 A | Wavelength=1.54178 |              |
| Cell:           | a=9.7165 (13)  | b=11.402 (2)       | c=15.962 (2) |
|                 | alpha=90       | beta=90            | gamma=90     |
| Temperature:    | 170 K          |                    |              |

  

|                | Calculated     | Reported       |
|----------------|----------------|----------------|
| Volume         | 1768.4 (4)     | 1768.5 (5)     |
| Space group    | P 21 21 21     | P 21 21 21     |
| Hall group     | P 2ac 2ab      | P 2ac 2ab      |
| Moiety formula | C22 H14 F3 N O | C22 H14 F3 N O |
| Sum formula    | C22 H14 F3 N O | C22 H14 F3 N O |
| Mr             | 365.34         | 365.34         |
| Dx, g cm-3     | 1.372          | 1.372          |
| Z              | 4              | 4              |
| Mu (mm-1)      | 0.895          | 0.895          |
| F000           | 752.0          | 752.0          |
| F000'          | 754.68         |                |
| h, k, lmax     | 11, 13, 19     | 11, 13, 19     |
| Nref           | 3237 [ 1863]   | 3236           |
| Tmin, Tmax     | 0.777, 0.814   | 0.664, 0.753   |
| Tmin'          | 0.696          |                |

Correction method= # Reported T Limits: Tmin=0.664 Tmax=0.753  
AbsCorr = MULTI-SCAN

Data completeness= 1.74/1.00      Theta(max)= 68.256

R(reflections)= 0.0290 ( 3217)      wR2(reflections)= 0.0729 ( 3236)

S = 1.072      Npar= 244

---

The following ALERTS were generated. Each ALERT has the format  
**test-name\_ALERT\_alert-type\_alert-level.**  
Click on the hyperlinks for more details of the test.

---

● **Alert level C**  
PLAT230\_ALERT\_2\_C Hirshfeld Test Diff for C20 --C21 . 6.2 s.u.

---

● **Alert level G**  
PLAT242\_ALERT\_2\_G Low 'MainMol' Ueq as Compared to Neighbors of C16 Check  
PLAT791\_ALERT\_4\_G Model has Chirality at C7 (Sohnke SpGr) R Verify  
PLAT791\_ALERT\_4\_G Model has Chirality at C8 (Sohnke SpGr) S Verify  
PLAT978\_ALERT\_2\_G Number C-C Bonds with Positive Residual Density. 0 Info

---

0 **ALERT level A** = Most likely a serious problem - resolve or explain  
0 **ALERT level B** = A potentially serious problem, consider carefully  
1 **ALERT level C** = Check. Ensure it is not caused by an omission or oversight  
4 **ALERT level G** = General information/check it is not something unexpected

0 ALERT type 1 CIF construction/syntax error, inconsistent or missing data  
3 ALERT type 2 Indicator that the structure model may be wrong or deficient  
0 ALERT type 3 Indicator that the structure quality may be low  
2 ALERT type 4 Improvement, methodology, query or suggestion  
0 ALERT type 5 Informative message, check

---

It is advisable to attempt to resolve as many as possible of the alerts in all categories. Often the minor alerts point to easily fixed oversights, errors and omissions in your CIF or refinement strategy, so attention to these fine details can be worthwhile. In order to resolve some of the more serious problems it may be necessary to carry out additional measurements or structure refinements. However, the purpose of your study may justify the reported deviations and the more serious of these should normally be commented upon in the discussion or experimental section of a paper or in the "special\_details" fields of the CIF. checkCIF was carefully designed to identify outliers and unusual parameters, but every test has its limitations and alerts that are not important in a particular case may appear. Conversely, the absence of alerts does not guarantee there are no aspects of the results needing attention. It is up to the individual to critically assess their own results and, if necessary, seek expert advice.

#### **Publication of your CIF in IUCr journals**

A basic structural check has been run on your CIF. These basic checks will be run on all CIFs submitted for publication in IUCr journals (*Acta Crystallographica*, *Journal of Applied Crystallography*, *Journal of Synchrotron Radiation*); however, if you intend to submit to *Acta Crystallographica Section C* or *E* or *IUCrData*, you should make sure that full publication checks are run on the final version of your CIF prior to submission.

#### **Publication of your CIF in other journals**

Please refer to the *Notes for Authors* of the relevant journal for any special instructions relating to CIF submission.

---

**PLATON version of 05/12/2020; check.def file version of 05/12/2020**

## 7. References

- [1] K. Aikawa, T. Okamoto, K. Mikami, *J. Am. Chem. Soc.*, 2012, **134**, 10329.
- [2] F. Verdugo, L. Villarino, J. Durán, M. Gulías, J. L. Mascareñas, F. López, *ACS Catal.*, 2018, **8**, 6100.
- [3] T.-F. Zhang, Q.-W. Ma, W.-G. Ni, Z.-X. Wang, *Synthesis*, 2014, **46**, 3309.
- [4] Z.-X. Wang, F.-L. Ge, W. Wen, H.-Z. Jiang, H. Jian, *J. Org. Chem.*, 2007, **128**, 1143.
- [5] J. Pedroni, N. Cramer, *Org. Lett.*, 2016, **18**, 1932.
- [6] W.-J. Zhou, K.-H. Wang, J.-X. Wang, Z.-R. Gao, *Tetrahedron*, 2010, **66**, 7633.
- [7] C. Shen, R.-R. Liu, Y.-X. Jia, *J. Am. Chem. Soc.*, 2015, **137**, 4936.
- [8] D. A. Petrone, M. Kondo, M. Lautens, *Chem. Eur. J.*, 2016, **22**, 5684.
